# Supplementary material
Source: publisher site journal article supplement (https://www.dovepress.com/article/490844)
Supplement: Supplementary file 1 [file get_supplementary_file.php]

***Supplementary Material***


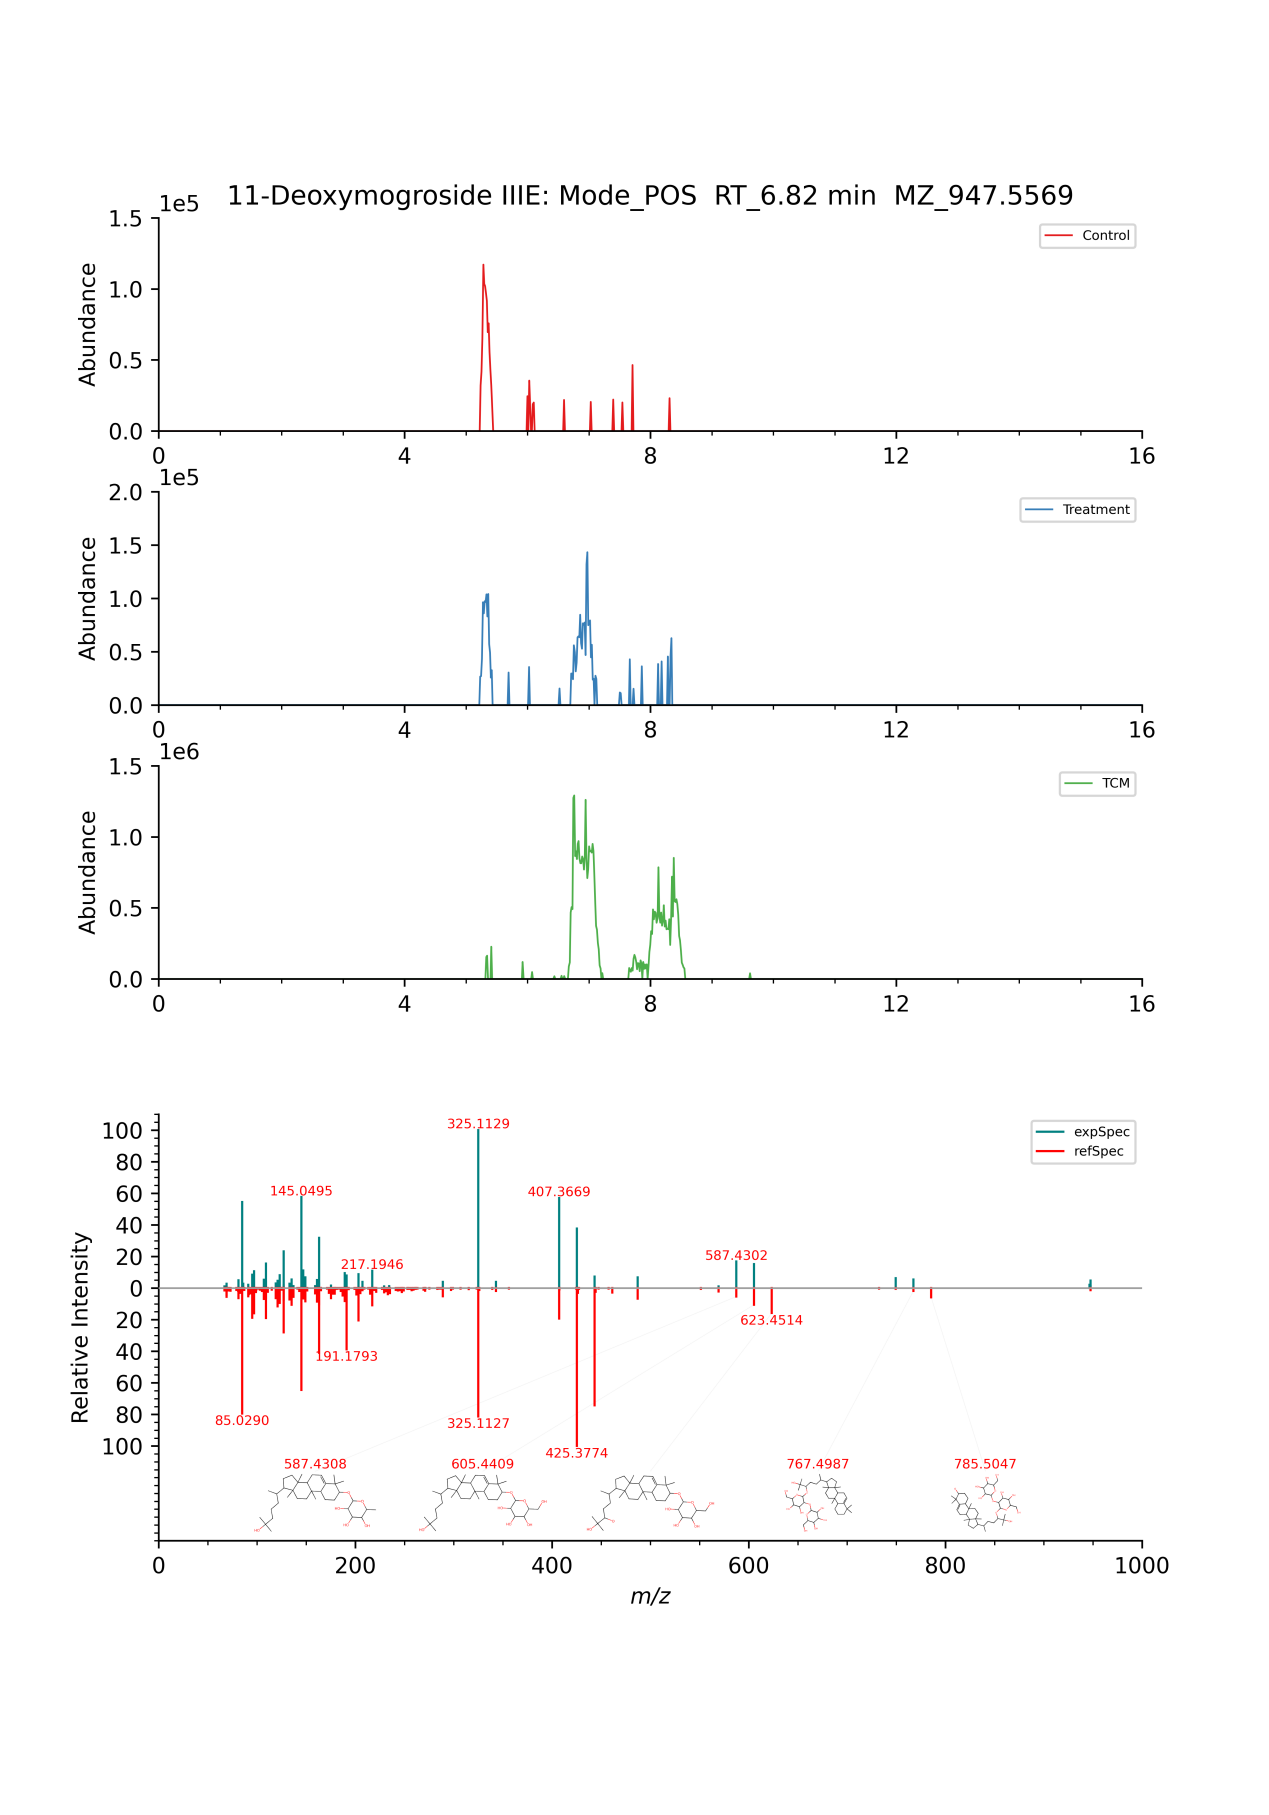


**Supplementary Figure 1.** Mass spectrometry of 11-Deoxymogroside IIIE and potential fragmentation pathways.


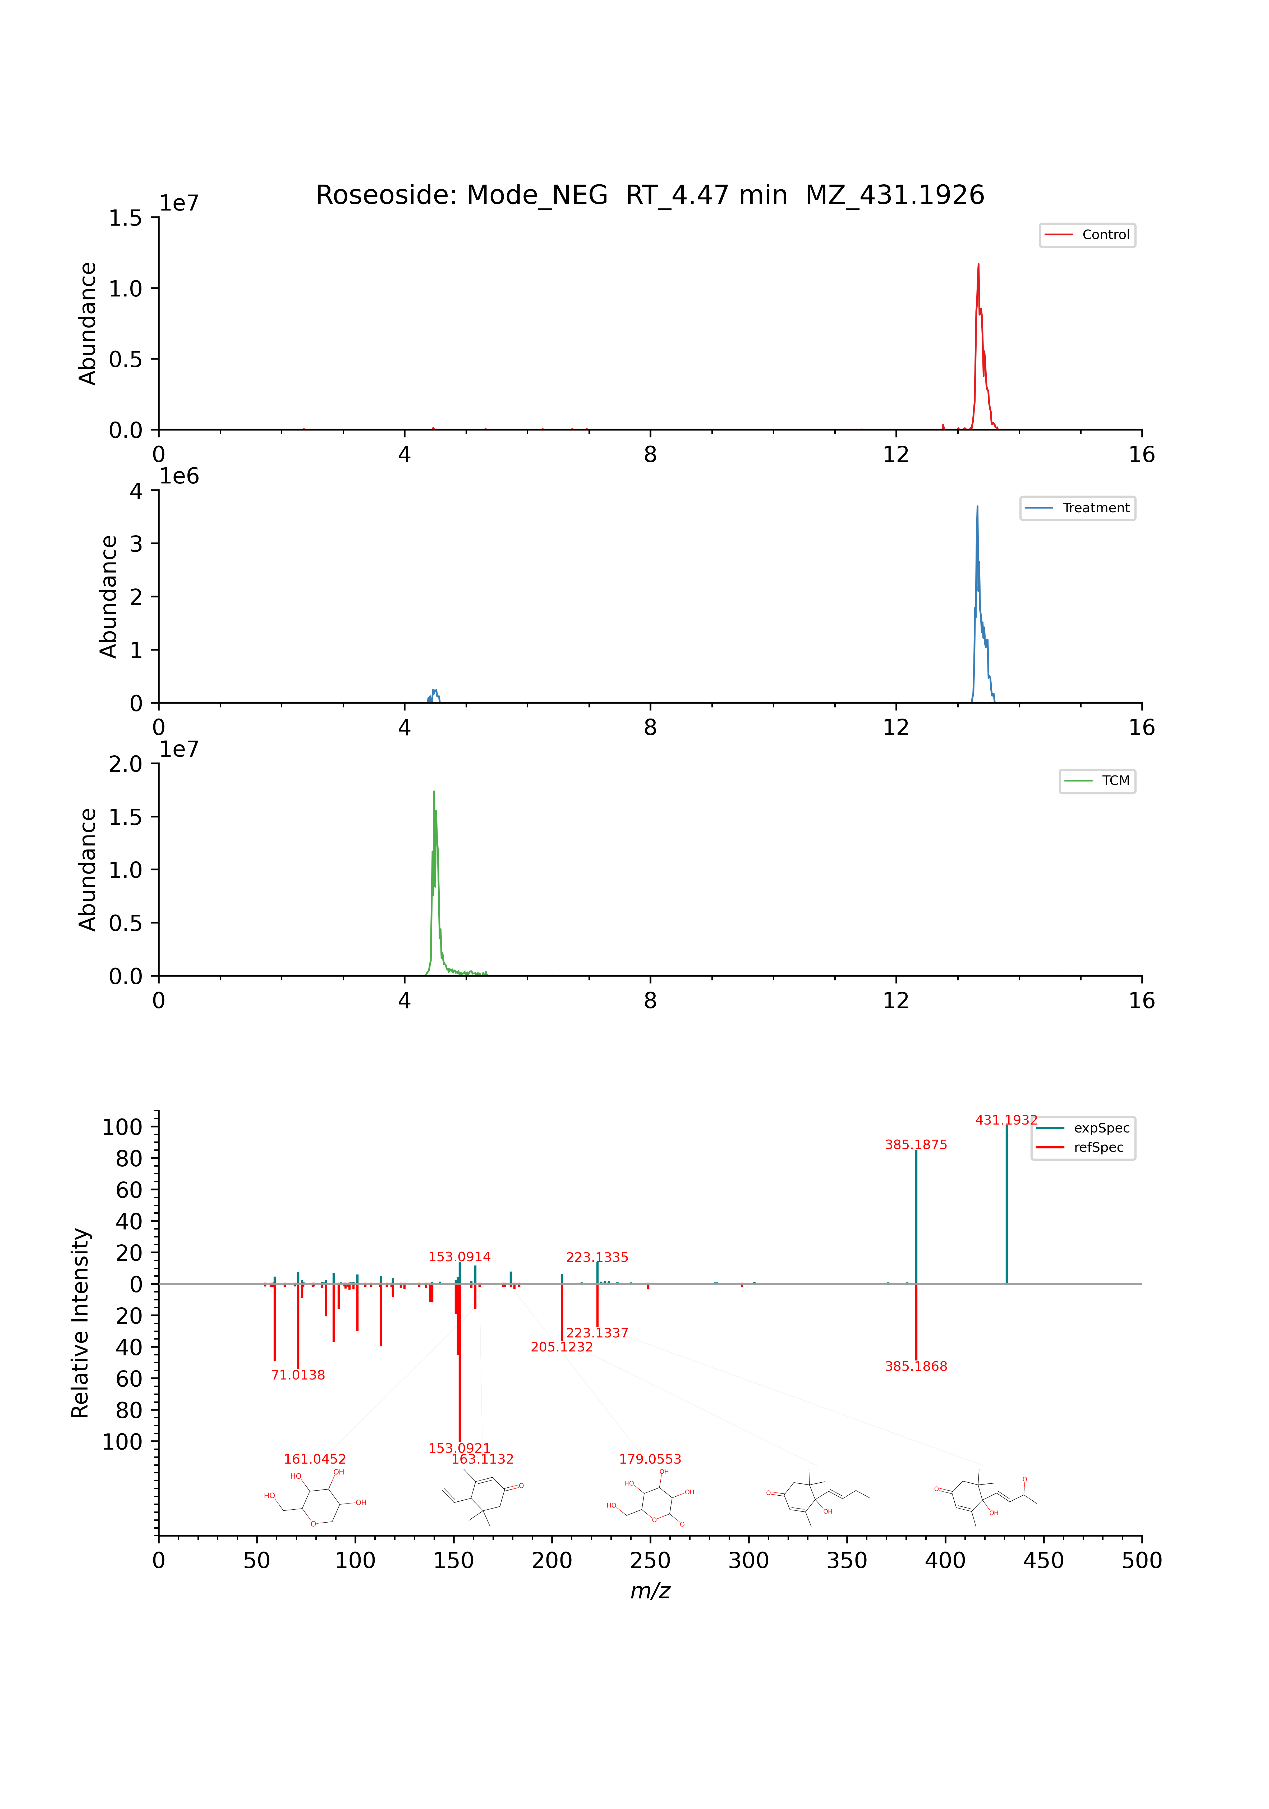


**Supplementary Figure 2.** Mass spectrometry of Roseoside and potential fragmentation pathways.


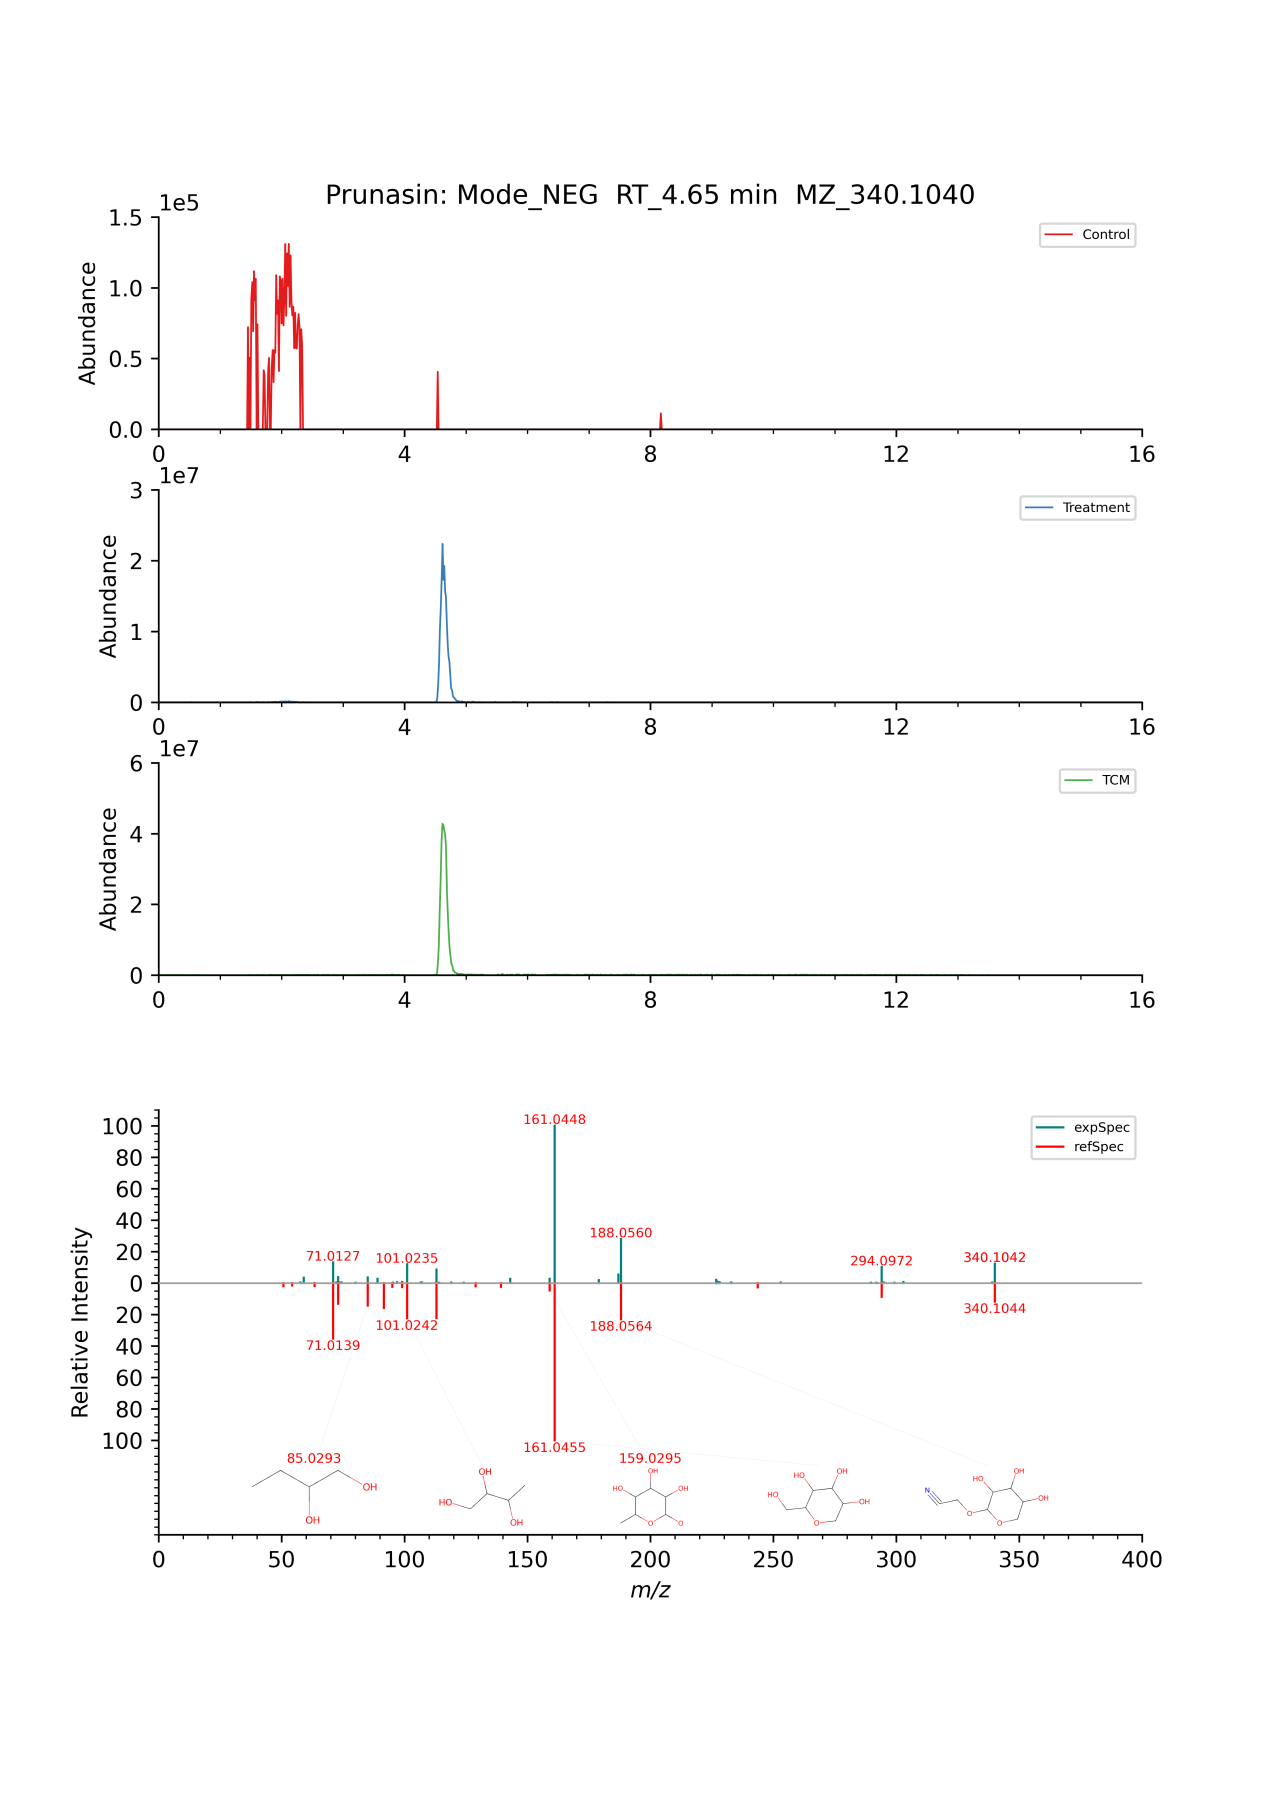
 **Supplementary Figure 3.** Mass spectrometry of Prunasin and potential fragmentation pathways.


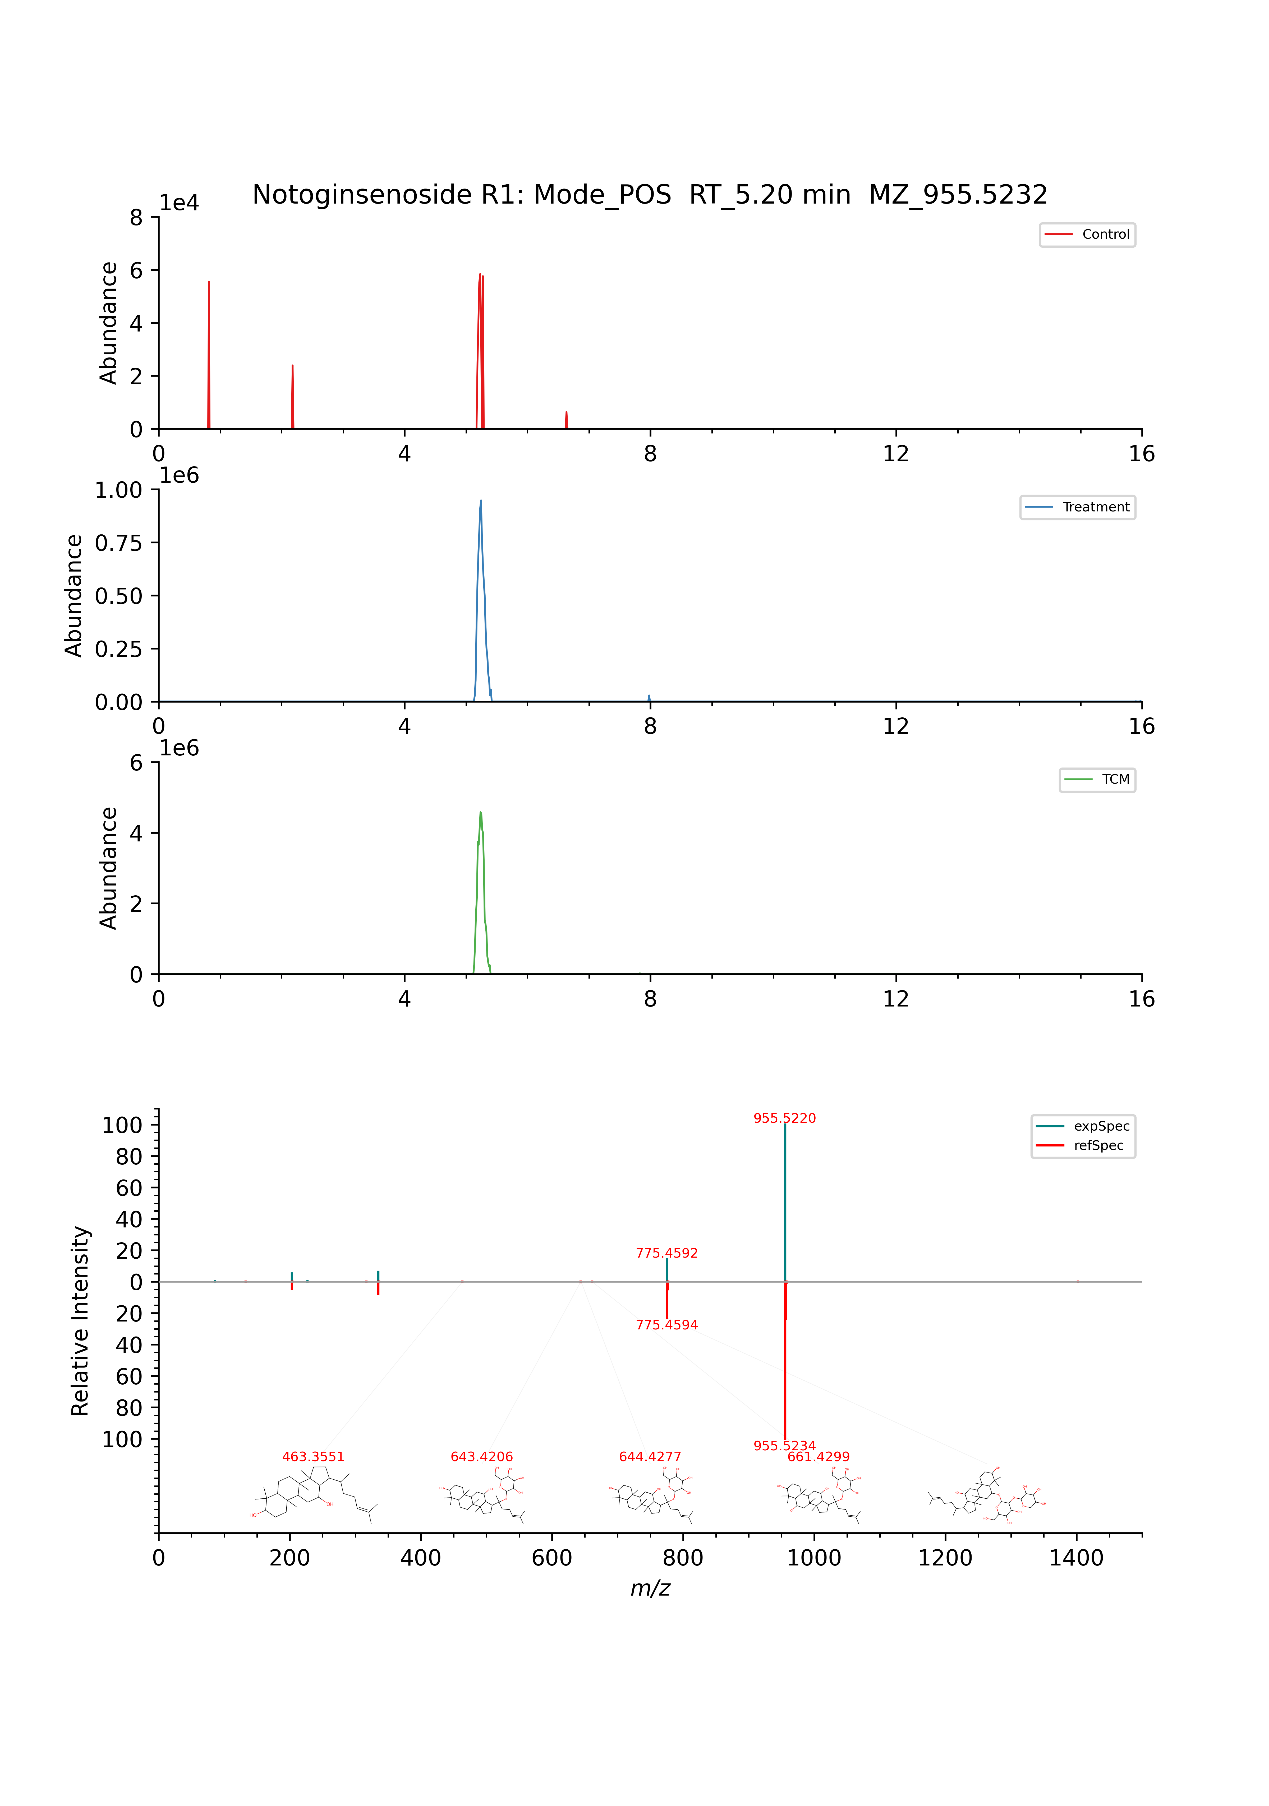


**Supplementary Figure 4.** Mass spectrometry of Notoginsenoside R1 and potential fragmentation pathways.


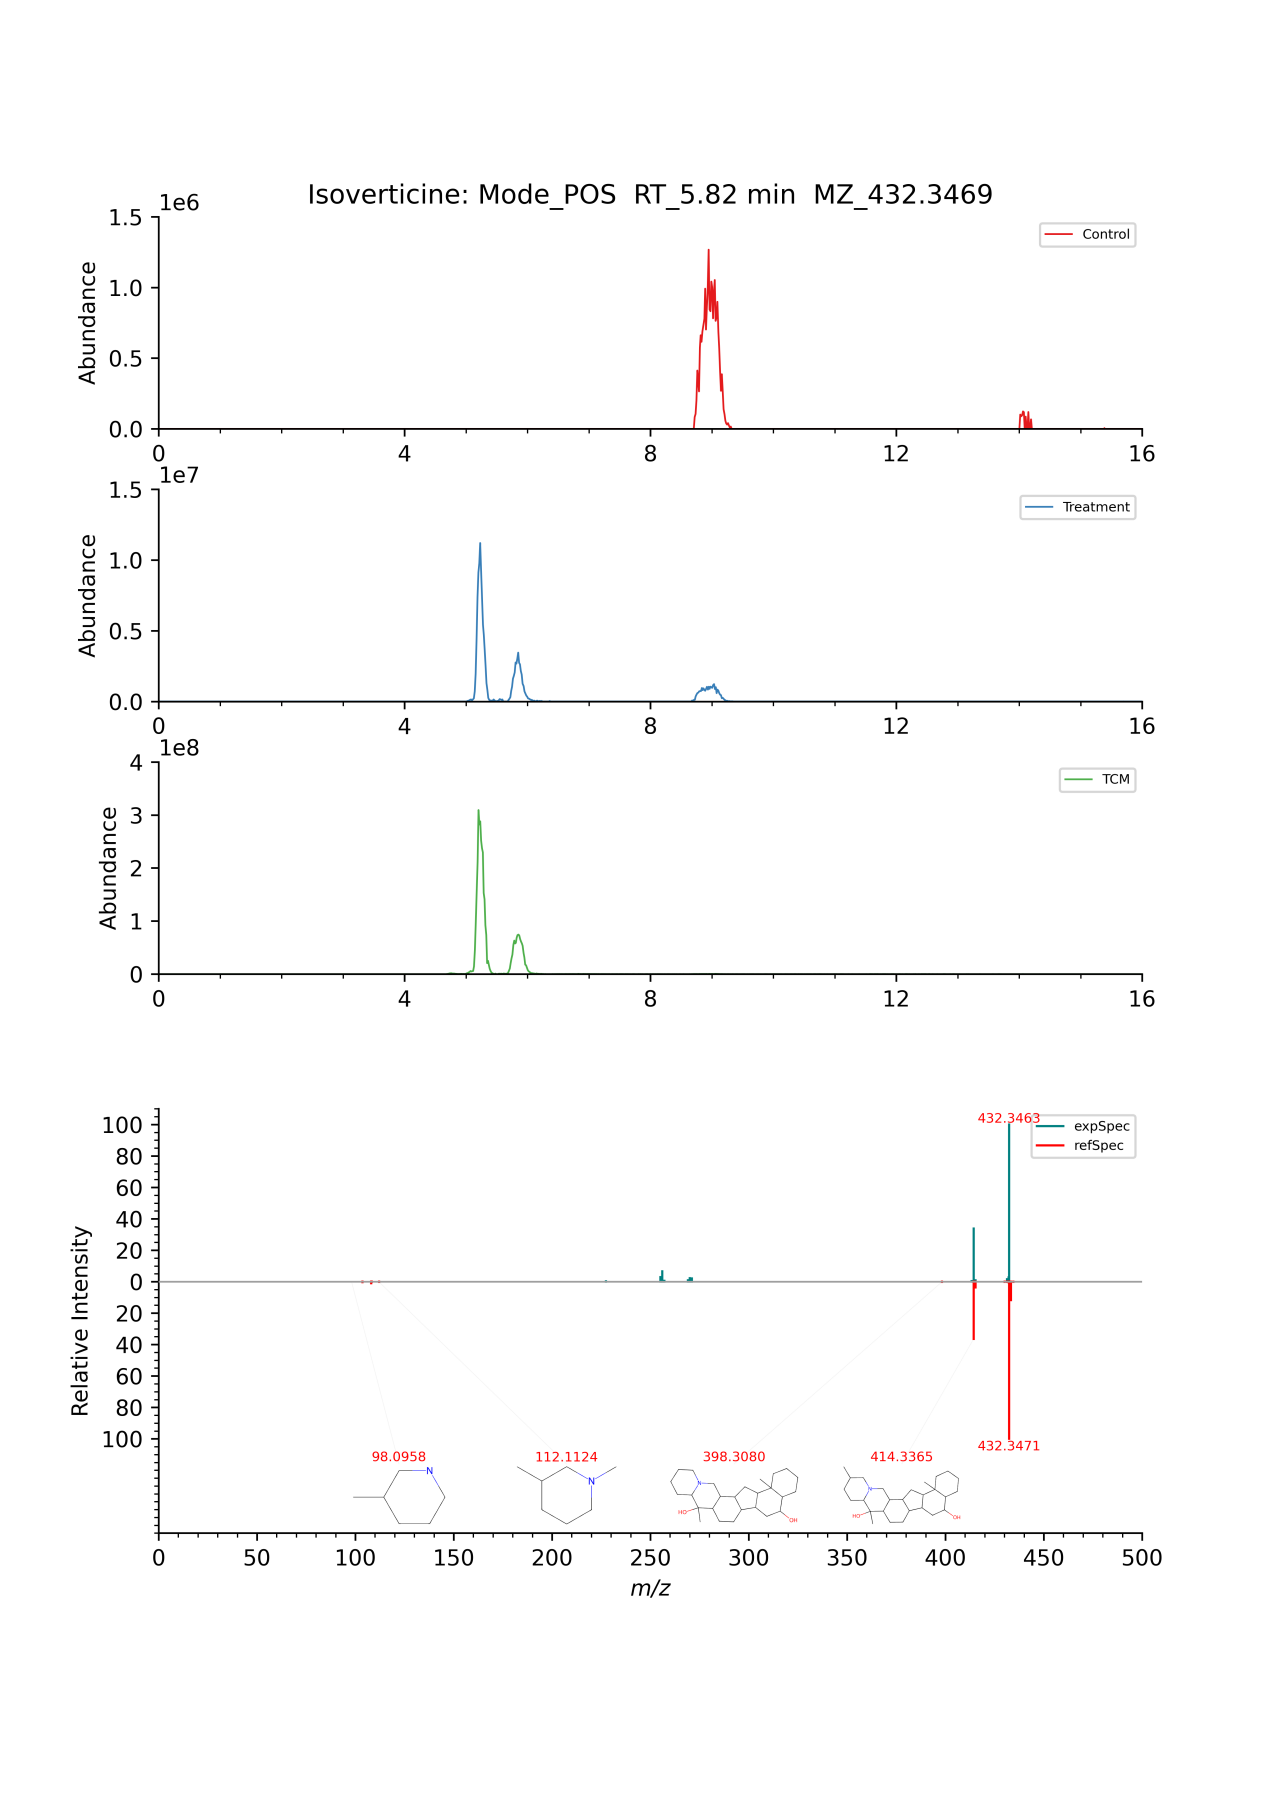


**Supplementary Figure 5.** Mass spectrometry of Isoverticine and potential fragmentation pathways.


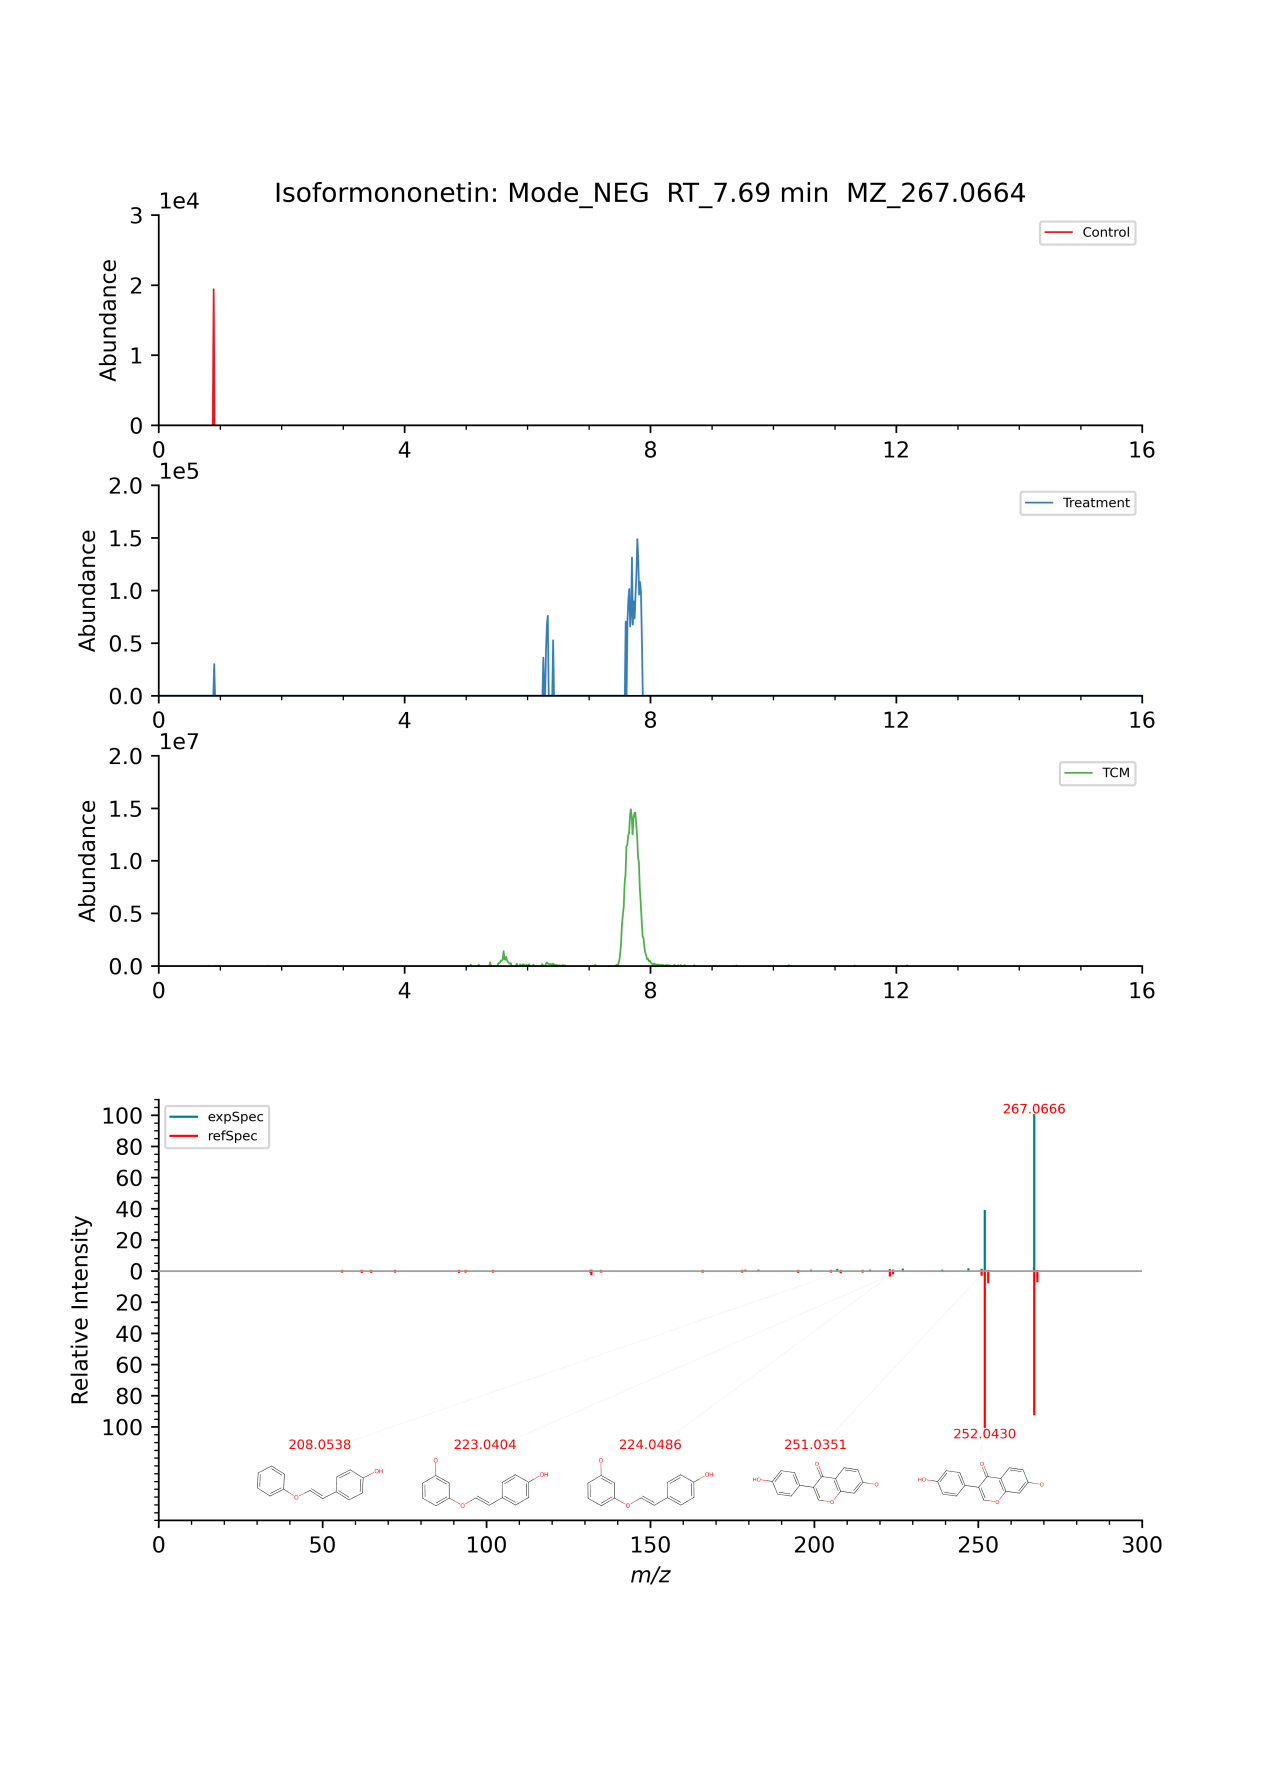


**Supplementary Figure 6.** Mass spectrometry of Isoformononetin and potential fragmentation pathways.


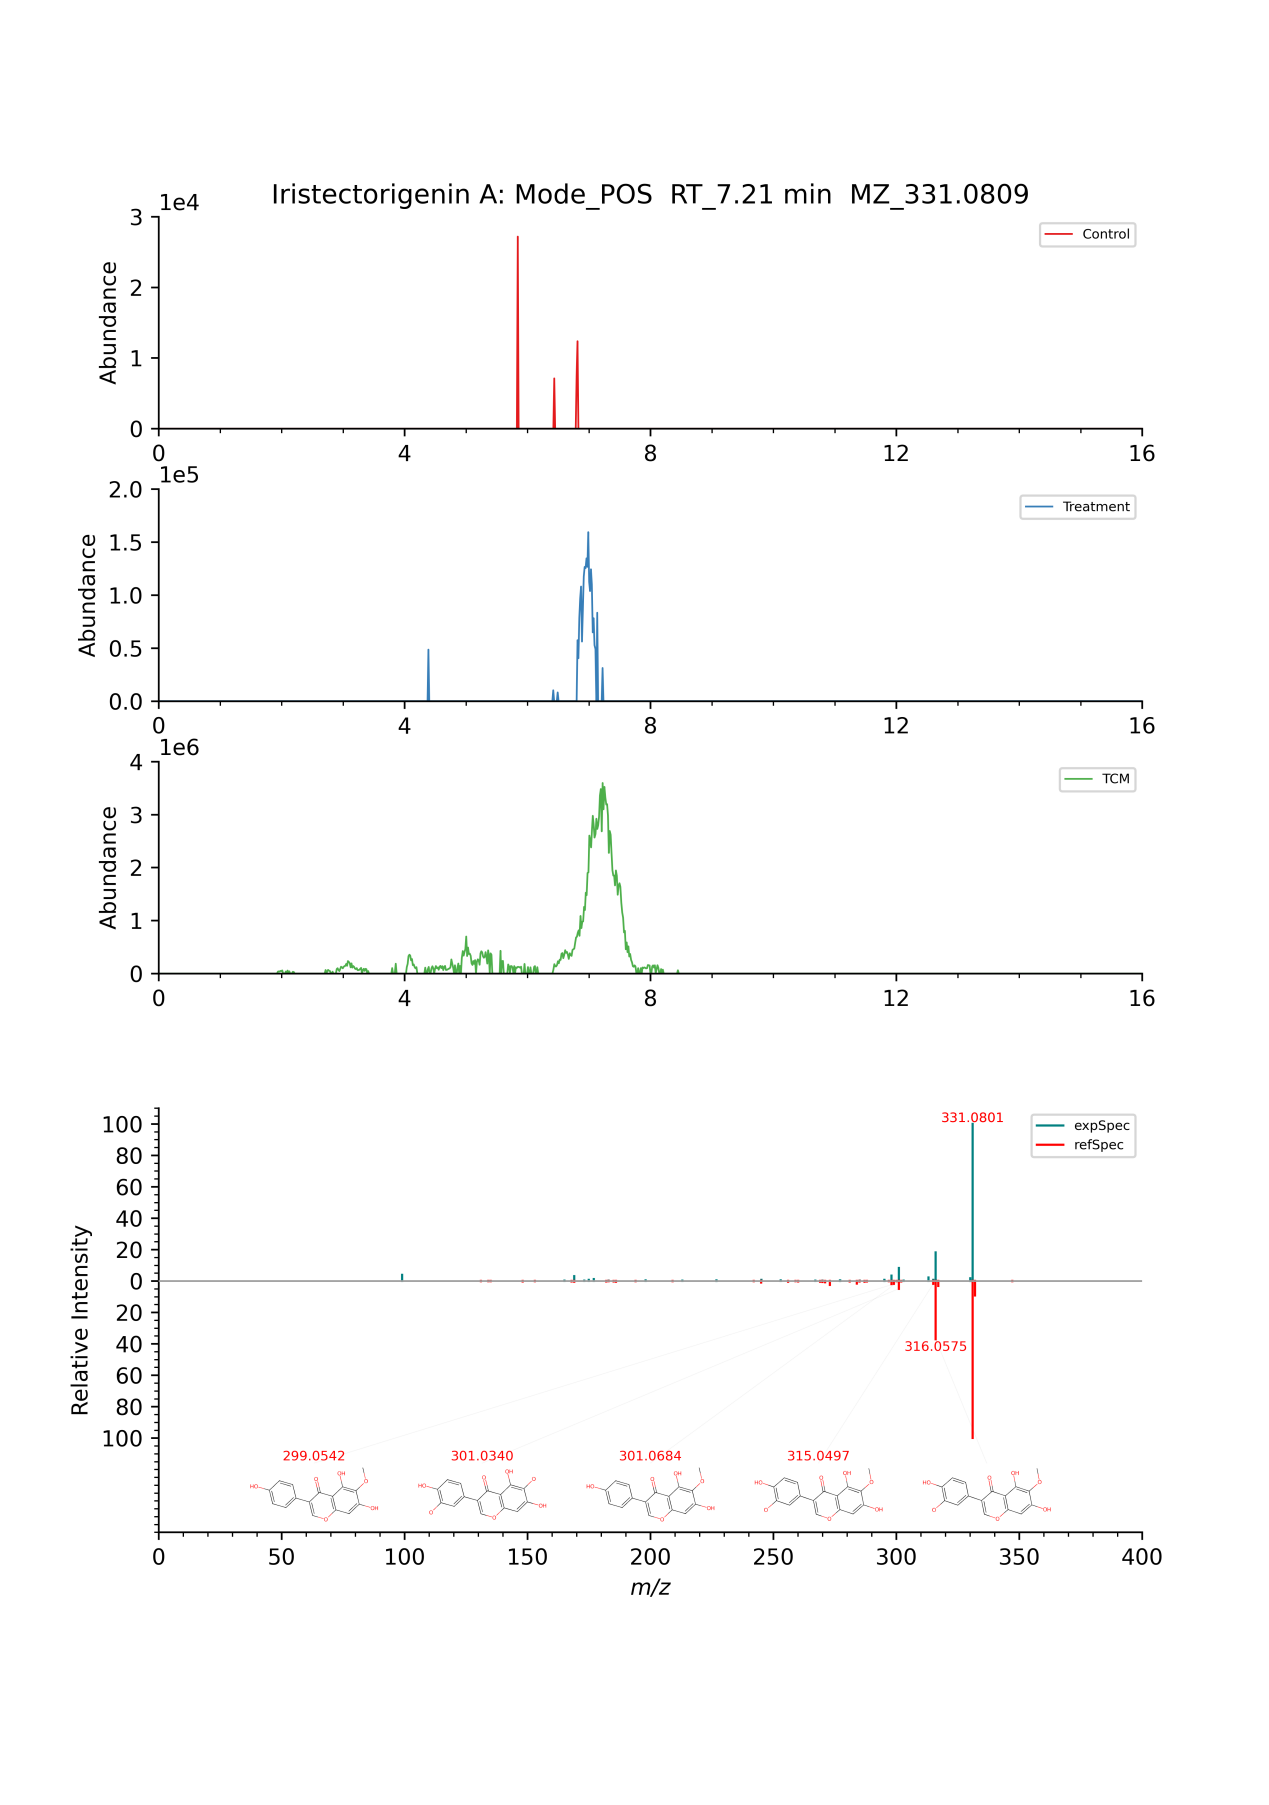


**Supplementary Figure 7.** Mass spectrometry of Iristectorigenin A and potential fragmentation pathways.


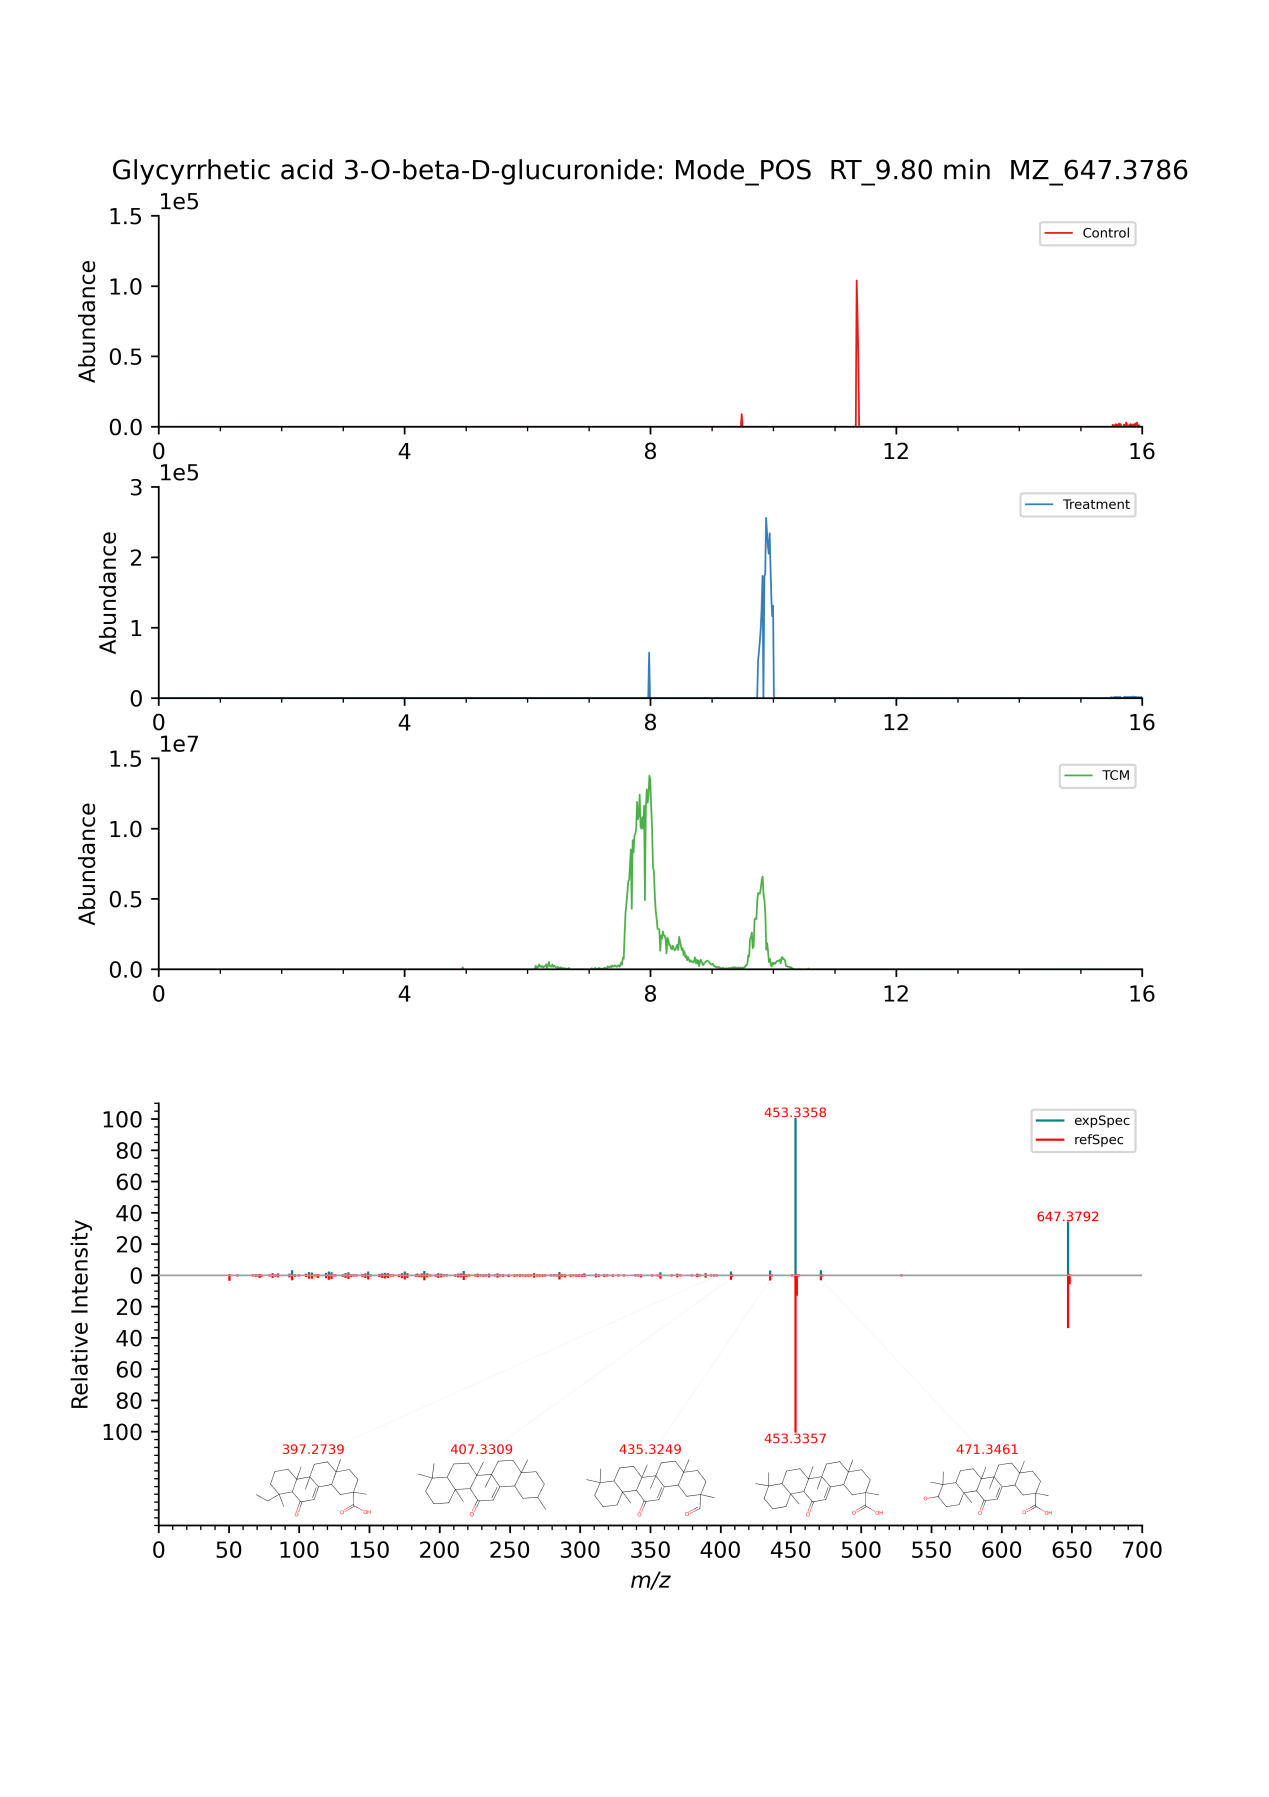


**Supplementary Figure 8.** Mass spectrometry of Glycyrrhetic acid 3-O-beta-D-glucuronide and potential fragmentation pathways.


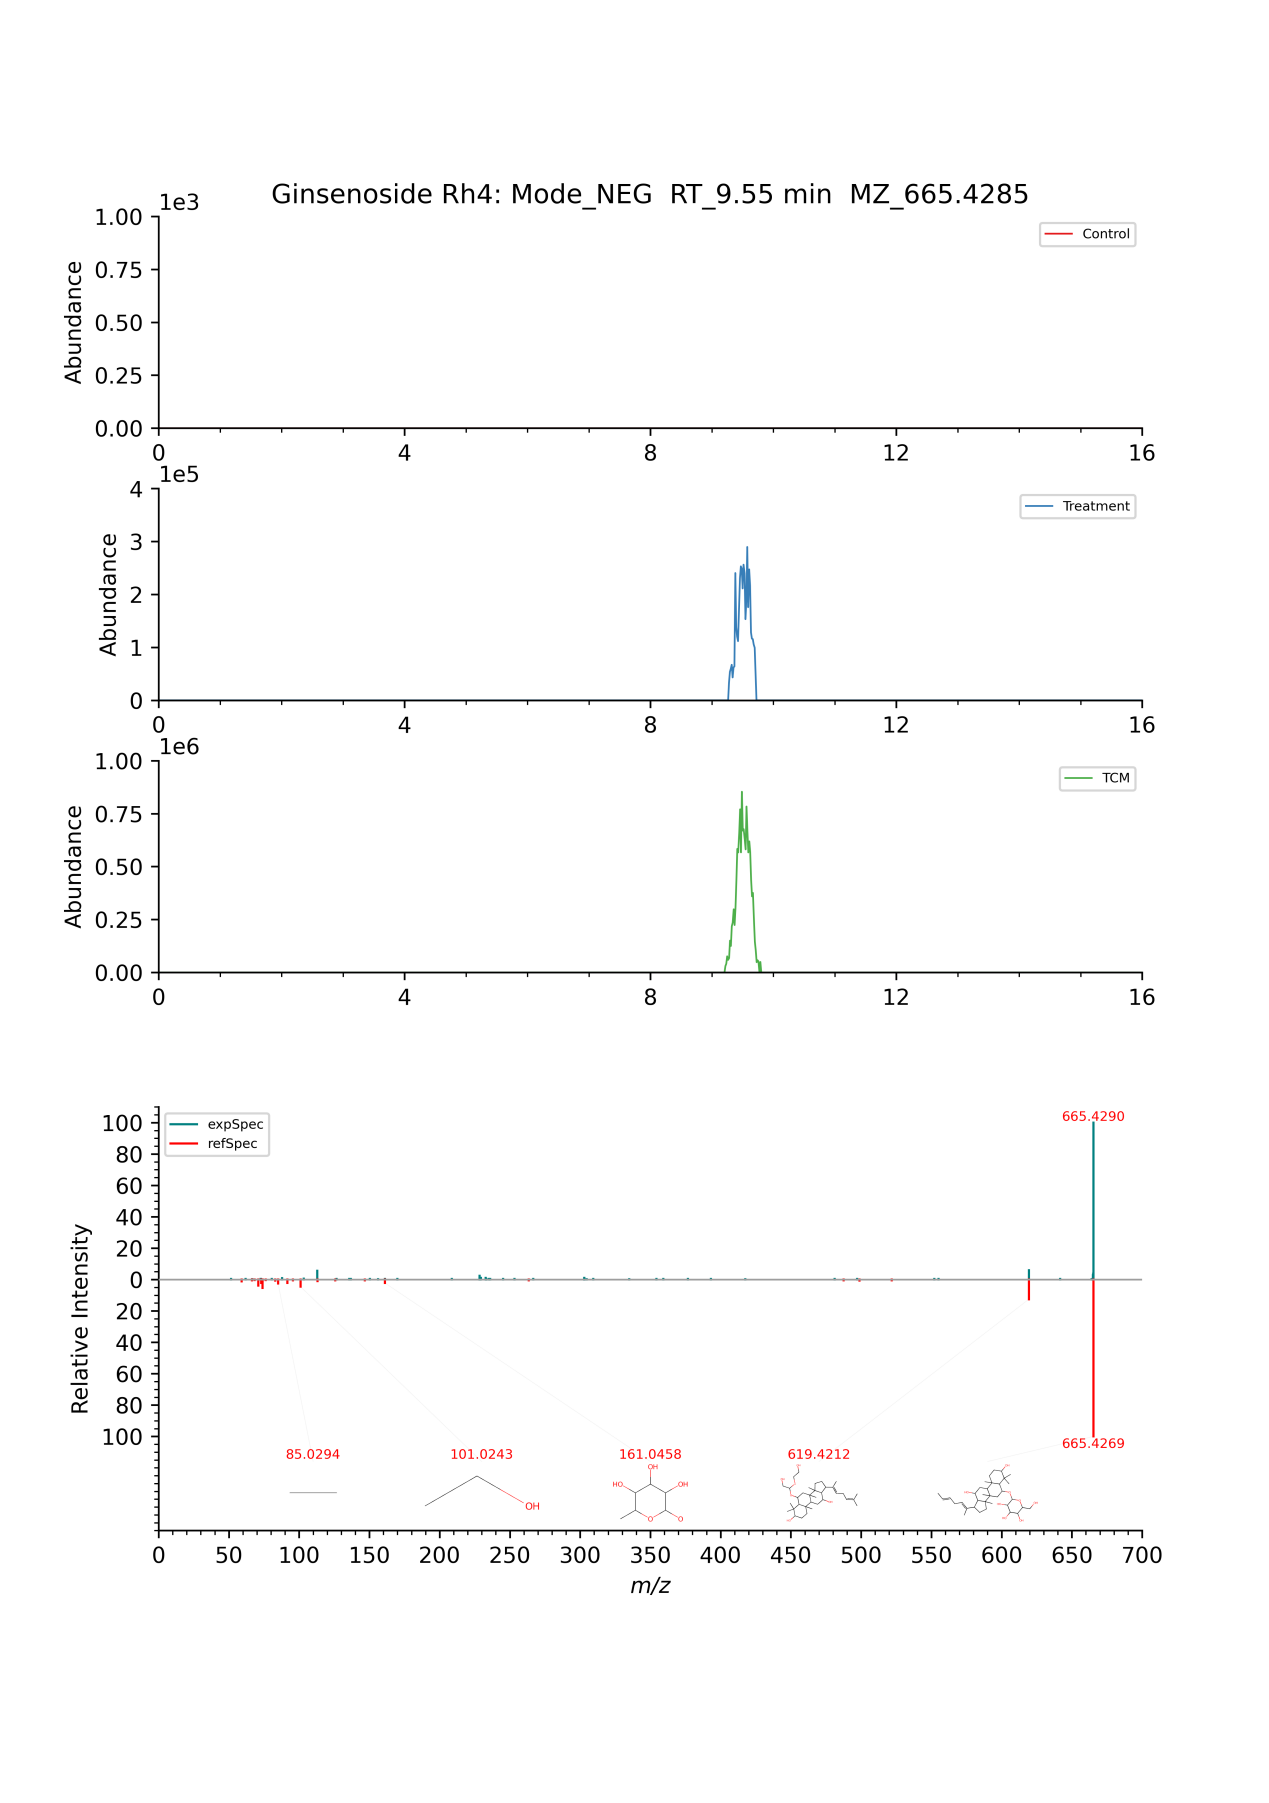


**Supplementary Figure 9.** Mass spectrometry of Ginsenoside Rh4 and potential fragmentation pathways.


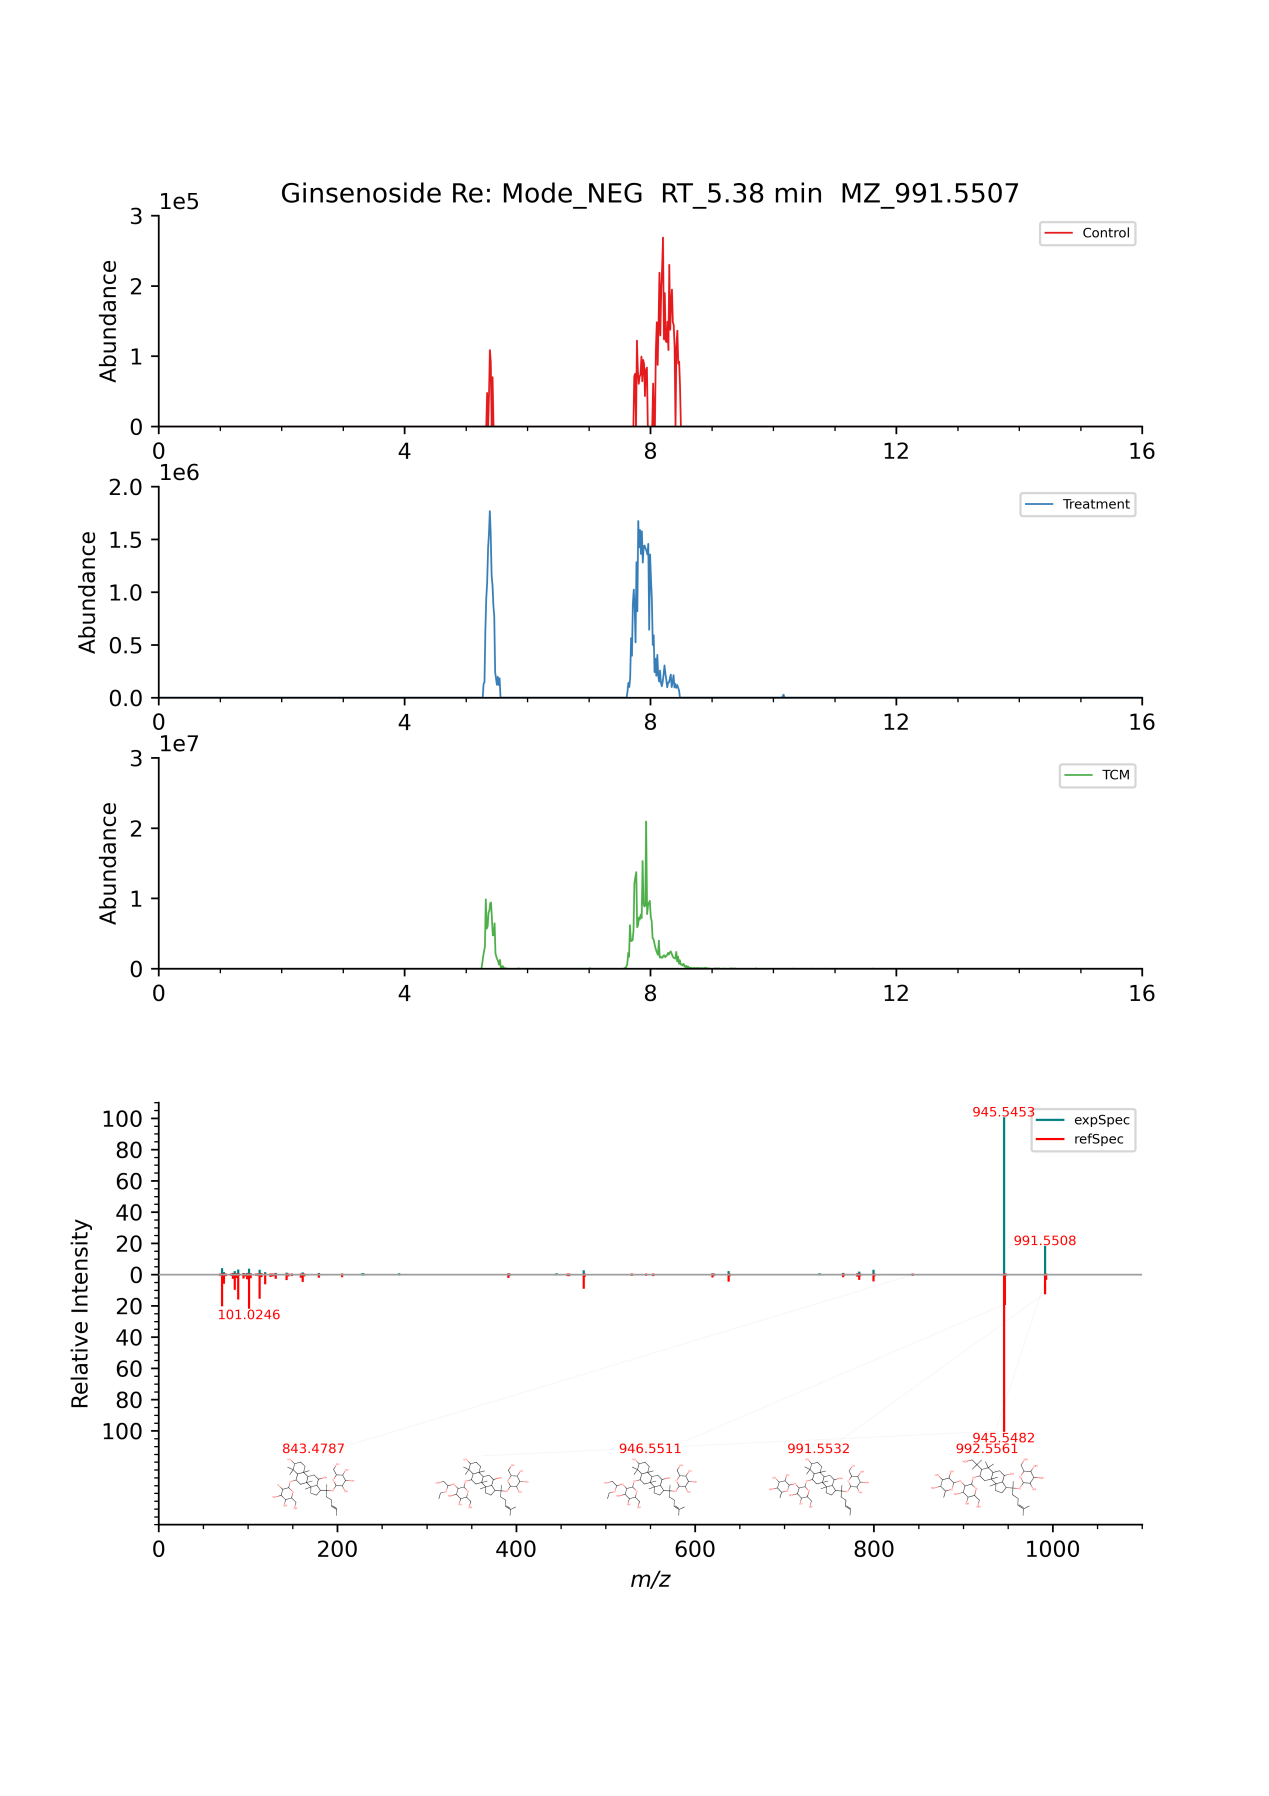


**Supplementary Figure 10.** Mass spectrometry of Ginsenoside Re and potential fragmentation pathways.


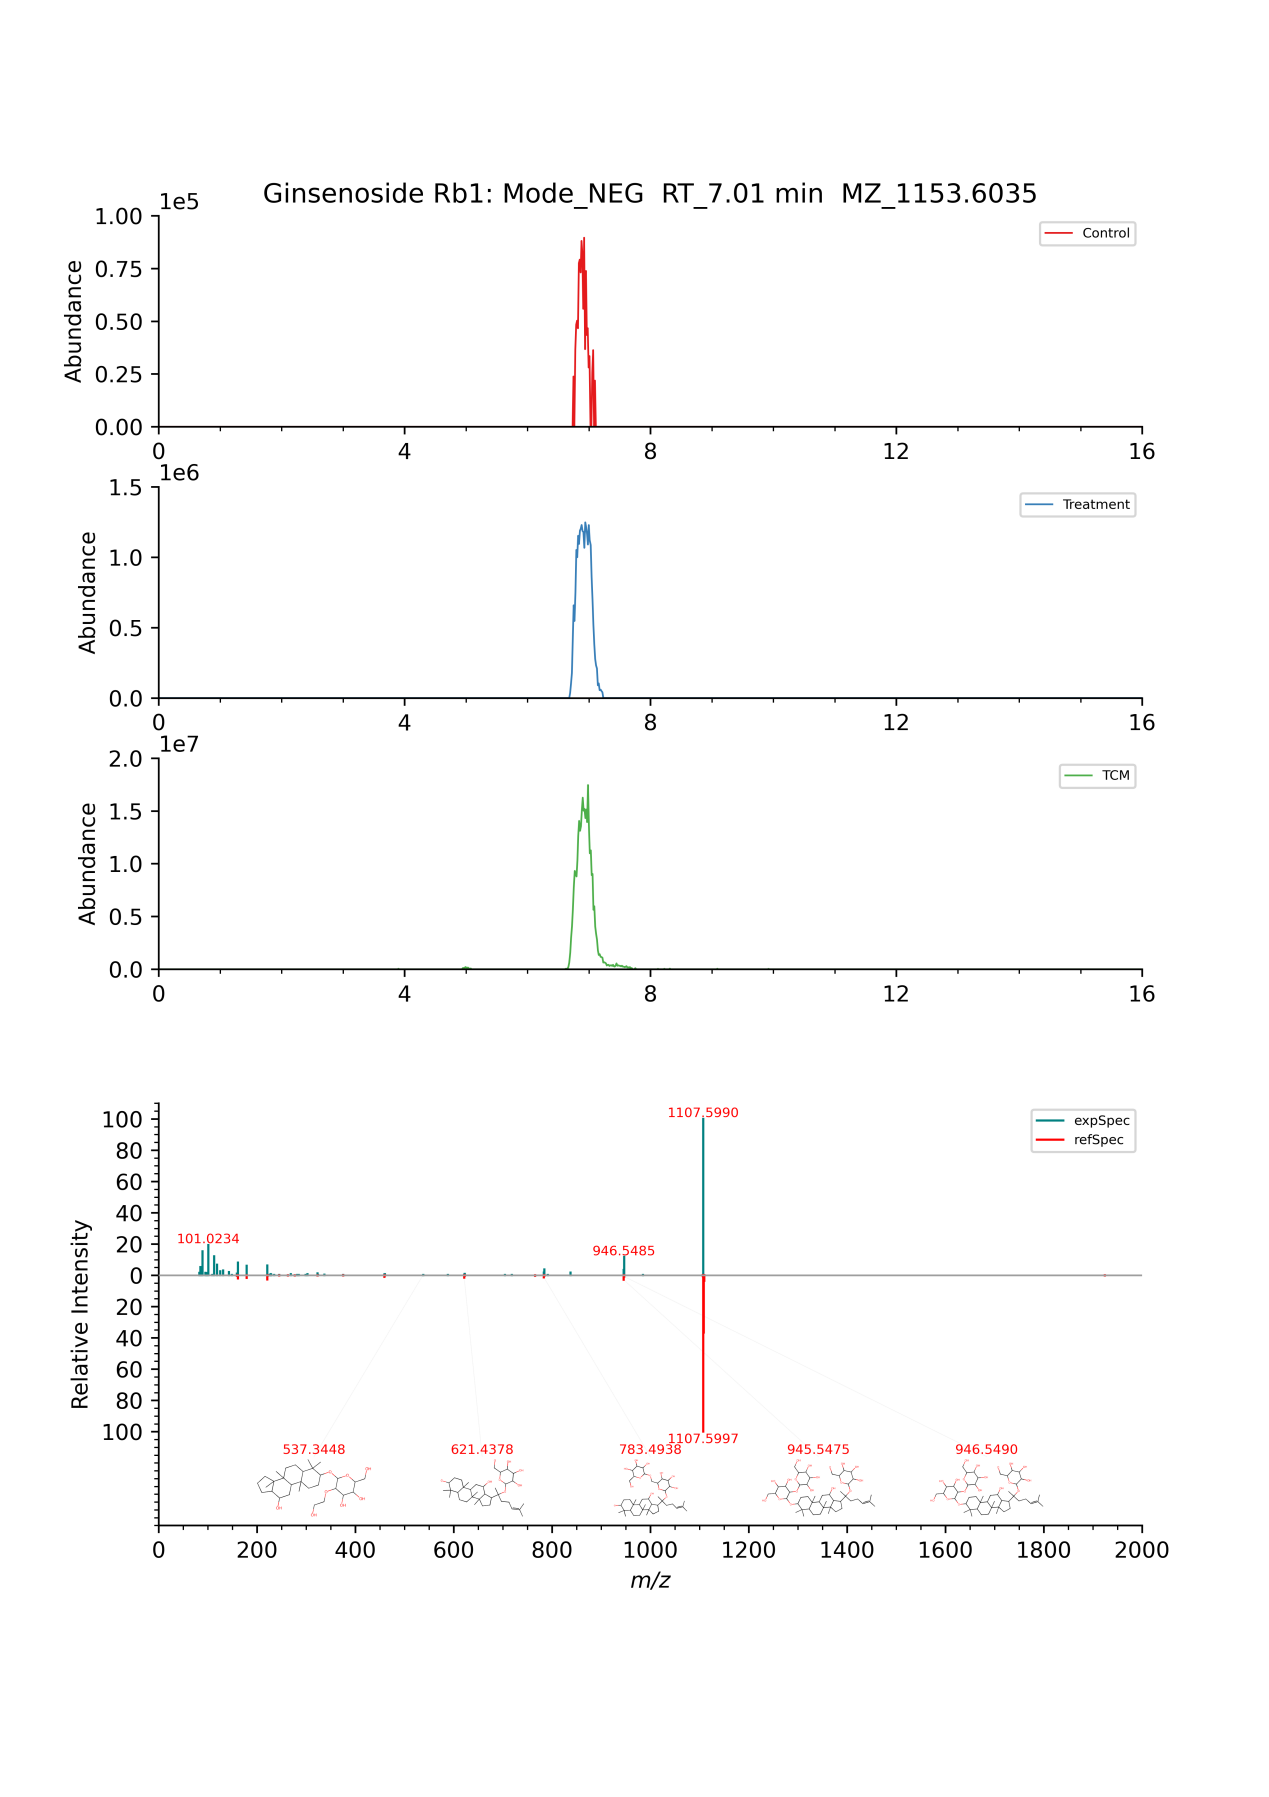


**Supplementary Figure 11.** Mass spectrometry of Ginsenoside Rb1 and potential fragmentation pathways.


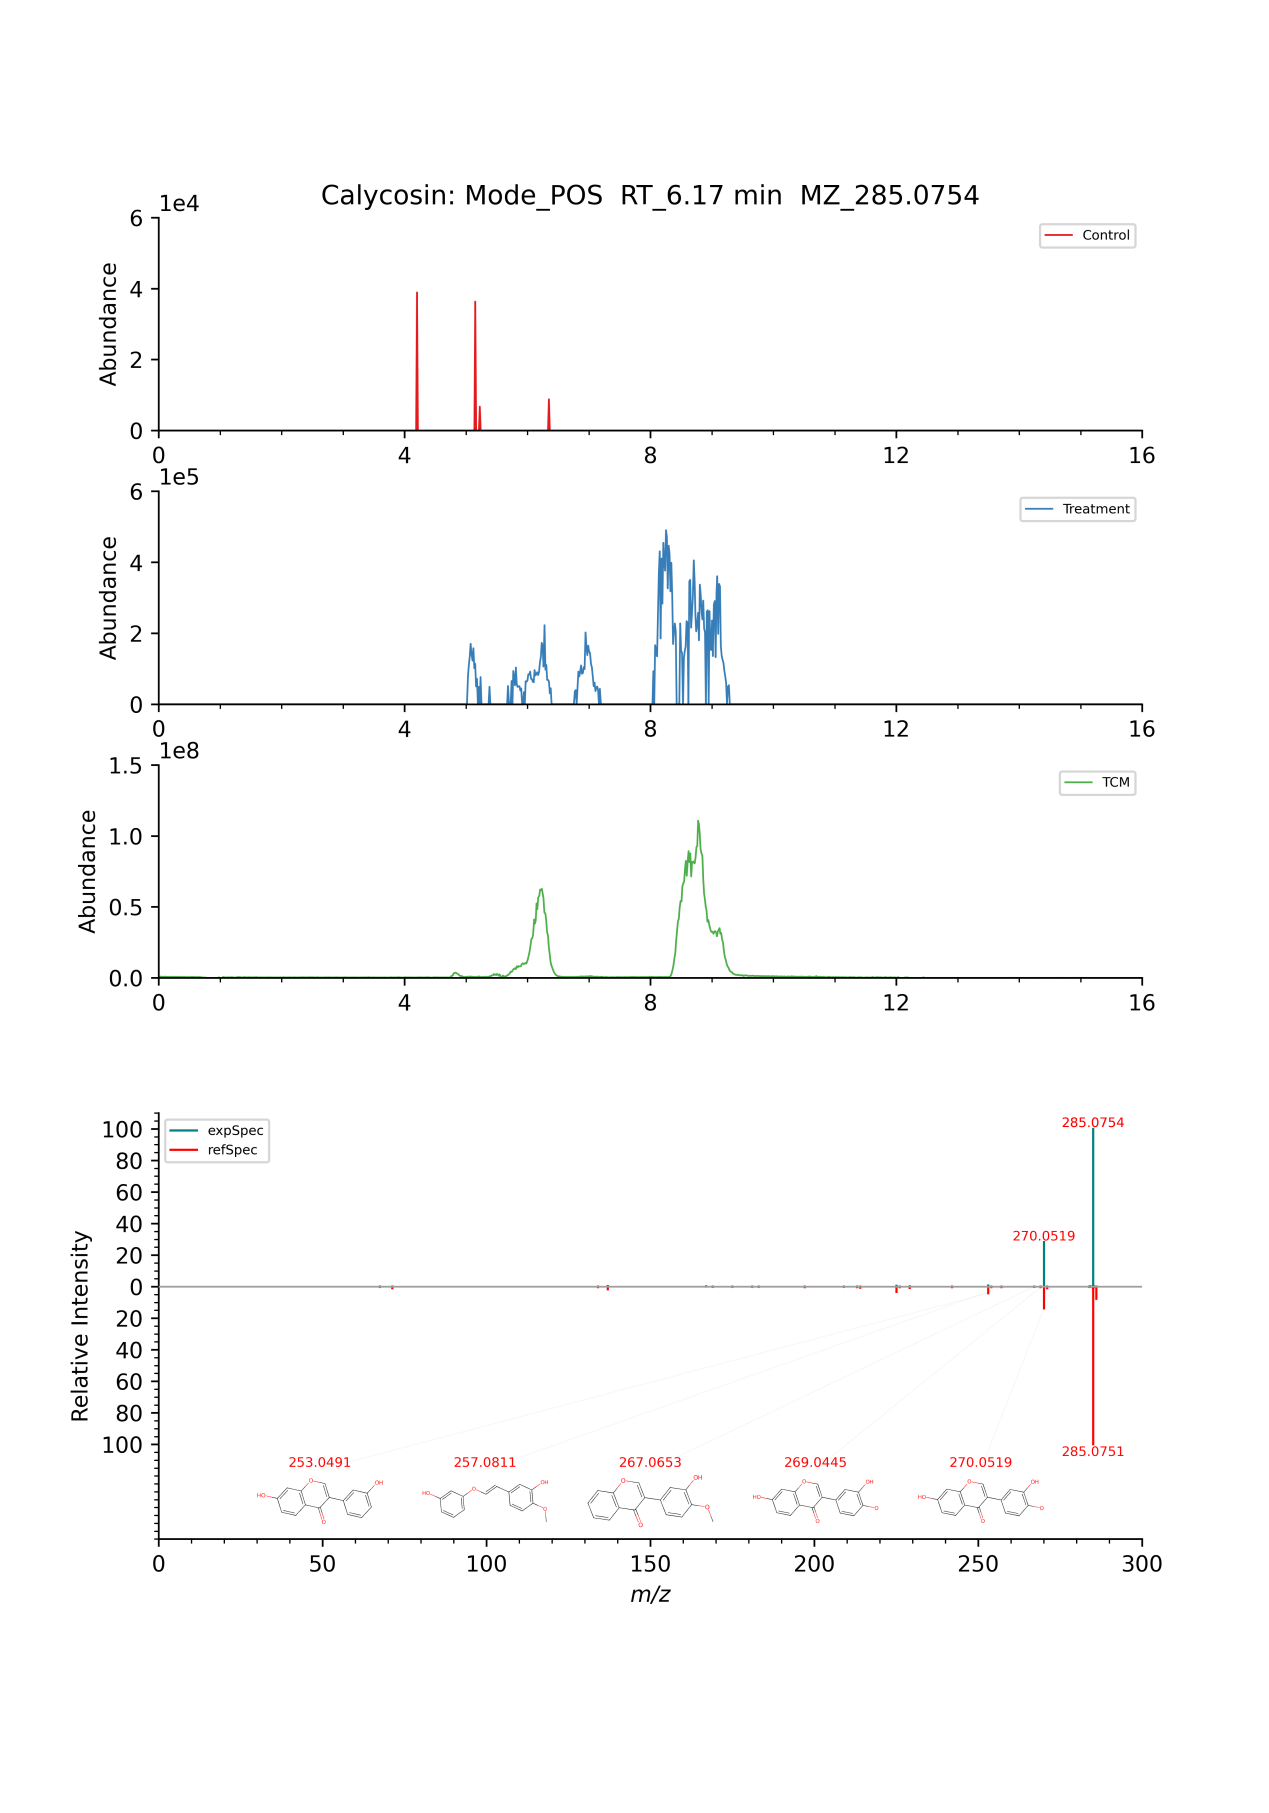


**Supplementary Figure 12.** Mass spectrometry of Calycosin and potential fragmentation pathways.


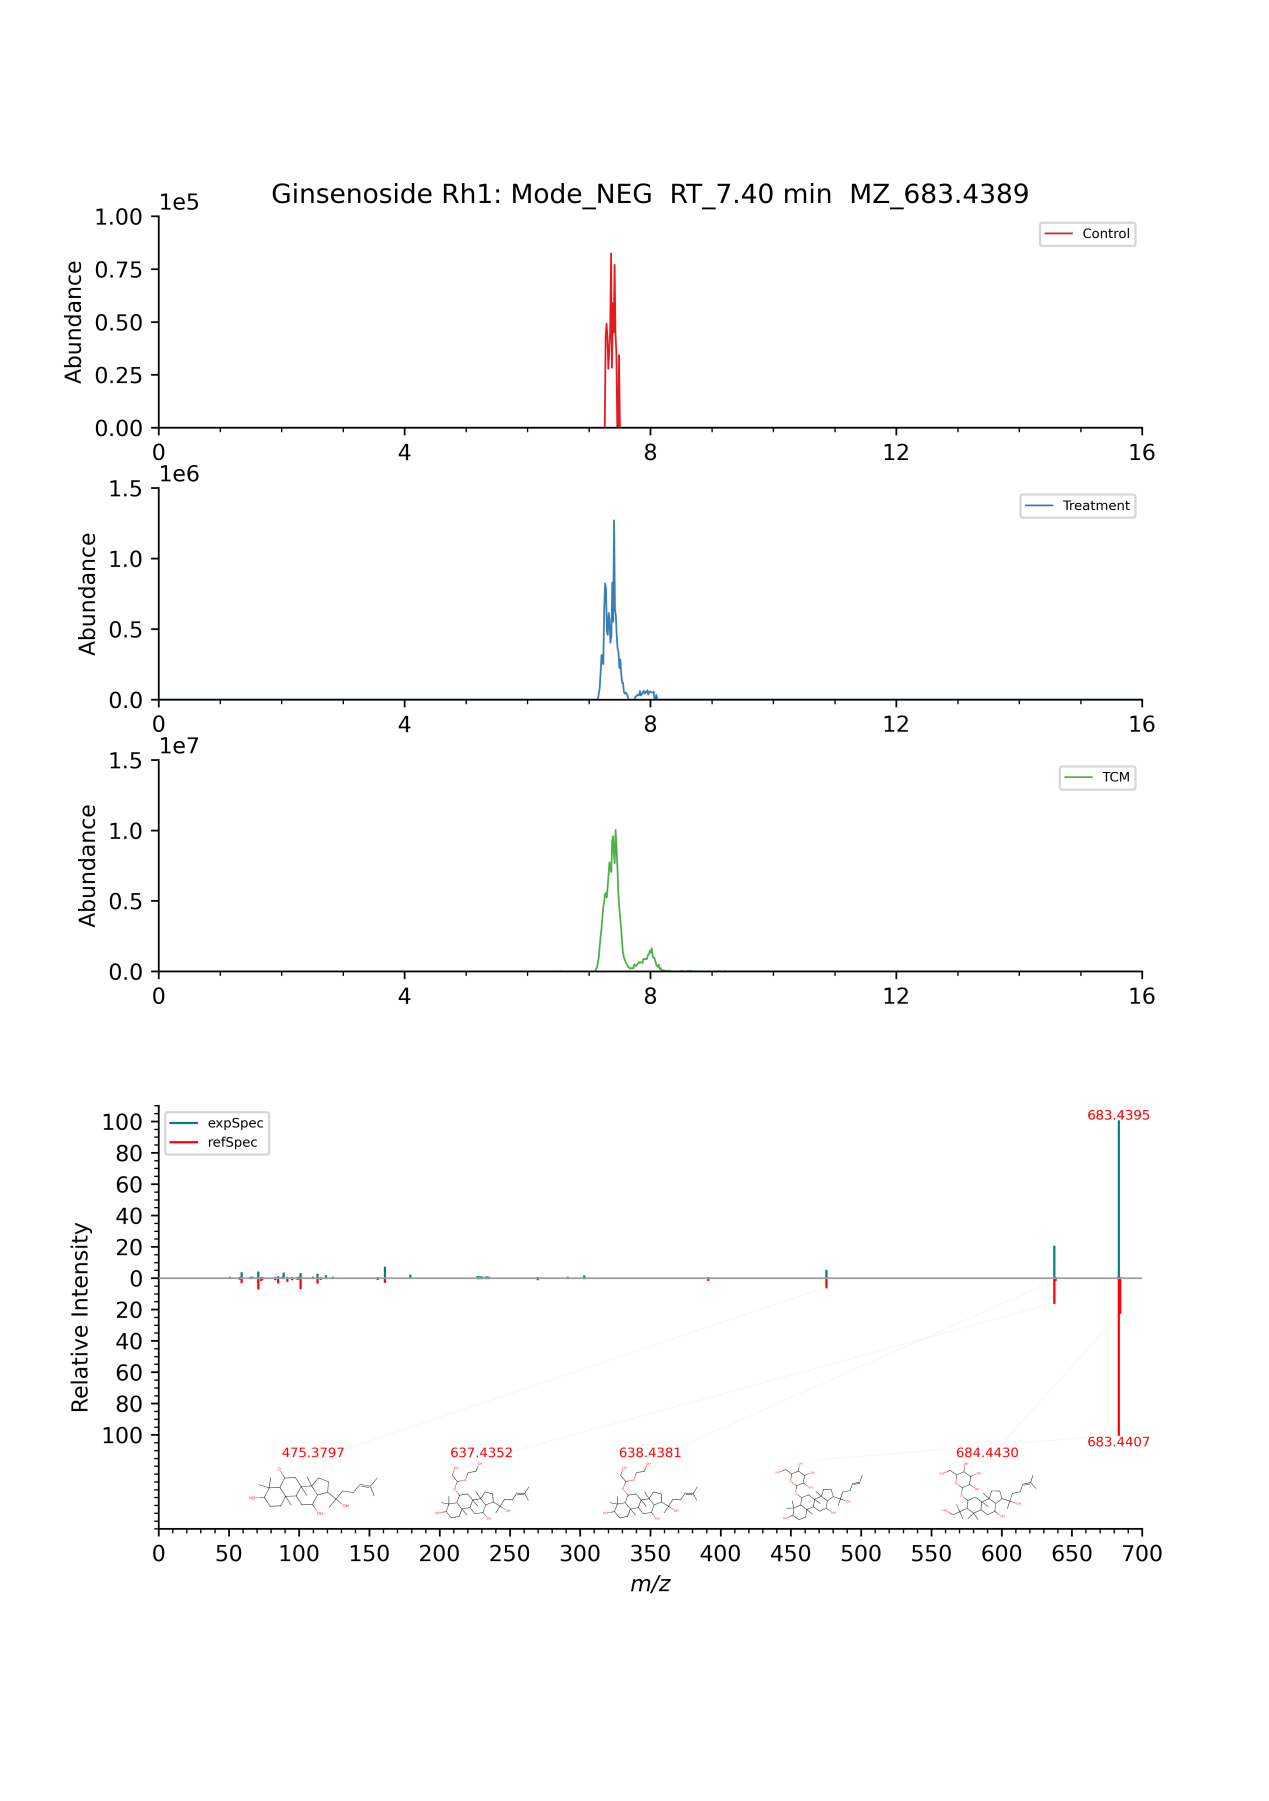


**Supplementary Figure 13.** Mass spectrometry of Ginsenoside Rh1 and potential fragmentation pathways.


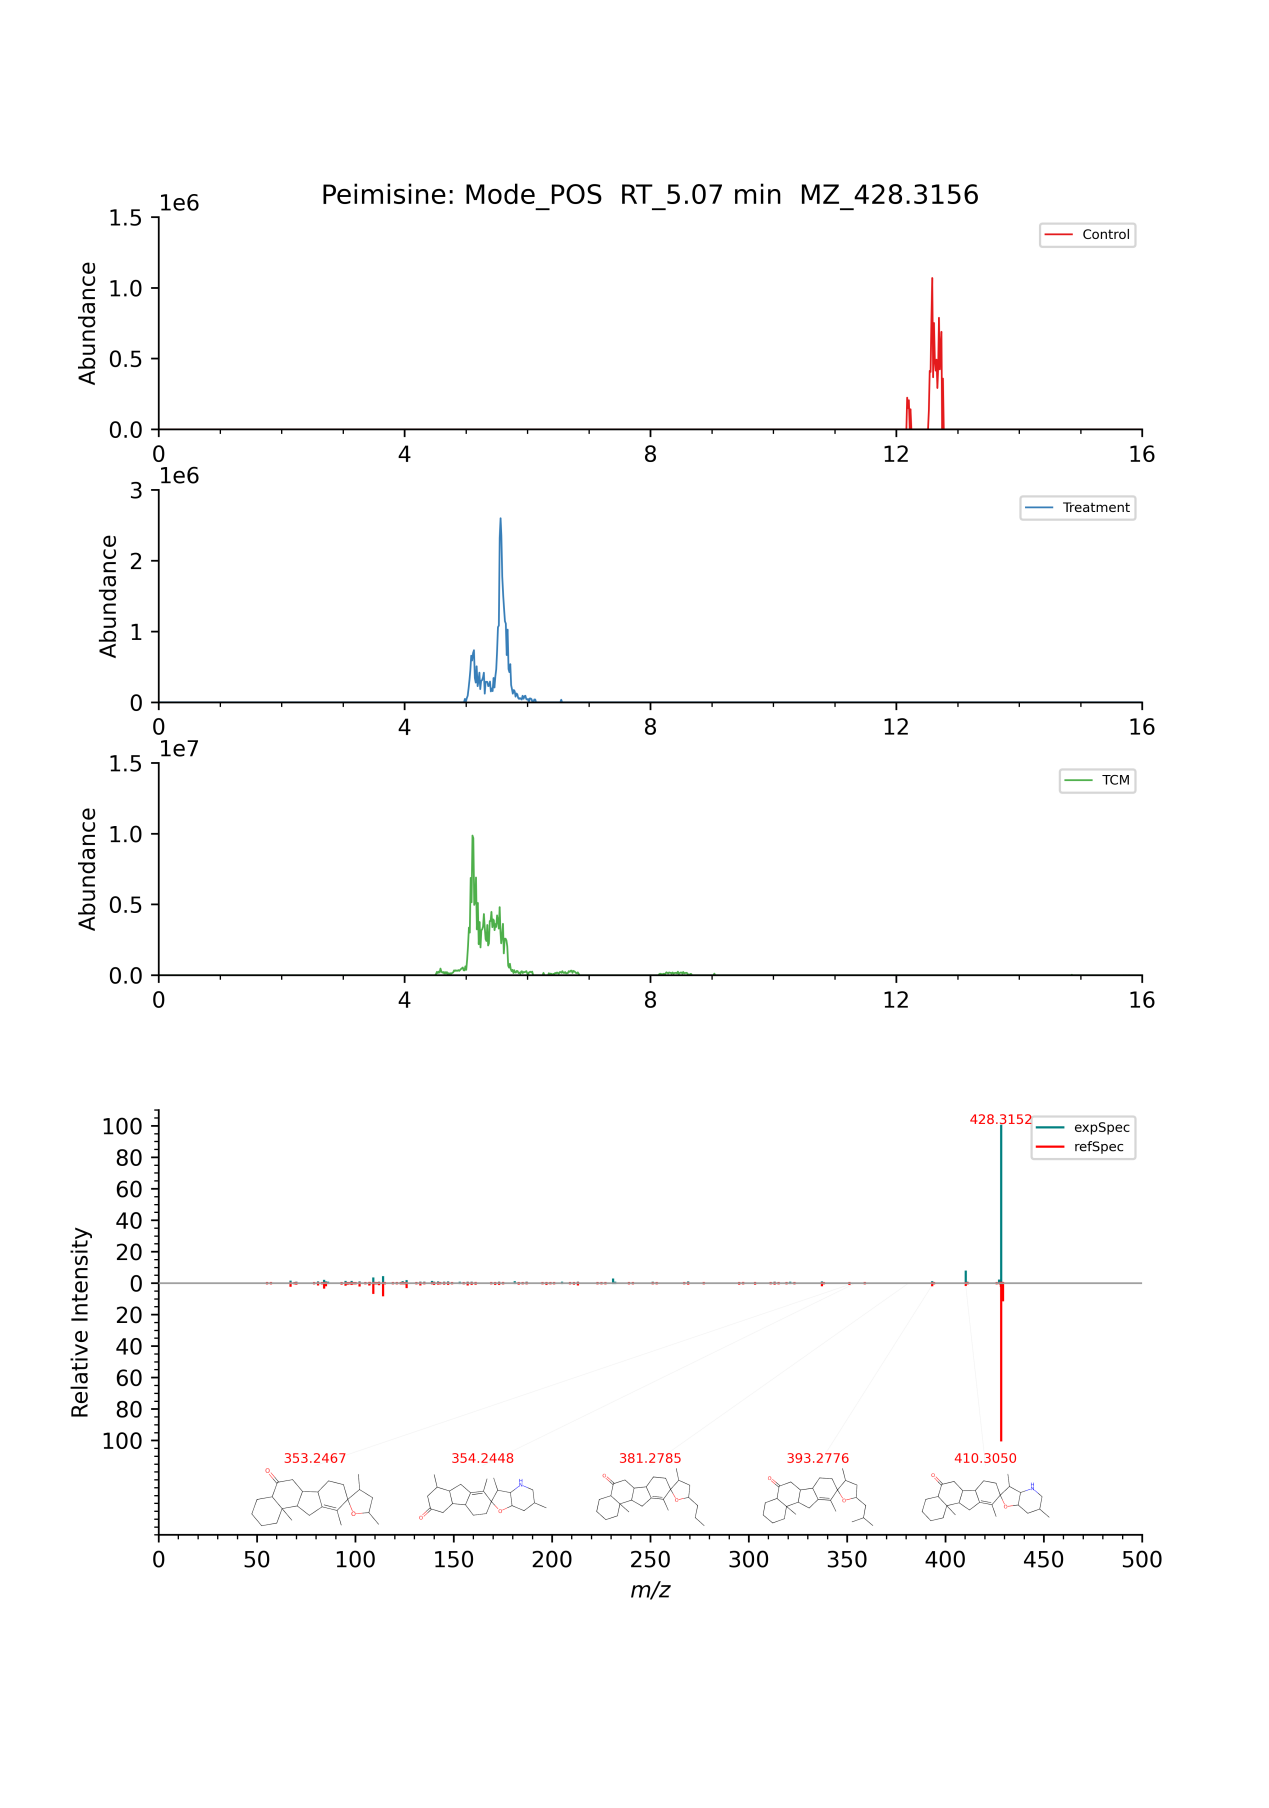


**Supplementary Figure 14.** Mass spectrometry of Peimisine and potential fragmentation pathways.


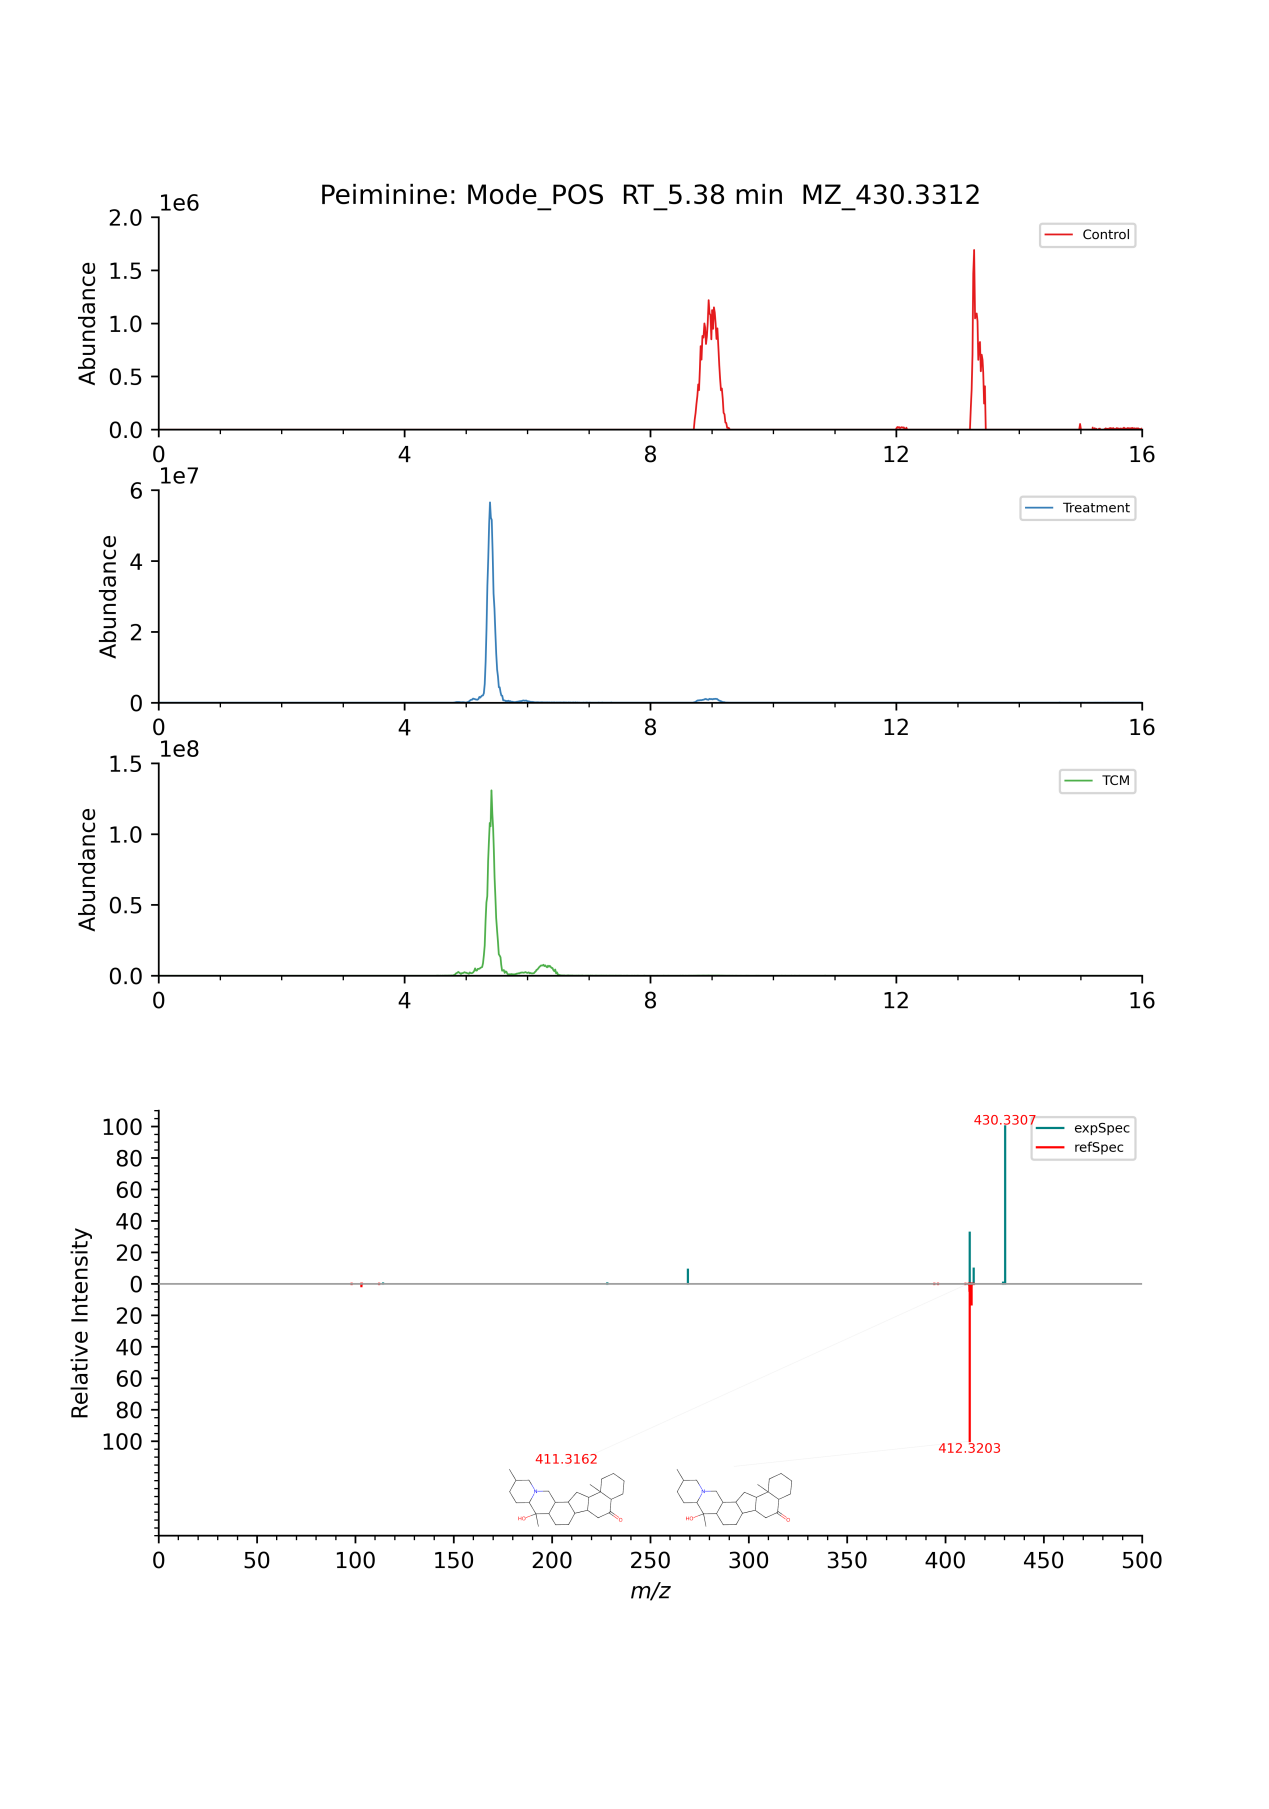


**Supplementary Figure 15.** Mass spectrometry of Peiminine and potential fragmentation pathways.


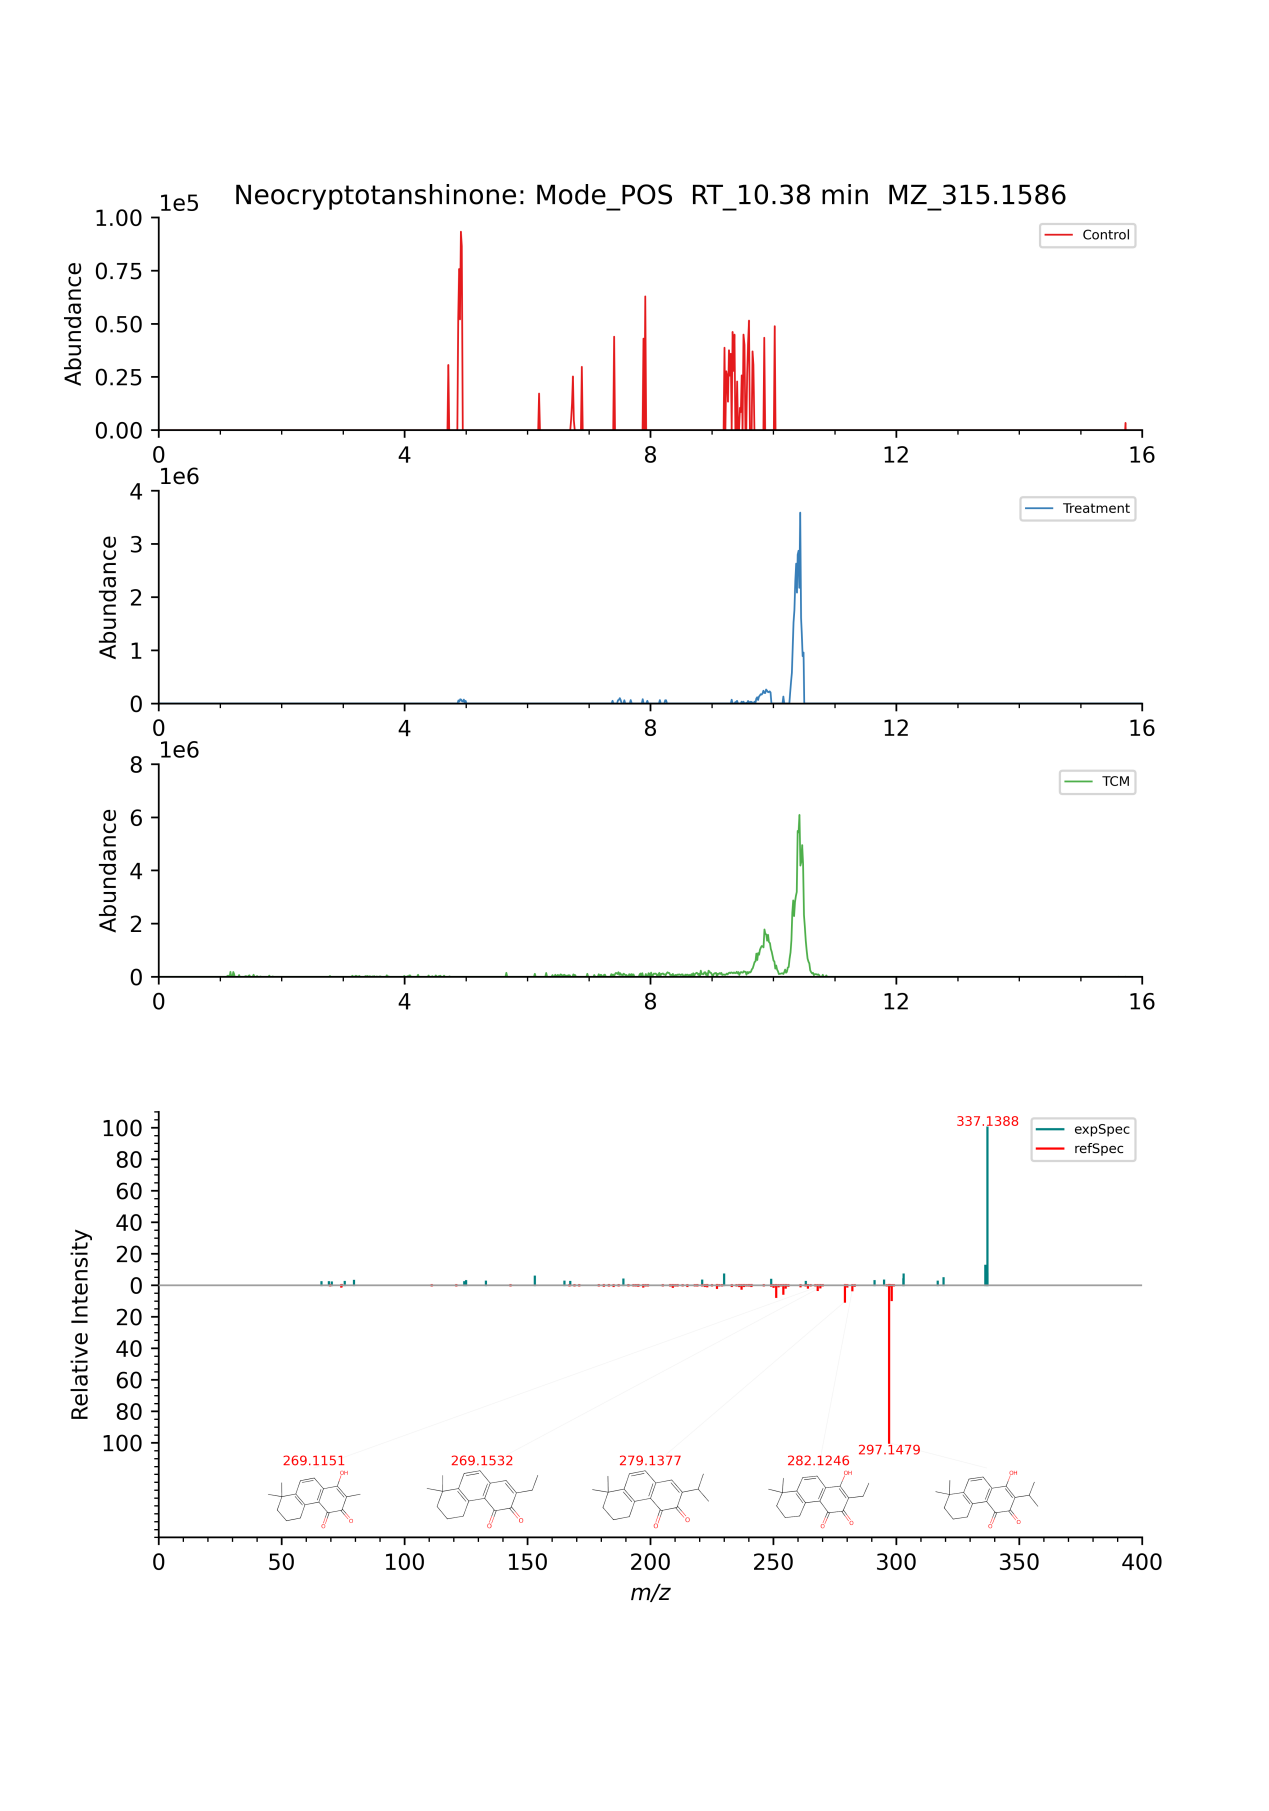


**Supplementary Figure 16.** Mass spectrometry of Neocryptotanshinone and potential fragmentation pathways.


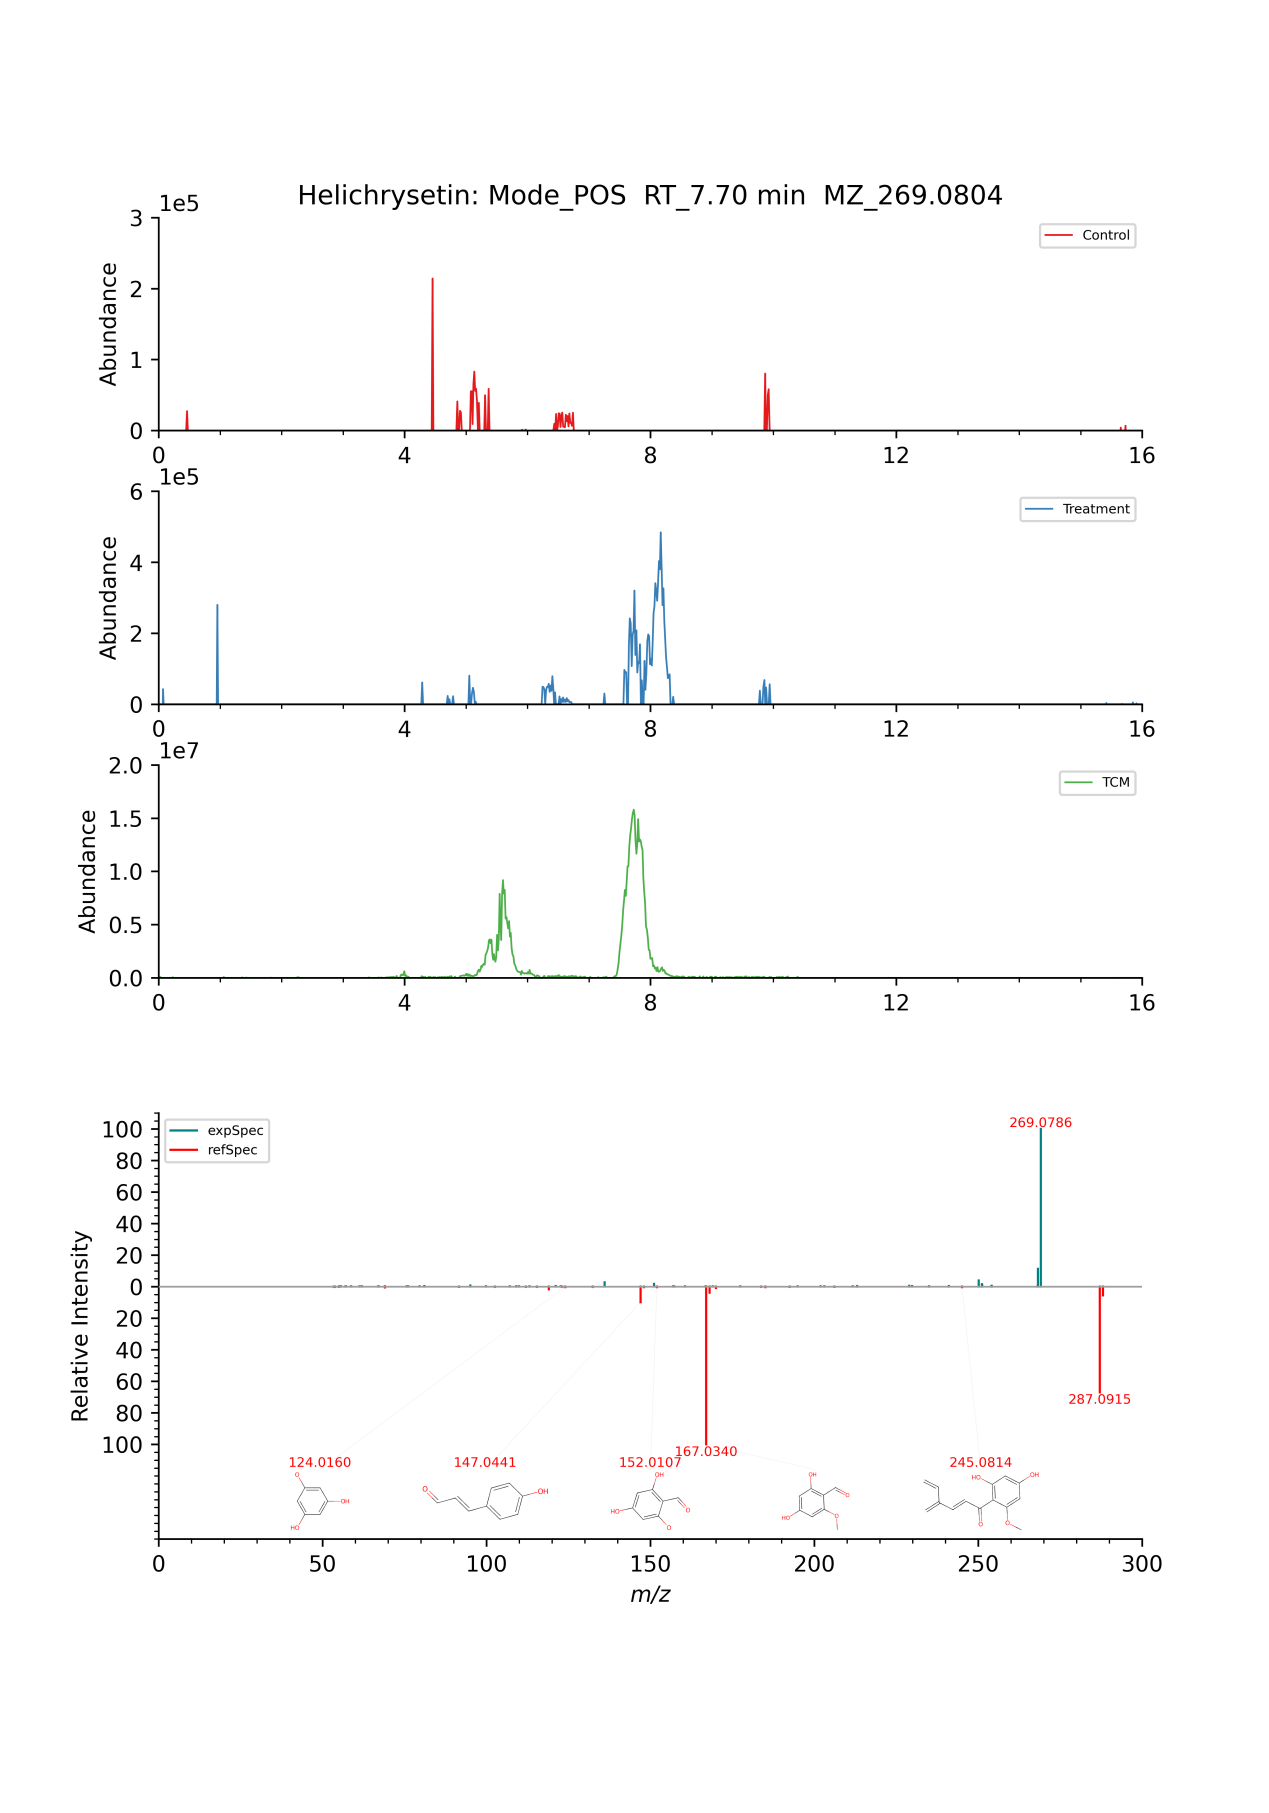


**Supplementary Figure 17.** Mass spectrometry of Helichrysetin and potential fragmentation pathways.


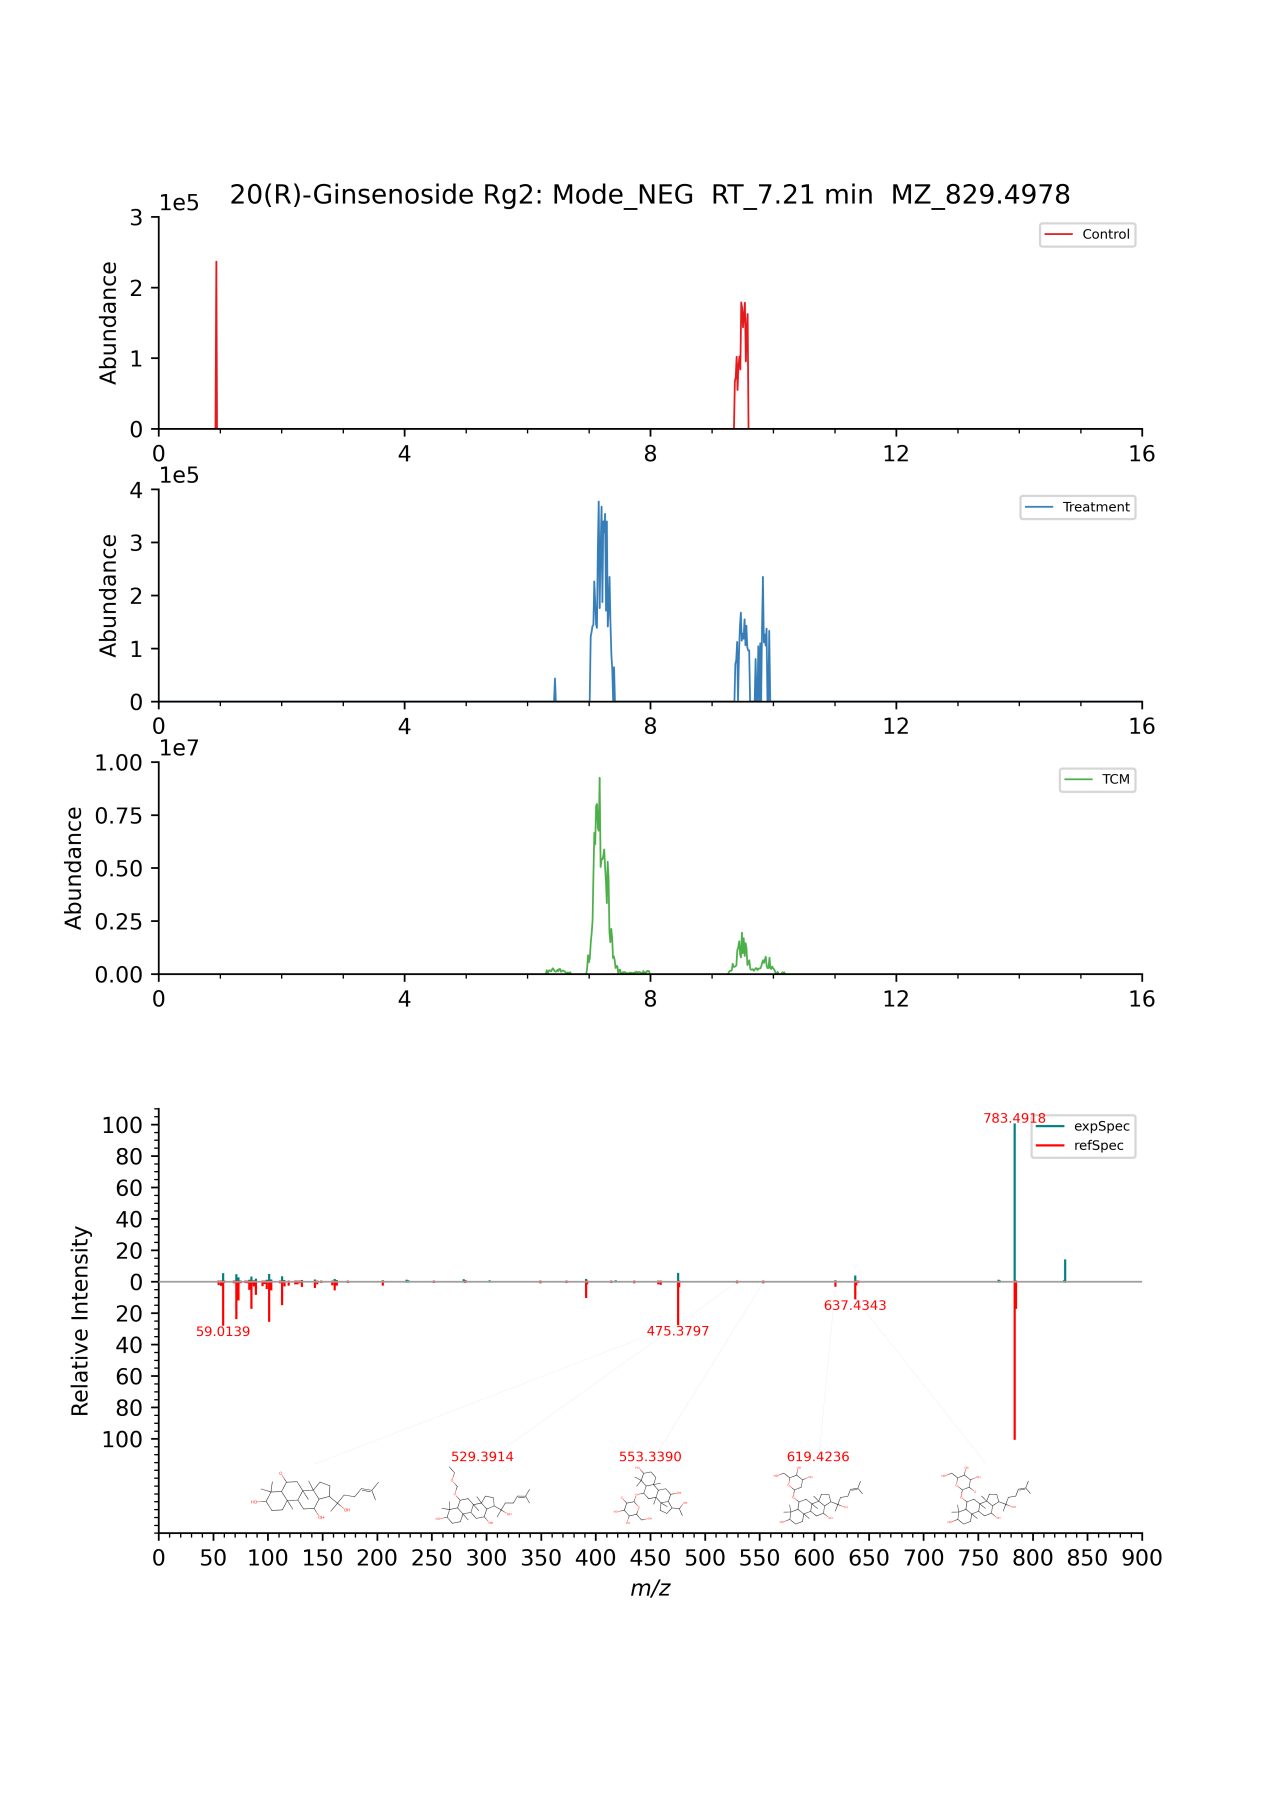


**Supplementary Figure 18.** Mass spectrometry of 20 (R) -Ginsenoside Rg2 and potential fragmentation pathways.


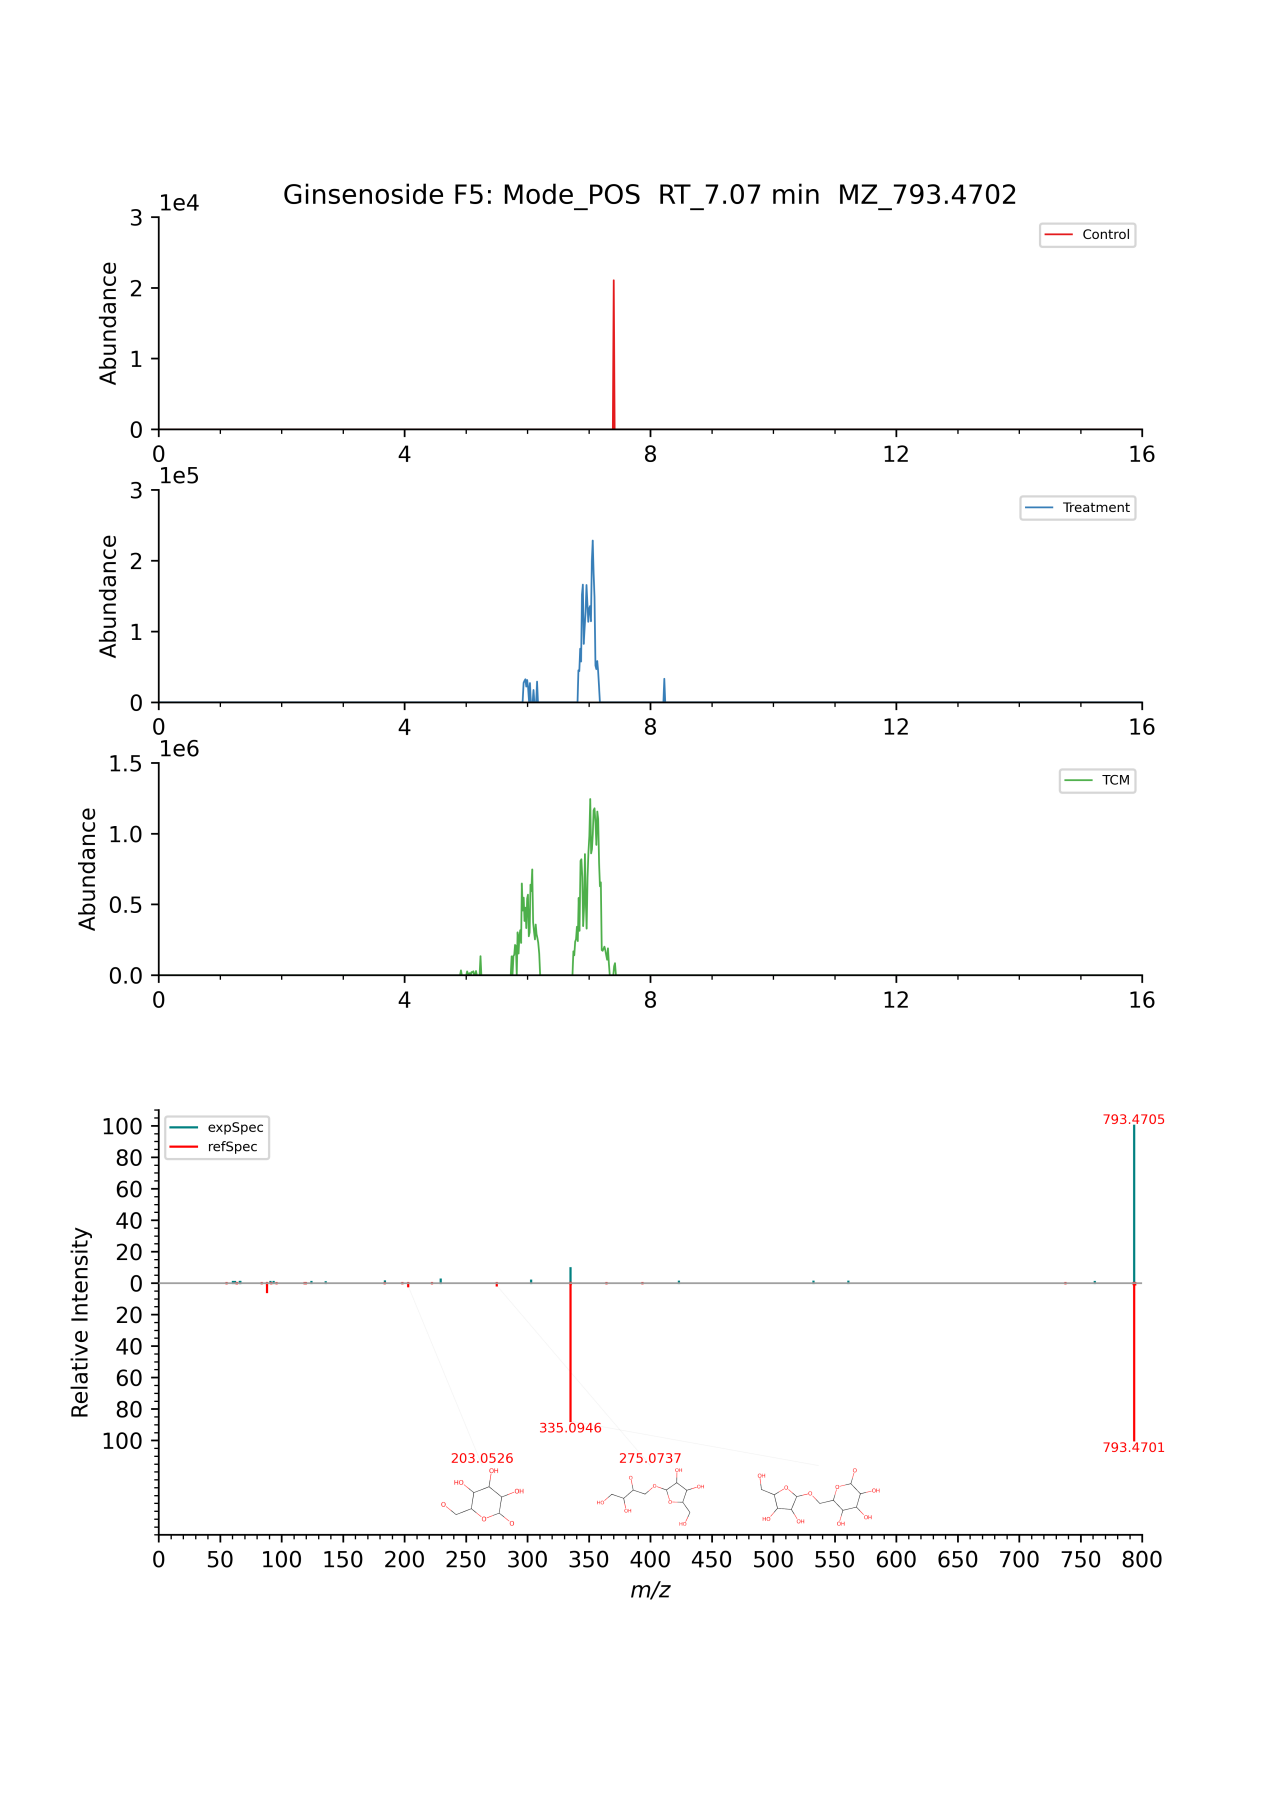


**Supplementary Figure 19.** Mass spectrometry of Ginsenoside F5 and potential fragmentation pathways.


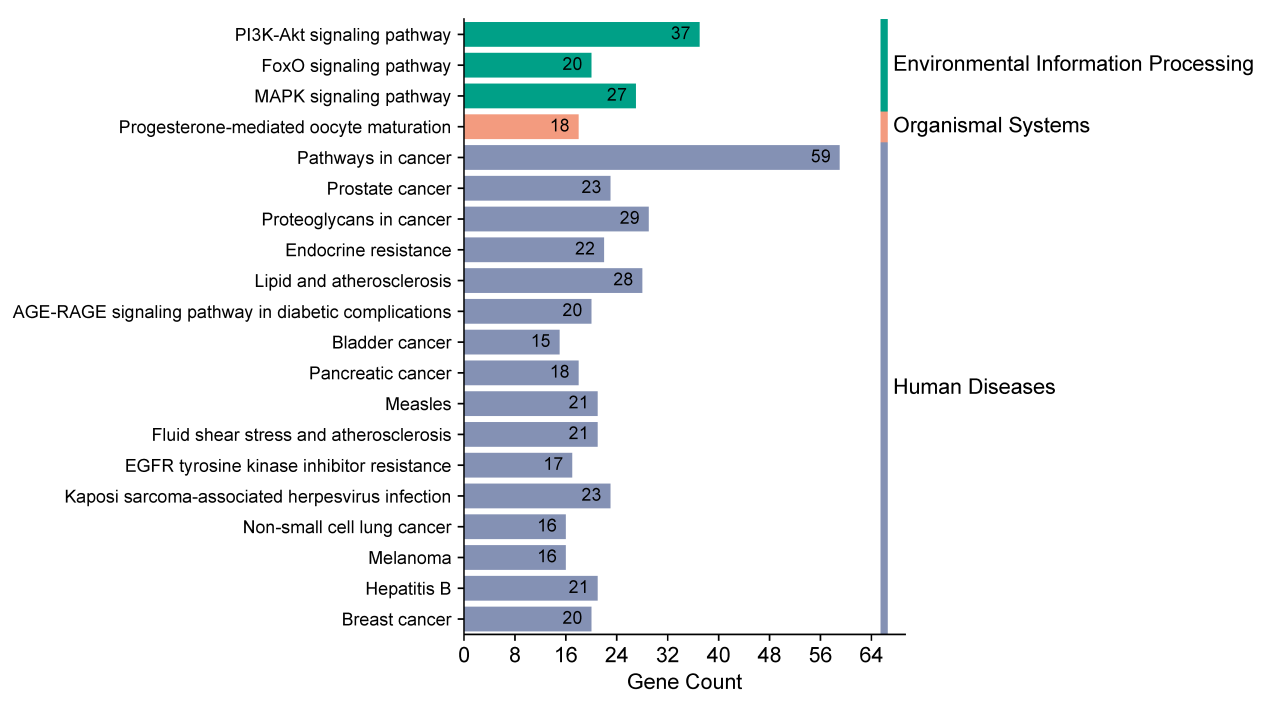


**Supplementary Figure 20.** Classified KEGG pathways of the genes from the intersecting regions. The pathways were further classified into three major groups: environmental information processing, organismal systems, and human disease.

**Supplementary Table 1** The 578 compounds were identified in HXF.

| **No.** | **Retention time (min)** | **Adducts** | **Formula** | **theoretical m/z** | **m/z** | **Mass Error (ppm)** | **Metabolites** |
| --- | --- | --- | --- | --- | --- | --- | --- |
| compound00001 | 6.82 | M+H | C48H82O18 | 947.5573927 | 947.5569 | -0.47 | CID 137918167 |
| compound00003 | 4.82 | M+H, M+Na | C21H20O12 | 465.1027521 | 465.103 | 0.45 | Hyperoside |
| compound00004 | 4.47 | M-H, M+FA-H | C19H30O8 | 431.1922342 | 431.1926 | 0.81 | Roseoside |
| compound00005 | 4.65 | M-H, M+FA-H | C14H17NO6 | 340.1037637 | 340.104 | 0.59 | Prunasin |
| compound00006 | 5.2 | M+Na | C47H80O18 | 955.5236981 | 955.5232 | -0.51 | Notoginsenoside R1 |
| compound00008 | 5.82 | M+H | C27H45NO3 | 432.3472214 | 432.3469 | -0.68 | Isoverticine |
| compound00009 | 7.69 | M-H | C16H12O4 | 267.0662829 | 267.0664 | 0.5 | Isoformononetin |
| compound00010 | 7.21 | M+H | C17H14O7 | 331.0812303 | 331.0809 | -1.11 | Iristectorigenin A |
| compound00011 | 9.8 | M+H, M+NH4, M+Na | C36H54O10 | 647.3789749 | 647.3786 | -0.51 | Glycyrrhetic acid 3-O-beta-D-glucuronide |
| compound00012 | 9.55 | M+FA-H | C36H60O8 | 665.4269165 | 665.4285 | 2.34 | Ginsenoside Rh4 |
| compound00013 | 5.38 | M+FA-H | C48H82O18 | 991.5482061 | 991.5507 | 2.5 | Ginsenosidere,(S) |
| compound00014 | 7.01 | M-H, M+FA-H | C54H92O23 | 1153.601046 | 1153.6035 | 2.13 | Ginsenoside Rb1 |
| compound00016 | 6.17 | M+H | C16H12O5 | 285.0757512 | 285.0754 | -1.32 | Calycosin |
| compound00018 | 7.4 | M+FA-H | C36H62O9 | 683.4374958 | 683.4389 | 2.01 | Ginsenoside Rh1 |
| compound00020 | 4.29 | M+FA-H | C26H28O13 | 593.1511253 | 593.152 | 1.52 | Puerarin apioside |
| compound00021 | 5.07 | M+H | C27H41NO3 | 428.3159213 | 428.3156 | -0.65 | Peimisine |
| compound00022 | 5.38 | M+H-H2O, M+H | C27H43NO3 | 430.3315716 | 430.3312 | -0.93 | Peiminine |
| compound00023 | 5.2 | M+H-H2O, M+H | C27H45NO3 | 432.3472215 | 432.3469 | -0.74 | Peimine |
| compound00026 | 5.57 | M+Na | C21H20O10 | 455.0949088 | 455.0941 | -1.8 | Oroxin A |
| compound00030 | 10.38 | M+H-H2O, M+Na, M+H | C19H22O4 | 315.1590871 | 315.1586 | -1.47 | Neocryptotanshinone |
| compound00031 | 7.42 | M+Na | C36H62O9 | 661.428621 | 661.4281 | -0.73 | Mogroside I E1 |
| compound00032 | 8.05 | M+Na | C36H62O9 | 661.4286245 | 661.428 | -0.88 | Mogroside I A1 |
| compound00037 | 7.7 | M+H-H2O, M+H | C16H14O5 | 269.0808106 | 269.0804 | -1.45 | Helichrysetin |
| compound00041 | 9.51 | M+Na | C36H60O8 | 643.4180622 | 643.4174 | -0.99 | Ginsenoside Rk3 |
| compound00042 | 7.21 | M-H, M+FA-H | C42H72O13 | 829.4953651 | 829.4978 | 2.89 | 20(R)-Ginsenoside Rg2 |
| compound00044 | 7.07 | M+Na | C41H70O13 | 793.4708833 | 793.4702 | -0.88 | Ginsenoside F5 |
| compound00054 | 8.22 | M+Na | C18H16O5 | 335.0890239 | 335.0886 | -1.29 | 5,7,8-Trimethoxyflavone |
| compound00057 | 6.1 | M+H-H2O | C16H14O7 | 301.0706422 | 301.0702 | -1.31 | Isorhambin |
| compound00058 | 7.01 | M+H-H2O, M+H | C30H50O2 | 425.377782 | 425.3775 | -0.63 | Tamarixol |
| compound00059 | 4.72 | M+NH4 | C27H38O4 | 444.3108405 | 444.3107 | -0.29 | Scoparinol |
| compound00060 | 5.22 | M+H-H2O | C41H70O13 | 753.4783389 | 753.4777 | -0.89 | notoginsenosider2 |
| compound00061 | 7.92 | M+H-H2O, M+H | C30H44O3 | 453.3363228 | 453.3358 | -1.09 | Neokadsuranic acid B |
| compound00062 | 8.14 | M+H | C14H14O4 | 247.0964861 | 247.0963 | -0.7 | Lomatin |
| compound00063 | 5.99 | M+FA-H | C41H70O13 | 815.4797382 | 815.4817 | 2.38 | Gypenoside XXI |
| compound00064 | 5.17 | M-H, M+FA-H | C48H82O19 | 1007.543102 | 1007.5461 | 2.93 | curculigosaponin K |
| compound00065 | 9.32 | M+H | C19H22O3 | 299.1641718 | 299.1639 | -0.82 | 8-geranyl-7-hydroxycoumarin |
| compound00066 | 7.01 | M+H-H2O | C36H62O8 | 605.4411673 | 605.4407 | -0.79 | 20(S)-Ginsenoside Rh2 |
| compound00067 | 8.02 | M+H-H2O | C36H60O7 | 587.4305992 | 587.43 | -0.99 | 2-(Hydroxymethyl)-6-[[12-hydroxy-4,4,8,10,14-pentamethyl-17-(6-methylhepta-2,5-dien-2-yl)-2,3,5,6,7,9,11,12,13,15,16,17-dodecahydro-1H-cyclopenta[a]phenanthren-3-yl]oxy]oxane-3,4,5-triol |
| compound00068 | 8.01 | M+H-H2O | C30H52O3 | 443.3883485 | 443.3881 | -0.51 | (2S,4aS,5R,6R,8aS)-5-[(3E,7E,11E)-13-hydroxy-4,8,12-trimethyltrideca-3,7,11-trienyl]-1,1,4a,6-tetramethyldecalin-2,6-diol |
| compound00069 | 7.01 | M+H-H2O | C30H48O | 407.3672179 | 407.367 | -0.59 | cimicifugenol |
| compound00070 | 4.79 | M-H | C21H22O10 | 433.1140209 | 433.1142 | 0.45 | Isohemiphloin |
| compound00071 | 5.73 | M+H, M+Na, M+K | C21H20O11 | 449.1078374 | 449.108 | 0.46 | Dihydrobaicalin |
| compound00072 | 4.79 | M+H, M+Na | C26H28O13 | 549.1602678 | 549.1601 | -0.39 | Chrysin 6-C-arabinoside 8-C-glucoside |
| compound00073 | 0.95 | M+H | C5H10N2O3 | 147.0764194 | 147.0763 | -0.76 | L-Glutamine |
| compound00074 | 4.69 | M-H, M+FA-H | C28H38O13 | 627.2293548 | 627.2306 | 1.99 | Lyoniresinol 9'-O-glucoside |
| compound00075 | 5.54 | M+H, M+K, M+Na | C11H8N2O3S2 | 281.0049118 | 281.0046 | -1.24 | Luciferin |
| compound00076 | 5.2 | M+NH4, M+Na | C27H22O12 | 561.1003654 | 561.0999 | -0.81 | Lithospermic acid |
| compound00077 | 5.93 | M+H | C15H12O4 | 257.0808364 | 257.0806 | -1.11 | Liquiritigenin |
| compound00078 | 8.35 | M+FA-H | C26H30O8 | 515.1922291 | 515.1927 | 0.93 | Limonin |
| compound00079 | 9.71 | M+Na, M+K, M+H | C22H22O6 | 383.1489159 | 383.1485 | -1.07 | Licoricone |
| compound00080 | 7.5 | M+H | C42H62O17 | 839.4059776 | 839.4055 | -0.62 | Licorice saponin G2 |
| compound00081 | 10.09 | M+H | C20H18O6 | 355.1176157 | 355.1173 | -0.96 | Licoflavonol |
| compound00082 | 5.82 | M-H | C16H14O5 | 285.0768475 | 285.077 | 0.41 | Licochalcone B |
| compound00083 | 1.61 | M+H | C11H20N2O5 | 261.1444987 | 261.1444 | -0.52 | Leucyl-Glutamate |
| compound00084 | 0.94 | M+H | C5H9NO2 | 116.0706054 | 116.0706 | -0.45 | L-Proline |
| compound00085 | 2.36 | M-H | C9H11NO2 | 164.0716976 | 164.071 | -4.52 | L-Phenylalanine |
| compound00086 | 0.77 | M+H-H2O, M+H | C6H14N2O2 | 147.1128045 | 147.1128 | -0.34 | L-Lysine |
| compound00087 | 0.78 | M+H | C6H9N3O2 | 156.076753 | 156.0767 | -0.04 | L-Histidine |
| compound00088 | 0.91 | M+H | C5H9NO4 | 148.0604352 | 148.0603 | -1.04 | L-Glutamic acid |
| compound00089 | 0.91 | M+H | C4H8N2O3 | 133.0607694 | 133.0607 | -0.88 | L-Asparagine |
| compound00090 | 0.81 | M-H | C6H14N4O2 | 173.1043955 | 173.1037 | -3.75 | L-Arginine |
| compound00091 | 5.36 | M+H | C27H30O13 | 563.1759181 | 563.1755 | -0.67 | Kushenol O |
| compound00092 | 4.91 | M+H | C8H8O3 | 153.0546203 | 153.0547 | 0.2 | Isovanillin |
| compound00093 | 7.7 | M+H | C20H20O7 | 373.1281805 | 373.1278 | -1.05 | Isosinensetin |
| compound00094 | 4.97 | M+H | C27H30O14 | 579.1708324 | 579.1707 | -0.29 | Isorhoifolin |
| compound00095 | 5.99 | M-H, M+FA-H | C23H28O10 | 509.166356 | 509.1674 | 2.09 | Isomucronulatol 7-O-glucoside |
| compound00096 | 5.79 | M-H | C31H40O15 | 651.229446 | 651.2306 | 1.82 | Isomartynoside |
| compound00097 | 0.95 | M+H-H2O | C24H42O21 | 649.2185507 | 649.2178 | -1.14 | Isomaltotetraose |
| compound00098 | 5.29 | M+H | C26H30O13 | 551.1759185 | 551.1754 | -1.01 | Isoliquiritin apioside |
| compound00099 | 5.44 | M+H | C21H22O9 | 419.13366 | 419.1331 | -1.26 | Isoliquiritin |
| compound00100 | 7.43 | M+H | C15H12O4 | 257.0808362 | 257.0806 | -0.94 | Isoliquiritigenin |
| compound00101 | 5.04 | M-H | C25H24O12 | 515.1195001 | 515.1197 | 0.3 | Isochlorogenic acid C |
| compound00102 | 1.17 | M+H | C5H4N4O | 137.0457878 | 137.0457 | -0.61 | Hypoxanthine |
| compound00103 | 0.83 | M-H, M+FA-H | C18H32O16 | 549.1671899 | 549.1678 | 1.06 | Manninotriose |
| compound00104 | 0.78 | M+H-H2O, M+Na | C6H13NO5 | 162.0760694 | 162.0759 | -0.87 | Mannosamine |
| compound00105 | 0.79 | M+H | C6H13NO5 | 180.0866494 | 180.0866 | -0.48 | Manosamine |
| compound00106 | 0.9 | M+NH4 | C18H32O16 | 522.2028793 | 522.2023 | -1.05 | Melezitose |
| compound00107 | 8.82 | M+H | C15H20O2 | 233.1536071 | 233.1534 | -0.73 | Pterosin Z |
| compound00108 | 10.66 | M+H-H2O, M+H | C30H44O5 | 485.326152 | 485.3257 | -1.03 | Poricoic acid B |
| compound00109 | 5.92 | M-H, M+FA-H | C28H34O14 | 639.1929753 | 639.1942 | 1.85 | Poncirin |
| compound00110 | 2.77 | M+Na, M+H | C9H17NO5 | 220.1179496 | 220.1178 | -0.51 | Pantothenic acid |
| compound00111 | 4.5 | M-H | C20H22O9 | 405.1191067 | 405.1195 | 0.88 | Oxyresveratrol 3'-o-beta-D-glucopyranoside |
| compound00112 | 4.4 | M+FA-H | C20H22O9 | 451.1245075 | 451.1253 | 1.73 | Oxyresveratrol 2-O-beta-D-glucopyranoside |
| compound00113 | 9.04 | M+H, M+Na, M+K | C21H22O8 | 403.138745 | 403.1384 | -0.93 | Nobiletin |
| compound00114 | 4.82 | M+H | C21H22O9 | 419.1336594 | 419.1334 | -0.71 | Neoliquiritin |
| compound00115 | 9.87 | M+H | C21H18O6 | 367.1176157 | 367.1173 | -0.92 | Neoglycyrol |
| compound00116 | 10.13 | M+H | C15H24O2 | 237.1849072 | 237.1847 | -0.74 | Neocurdione |
| compound00117 | 3.72 | M-H | C16H18O9 | 353.0878066 | 353.0881 | 0.87 | Neochlorogenic acid |
| compound00118 | 9.12 | M+FA-H | C20H18O4 | 367.1186901 | 367.1189 | 0.49 | Neobavaisoflavone |
| compound00119 | 4.24 | M+FA-H, 2M-H, M-H | C20H27NO11 | 502.1565694 | 502.1571 | 0.98 | Neoamygdalin |
| compound00120 | 9.62 | M+H, M+Na | C21H22O9 | 419.1336597 | 419.1333 | -0.96 | Natsudaidain |
| compound00121 | 4.96 | M+H, M+Na | C27H32O14 | 581.1864824 | 581.1863 | -0.27 | Naringin |
| compound00122 | 4.93 | M+H, M+Na | C28H32O16 | 625.1763118 | 625.1761 | -0.4 | Narcissin |
| compound00123 | 0.8 | M+H | C9H20N2O2 | 189.1597544 | 189.1597 | -0.05 | N6,N6,N6-Trimethyl-L-lysine |
| compound00124 | 6.16 | M-H | C34H37N3O6 | 582.2609608 | 582.2617 | 1.34 | N1,N5,N10-Tri-p-coumaroylspermidine |
| compound00125 | 13.3 | M+H, M+Na | C23H45NO3 | 406.3291961 | 406.3286 | -1.35 | N-Stearoyl Valine |
| compound00126 | 5.09 | M+H, M+Na, M+H-H2O | C13H14N2O3 | 247.1077192 | 247.1076 | -0.45 | N-Acetyltryptophan |
| compound00127 | 3.91 | M-H | C11H13NO4 | 222.07718 | 222.0769 | -1.48 | N-Acetyl-L-tyrosine |
| compound00128 | 5.01 | M-H | C11H13NO3 | 206.0822651 | 206.0819 | -1.76 | N-Acetyl-L-phenylalanine |
| compound00129 | 1.28 | M-H | C7H11NO5 | 188.0564427 | 188.0558 | -3.34 | N-Acetyl-L-glutamic acid |
| compound00130 | 2.45 | M+H, M+Na, M+H-H2O | C15H21NO7 | 328.1390798 | 328.1386 | -1.32 | N-(1-Deoxy-1-fructosyl)phenylalanine |
| compound00131 | 1.56 | M-H | C12H23NO7 | 292.1401766 | 292.1404 | 0.91 | N-(1-Deoxy-1-fructosyl)leucine |
| compound00132 | 9.59 | M-H | C40H36O11 | 691.2184874 | 691.2198 | 1.89 | Multicaulisin |
| compound00133 | 9.9 | M+H, M+Na | C25H26O7 | 439.1751305 | 439.1747 | -0.91 | Morusinol |
| compound00134 | 11 | M+H | C25H24O6 | 421.1645662 | 421.164 | -1.23 | Morusin |
| compound00135 | 4.21 | M+H | C7H7NO3 | 154.0498699 | 154.0498 | -0.37 | Methyl 5-hydroxypyridine-2-carboxylate |
| compound00136 | 4.08 | M+H, M+Na | C27H32O16 | 613.1763118 | 613.1761 | -0.42 | Hydroxysafflor yellow A |
| compound00137 | 3.79 | M-H | C9H10O4 | 181.0506291 | 181.05 | -3.25 | Hydroxyphenyllactic acid |
| compound00138 | 4.23 | M-H | C9H10O4 | 181.0506289 | 181.05 | -3.41 | Hydroumbellic acid |
| compound00139 | 3.22 | M+H | C10H18N2O5 | 247.1288485 | 247.1287 | -0.41 | Aspartyl-Leucine |
| compound00140 | 4.76 | M+H, M+Na | C48H52O26 | 1045.281958 | 1045.2818 | -0.15 | Anhydrosafflor yellow B |
| compound00141 | 0.83 | M-H, M+FA-H | C12H22O11 | 387.1143787 | 387.1147 | 0.79 | Alpha-Lactose |
| compound00142 | 11.14 | M+H-H2O | C15H24O | 203.1794166 | 203.1793 | -0.62 | Alismol |
| compound00143 | 1.28 | M+FA-H | C10H13N5O4 | 312.0949354 | 312.0951 | 0.47 | Adenosine |
| compound00144 | 4.39 | M+H, M+Na | C27H30O17 | 627.1555756 | 627.1558 | 0.33 | 6-Hydroxykaempferol 3,6-diglucoside |
| compound00145 | 4.46 | M+H, M+Na | C27H28O17 | 625.1399251 | 625.1404 | 0.74 | 6-hydroxyapigenin-6-O-beta-D-glucoside-7-O-beta-D-glucuronide |
| compound00146 | 8.14 | M+H | C19H18O6 | 343.117616 | 343.1172 | -1.3 | 6-Demethoxytangeretin |
| compound00147 | 0.89 | M+H | C12H23NO10 | 342.1394737 | 342.139 | -1.34 | 6-(alpha-D-Glucosaminyl)-1D-myo-inositol |
| compound00148 | 2.48 | M+H-H2O, M+H | C6H6O3 | 127.0389708 | 127.0389 | -0.31 | 5-Hydroxymethylfurfural |
| compound00149 | 4.13 | M+H | C10H9NO3 | 192.06552 | 192.0654 | -0.38 | 5-Hydroxyindoleacetic acid |
| compound00150 | 9.39 | M+H, M+Na | C18H16O7 | 345.0968802 | 345.0966 | -0.9 | 5,7-Dihydroxy-3,4',8-trimethoxyflavone |
| compound00151 | 0.95 | M+H | C7H15NO2 | 146.1175562 | 146.1174 | -0.99 | 4-Trimethylammoniobutanoic acid |
| compound00152 | 1.58 | M-H | C8H9NO4 | 182.0458784 | 182.0454 | -2.88 | 4-Pyridoxic acid |
| compound00153 | 5.14 | M+FA-H | C30H32O15 | 677.1723873 | 677.1714 | -1.42 | 4-O-galloylalbiflorin |
| compound00154 | 3.82 | M+FA-H | C15H18O8 | 371.0983488 | 371.0985 | 0.48 | 4-O-beta-Glucopyranosyl-cis-coumaric acid |
| compound00155 | 5.38 | M+H | C9H7NO | 146.0600413 | 146.0599 | -1.03 | 4-formyl Indole |
| compound00156 | 9.42 | M+H-H2O, M+H, M+Na | C12H16O2 | 193.1223061 | 193.1223 | 0.08 | 3-N-butyl-4,5-dihydrophthalide |
| compound00157 | 1.18 | M+H-H2O, M+H | C6H5NO3 | 140.0342202 | 140.0341 | -0.79 | 3-Hydroxypicolinic acid |
| compound00158 | 4.61 | M+H | C7H6O2 | 123.0440553 | 123.0441 | 0.56 | 3-Hydroxybenzaldehyde |
| compound00159 | 3.06 | M-H | C7H6O4 | 153.0193274 | 153.0186 | -4.8 | 3,5-Dihydroxybenzoic acid |
| compound00160 | 9.44 | M+H, M+Na, M+K | C22H24O9 | 455.1312749 | 455.1308 | -0.95 | 3,5,6,7,8,3',4'-Heptemthoxyflavone |
| compound00161 | 4.03 | M+H | C7H6O3 | 139.0389708 | 139.0389 | -0.27 | 3,4-Dihydroxybenzaldehyde |
| compound00162 | 1.87 | M-H | C10H14N2O6 | 257.0779098 | 257.0779 | 0.02 | 2′-O-Methyluridine |
| compound00163 | 10.43 | M+H-H2O | C32H50O7 | 529.3522916 | 529.35 | -4.36 | 23(R)-16beta-hydroperoxyalisol B 23-acetate |
| compound00164 | 12.12 | M-H | C16H32O3 | 271.2278691 | 271.228 | 0.67 | 2-Hydroxyhexadecanoic acid |
| compound00165 | 0.78 | M+H | C6H13NO4 | 164.0917348 | 164.0917 | -0.45 | 1-Deoxymannojirimycin |
| compound00166 | 3.13 | M-H | C16H18O9 | 353.0878063 | 353.088 | 0.53 | 1-Caffeoylquinic acid |
| compound00167 | 1.21 | M-H, M+FA-H | C9H12N2O6 | 243.0622595 | 243.0622 | -0.19 | 1-beta-D-Arabinofuranosyluracil |
| compound00168 | 10.47 | M-H | C17H24O3 | 275.1652684 | 275.1653 | 0.19 | (1R,4E,9E,11S)-4,12,12-trimethyl-8-oxobicyclo[9.1.0]dodeca-4,9-dien-2-yl acetate |
| compound00169 | 12.5 | M+H-H2O, M+H | C20H32O2 | 305.2475079 | 305.2471 | -1.19 | Arachidonic acid |
| compound00170 | 5.4 | M-H | C9H16O4 | 187.0975796 | 187.097 | -2.97 | Azelaic acid |
| compound00171 | 0.77 | M+H | C5H9N3 | 112.0869239 | 112.0869 | -0.2 | Histamine |
| compound00172 | 2.39 | M+H | C7H6O | 107.0491416 | 107.0491 | -0.36 | Benzaldehyde |
| compound00173 | 5.14 | M-H, M+FA-H | C28H34O15 | 609.1824953 | 609.1833 | 1.31 | Hesperidin |
| compound00174 | 3.89 | M+H | C33H40O22 | 789.2084006 | 789.2074 | -1.29 | Herbacetin 3-sophoroside-8-glucoside |
| compound00175 | 1.32 | M-H | C10H13N5O5 | 282.0843923 | 282.0844 | 0.18 | Guanosine |
| compound00176 | 7.98 | M+H, M+Na | C42H62O16 | 823.411063 | 823.4105 | -0.65 | Glycyrrhizic acid |
| compound00177 | 9.47 | M+H | C20H18O6 | 355.1176157 | 355.1173 | -0.97 | Glycyrrhisoflavone |
| compound00178 | 3.82 | M+H | C11H14N2O3 | 223.1077195 | 223.1076 | -0.72 | Glycyl-Phenylalanine |
| compound00179 | 0.89 | M-H | C6H12O7 | 195.0510235 | 195.0505 | -2.76 | Gluconic acid |
| compound00180 | 8.25 | M+H, M+Na | C21H20O6 | 369.1332657 | 369.1329 | -0.94 | Glicoricone |
| compound00181 | 5.4 | M+Na | C42H72O14 | 823.4814499 | 823.4807 | -0.97 | Ginsenoside Rg1 |
| compound00182 | 4.12 | M+H | C14H18N2O5 | 295.1288485 | 295.1287 | -0.42 | gamma-Glu-Phe |
| compound00183 | 1.74 | M-H | C7H6O5 | 169.0142433 | 169.0136 | -3.55 | Gallic acid |
| compound00184 | 0.92 | M-H | C6H10O7 | 193.0353731 | 193.0348 | -3.14 | Galacturonic acid |
| compound00185 | 6.27 | M+H | C17H12N2O4 | 309.0869845 | 309.0866 | -1.22 | Flazin |
| compound00186 | 5.01 | M+H-H2O | C10H10O4 | 177.0546217 | 177.0546 | 0.06 | Ferulic acid |
| compound00187 | 4.19 | M+FA-H | C21H26O13 | 531.1355368 | 531.1356 | 0.15 | Fabiatrin |
| compound00188 | 8.43 | M+H | C18H16O7 | 345.0968805 | 345.0965 | -1.19 | Eupatilin |
| compound00189 | 10.79 | M+H | C25H26O6 | 423.1802162 | 423.1797 | -1.25 | Epimedokoreanin B |
| compound00190 | 12.41 | M-H, M+FA-H, 2M-H | C22H32O2 | 327.232954 | 327.233 | 0.15 | Docosahexaenoic acid |
| compound00191 | 8.04 | M+H | C11H16O2 | 181.1223069 | 181.1222 | -0.69 | Dihydroactinidiolide |
| compound00192 | 1.3 | M+H | C10H13N5O3 | 252.1091164 | 252.1089 | -0.69 | Deoxyadenosine |
| compound00193 | 4.05 | M+H | C15H16O9 | 341.0867091 | 341.0865 | -0.55 | Daphnin |
| compound00194 | 0.95 | M+H-H2O, M+H | C4H9N3O2 | 132.0767534 | 132.0767 | -0.45 | Creatine |
| compound00195 | 1.17 | M-H | C6H8O7 | 191.0197232 | 191.0192 | -2.98 | Citric acid |
| compound00196 | 8.1 | M-H | C17H14O6 | 313.0717623 | 313.0719 | 0.6 | Cirsimaritin |
| compound00197 | 3.91 | M-H | C15H16O9 | 339.0721558 | 339.0722 | 0.13 | Cichoriin |
| compound00198 | 4.13 | M-H | C15H14O6 | 289.0717623 | 289.0719 | 0.52 | Catechin |
| compound00199 | 8.93 | M-H | C19H18O8 | 373.0928917 | 373.0931 | 0.63 | Casticin |
| compound00200 | 0.78 | M+H, M+Na | C5H12N4O3 | 177.0982172 | 177.0981 | -0.48 | Canavanine sulfate |
| compound00201 | 3.73 | M-H | C13H12O9 | 311.0408556 | 311.0409 | 0.08 | Caftaric acid |
| compound00202 | 10.66 | M+H | C18H30O2 | 279.2318578 | 279.2315 | -1.15 | Punicic acid |
| compound00203 | 1.2 | M+H, M+NH4 | C8H11NO3 | 170.0811703 | 170.0811 | -0.69 | Pyridoxine |
| compound00204 | 1.22 | M+H | C5H7NO3 | 130.0498697 | 130.0498 | -0.2 | Pyroglutamic acid |
| compound00205 | 4.38 | M+H | C17H20N4O6 | 377.1455617 | 377.1452 | -0.93 | Riboflavin |
| compound00206 | 3.23 | M-H | C14H18O9 | 329.0878062 | 329.088 | 0.51 | Vanillic acid 4-beta-D-glucopyranoside |
| compound00207 | 4.01 | M+H | C11H22N2O3 | 231.1703189 | 231.1703 | 0.1 | Valylleucine |
| compound00208 | 6.81 | M-H | C11H20O4 | 215.1288811 | 215.1286 | -1.54 | Undecanedioic acid |
| compound00209 | 0.9 | M+NH4 | C12H22O11 | 360.1500576 | 360.1496 | -1.14 | Turanose |
| compound00210 | 0.88 | M+Na | C7H7NO2 | 160.0369544 | 160.0366 | -2.4 | Trigonelline |
| compound00211 | 4.03 | M-H, M+FA-H | C16H20O9 | 401.1089304 | 401.109 | 0.1 | Trans-ferulic acid-4-beta-glucoside |
| compound00212 | 2.14 | M+Na | C10H14N2O5 | 265.0795175 | 265.0792 | -1.1 | Thymidine |
| compound00213 | 3.2 | M+H | C10H20N2O4 | 233.1495841 | 233.1495 | -0.53 | Threonylleucine |
| compound00214 | 11.58 | M+H | C19H18O3 | 295.1328724 | 295.1324 | -1.53 | Tanshinone IIA |
| compound00215 | 9.61 | M+H, M+K, M+Na | C20H20O7 | 373.1281803 | 373.1278 | -0.89 | Tangeretin |
| compound00216 | 6.25 | M+H, M+Na, M+H-H2O | C22H26O8 | 441.1519917 | 441.1519 | -0.14 | Syringaresinol |
| compound00217 | 2.36 | M+H-H2O | C6H6O4 | 125.0233158 | 125.0233 | -0.27 | Sumiki's acid |
| compound00218 | 5.82 | M+H | C15H12O6 | 289.0706657 | 289.0703 | -1.2 | Steppogenin |
| compound00219 | 0.81 | M-H, M+FA-H | C24H42O21 | 711.2199764 | 711.2213 | 1.88 | Stachyose |
| compound00220 | 8.54 | M+H | C48H78O18 | 943.5260918 | 943.5263 | 0.27 | Soyasaponin Bb |
| compound00221 | 8.93 | M+H, M+Na | C19H18O8 | 375.1074448 | 375.1071 | -0.87 | Skullcapflavone II |
| compound00222 | 4.08 | M+H | C15H16O8 | 325.0917942 | 325.0917 | -0.31 | Skimmin |
| compound00223 | 8.33 | M+Na, M+K, M+H | C20H20O7 | 395.1101435 | 395.1098 | -0.86 | Sinensetin |
| compound00224 | 3.74 | M+H | C12H16N2O4 | 253.1182835 | 253.1183 | -0.03 | Serylphenylalanine |
| compound00225 | 9.35 | M+H, M+Na | C20H16O6 | 353.1019657 | 353.1016 | -1.04 | Semilicoisoflavone B |
| compound00226 | 5.93 | M-H | C10H18O4 | 201.1132305 | 201.1128 | -2.11 | Sebacic acid |
| compound00227 | 9.04 | M+H, M+Na | C19H18O6 | 343.1176156 | 343.1173 | -0.91 | Scutellarein tetramethyl ether |
| compound00228 | 4.48 | M+H, M+Na | C26H28O14 | 565.1551817 | 565.1553 | 0.27 | Schaftoside |
| compound00229 | 4.41 | M+H | C27H30O15 | 595.1657467 | 595.1657 | -0.02 | Saponarin |
| compound00230 | 5.34 | M+H | C36H30O16 | 719.1606623 | 719.1599 | -1.01 | Salvianolic acid Y |
| compound00231 | 5.06 | M+NH4, M+Na | C36H30O16 | 741.1426112 | 741.1424 | -0.25 | Salvianolic acid E |
| compound00232 | 5.71 | M-H | C26H22O10 | 493.1140215 | 493.1145 | 1.04 | Salvianolic acid A |
| compound00233 | 4.88 | M-H | C24H26O13 | 521.1300655 | 521.1306 | 1.02 | Salviaflaside |
| compound00234 | 4.05 | M+H-H2O | C7H8O2 | 107.049142 | 107.0491 | 0.05 | Salicyl alcohol |
| compound00235 | 10.92 | M+H-H2O, M+H | C18H34O3 | 281.2474898 | 281.2472 | -1 | Ricinoleic acid |
| compound00236 | 2.94 | M+H, M+Na | C14H20N2O4 | 281.1495846 | 281.1493 | -1.08 | Valyltyrosine |
| compound00237 | 4.5 | M-H | C26H28O14 | 563.1406304 | 563.1413 | 1.21 | Vicenin-1 |
| compound00238 | 4.64 | M+H, M+Na | C27H30O14 | 579.1708328 | 579.1704 | -0.75 | Violanthin |
| compound00239 | 5.04 | M+H | C15H10O7 | 303.0499296 | 303.0498 | -0.46 | Viscidulin I |
| compound00240 | 9.08 | M+H-H2O, M+H | C21H20O6 | 369.1332656 | 369.133 | -0.76 | Glycycoumarin |
| compound00241 | 4.54 | M+Na | C19H26O12 | 469.1316388 | 469.1318 | 0.35 | Gaultherin |
| compound00242 | 8.04 | M+H, M+Na | C17H16O5 | 301.1070509 | 301.1068 | -0.81 | Methylnissolin |
| compound00243 | 5.86 | M+H, M+NH4, M+Na | C23H26O10 | 485.1418331 | 485.1415 | -0.67 | Methylnissolin-3-O-glucoside |
| compound00244 | 5.01 | M+Na | C18H26O9 | 409.1468834 | 409.1472 | 0.86 | Methylsyringin |
| compound00245 | 7.13 | M-H | C19H18O5 | 325.1081475 | 325.1082 | 0.25 | Moracin O |
| compound00246 | 10.13 | M+H | C17H14O5 | 299.091401 | 299.0911 | -1.03 | Mosloflavone |
| compound00247 | 7.92 | M-H | C34H24O10 | 591.1296717 | 591.1304 | 1.19 | Mulberrofuran Q |
| compound00248 | 9.1 | M-H | C34H26O8 | 561.155492 | 561.1559 | 0.66 | Mulberrofuran G |
| compound00249 | 12.89 | M+K | C25H37NO | 406.2506833 | 406.2506 | -0.27 | N-Benzyllinolenamide |
| compound00250 | 3.97 | M+H, M+Na, M+NH4, M+K | C26H32O14 | 591.1684394 | 591.1681 | -0.57 | Mulberroside A |
| compound00251 | 4.22 | M+Na | C26H30O14 | 589.1527945 | 589.1523 | -0.79 | Mulberroside F |
| compound00252 | 1 | M+H | C8H16N4O3 | 217.1295167 | 217.1295 | 0.1 | N-Acetylarginine |
| compound00253 | 4.63 | M-H | C17H20O9 | 367.1034564 | 367.1037 | 0.6 | Methyl chlorogenate |
| compound00254 | 3.81 | M+NH4 | C10H13NO3 | 213.1233738 | 213.1233 | -0.28 | N-acetyldopamine |
| compound00255 | 1.91 | M+Na | C7H10O7 | 229.0318748 | 229.0319 | -0.06 | Methyl citrate |
| compound00256 | 4.98 | M-H2O-H | C20H24O9 | 389.1242143 | 389.1247 | 1.21 | Marmesinin |
| compound00257 | 0.91 | M+Na | C7H14O6 | 217.068267 | 217.0682 | -0.36 | Methyl beta-D-Galactopyranoside |
| compound00258 | 5.05 | M-H | C9H10O5 | 197.0455425 | 197.0447 | -4.42 | Methyl 3-O-methylgallate |
| compound00259 | 8.18 | M+H, M+Na | C15H16O4 | 283.0940981 | 283.0939 | -0.8 | Meranzin |
| compound00260 | 4.42 | M+FA-H | C13H24O4 | 289.1656267 | 289.1659 | 0.79 | Megastigm-7-ene-3,5,6,9-tetraol |
| compound00261 | 6.39 | M+H-H2O | C21H24O7 | 371.1488948 | 371.1485 | -1.18 | Medioresil |
| compound00262 | 8.47 | M+H | C16H14O4 | 271.0964865 | 271.0962 | -1.08 | Medicarpin |
| compound00263 | 6.34 | M-H2O-H | C42H64O17 | 821.396556 | 821.3986 | 2.45 | Medicagenic acid-3-O-beta-D-glucuronic acid-28-O-beta-D-glucopyranoside |
| compound00264 | 7.5 | M-H | C19H24O5 | 331.1550979 | 331.1552 | 0.43 | Marmin |
| compound00265 | 0.86 | M+K | C18H32O16 | 543.1322297 | 543.1317 | -0.94 | Maltotriose |
| compound00266 | 4.12 | M+H | C14H16N2O3 | 261.1233708 | 261.1229 | -1.97 | Maculosin |
| compound00267 | 4.83 | M+H-H2O | C8H8O2 | 119.0491387 | 119.0491 | -0.15 | m-Anisaldehyde |
| compound00268 | 8.8 | M+K | C15H20O4 | 303.099424 | 303.0986 | -2.74 | Lupulone C |
| compound00269 | 9.85 | M-H | C20H18O5 | 337.1081482 | 337.1085 | 0.95 | Lupiwighteone |
| compound00270 | 0.98 | M+H-H2O | C6H11NO3 | 128.0705942 | 128.0705 | -0.64 | N-Hydroxypipecolic acid |
| compound00271 | 4.77 | M+NH4, M+Na | C26H30O13 | 573.1578672 | 573.1577 | -0.24 | Liquiritin apioside |
| compound00272 | 5.73 | M-H | C20H20N2O4 | 351.1350311 | 351.1352 | 0.38 | N-feruloylserotonin |
| compound00273 | 4.96 | M+H-H2O, M+Na | C20H22O8 | 413.1206904 | 413.1207 | -0.09 | Polydatin |
| compound00274 | 4.49 | M-H | C20H23NO12 | 468.11475 | 468.1153 | 1.27 | Narciclasine-4-O-beta-D-glucopyranoside |
| compound00275 | 5.07 | M+FA-H | C26H32O11 | 565.1926184 | 565.1932 | 1.03 | Pinoresinol 4-O-beta-D-glucopyranoside |
| compound00276 | 9.59 | M-H | C20H18O6 | 353.1030627 | 353.1033 | 0.8 | Licoisoflavone A |
| compound00277 | 7 | M+FA-H | C36H58O10 | 695.4011376 | 695.4021 | 1.41 | Rosamultin |
| compound00278 | 5.7 | M+FA-H | C14H12O3 | 273.0768108 | 273.077 | 0.81 | Resveratrol |
| compound00279 | 4.48 | M+H-H2O | C18H24O10 | 383.1335737 | 383.1317 | -5 | Regaloside A |
| compound00280 | 4.59 | M-H | C26H28O16 | 595.1304604 | 595.1316 | 1.96 | Quercetin 3-sambubioside |
| compound00281 | 4.64 | M+H-H2O, M+Na, M+H | C27H30O16 | 611.1606603 | 611.1612 | 0.95 | Quercetin 3-o-neohesperidoside |
| compound00282 | 4.59 | M-H | C21H20O13 | 479.0831157 | 479.0838 | 1.45 | Quercetagitrin |
| compound00283 | 10.01 | M-H | C20H16O5 | 335.0924981 | 335.0928 | 0.88 | Psoralidin |
| compound00284 | 4.47 | 2M-H | C17H18O9 | 731.1828904 | 731.1847 | 2.51 | Psoralenoside |
| compound00285 | 7.54 | M-H | C47H74O18 | 925.4802421 | 925.483 | 3 | Pseudoginsenoside RT1 |
| compound00286 | 6.81 | M+H, M+Na | C42H72O14 | 823.4814461 | 823.4808 | -0.8 | Pseudoginsenoside F11 |
| compound00287 | 5.17 | M+H | C15H12O5 | 273.0757512 | 273.0754 | -1.27 | Protosappanin A |
| compound00288 | 0.77 | M+H | C6H11NO2 | 130.0862552 | 130.0862 | -0.16 | Pipecolinic acid |
| compound00289 | 4.49 | M+FA-H | C32H42O16 | 727.2454698 | 727.2458 | 0.41 | Pinoresinol Diglucoside |
| compound00290 | 5.15 | M-H | C14H12O4 | 243.0662823 | 243.0663 | -0.08 | Piceatannol |
| compound00291 | 4.69 | M-H | C21H20O9 | 415.1034566 | 415.1038 | 0.79 | Neopuerarin A |
| compound00292 | 4.79 | M+FA-H | C14H20O6 | 329.1241682 | 329.1243 | 0.51 | Phenylethyl-beta-D-galactoside |
| compound00293 | 1.19 | M-H | C14H18O9 | 329.0878059 | 329.0879 | 0.19 | Phaseoloidin |
| compound00294 | 3.91 | M-H | C19H24O13 | 459.1144146 | 459.1145 | 0.19 | Parishin E |
| compound00295 | 4.22 | M+FA-H | C32H40O19 | 773.2146141 | 773.2141 | -0.72 | Parishin B |
| compound00296 | 5.13 | M+H | C14H12O4 | 245.0808355 | 245.0808 | -0.23 | Oxyresveratrol |
| compound00297 | 8.89 | M+H | C16H14O5 | 287.0914012 | 287.0911 | -1.2 | Oxypeucedanin |
| compound00298 | 5.04 | M-H | C10H10O3 | 177.055714 | 177.0551 | -3.69 | Osmundacetone |
| compound00299 | 3.75 | M-H | C19H28O12 | 447.1508005 | 447.1511 | 0.64 | Orcinol gentiobioside |
| compound00300 | 5.61 | M+Na | C22H22O9 | 453.115634 | 453.115 | -1.35 | Ononin |
| compound00301 | 8.74 | M+Na | C47H80O17 | 939.5288037 | 939.5275 | -1.39 | Notoginsenoside Fe |
| compound00302 | 7.31 | M-H | C15H10O5 | 269.0455477 | 269.0457 | 0.71 | Norwogonin |
| compound00303 | 9.15 | M+Na | C17H12O4 | 303.0627994 | 303.0625 | -0.86 | Nortanshinone |
| compound00304 | 1.17 | M+H-H2O, M+H | C11H13NO6 | 256.0815645 | 256.0813 | -0.89 | Nicotinic acid riboside |
| compound00305 | 9.15 | M+NH4 | C10H18O | 172.1696083 | 172.1694 | -0.98 | Nerol |
| compound00306 | 4.73 | M+FA-H | C26H30O13 | 595.1668184 | 595.1672 | 0.57 | Liquiritigenin-7-o-apiosyl(1-2)-glucoside |
| compound00307 | 1.01 | M+H | C5H5N5O | 152.0566883 | 152.0564 | -2.01 | Guanine |
| compound00308 | 9.7 | M-H | C21H22O4 | 337.1445338 | 337.1449 | 1 | Licochalcone C |
| compound00309 | 0.96 | M-H | C6H8O8 | 207.0146388 | 207.0142 | -1.94 | Hydroxycitric acid |
| compound00310 | 3.96 | 2M-H | C16H14O6 | 603.1507979 | 603.1496 | -1.94 | Hematoxylin |
| compound00311 | 6.7 | M-H | C16H10O6 | 297.0404624 | 297.0407 | 0.78 | Hedysarimcoumestan B |
| compound00312 | 4.76 | M+NH4 | C13H14N2O | 232.1444438 | 232.1444 | -0.29 | Harmaline |
| compound00313 | 8.4 | M+H | C48H82O18 | 947.5573929 | 947.5568 | -0.67 | Gypenoside XVII |
| compound00314 | 9.91 | M+FA-H | C42H72O13 | 829.4953381 | 829.4982 | 3.49 | Gypenoside LXXV |
| compound00315 | 8.76 | M+FA-H | C47H80O17 | 961.5376708 | 961.5394 | 1.85 | Gynostemma Extract |
| compound00316 | 4.72 | M-H | C27H30O16 | 609.1461099 | 609.147 | 1.44 | Rutin |
| compound00317 | 4.66 | M-H2O-H | C26H28O15 | 561.1249924 | 561.1254 | 0.7 | Graveobioside A |
| compound00318 | 4 | M+H-H2O | C33H40O23 | 787.1927323 | 787.1919 | -1 | Gossypetin 3-sophoroside-8-glucoside |
| compound00319 | 0.84 | M+K | C4H8N2O3 | 171.016673 | 171.0166 | -0.58 | Glycylglycine |
| compound00320 | 3.88 | M-H | C14H18O8 | 313.0928915 | 313.093 | 0.42 | Glucovanillin |
| compound00321 | 0.87 | M+FA-H | C6H12O6 | 225.0616453 | 225.0614 | -1.21 | Glucose |
| compound00322 | 7.92 | M-H, M+FA-H | C48H82O18 | 991.5481997 | 991.5508 | 2.64 | Ginsenoside Rd |
| compound00323 | 9.5 | M+FA-H | C42H72O13 | 829.495361 | 829.4978 | 2.98 | Ginsenoside F2 |
| compound00324 | 5.11 | M-H | C20H24O10 | 423.1296698 | 423.1294 | -0.76 | Ginkgolide J |
| compound00325 | 4.84 | M+H | C10H13NO2 | 180.1019051 | 180.1019 | -0.02 | Fusaric acid |
| compound00326 | 3.71 | M+H | C6H8O3 | 129.0546209 | 129.0546 | -0.37 | Furaneol |
| compound00327 | 7.96 | M+Na | C16H26O4 | 305.1723696 | 305.1718 | -1.72 | Fumagillol |
| compound00328 | 12.98 | M+NH4 | C42H58O6 | 676.4572466 | 676.4542 | -4.52 | Fucoxanthin |
| compound00329 | 4.46 | M-H | C21H22O11 | 449.1089362 | 449.1094 | 1.06 | Flavanomarein |
| compound00330 | 5.52 | M+H | C15H10O6 | 287.0550158 | 287.0546 | -1.36 | Fisetin |
| compound00331 | 6.64 | M+H | C11H12O4 | 209.0808347 | 209.081 | 0.62 | Ferulic acid methyl ester |
| compound00332 | 9.1 | M+FA-H | C34H32N4O4-2 | 605.2406198 | 605.2398 | -1.36 | Ferroheme |
| compound00333 | 5.79 | 2M-H | C9H10O3 | 331.118712 | 331.1187 | 0.07 | Ethyl vanillin |
| compound00334 | 4.94 | M+H-H2O, M+H | C9H10O5 | 181.0495326 | 181.0495 | -0.15 | Ethyl gallate |
| compound00335 | 5.77 | M-H2O-H | C9H10O4 | 163.0399917 | 163.0393 | -3.99 | Ethyl 3,4-dihydroxybenzoate |
| compound00336 | 3.91 | M+Na | C15H16O9 | 363.0686776 | 363.0683 | -1.08 | Esculin |
| compound00337 | 4.37 | 2M-H | C9H6O4 | 355.0459387 | 355.0452 | -2.16 | Esculetin |
| compound00338 | 0.95 | M+FA-H | C6H8O6 | 221.0303563 | 221.03 | -1.46 | Erythorbic acid |
| compound00339 | 4.46 | M+H-H2O | C9H12O3 | 151.0753641 | 151.0754 | 0.48 | Homovanillyl alcohol |
| compound00340 | 0.97 | M-H | C6H6O7 | 189.0040731 | 189.0035 | -2.98 | Hydroxycitric acid lactone |
| compound00341 | 9.74 | M+H | C21H22O4 | 339.1590881 | 339.1583 | -2.43 | Licochalcone A |
| compound00342 | 0.9 | M+H | C4H7NO4 | 134.044785 | 134.0447 | -0.84 | Iminodiacetic acid |
| compound00343 | 0.87 | M-H2O-H, M-H | C6H10O5 | 161.0455421 | 161.0448 | -4.83 | Levoglucosan |
| compound00344 | 4.76 | M-H | C26H28O15 | 579.1355461 | 579.1369 | 2.29 | Leucoside |
| compound00345 | 4.5 | M-H | C12H24N2O3 | 243.171416 | 243.1714 | -0.2 | Leu-Leu |
| compound00346 | 1.83 | M+H | C9H18N2O3 | 203.139019 | 203.139 | -0.07 | Leu-ala |
| compound00347 | 5.71 | M+Na | C20H24O6 | 383.1465525 | 383.1458 | -1.89 | Lariciresinol |
| compound00348 | 0.92 | M-H | C12H22O12 | 357.10385 | 357.104 | 0.33 | Lactobionic acid |
| compound00349 | 10.12 | M+H | C45H44O11 | 761.2956396 | 761.295 | -0.9 | Kuwanon H |
| compound00350 | 10.58 | M+H | C25H28O6 | 425.1958642 | 425.1962 | 0.85 | Kuwanon E |
| compound00351 | 4.9 | M+H, M+Na | C27H30O15 | 595.1657473 | 595.1654 | -0.56 | Kaempferol-3-O-glucorhamnoside |
| compound00352 | 4.78 | M+FA-H | C27H30O15 | 639.1566924 | 639.1564 | -0.43 | Kaempferol 3-neohesperidoside |
| compound00353 | 5.02 | M-H, 2M-H | C20H18O10 | 417.0827214 | 417.0832 | 1.04 | Kaempferol 3-arabinofuranoside |
| compound00354 | 4.97 | M+NH4, M+Na, M+K, M+H, M+H-H2O | C20H18O10 | 441.0792259 | 441.0791 | -0.37 | Kaempferol 3-alpha-L-arabinopyranoside |
| compound00355 | 4.13 | M+H | C27H30O16 | 611.16066 | 611.1614 | 1.25 | Kaempferol 3,7-Di-o-glucoside |
| compound00356 | 4.38 | M+H | C8H8O4 | 169.0495346 | 169.0496 | 0.53 | Isovanillic acid |
| compound00357 | 5.01 | M+H | C10H8O4 | 193.0495347 | 193.0496 | 0.45 | Isoscopoletin |
| compound00358 | 4.9 | M+H-H2O, M+H | C21H24O9 | 421.1493086 | 421.1494 | 0.21 | Isorhapontin |
| compound00359 | 5.12 | M+Na | C22H22O12 | 501.1003561 | 501.1002 | -0.4 | Isorhamnetin-3-O-glucoside |
| compound00360 | 7.01 | M-H | C45H72O17 | 883.469673 | 883.4684 | -1.42 | Isoproprotogracillin B |
| compound00361 | 4.9 | M+H | C15H12O6 | 289.0706654 | 289.0704 | -0.84 | Isookanin |
| compound00362 | 1.13 | M+H | C6H6N2O | 123.0552899 | 123.0552 | -0.65 | Isonicotinamide |
| compound00363 | 8.04 | M+H | C17H18O5 | 303.1227013 | 303.1223 | -1.19 | Isomucronulatol |
| compound00364 | 4.97 | M-H2O-H | C23H26O11 | 459.1296911 | 459.1302 | 1.08 | Isolindleyin |
| compound00365 | 9.76 | M-H2O-H | C20H18O6 | 335.0925141 | 335.0928 | 0.89 | Isolicoflavonol |
| compound00366 | 4.51 | M+Na | C21H22O10 | 457.1105122 | 457.1106 | 0.24 | Isocoreopsin |
| compound00367 | 9.15 | M+H | C43H70O15 | 827.478749 | 827.4779 | -1.01 | Isoastragaloside II |
| compound00368 | 9.92 | M+Na | C45H72O16 | 891.4712691 | 891.4708 | -0.53 | Isoastragaloside I |
| compound00369 | 5.03 | M+H | C17H18O6 | 319.1176148 | 319.1176 | -0.1 | Isoagarotetrol |
| compound00370 | 4.09 | M-H | C19H20O10 | 407.0983658 | 407.0965 | -4.61 | Iriflophenone 3-C-glucoside |
| compound00371 | 5.28 | M-H | C24H26O13 | 521.1300653 | 521.1305 | 0.8 | Iridin |
| compound00372 | 5.23 | M+Na | C16H28O7 | 355.1727496 | 355.1724 | -1.12 | Rosiridin |
| compound00373 | 3.69 | M+FA-H | C13H18O7 | 331.1034161 | 331.1037 | 0.88 | Salicin |
| compound00374 | 3.89 | M+Na | C14H20O7 | 323.1101284 | 323.1101 | -0.21 | Salidroside |
| compound00375 | 0.76 | 2M-H | C15H26O13 | 827.2674063 | 827.2682 | 0.95 | Xylotriose |
| compound00376 | 9.47 | M-H | C21H22O6 | 369.1343626 | 369.1346 | 0.6 | Xanthohumol D |
| compound00377 | 10.41 | 2M-H | C21H22O5 | 707.2861737 | 707.2879 | 2.47 | Xanthohumol |
| compound00378 | 4.94 | M+H-H2O | C13H20O3 | 207.1379567 | 207.138 | 0.03 | Vomifoliol |
| compound00379 | 5.91 | M+H | C9H10O3 | 167.0702705 | 167.0703 | 0.07 | Veratraldehyde |
| compound00380 | 9.35 | M-H | C20H18O7 | 369.0979769 | 369.0981 | 0.37 | Uralenol |
| compound00381 | 5.24 | M+FA-H | C9H6O3 | 207.0300059 | 207.0295 | -2.42 | Umbelliferone |
| compound00382 | 4.71 | M+FA-H | C8H15NO | 186.1137184 | 186.1131 | -3.37 | Tropine |
| compound00383 | 10.73 | M+H | C18H15O4P | 327.0780739 | 327.0775 | -1.83 | Triphenyl phosphate |
| compound00384 | 10.8 | M+H | C17H18O3 | 271.1328724 | 271.1325 | -1.52 | Trimethoxyresveratrol |
| compound00385 | 5.04 | M+H, M+Na | C21H20O11 | 449.1078376 | 449.108 | 0.32 | Trifolin |
| compound00386 | 6.11 | M-H | C20H24O9 | 407.1347566 | 407.135 | 0.65 | Torachrysone-8-O-beta-D-glucoside |
| compound00387 | 8.6 | M+FA-H | C25H26N2O3 | 447.1924433 | 447.1935 | 2.27 | TMC-58B |
| compound00388 | 4.12 | M+Na | C17H24O9 | 395.1312602 | 395.1311 | -0.31 | Syringin |
| compound00389 | 5.08 | M-H | C9H10O4 | 181.0506291 | 181.05 | -3.21 | Syringaldehyde |
| compound00390 | 4.81 | M+FA-H | C22H22O10 | 491.1194542 | 491.12 | 1.01 | Swertisin |
| compound00391 | 4.39 | M-H | C16H22O9 | 357.1191071 | 357.1195 | 1.2 | Sweroside |
| compound00392 | 0.97 | M+H | C7H13NO2 | 144.1019056 | 144.1018 | -0.54 | Stachydrine |
| compound00393 | 0.78 | M+H | C7H9N3O2 | 168.0767535 | 168.0767 | -0.51 | Spinacine |
| compound00394 | 8.8 | M-H | C47H76O17 | 911.5009768 | 911.503 | 2.22 | Soysaponin II |
| compound00395 | 8.19 | M-H | C21H20O6 | 367.1187123 | 367.1189 | 0.41 | Sophoflavescenol |
| compound00396 | 4.25 | M+H-H2O | C22H30O14 | 501.1601845 | 501.1577 | -4.88 | Sibiricose A5 |
| compound00397 | 0.86 | M+K | C7H14O6 | 233.0422142 | 233.0421 | -0.46 | Sequoyitol |
| compound00398 | 5.73 | M+Na, M+K, M+H-H2O | C12H16O4 | 247.0940954 | 247.0939 | -0.68 | Senkyunolide I |
| compound00399 | 4.56 | M-H2O-H | C17H24O11 | 385.1140419 | 385.1145 | 1.13 | Secoxyloganin |
| compound00400 | 5.7 | M-H | C15H10O6 | 285.0404624 | 285.0407 | 0.83 | Scutellarein |
| compound00401 | 9.59 | M+Na | C24H32O7 | 455.2040426 | 455.2037 | -0.81 | Schisandrin |
| compound00402 | 5.58 | M+H-H2O | C16H14O5 | 269.08081 | 269.0804 | -1.49 | Sappanchalcone |
| compound00403 | 10.62 | M-H | C25H28O6 | 423.1813135 | 423.1818 | 1.26 | Sanggenol A |
| compound00404 | 4.85 | M-H | C14H6O8 | 300.998991 | 300.9991 | 0.25 | Ellagic acid |
| compound00405 | 5.07 | M+Na | C28H36O13 | 603.2048253 | 603.2045 | -0.58 | Episyringaresinol 4'-O-beta-D-glncopyranoside |
| compound00406 | 10.62 | M+H | C20H26O3 | 315.1954746 | 315.1944 | -3.43 | beta-Estradiol 17-acetate |
| compound00407 | 4.65 | M+H | C33H53NO8 | 592.3843935 | 592.3847 | 0.55 | Edpetiline |
| compound00408 | 4.12 | M+Na | C21H27N2O4+ | 394.1863328 | 394.1858 | -1.3 | Echitaminic acid |
| compound00409 | 6.44 | M-H2O-H | C17H18O7 | 315.0874394 | 315.0879 | 1.45 | Byakangelicin |
| compound00410 | 6.34 | M+FA-H | C42H70O14 | 843.4746593 | 843.4765 | 2.23 | Bupleuroside XIII |
| compound00411 | 8.34 | M+H, M+Na | C48H78O18 | 943.5260909 | 943.5272 | 1.19 | Buddlejasaponin IVb |
| compound00412 | 4.33 | M+H | C20H26O9 | 411.1649637 | 411.163 | -4.87 | Bruceine D |
| compound00413 | 4.45 | M+H | C24H45NO10 | 508.3116227 | 508.3118 | 0.35 | Broussonetine A |
| compound00414 | 10.83 | M-H | C25H26O6 | 421.1656633 | 421.1661 | 1.13 | Broussoflavonol F |
| compound00415 | 9.57 | M+H | C20H26O5 | 347.185305 | 347.1837 | -4.65 | Brevilin A |
| compound00416 | 9.68 | M-H | C12H20O2 | 195.1390508 | 195.1385 | -2.63 | Bornyl acetate |
| compound00417 | 7.01 | M+K | C16H22O11 | 429.0791763 | 429.0813 | 4.96 | beta-D-Glucose pentaacetate |
| compound00418 | 9.83 | M+H | C17H16O4 | 285.1121361 | 285.1119 | -0.68 | Batatasin I |
| compound00419 | 5.13 | M+H | C16H12O7 | 317.0655798 | 317.0654 | -0.63 | Azaleatin |
| compound00420 | 5.08 | M-H2O-H | C20H18O11 | 415.0670936 | 415.0676 | 1.23 | Avicularin |
| compound00421 | 9.83 | M+Na, M+K, M+H | C27H28N2O4 | 467.194144 | 467.1938 | -0.69 | Aurantiamide acetic acid |
| compound00422 | 7.4 | M+FA-H | C47H78O19 | 991.5118766 | 991.5131 | 1.26 | Astragaloside VI |
| compound00423 | 7.91 | M+H | C41H68O14 | 785.468183 | 785.4684 | 0.25 | Astragaloside IV |
| compound00424 | 8.62 | M+H, M+Na | C43H70O15 | 849.4607233 | 849.4596 | -1.35 | Astragaloside II |
| compound00425 | 4.96 | M+H, M+Na | C21H22O11 | 451.1234878 | 451.1236 | 0.14 | Astilbin |
| compound00426 | 9.42 | M+Na | C30H48O5 | 511.3394051 | 511.3392 | -0.42 | Arjunolic acid |
| compound00427 | 5.28 | 2M-H | C9H10O3 | 331.1187123 | 331.1188 | 0.39 | Apocynin |
| compound00428 | 4.49 | M-H2O-H | C20H28O12 | 441.1402326 | 441.1402 | -0.14 | Apiopaeonoside |
| compound00429 | 4.71 | M-H | C25H26O13 | 533.1300659 | 533.1308 | 1.45 | Apigenin-6-C-beta-D-xylopyranosyl-8-C-alpha-L-arabinopyranoside |
| compound00430 | 5.14 | M+H-H2O | C9H12O4 | 167.0702743 | 167.0703 | 0.22 | Antiarol |
| compound00431 | 4.23 | M+H, M+K, M+NH4, M+Na | C20H27NO11 | 480.1476481 | 480.1473 | -0.73 | Amygdalin |
| compound00432 | 7.11 | M+Na | C16H14O4 | 293.0784365 | 293.0783 | -0.3 | Alpinetin |
| compound00433 | 1.42 | M+FA-H | C12H16O7 | 317.087745 | 317.0882 | 1.35 | alpha-Arbutin |
| compound00434 | 0.83 | M-H, M+FA-H | C6H14O6 | 181.0717585 | 181.0712 | -3.23 | Allitol |
| compound00435 | 11.77 | M+Na | C30H48O4 | 495.3445013 | 495.3441 | -0.89 | Alisol G |
| compound00436 | 6.98 | M+H-H2O | C15H26O2 | 221.1899785 | 221.1898 | -0.79 | Alismoxide |
| compound00437 | 9.7 | M-H | C34H22O8 | 557.1241922 | 557.1247 | 0.97 | Albanol B |
| compound00438 | 2.62 | M+H | C9H18N2O3 | 203.1390179 | 203.1392 | 0.92 | Alanyleucine |
| compound00439 | 5.4 | M-H | C15H12O5 | 271.0611974 | 271.0613 | 0.39 | Butin |
| compound00440 | 10.04 | M+H | C20H28O3 | 317.2111232 | 317.2105 | -1.98 | Cafestol |
| compound00441 | 4.61 | M-H | C9H6O3 | 161.0244131 | 161.0237 | -4.47 | 7-Hydroxychromone |
| compound00442 | 4.91 | M+H | C23H26O11 | 479.1547893 | 479.1542 | -1.16 | Calceolarioside B |
| compound00443 | 6.71 | M+H | C16H14O4 | 271.0964863 | 271.0962 | -0.96 | Echinatin |
| compound00444 | 4.72 | M+K | C11H14N4O4 | 305.0645461 | 305.0655 | 3 | Doxofylline |
| compound00445 | 5.04 | M+H | C28H32O15 | 609.1813983 | 609.1804 | -1.57 | Diosmin |
| compound00446 | 6.47 | M+H | C12H12O5 | 237.07575 | 237.0757 | -0.06 | Dimethylfraxetin |
| compound00447 | 5 | M+Na | C11H16O4 | 235.0940714 | 235.0942 | 0.36 | Dihydrosinapyl alcohol |
| compound00448 | 4.57 | M+H-H2O | C15H12O8 | 303.0499281 | 303.0499 | -0.06 | Dihydromyricetin |
| compound00449 | 8.21 | M+K | C15H16O5 | 315.0629933 | 315.0625 | -1.58 | Dihydromethysticin |
| compound00450 | 5.3 | M+H-H2O | C9H8O2 | 131.0491314 | 131.0491 | -0.58 | Dihydrocoumarin |
| compound00451 | 5.89 | M+H, M+Na | C28H34O14 | 595.2021331 | 595.2016 | -0.92 | Didymin |
| compound00452 | 0.95 | M+H | C8H17NO2 | 160.133206 | 160.1331 | -0.79 | delta-Valerobetaine |
| compound00453 | 9.23 | M+H | C48H76O18 | 941.5104426 | 941.5099 | -0.53 | Dehydrosoyasaponin I |
| compound00454 | 8.47 | M-H | C28H36O10 | 531.2235719 | 531.2241 | 0.98 | Dehydroandrographolide succinic acid |
| compound00455 | 5.99 | M+FA-H | C15H10O4 | 299.0561057 | 299.0561 | 0.13 | Daidzein |
| compound00456 | 0.99 | M+Na | C7H14O7 | 233.0631807 | 233.0631 | -0.31 | D-altrofurano-heptulose-3 |
| compound00457 | 0.96 | M+H | C9H13N3O5 | 244.0927977 | 244.0926 | -0.75 | Cytarabine |
| compound00458 | 0.91 | M+H, M+Na | C8H15NO6 | 244.0791776 | 244.079 | -0.86 | Cyclic N-Acetyl-D-mannosamine |
| compound00459 | 10.88 | M+Na, M+K, M+H | C19H20O3 | 297.1485221 | 297.1482 | -1.15 | Cryptotanshinone |
| compound00460 | 4.17 | M+FA-H | C11H20O6 | 293.1242 | 293.1241 | -0.19 | Crenulatin |
| compound00461 | 11.99 | M+FA-H | C27H22O18 | 679.0788508 | 679.0783 | -0.76 | Corilagin |
| compound00462 | 4.86 | M+H-H2O | C10H12O3 | 163.0753424 | 163.0752 | -0.8 | Coniferyl alcohol |
| compound00463 | 4.03 | M+Na | C16H22O8 | 365.1206942 | 365.1206 | -0.25 | Coniferin |
| compound00464 | 10.12 | M+H | C12H18O2 | 195.1379565 | 195.1379 | -0.26 | Cnidilide |
| compound00465 | 3.91 | M-H | C21H28O13 | 487.145715 | 487.1459 | 0.45 | Cistanoside F |
| compound00466 | 4.54 | M+Na | C22H28O11 | 491.1523647 | 491.1527 | 0.77 | Cimifugin 4'-O-beta-D-glucopyranoside |
| compound00467 | 8.02 | M+H | C42H66O14 | 795.4525352 | 795.451 | -1.92 | Chikusetsusaponin Iva |
| compound00468 | 10.33 | M+Na | C20H22O5 | 365.1359682 | 365.1356 | -1.03 | Chicanin |
| compound00469 | 0.91 | M+H | C6H10N2O5 | 191.0662488 | 191.0661 | -0.89 | Carglumic acid |
| compound00470 | 4.73 | M+H-H2O | C32H38O19 | 709.1974362 | 709.1972 | -0.27 | Camelliaside B |
| compound00471 | 4.55 | M+H-H2O | C33H40O20 | 739.2080088 | 739.2082 | 0.2 | Camelliaside A |
| compound00472 | 5.11 | M-H | C28H36O13 | 579.2083151 | 579.2085 | 0.37 | Acanthoside B |
| compound00473 | 6.42 | M+H | C11H10O4 | 207.065185 | 207.0652 | 0.22 | 7,8-Dimethoxycoumarin |
| compound00474 | 5.64 | M+H | C15H10O4 | 255.0651866 | 255.0648 | -1.36 | 7,4'-Dihydroxyflavone |
| compound00475 | 10.51 | M+H-H2O | C17H14O5 | 281.080824 | 281.0806 | -0.67 | 7,4'-Di-O-methylapigenin |
| compound00476 | 7.14 | M+H | C18H16O8 | 361.0917951 | 361.0914 | -1.19 | 6-Methoxytricin |
| compound00477 | 5.55 | M-H | C15H10O5 | 269.0455462 | 269.0453 | -0.79 | 6,7,4'-Trihydroxyisoflavone |
| compound00478 | 4.99 | M+FA-H | C16H18O7 | 367.1034244 | 367.1037 | 0.7 | 5-O-Cinnamoylquinic acid |
| compound00479 | 4.56 | M-H2O-H | C10H10O5 | 191.0349366 | 191.0345 | -2.4 | 5-Hydroxyferulic acid |
| compound00480 | 5.99 | M-H | C17H14O6 | 313.0717621 | 313.0719 | 0.32 | 5,7-Dimethoxyluteolin |
| compound00481 | 4.92 | M-H | C9H6O4 | 177.019329 | 177.0188 | -3.21 | 5,7-Dihydroxycoumarin |
| compound00482 | 1.16 | M+H-H2O, M+H | C9H13NO2 | 150.0913354 | 150.0913 | -0.3 | 4-Synephrine |
| compound00483 | 1.67 | M-H | C8H8O4 | 167.0349787 | 167.0344 | -3.61 | 4-Hydroxymandelic acid |
| compound00484 | 0.94 | M+H | C7H7NO2 | 138.0549559 | 138.0548 | -1 | 3-Pyridineacetic acid |
| compound00485 | 6.77 | M+Na | C36H58O12 | 705.3819749 | 705.3842 | 3.18 | 3-O-Beta-D-Glucopyranosylplatycodigenin |
| compound00486 | 1.31 | M-H | C9H11NO3 | 180.0666132 | 180.066 | -3.51 | 3-Hydroxyphenylalanine |
| compound00487 | 9.89 | M-H | C12H24O3 | 215.1652669 | 215.165 | -1.26 | 3-Hydroxydodecanoic acid |
| compound00488 | 8.12 | M-H | C10H20O3 | 187.1339653 | 187.1334 | -2.79 | 3-Hydroxycapric acid |
| compound00489 | 6.11 | M+FA-H | C15H10O5 | 315.0509962 | 315.0512 | 0.67 | 3,7,4'-Trihydroxyflavone |
| compound00490 | 4.95 | M+FA-H | C25H24O12 | 561.1249318 | 561.1255 | 1.05 | 3,4-Dicaffeoylquinic acid |
| compound00491 | 2.38 | M+H | C5H9NO | 100.0756906 | 100.0757 | -0.21 | 2-Piperidone |
| compound00492 | 5.23 | M+H-H2O | C8H8O3 | 135.0440407 | 135.0439 | -0.89 | 2-Methoxybenzoic acid |
| compound00493 | 6.63 | M-H | C8H16O3 | 159.1026632 | 159.1019 | -4.7 | 2-Hydroxyoctanoic acid |
| compound00494 | 4.65 | M+FA-H | C8H6O3 | 195.0300364 | 195.0294 | -3.1 | 2-Carboxybenzaldehyde |
| compound00495 | 5.63 | M+H | C9H10O4 | 183.0651859 | 183.0651 | -0.65 | 2',5'-dihydroxy-4'-methoxyacetophenone |
| compound00496 | 9.52 | M+H-H2O | C20H28O3 | 299.2005455 | 299.2004 | -0.65 | 15-Hydroxydehydroabietic acid |
| compound00497 | 5.77 | M+FA-H | C48H80O19 | 1005.527465 | 1005.5301 | 2.63 | 11-Oxomogroside III |
| compound00498 | 4.54 | M+H | C12H14N2O2 | 219.1128033 | 219.113 | 0.85 | 1-Methyl-L-tryptophan |
| compound00499 | 0.91 | M+NH4 | C5H6N2O2 | 144.0767664 | 144.0767 | -0.74 | 1-Imidazoleacetic Acid |
| compound00500 | 0.94 | M+FA-H | C6H10O6 | 223.046016 | 223.0456 | -1.67 | 1,4-D-Gulonolactone |
| compound00501 | 9.92 | M+Na | C42H72O13 | 807.4865182 | 807.4863 | -0.22 | (20R)-Ginsenoside Rg3 |
| compound00502 | 6.16 | M+FA-H | C20H22O7 | 419.1346964 | 419.1353 | 1.32 | (+)-Nortrachelogenin |
| compound00503 | 5.66 | M-H | C45H74O17 | 885.4853264 | 885.487 | 1.91 | osladin |
| compound00504 | 4.84 | M+FA-H | C26H20O10 | 537.1037893 | 537.1045 | 1.34 | isosalvianolic acid c |
| compound00505 | 4.07 | M-H | C15H18O9 | 341.087806 | 341.0879 | 0.28 | 6-O-caffeoyl-D-glucopyranose |
| compound00506 | 4.83 | M+H | C15H12O4 | 257.0808361 | 257.0806 | -0.76 | (2R)-7-hydroxy-2-(4-hydroxyphenyl)chroman-4-one |
| compound00507 | 4.69 | M-H | C17H14O6 | 313.0717624 | 313.072 | 0.63 | 3-acetoxy-5,7-dihydroxyflavanone |
| compound00508 | 5.41 | M+FA-H | C42H72O14 | 845.490306 | 845.4923 | 2.31 | gynoside b |
| compound00509 | 6.37 | M-H | C48H72O21 | 983.4493353 | 983.4517 | 2.39 | licoricesaponin a3 |
| compound00510 | 6.58 | M+FA-H | C31H36O10 | 613.228972 | 613.23 | 1.74 | Lappaol D |
| compound00511 | 7.23 | M+Na | C20H34O6 | 393.224782 | 393.2244 | -0.98 | kalmanol |
| compound00512 | 4.57 | M-H2O-H | C33H40O20 | 737.1934928 | 737.1951 | 2.12 | kaempferol-3-rhamnosyl glucoside-7-glucoside |
| compound00513 | 0.86 | M+H-H2O | C36H36O17 | 723.1920255 | 723.1948 | 3.77 | isovitexin 2''-o-(6'''-(e)-p-coumaroyl)glucoside |
| compound00514 | 0.86 | M+Na | C24H42O21 | 689.2110963 | 689.2106 | -0.75 | isolychnose |
| compound00515 | 5.04 | M+FA-H | C18H16O6 | 373.0928603 | 373.0931 | 0.69 | isoamericanin a |
| compound00516 | 10.87 | M+K | C34H36O7 | 595.2092965 | 595.2088 | -0.9 | ingenol-3,20-dibenzoate |
| compound00517 | 4.36 | M+FA-H | C18H26O10 | 447.1507551 | 447.1512 | 0.99 | icariside f2 |
| compound00518 | 7.25 | M+FA-H | C41H66O13 | 811.4484445 | 811.4503 | 2.23 | HN saponin F |
| compound00519 | 1.32 | M-H2O-H | C6H10O7 | 175.0247495 | 175.0242 | -3.26 | hexuronate |
| compound00520 | 8.78 | M+NH4 | C16H30O2 | 272.2584261 | 272.2581 | -1.13 | Hexadec-10-enoic acid |
| compound00521 | 5.12 | M+H, M+Na | C28H34O15 | 611.1970457 | 611.1977 | 1.12 | hesperidin chalcone |
| compound00522 | 7.01 | M+H-H2O, M+H | C42H72O13 | 767.4939924 | 767.4935 | -0.69 | Gypenoside XXXVIII |
| compound00523 | 10.5 | M+H | C22H26O5 | 371.1853017 | 371.1848 | -1.33 | glyasperins D |
| compound00524 | 7.82 | M+FA-H | C33H56O14 | 721.3651043 | 721.3668 | 2.33 | Gingerglycolipid A |
| compound00525 | 4.43 | M-H | C27H32O16 | 611.1617599 | 611.1626 | 1.4 | Flavoplatycoside |
| compound00526 | 11.9 | M+NH4 | C18H30O | 280.2635109 | 280.2632 | -1.1 | Farnesylacetone |
| compound00527 | 7.58 | M+Na | C48H74O21 | 1009.461505 | 1009.4604 | -1.08 | esculentoside G |
| compound00528 | 8.92 | M+K | C37H44O17 | 799.2210471 | 799.2202 | -1 | epimedoside |
| compound00529 | 8.22 | M+Na | C42H64O15 | 831.4137564 | 831.4132 | -0.62 | Deoxoglycyrrhizin |
| compound00530 | 4.46 | 2M-H | C15H16O9 | 679.1515862 | 679.1505 | -1.54 | Daphnetin glucoside |
| compound00531 | 1.36 | M-H2O-H | C5H10O6 | 147.0298024 | 147.0291 | -4.97 | D-Arabonate |
| compound00532 | 7.43 | M+H-H2O | C36H54O11 | 645.3633156 | 645.363 | -0.51 | Cristatain |
| compound00533 | 5.47 | M+FA-H | C18H16O6 | 373.0928821 | 373.093 | 0.2 | cirsilneol |
| compound00534 | 5.57 | M+H-H2O | C47H74O18 | 909.4841696 | 909.4811 | -3.39 | Chikusetsu saponin Ib |
| compound00535 | 12.62 | M+H-H2O, M+H | C18H32O2 | 281.2475075 | 281.2473 | -0.79 | chaulmoogric acid |
| compound00536 | 3.72 | M-H2O-H | C23H32O12 | 481.1715546 | 481.172 | 1.01 | celephtalide b |
| compound00537 | 4.98 | M-H, M+FA-H | C20H20O9 | 449.108867 | 449.1095 | 1.51 | Cassiaside A |
| compound00538 | 6.88 | M+H, M+NH4 | C42H62O17 | 839.4059771 | 839.4058 | -0.17 | licoricesaponine g2 |
| compound00539 | 4.79 | M-H | C26H30O13 | 549.1613657 | 549.1619 | 1.06 | Licraside |
| compound00540 | 6.95 | M+NH4, M+Na | C39H66O18 | 845.4141204 | 845.4147 | 0.68 | loquatifolin A |
| compound00541 | 7.99 | M+H-H2O | C30H48O5 | 471.3468767 | 471.3466 | -0.57 | maesagenin a |
| compound00542 | 5.13 | M+H | C33H55NO8 | 594.4000445 | 594.3998 | -0.38 | zhebeininoside |
| compound00543 | 0.77 | M+FA-H | C30H52O26 | 873.2727741 | 873.2749 | 2.46 | verbascose |
| compound00544 | 7.91 | M-H2O-H | C45H74O18 | 883.4697174 | 883.4717 | 2.26 | tubeimoside e |
| compound00545 | 4.13 | M-H | C19H18O11 | 421.0776303 | 421.0757 | -4.63 | Tripteroside |
| compound00546 | 1.15 | M+H-H2O | C4H9NO3 | 102.0549518 | 102.0549 | -0.18 | Theronine |
| compound00547 | 7.5 | M+H-H2O | C30H48O6 | 487.3417871 | 487.3414 | -0.82 | Theasapogenol E |
| compound00548 | 5.6 | M+FA-H | C43H32O20 | 913.146927 | 913.1463 | -0.68 | Theaflavine-3,3-digallate |
| compound00549 | 4.9 | M+H | C33H53NO8 | 592.3843946 | 592.3841 | -0.48 | STOCK1N-49993 |
| compound00550 | 1.02 | M+Na | C24H42O21 | 689.2110965 | 689.2106 | -0.76 | sesamose |
| compound00551 | 5.82 | M+H-H2O | C10H10O4 | 177.0546138 | 177.0545 | -0.4 | scabrans G5 qt |
| compound00552 | 8.37 | M-H | C48H76O19 | 955.4908062 | 955.4931 | 2.37 | sandosaponin b |
| compound00553 | 5.4 | M-H2O-H | C27H22O12 | 519.0933012 | 519.0937 | 0.85 | salvianolic acid j |
| compound00554 | 5.28 | M-H | C30H30O14 | 613.1562805 | 613.157 | 1.25 | safflomin-C |
| compound00555 | 5.67 | M+H | C17H14O8 | 347.0761452 | 347.0757 | -1.37 | Quercetagetin 3,4'-dimethyl ether |
| compound00556 | 5.18 | M-H2O-H | C18H14O8 | 339.0510292 | 339.0511 | 0.15 | PSOROMICACID |
| compound00557 | 3.13 | M+H, M+Na | C27H32O16 | 635.1582751 | 635.1577 | -0.85 | polygalaxanthone vii |
| compound00558 | 3.88 | M+FA-H | C26H30O15 | 627.1566079 | 627.1575 | 1.45 | polygalaxanthone v |
| compound00559 | 5.47 | M-H2O-H | C21H24O10 | 417.1191189 | 417.1194 | 0.69 | Phlorizine |
| compound00560 | 3.96 | M+H-H2O, M+H | C20H22O9 | 407.1336594 | 407.1334 | -0.7 | Oxyresveratrol 3-O-D-Glucopyranoside |
| compound00561 | 0.96 | M+NH4 | C12H18O8 | 308.1340102 | 308.1337 | -0.95 | OSMUNDALIN |
| compound00562 | 4.09 | M+FA-H | C19H28O11 | 477.1613303 | 477.1617 | 0.76 | Osmanthuside H |
| compound00563 | 5.91 | M+H, M+Na | C42H64O16 | 825.4267133 | 825.426 | -0.9 | Oleanane-2H, +2O, 1COOH, O-HexA-HexA |
| compound00564 | 3.25 | M+FA-H | C20H24O12 | 501.1249198 | 501.1256 | 1.32 | o-[β-d-xylopyranosyl(1→6)β-d-gluco-pyranosyl] 7-hydroxycoumarin |
| compound00565 | 3.12 | M+H-H2O, M+H | C21H22O11 | 451.123489 | 451.123 | -1.07 | neocarthamin |
| compound00566 | 4.37 | M+FA-H | C33H42O19 | 787.2301272 | 787.232 | 2.33 | Naringin 4'-glucoside |
| compound00567 | 6.92 | M+H-H2O, M+Na | C12H14O3 | 189.0910035 | 189.091 | -0.15 | narchinol a |
| compound00568 | 8.28 | M-H2O-H | C48H76O21 | 969.4701041 | 969.4719 | 1.88 | medicagenic acid 3-o-triglucoside |
| compound00569 | 8.03 | M-H | C51H84O21 | 1031.543235 | 1031.5454 | 2.09 | Malonylginsenoside Rd |
| compound00570 | 7.12 | M-H | C57H94O26 | 1193.596058 | 1193.5981 | 1.72 | malonyl-ginsenoside Rb1 |
| compound00571 | 0.9 | M+H | C4H9NO2 | 104.0706051 | 104.0706 | -0.16 | Carbocreatine |
| compound00572 | 7.21 | M-H2O-H | C48H76O20 | 953.4751915 | 953.4771 | 1.99 | Calendasaponin B |
| compound00573 | 4.25 | M+H-H2O | C9H14O5 | 185.0808369 | 185.0809 | 0.09 | buergerinin b |
| compound00574 | 5.74 | M+H | C15H12O5 | 273.0757512 | 273.0754 | -1.25 | (2S)-dihydrobaicalein |
| compound00575 | 5.7 | M-H2O-H | C36H32O16 | 701.151226 | 701.1524 | 1.69 | (2R)-2-[3-[(2S,3S)-3-[(1S)-1-carboxy-2-(3,4-dihydroxyphenyl)ethoxy]carbonyl-2-(3,4-dihydroxyphenyl)-7-hydroxy-2,3-dihydro-1-benzofuran-4-yl]propanoyloxy]-3-(3,4-dihydroxyphenyl)propanoic acid |
| compound00576 | 4.59 | M-H2O-H | C8H8O4 | 149.0243305 | 149.0236 | -4.58 | (3S)-3-acetyl-6-methylpyran-2,4-dione |
| compound00577 | 4.07 | M-H | C19H28O11 | 431.1558853 | 431.1559 | 0.03 | Benzyl b-sophoropyranoside |
| compound00578 | 5.67 | M+H-H2O, M+H | C17H14O6 | 297.0757319 | 297.0754 | -1.06 | (Z)-3-[2-[(E)-2-(3,4-dihydroxyphenyl)vinyl]-3,4-dihydroxy-phenyl]acrylic acid |
| compound00579 | 9.22 | M+FA-H | C43H70O15 | 871.4695549 | 871.4719 | 2.65 | astragalosideII |
| compound00580 | 3.83 | M-H | C22H30O14 | 517.1562802 | 517.1568 | 0.97 | Arillatose B |
| compound00581 | 4.22 | M-H2O-H | C20H24O12 | 437.1089383 | 437.109 | 0.17 | apiosylskimmin |
| compound00582 | 4.88 | M-H2O-H | C33H40O19 | 721.1985954 | 721.2008 | 3.02 | Apigenin 7-O-(2G-rhamnosyl)gentiobioside |
| compound00583 | 3.59 | M-H | C20H28O13 | 475.1457154 | 475.1461 | 0.9 | Amygdalinic acid |
| compound00584 | 5.79 | M+H, M+Na | C28H28O17 | 637.1399266 | 637.1395 | -0.7 | Acacetin-7-glucurono-(1-2)-glucuronide |
| compound00585 | 7.31 | M+FA-H | C43H64O16 | 881.4175712 | 881.4189 | 1.5 | abrusoside b |
| compound00586 | 8.4 | M+H-H2O | C30H48O3 | 439.3570494 | 439.3568 | -0.46 | Abrisapogenol J |
| compound00587 | 5.38 | M+H-H2O, M+H | C30H48O2 | 423.3621234 | 423.3616 | -1.12 | Abrisapogenol F |
| compound00588 | 12.58 | M+H-H2O, M+H, M+NH4 | C18H32O | 282.2791619 | 282.2788 | -1.15 | a linoleate group |
| compound00589 | 5.97 | M+H, M+Na | C23H28O10 | 487.1574743 | 487.1573 | -0.28 | 9,10-dimethoxy-pterocarpane-3-o-beta-d-glucoside |
| compound00590 | 5.67 | M-H | C21H20O9 | 415.1034564 | 415.1037 | 0.66 | 7-hydroxy-2-(4-hydroxyphenyl)-8-[(2S,3R,4R,5S,6R)-3,4,5-trihydroxy-6-methylol-tetrahydropyran-2-yl]chromone |
| compound00591 | 6.17 | M+K | C35H36O17 | 767.1584496 | 767.1576 | -1.07 | 6'-p-hydroxybenzoylspinosin |
| compound00592 | 2.61 | M-H2O-H | C20H20O11 | 417.0826295 | 417.0806 | -4.78 | 6'-o-caffeylerigeroside |
| compound00593 | 1.71 | M+H-H2O | C6H11NO4 | 144.0655121 | 144.0654 | -0.44 | 5-Methyl DL-glutamate |
| compound00594 | 5.27 | M-H2O-H, M+FA-H | C17H14O6 | 359.0771953 | 359.0776 | 1.02 | 5,3',4'-Trihydroxy-7-methoxy-6-methylflavone |
| compound00595 | 15.46 | M+NH4 | C5H8O | 102.0913312 | 102.0914 | 0.51 | 4-Methyl-2,3-dihydrofuran |
| compound00596 | 2.69 | M+FA-H | C8H6O3 | 195.0300355 | 195.0294 | -3.08 | 3a,4-Dihydro-2-benzofuran-1,3-dione |
| compound00597 | 9.41 | M+H-H2O, M+H | C37H58O9 | 629.4047826 | 629.4043 | -0.74 | 3-O-β-D-glucuronopyranoside-6-O-methyl ester |
| compound00598 | 8.28 | M-H | C42H64O15 | 807.4172476 | 807.4194 | 2.69 | 3-O-beta-D-Glucuronopyranosyl gypsogenin |
| compound00599 | 2.58 | M-H2O-H | C8H10O5 | 167.0349124 | 167.0343 | -3.68 | 3-hydroxy-vanillic acid |
| compound00600 | 3.78 | M-H2O-H | C6H13NO5 | 160.0614518 | 160.0608 | -4.18 | 3-amino-6-(hydroxymethyl)oxane-2,4,5-triol |
| compound00601 | 5.85 | M-H | C12H14O5 | 237.0768466 | 237.0767 | -0.51 | 3,4,5-trimethoxyl cinnamic acid |
| compound00602 | 3.96 | M-H, 2M-H, M+FA-H | C26H32O14 | 613.177457 | 613.1768 | -1.08 | 2,3,5,4'-tetrahydroxystilbene-2-o-(6''-o-alpha-d-glucopyranosyl)-beta-d-glucopyranoside |
| compound00603 | 10.28 | M+H | C18H24O2 | 273.1849077 | 273.1846 | -1.2 | 17-estradiol |
| compound00604 | 5.04 | M+Na | C20H26O7 | 401.1570066 | 401.1582 | 2.92 | 13,14-epoxide 9,11,12-hydroxytriptolide |
| compound00605 | 8.04 | M+Na | C48H82O18 | 969.5393533 | 969.5386 | -0.73 | 11-dehydroxymogroside Ⅲ |
| compound00606 | 4.07 | M+FA-H | C26H30O14 | 611.1617046 | 611.1624 | 1.2 | 10-o-e-feruloylmonotropein |
| compound00607 | 0.91 | M+H-H2O, M+H | C10H19NO8 | 282.1183441 | 282.118 | -1.12 | β- glucosidase |

**Supplementary Table 2** The 40 Prototype constituents.

| **No.** | **Retention time (min)** | **Adducts** | **Formula** | **theoretical m/z** | **m/z** | **Mass Error (ppm)** | **Metabolites** |
| --- | --- | --- | --- | --- | --- | --- | --- |
| compound00001 | 5.38 | M+H | C48H82O18 | 430.3315716 | 430.3312 | -0.47 | Peiminine |
| compound00003 | 7.01 | M+H, M+Na | C21H20O12 | 1153.601046 | 1153.6035 | 0.45 | Ginsenoside Rb1 |
| compound00004 | 5.2 | M-H, M+FA-H | C19H30O8 | 432.3472215 | 432.3469 | 0.81 | Peimine |
| compound00005 | 4.65 | M-H, M+FA-H | C14H17NO6 | 340.1037637 | 340.104 | 0.59 | Prunasin |
| compound00006 | 5.2 | M+Na | C47H80O18 | 955.5236981 | 955.5232 | -0.51 | Notoginsenoside R1 |
| compound00008 | 5.82 | M+H | C27H45NO3 | 432.3472214 | 432.3469 | -0.68 | Isoverticine |
| compound00009 | 5.07 | M-H | C16H12O4 | 428.3159213 | 428.3156 | 0.5 | Peimisine |
| compound00010 | 5.38 | M+H | C17H14O7 | 991.5482061 | 991.5507 | -1.11 | Ginsenoside Re |
| compound00011 | 7.01 | M+H, M+NH4, M+Na | C36H54O10 | 425.377782 | 425.3775 | -0.51 | Tamarixol |
| compound00012 | 7.4 | M+FA-H | C36H60O8 | 683.4374958 | 683.4389 | 2.34 | Ginsenoside Rh1 |
| compound00013 | 7.01 | M+FA-H | C48H82O18 | 407.3672179 | 407.367 | 2.5 | cimicifugenol |
| compound00014 | 10.38 | M-H, M+FA-H | C54H92O23 | 315.1590871 | 315.1586 | 2.13 | Neocryptotanshinone |
| compound00016 | 9.32 | M+H | C16H12O5 | 299.1641718 | 299.1639 | -1.32 | 8-geranyl-7-hydroxycoumarin |
| compound00018 | 4.29 | M+FA-H | C36H62O9 | 593.1511253 | 593.152 | 2.01 | Puerarin apioside |
| compound00020 | 7.21 | M+FA-H | C26H28O13 | 829.4953651 | 829.4978 | 1.52 | 20(R)-Ginsenoside Rg2 |
| compound00021 | 5.22 | M+H | C27H41NO3 | 753.4783389 | 753.4777 | -0.65 | notoginsenosider2 |
| compound00022 | 9.55 | M+H-H2O, M+H | C27H43NO3 | 665.4269165 | 665.4285 | -0.93 | Ginsenoside Rh4 |
| compound00023 | 7.42 | M+H-H2O, M+H | C27H45NO3 | 661.428621 | 661.4281 | -0.74 | Mogroside I E1 |
| compound00026 | 7.07 | M+Na | C21H20O10 | 793.4708833 | 793.4702 | -1.8 | Ginsenoside F5 |
| compound00030 | 5.17 | M+H-H2O, M+Na, M+H | C19H22O4 | 1007.543102 | 1007.5461 | -1.47 | curculigosaponin K |
| compound00031 | 7.7 | M+Na | C36H62O9 | 269.0808106 | 269.0804 | -0.73 | Helichrysetin |
| compound00032 | 7.01 | M+Na | C36H62O9 | 605.4411673 | 605.4407 | -0.88 | 20(S)-Ginsenoside Rh2 |
| compound00037 | 9.8 | M+H-H2O, M+H | C16H14O5 | 647.3789749 | 647.3786 | -1.45 | Glycyrrhetic acid 3-O-beta-D-glucuronide |
| compound00041 | 8.14 | M+Na | C36H60O8 | 247.0964861 | 247.0963 | -0.99 | Lomatin |
| compound00042 | 4.72 | M-H, M+FA-H | C42H72O13 | 444.3108405 | 444.3107 | 2.89 | Scoparinol |
| compound00044 | 4.82 | M+Na | C41H70O13 | 465.1027521 | 465.103 | -0.88 | Hyperoside |
| compound00054 | 6.82 | M+Na | C18H16O5 | 947.5573927 | 947.5569 | -1.29 | 11-Deoxymogroside IIIE |
| compound00057 | 8.01 | M+H-H2O | C16H14O7 | 443.3883485 | 443.3881 | -1.31 | (2S,4aS,5R,6R,8aS)-5-[(3E,7E,11E)-13-hydroxy-4,8,12-trimethyltrideca-3,7,11-trienyl]-1,1,4a,6-tetramethyldecalin-2,6-diol |
| compound00058 | 8.22 | M+H-H2O, M+H | C30H50O2 | 335.0890239 | 335.0886 | -0.63 | 5,7,8-Trimethoxyflavone |
| compound00059 | 7.92 | M+NH4 | C27H38O4 | 453.3363228 | 453.3358 | -0.29 | Neokadsuranic acid B |
| compound00060 | 8.05 | M+H-H2O | C41H70O13 | 661.4286245 | 661.428 | -0.89 | Mogroside I A1 |
| compound00061 | 5.57 | M+H-H2O, M+H | C30H44O3 | 455.0949088 | 455.0941 | -1.09 | Oroxin A |
| compound00062 | 6.1 | M+H | C14H14O4 | 301.0706422 | 301.0702 | -0.7 | Isorhambin |
| compound00063 | 6.17 | M+FA-H | C41H70O13 | 285.0757512 | 285.0754 | 2.38 | Calycosin |
| compound00064 | 8.02 | M-H, M+FA-H | C48H82O19 | 587.4305992 | 587.43 | 2.93 | 2-(Hydroxymethyl)-6-[[12-hydroxy-4,4,8,10,14-pentamethyl-17-(6-methylhepta-2,5-dien-2-yl)-2,3,5,6,7,9,11,12,13,15,16,17-dodecahydro-1H-cyclopenta[a]phenanthren-3-yl]oxy]oxane-3,4,5-triol |
| compound00065 | 5.99 | M+H | C19H22O3 | 815.4797382 | 815.4817 | -0.82 | Gypenoside XXI |
| compound00066 | 7.21 | M+H-H2O | C36H62O8 | 331.0812303 | 331.0809 | -0.79 | Iristectorigenin A |
| compound00067 | 9.51 | M+H-H2O | C36H60O7 | 643.4180622 | 643.4174 | -0.99 | Ginsenoside Rk3 |
| compound00068 | 7.69 | M+H-H2O | C30H52O3 | 267.0662829 | 267.0664 | -0.51 | Isoformononetin |
| compound00069 | 4.47 | M+H-H2O | C30H48O | 431.1922342 | 431.1926 | -0.59 | Roseoside |

**Supplementary Table 2** The 29 Types of metabolites

| **No.** | **Retention time (min)** | **Adducts** | **Formula** | **theoretical m/z** | **m/z** | **Mass Error (ppm)** | **Metabolites** |
| --- | --- | --- | --- | --- | --- | --- | --- |
| compound00002 | 4.15 | M-H | C9H8O7S | 258.9917974 | 258.9919 | 0.26 | 3-O-Caffeoylquinic acid methyl ester_M1 |
| compound00007 | 4.1 | M-H | C9H8O6S | 242.9968819 | 242.9967 | -0.67 | Methyl p-coumarate_M1 |
| compound00015 | 4.07 | M-H | C9H6O7S | 256.9761473 | 256.9762 | 0.17 | Esculetin_M1 |
| compound00017 | 4.26 | M-H | C9H6O6S | 240.9812318 | 240.9811 | -0.65 | Umbelliferone_M1 |
| compound00019 | 4.49 | M-H | C26H29N3O12S | 606.1399199 | 606.1411 | 1.97 | Norwogonin_M1-1 |
| compound00024 | 4.42 | M-H | C20H20O13S | 499.0551858 | 499.0555 | 0.54 | Oxyresveratrol_M1 |
| compound00025 | 5.45 | M-H | C21H18O14S | 525.0344513 | 525.0352 | 1.44 | Oroxylin A_M1 |
| compound00027 | 4.46 | M+H | C26H29N3O12S | 608.1544716 | 608.154 | -0.81 | Norwogonin_M1-2 |
| compound00028 | 5.34 | M+Na | C28H28O18 | 675.1167986 | 675.1164 | -0.6 | Rhamnocitrin_M1-2 |
| compound00029 | 10.82 | M-H | C19H20O4 | 311.1288832 | 311.1291 | 0.54 | Neocryptotanshinone_M1 |
| compound00033 | 5.91 | M+H, M+Na | C23H24O11 | 499.12113 | 499.1201 | -2.08 | Methylnissolin_M1 |
| compound00034 | 4.86 | M+Na | C21H20O10 | 455.0948859 | 455.0945 | -0.8 | Liquiritigenin_M1 |
| compound00035 | 5.37 | M-H | C28H28O18 | 651.1202895 | 651.1215 | 1.88 | Rhamnocitrin_M1-1 |
| compound00036 | 5.18 | M-H | C18H24O10 | 399.129671 | 399.1299 | 0.47 | Senkyunolide H_M1 |
| compound00038 | 11.4 | M+H-H2O | C30H46O4 | 453.3363152 | 453.3361 | -0.38 | Wilforlide A_M1 |
| compound00039 | 5.85 | M-H | C23H26O11 | 477.1402359 | 477.1406 | 0.72 | Isomucronulatol_M1 |
| compound00040 | 2.61 | M-H | C7H6O7S | 232.9761468 | 232.9761 | -0.34 | 2,5-Dihydroxybenzaldehyde_M1 |
| compound00043 | 6.47 | M-H | C13H16O5 | 251.0924972 | 251.0925 | 0.02 | Citrinin_M1 |
| compound00045 | 4.86 | M+Na | C27H26O16 | 629.1113321 | 629.1106 | -1.16 | 3,4'-Dihydroxyflavone_M1 |
| compound00046 | 5.01 | M+Na | C22H20O12 | 499.0847222 | 499.0842 | -1.11 | Fisetin_M1 |
| compound00047 | 4.37 | M-H | C10H8O7S | 270.9917979 | 270.992 | 0.77 | Esculetin_M2 |
| compound00048 | 5.04 | M-H2O-H | C16H14O10S | 379.0129469 | 379.0134 | 1.07 | Dihydrotamarixetin_M1 |
| compound00049 | 5.46 | M+H, M+Na | C21H22O10 | 457.1105469 | 457.11 | -1.27 | Dehydro-alpha-lapachone_M1 |
| compound00050 | 5.77 | M+FA-H | C11H12O6S | 317.0336745 | 317.0336 | -0.28 | Ethyl p-methoxycinnamic acid_M1 |
| compound00051 | 4.65 | M+Na | C14H15NO7 | 332.0740934 | 332.0738 | -0.91 | 6-Hydroxyindole_M1 |
| compound00052 | 4.56 | M-H | C9H6O7S | 256.9761475 | 256.9763 | 0.41 | 6-Hydroxycoumarin_M1 |
| compound00053 | 5.12 | M+Na | C28H28O17 | 659.1218854 | 659.1214 | -0.66 | 3,7-Dimethylgalangin_M1 |
| compound00055 | 5.58 | M-H | C9H10O5S | 229.0176168 | 229.0173 | -1.17 | 4-Allylcatechol_M1 |
| compound00056 | 5.92 | M+Na | C18H24O9 | 407.1312659 | 407.131 | -0.56 | 3-N-butyl-4,5-dihydrophthalide_M1 |

**Supplementary Table 3** The662 Biological Processes.

| **Category** | **Term** | **Count** | **%** | **PValue** | **Genes** | **List Total** | **Pop Hits** | **Pop Total** | **Fold Enrichment** | **Bonferroni** | **Benjamini** | **FDR** |
| --- | --- | --- | --- | --- | --- | --- | --- | --- | --- | --- | --- | --- |
| GOTERM_BP_DIRECT | GO:0009410~response to xenobiotic stimulus | 30 | 21.27659574 | 1.31E-25 | RET, ABCB1, SRC, HTR2A, TYMS, PTGS2, TNF, SLC6A4, CCND1, CASP3, ABL1, ABCC1, HSP90AA1, ACE, STAT1, ARG1, MMP2, IGFBP2, SOD2, PGF, ADAM17, RPS6KB1, CDK4, APEX1, BCL2, CDK1, MDM2, PPARG, TOP1, TP73 | 141 | 277 | 19453 | 14.94200783 | 3.38E-22 | 3.38E-22 | 3.01E-22 |
| GOTERM_BP_DIRECT | GO:0043066~negative regulation of apoptotic process | 37 | 26.24113475 | 6.51E-25 | GSK3B, HDAC1, SRC, GSTP1, TNF, EGFR, AURKA, IGF1R, IKBKB, MAPK8, CASP3, BAG1, KDR, PIM1, AKT1, MCL1, NQO1, HSPA5, DAPK1, PLK1, ANXA5, BRAF, MIF, SOD2, MMP9, TGFBR1, IL2, PTK2, VEGFA, HCK, RPS6KB1, ALB, BCL2, CDK1, MDM2, RAF1, HSPA1A | 141 | 540 | 19453 | 9.453125821 | 1.68E-21 | 8.42E-22 | 7.50E-22 |
| GOTERM_BP_DIRECT | GO:0006468~protein phosphorylation | 32 | 22.69503546 | 4.89E-22 | RET, GSK3B, SRC, AURKA, IKBKB, MAPK8, EDNRA, CHEK1, ABL1, PIM1, NEK1, AKT1, MAPK1, MAP2K1, SYK, DAPK1, PDPK1, IGFBP3, PLK1, BRAF, TGFBR1, PTK2, MAPK10, HCK, BMP2, CDK6, CCNE1, CDK4, CDK2, CDK1, RAF1, FGFR1 | 141 | 444 | 19453 | 9.943390199 | 1.26E-18 | 4.22E-19 | 3.76E-19 |
| GOTERM_BP_DIRECT | GO:0043410~positive regulation of MAPK cascade | 21 | 14.89361702 | 8.77E-19 | ALK, RET, MAP2K1, FLT1, SYK, FLT3, CHRNA7, IGFBP3, MMP8, FGF2, TNF, TGFBR1, IGF1R, VEGFA, BMP2, KIT, KDR, TLR9, RAF1, FGFR1, TP73 | 141 | 172 | 19453 | 16.84450767 | 2.27E-15 | 5.67E-16 | 5.06E-16 |
| GOTERM_BP_DIRECT | GO:0051897~positive regulation of protein kinase B signaling | 21 | 14.89361702 | 3.78E-18 | RET, HSP90AA1, FLT1, FLT3, PDPK1, SRC, FGF2, TNF, EGFR, TGFBR1, PIK3CG, PTK2, IGF1R, VEGFA, SELP, PIK3CA, KIT, KDR, NOX4, MET, FGFR1 | 141 | 185 | 19453 | 15.66083956 | 9.77E-15 | 1.95E-15 | 1.74E-15 |
| GOTERM_BP_DIRECT | GO:0008284~positive regulation of cell proliferation | 30 | 21.27659574 | 1.95E-17 | FLT1, FLT3, HDAC1, CHRNA7, ODC1, HTR2A, FGF1, FGF2, EGFR, IGF1R, CXCR3, CXCR2, KDR, AKT1, MIF, F2, TGFBR1, IL2, PGF, PTK2, VEGFA, HCK, BMP2, ADAM17, CDK4, KIT, CDK2, BCL2, MDM2, FGFR1 | 141 | 545 | 19453 | 7.594378294 | 5.04E-14 | 8.39E-15 | 7.48E-15 |
| GOTERM_BP_DIRECT | GO:0007165~signal transduction | 42 | 29.78723404 | 2.45E-16 | RET, ALK, GSK3B, SRC, CHRNA7, FGF1, NR3C1, FGF2, EGFR, IGF1R, TYMP, CCND3, MAPK8, EDNRA, TTR, PLAU, CXCR2, AKT1, MAPK1, MAP2K1, DAPK1, STAT1, IGFBP2, ANXA5, STAT3, BRAF, MAPK14, ESR1, TGFBR1, PGF, ESR2, MAPK10, CDK6, RPS6KB1, CDK4, KIT, CDK2, PPARG, PGR, RAF1, MET, HSPA1A | 141 | 1307 | 19453 | 4.433443488 | 5.74E-13 | 9.06E-14 | 8.07E-14 |
| GOTERM_BP_DIRECT | GO:0046777~protein autophosphorylation | 19 | 13.4751773 | 1.07E-15 | ALK, GSK3B, FLT1, SYK, DAPK1, FLT3, PDPK1, SRC, EGFR, PTK2, AURKA, IGF1R, HCK, KIT, PIM1, KDR, ABL1, AKT1, FGFR1 | 141 | 182 | 19453 | 14.40289143 | 2.87E-12 | 3.36E-13 | 3.00E-13 |
| GOTERM_BP_DIRECT | GO:0010629~negative regulation of gene expression | 23 | 16.31205674 | 1.17E-15 | YAP1, GSK3B, ACE, NOS2, HDAC1, SRC, STAT3, MIF, MMP8, FGF2, ESR1, TNF, AURKA, VEGFA, BMP2, TERT, PIK3CA, KDR, CDK1, AKT1, PGR, PPARG, XDH | 141 | 319 | 19453 | 9.947286511 | 3.16E-12 | 3.36E-13 | 3.00E-13 |
| GOTERM_BP_DIRECT | GO:0001934~positive regulation of protein phosphorylation | 20 | 14.18439716 | 3.20E-15 | HSP90AA1, CHRNA7, BRAF, F2, FGF1, FGF2, TNF, MMP9, EGFR, PGF, PTK2, VEGFA, CCND3, BMP2, ADAM17, CCND1, KDR, ABL1, AKT1, RAF1 | 141 | 226 | 19453 | 12.20925124 | 8.33E-12 | 8.29E-13 | 7.39E-13 |
| Top 10 | | | | | | | | | | | | |
| GOTERM_BP_DIRECT | GO:0010628~positive regulation of gene expression | 27 | 19.14893617 | 5.05E-15 | RET, YAP1, GSK3B, HDAC1, FGF1, FGF2, TNF, SLC6A4, MAPK8, AKT1, MAPK1, MAP2K1, NOS3, STAT3, BRAF, MAPK14, MMP8, TGFBR1, VEGFA, BMP2, CDK6, CDK1, TLR9, MDM2, PPARG, PGR, HSPA1A | 141 | 519 | 19453 | 7.17734596 | 1.32E-11 | 1.19E-12 | 1.06E-12 |
| GOTERM_BP_DIRECT | GO:0043406~positive regulation of MAP kinase activity | 14 | 9.929078014 | 9.81E-15 | FLT1, FLT3, SRC, MIF, HTR2A, FGF1, FGF2, TNF, EGFR, PIK3CG, VEGFA, KIT, NOX4, FGFR1 | 141 | 77 | 19453 | 25.08446164 | 2.53E-11 | 1.97E-12 | 1.76E-12 |
| GOTERM_BP_DIRECT | GO:0001666~response to hypoxia | 18 | 12.76595745 | 9.90E-15 | ACE, NOS2, CHRNA7, MMP2, CXCR4, PLAT, SOD2, TNF, PGF, SLC6A4, VEGFA, MMP14, BMP2, ADAM17, EDNRA, PLAU, CASP3, PPARA | 141 | 176 | 19453 | 14.11000967 | 2.56E-11 | 1.97E-12 | 1.76E-12 |
| GOTERM_BP_DIRECT | GO:0030335~positive regulation of cell migration | 20 | 14.18439716 | 6.70E-14 | RET, FLT1, HSPA5, MMP2, STAT3, CXCR4, FGF1, SOD2, MMP9, EGFR, TGFBR1, PTK2, IGF1R, VEGFA, MMP14, BMP2, ADAM17, PLAU, KIT, KDR | 141 | 267 | 19453 | 10.3344224 | 1.73E-10 | 1.24E-11 | 1.10E-11 |
| GOTERM_BP_DIRECT | GO:0018105~peptidyl-serine phosphorylation | 17 | 12.05673759 | 3.27E-13 | GSK3B, SYK, PDPK1, SRC, PLK1, MAPK14, TGFBR1, AURKA, IKBKB, MAPK8, RPS6KB1, CDK2, BCL2, CDK1, AKT1, MAPK1, TOP1 | 141 | 184 | 19453 | 12.74672371 | 8.46E-10 | 5.64E-11 | 5.03E-11 |
| GOTERM_BP_DIRECT | GO:0043065~positive regulation of apoptotic process | 21 | 14.89361702 | 4.02E-13 | TOP2A, ACE, DAPK1, SRC, MMP2, IGFBP3, TRPV1, PTGS2, TNF, MMP9, TGFBR1, CASP7, BMP2, MAPK8, CASP3, BCL2, ABL1, CYP1B1, PPARG, MCL1, TP73 | 141 | 336 | 19453 | 8.622783688 | 1.04E-09 | 6.18E-11 | 5.50E-11 |
| GOTERM_BP_DIRECT | GO:0014068~positive regulation of phosphatidylinositol 3-kinase signaling | 13 | 9.219858156 | 4.06E-13 | FLT1, FLT3, SRC, F2, FGF2, TNF, PTK2, IGF1R, VEGFA, SELP, KIT, KDR, FGFR1 | 141 | 79 | 19453 | 22.70302541 | 1.05E-09 | 6.18E-11 | 5.50E-11 |
| GOTERM_BP_DIRECT | GO:0033138~positive regulation of peptidyl-serine phosphorylation | 13 | 9.219858156 | 3.03E-12 | HSP90AA1, CHRNA7, BRAF, MIF, PTGS2, TNF, EGFR, HDAC6, VEGFA, PIK3CA, BCL2, AKT1, RAF1 | 141 | 93 | 19453 | 19.28536567 | 7.84E-09 | 4.36E-10 | 3.88E-10 |
| GOTERM_BP_DIRECT | GO:0030574~collagen catabolic process | 10 | 7.092198582 | 1.15E-11 | MMP14, MMP13, MMP1, CTSL, MMP2, MMP3, MMP8, MMP9, CTSS, CTSB | 141 | 41 | 19453 | 33.64988756 | 2.98E-08 | 1.57E-09 | 1.40E-09 |
| GOTERM_BP_DIRECT | GO:0007169~transmembrane receptor protein tyrosine kinase signaling pathway | 14 | 9.929078014 | 1.97E-11 | ALK, RET, FLT1, SYK, FLT3, SRC, EGFR, PTK2, IGF1R, HCK, KIT, KDR, MET, FGFR1 | 141 | 137 | 19453 | 14.09856603 | 5.10E-08 | 2.55E-09 | 2.27E-09 |
| GOTERM_BP_DIRECT | GO:0000082~G1/S transition of mitotic cell cycle | 11 | 7.80141844 | 6.38E-11 | CCNA2, CCND3, CDK6, CCND1, RPS6KB1, CCNE1, CDK4, CDK2, BCL2, CDK1, CDC25A | 141 | 69 | 19453 | 21.9943468 | 1.65E-07 | 7.86E-09 | 7.00E-09 |
| GOTERM_BP_DIRECT | GO:0007173~epidermal growth factor receptor signaling pathway | 10 | 7.092198582 | 9.41E-11 | ADAM17, PIK3CA, PDPK1, SRC, ABL1, AKT1, BRAF, PTPN11, PTK2, EGFR | 141 | 51 | 19453 | 27.05187039 | 2.43E-07 | 1.10E-08 | 9.81E-09 |
| GOTERM_BP_DIRECT | GO:0006915~apoptotic process | 24 | 17.0212766 | 9.79E-11 | PARP1, DAPK1, IGFBP3, CXCR4, MAPK14, NR3C1, MMP9, TGFBR1, CTSS, AURKA, CASP7, RPS6KB1, CASP3, CXCR3, CHEK1, BAG1, MDM2, PIM1, BCL2, CDK1, MAPK1, RAF1, MCL1, TP73 | 141 | 619 | 19453 | 5.349190527 | 2.53E-07 | 1.10E-08 | 9.81E-09 |
| GOTERM_BP_DIRECT | GO:0070374~positive regulation of ERK1 and ERK2 cascade | 16 | 11.34751773 | 1.16E-10 | MAP2K1, SRC, CHRNA7, BRAF, PTPN11, MIF, HTR2A, FGF1, FGF2, TNF, EGFR, VEGFA, BMP2, KDR, ABL1, NOX4 | 141 | 230 | 19453 | 9.597533148 | 2.99E-07 | 1.25E-08 | 1.11E-08 |
| GOTERM_BP_DIRECT | GO:0045766~positive regulation of angiogenesis | 14 | 9.929078014 | 2.23E-10 | FLT1, NOS3, PDPK1, CHRNA7, STAT3, FGF1, FGF2, PGF, VEGFA, TERT, CXCR3, CXCR2, KDR, CYP1B1 | 141 | 166 | 19453 | 11.63556353 | 5.77E-07 | 2.31E-08 | 2.05E-08 |
| GOTERM_BP_DIRECT | GO:0018108~peptidyl-tyrosine phosphorylation | 10 | 7.092198582 | 3.15E-10 | HCK, FLT1, SYK, FLT3, SRC, ABL1, KDR, PTK2, EGFR, FGFR1 | 141 | 58 | 19453 | 23.78698948 | 8.16E-07 | 3.14E-08 | 2.80E-08 |
| GOTERM_BP_DIRECT | GO:0001525~angiogenesis | 16 | 11.34751773 | 4.89E-10 | FLT1, SYK, NOS3, MMP2, FGF1, PTGS2, MAPK14, PIK3CG, PTK2, TYMP, VEGFA, MMP14, PIK3CA, CXCR3, KDR, CYP1B1 | 141 | 255 | 19453 | 8.656598526 | 1.26E-06 | 4.68E-08 | 4.17E-08 |
| GOTERM_BP_DIRECT | GO:0071222~cellular response to lipopolysaccharide | 14 | 9.929078014 | 1.96E-09 | NOS2, SRC, ARG1, GSTP1, MMP3, MAPK14, MMP8, TNF, MMP9, CASP7, MAPK8, CDK4, ABL1, TLR9 | 141 | 198 | 19453 | 9.755068415 | 5.08E-06 | 1.81E-07 | 1.62E-07 |
| GOTERM_BP_DIRECT | GO:0033674~positive regulation of kinase activity | 10 | 7.092198582 | 2.32E-09 | RET, ALK, FLT1, FLT3, KIT, KDR, MET, EGFR, FGFR1, IGF1R | 141 | 72 | 19453 | 19.16174153 | 5.99E-06 | 2.07E-07 | 1.84E-07 |
| GOTERM_BP_DIRECT | GO:2000573~positive regulation of DNA biosynthetic process | 7 | 4.964539007 | 4.45E-09 | CCNA2, SRC, CYP1B1, NOX4, TNF, FGF2, VEGFA | 141 | 20 | 19453 | 48.28758865 | 1.15E-05 | 3.71E-07 | 3.31E-07 |
| GOTERM_BP_DIRECT | GO:0045737~positive regulation of cyclin-dependent protein serine/threonine kinase activity | 7 | 4.964539007 | 4.45E-09 | CCND3, ADAM17, CCND1, SRC, PIM1, AKT1, EGFR | 141 | 20 | 19453 | 48.28758865 | 1.15E-05 | 3.71E-07 | 3.31E-07 |
| GOTERM_BP_DIRECT | GO:0043491~protein kinase B signaling | 10 | 7.092198582 | 6.72E-09 | RPS6KB1, PIK3CA, STAT3, KDR, AKT1, HTR2A, TNF, FGF2, PIK3CG, IGF1R | 141 | 81 | 19453 | 17.03265914 | 1.74E-05 | 5.43E-07 | 4.84E-07 |
| GOTERM_BP_DIRECT | GO:0048661~positive regulation of smooth muscle cell proliferation | 9 | 6.382978723 | 8.33E-09 | RPS6KB1, PIK3CA, STAT1, HDAC1, AKT1, PTGS2, TNF, FGF2, IGF1R | 141 | 58 | 19453 | 21.40829054 | 2.15E-05 | 6.53E-07 | 5.82E-07 |
| GOTERM_BP_DIRECT | GO:0006954~inflammatory response | 18 | 12.76595745 | 1.66E-08 | NOS2, STAT3, CXCR4, MIF, PTGS2, SELE, TNF, PIK3CG, SELP, IKBKB, HCK, BMP2, CXCR3, KIT, CXCR2, TLR9, NOX4, AKT1 | 141 | 436 | 19453 | 5.69578372 | 4.30E-05 | 1.26E-06 | 1.13E-06 |
| GOTERM_BP_DIRECT | GO:0070301~cellular response to hydrogen peroxide | 9 | 6.382978723 | 3.40E-08 | NQO1, SRC, ARG1, APEX1, MDM2, CDK1, ABL1, CYP1B1, HDAC6 | 141 | 69 | 19453 | 17.99537465 | 8.79E-05 | 2.51E-06 | 2.24E-06 |
| GOTERM_BP_DIRECT | GO:0022617~extracellular matrix disassembly | 8 | 5.673758865 | 3.64E-08 | MMP14, MMP13, MMP1, MMP2, MMP3, MMP8, MMP9, CTSS | 141 | 46 | 19453 | 23.99383287 | 9.42E-05 | 2.62E-06 | 2.33E-06 |
| GOTERM_BP_DIRECT | GO:0045429~positive regulation of nitric oxide biosynthetic process | 8 | 5.673758865 | 4.25E-08 | HSP90AA1, AKT1, TRPV1, SOD2, MMP8, PTGS2, ESR1, TNF | 141 | 47 | 19453 | 23.48332579 | 1.10E-04 | 2.97E-06 | 2.65E-06 |
| GOTERM_BP_DIRECT | GO:0045944~positive regulation of transcription from RNA polymerase II promoter | 29 | 20.56737589 | 4.72E-08 | YAP1, TOP2A, HDAC1, FGF1, NR3C1, FGF2, TNF, EGFR, IKBKB, CXCR3, ABL1, AKT1, PARP1, STAT1, STAT3, MAPK14, ESR1, IL2, ESR2, VEGFA, BMP2, APEX1, TLR9, PPARG, PGR, RAF1, PPARA, MET, TP73 | 141 | 1232 | 19453 | 3.247541908 | 1.22E-04 | 3.09E-06 | 2.75E-06 |
| GOTERM_BP_DIRECT | GO:0032355~response to estradiol | 10 | 7.092198582 | 4.76E-08 | NQO1, CCND1, CASP3, STAT3, IGFBP2, CYP1B1, PTGS2, ESR1, CYP19A1, SLC6A4 | 141 | 101 | 19453 | 13.65985535 | 1.23E-04 | 3.09E-06 | 2.75E-06 |
| GOTERM_BP_DIRECT | GO:0018107~peptidyl-threonine phosphorylation | 9 | 6.382978723 | 4.78E-08 | GSK3B, MAPK8, PDPK1, CHEK1, BCL2, CDK1, MAPK1, AKT1, TGFBR1 | 141 | 72 | 19453 | 17.24556738 | 1.24E-04 | 3.09E-06 | 2.75E-06 |
| GOTERM_BP_DIRECT | GO:0042127~regulation of cell proliferation | 12 | 8.510638298 | 5.68E-08 | ALK, CCND3, NOS2, PLAU, FLT3, STAT1, STAT3, CHEK1, KIT, BRAF, PTK2, EGFR | 141 | 175 | 19453 | 9.460425532 | 1.47E-04 | 3.51E-06 | 3.13E-06 |
| GOTERM_BP_DIRECT | GO:0043536~positive regulation of blood vessel endothelial cell migration | 8 | 5.673758865 | 5.74E-08 | ADAM17, PDPK1, NOS3, KDR, AKT1, FGF2, FGFR1, VEGFA | 141 | 49 | 19453 | 22.5248227 | 1.48E-04 | 3.51E-06 | 3.13E-06 |
| GOTERM_BP_DIRECT | GO:0045893~positive regulation of transcription, DNA-templated | 22 | 15.60283688 | 5.83E-08 | YAP1, RET, MAP2K1, STAT1, HDAC1, SRC, STAT3, FGF2, ESR1, TNF, EGFR, TGFBR1, ESR2, CCNA2, IKBKB, BMP2, CDK2, PIM1, AKT1, PPARG, PPARA, TP73 | 141 | 728 | 19453 | 4.169258047 | 1.51E-04 | 3.51E-06 | 3.13E-06 |
| GOTERM_BP_DIRECT | GO:0048010~vascular endothelial growth factor receptor signaling pathway | 7 | 4.964539007 | 6.43E-08 | FLT1, SRC, KDR, MAPK14, PTK2, PGF, VEGFA | 141 | 30 | 19453 | 32.19172577 | 1.66E-04 | 3.78E-06 | 3.37E-06 |
| GOTERM_BP_DIRECT | GO:0048009~insulin-like growth factor receptor signaling pathway | 7 | 4.964539007 | 7.92E-08 | MAP2K1, PIK3CA, PDPK1, MAPK1, AKT1, RAF1, IGF1R | 141 | 31 | 19453 | 31.153283 | 2.05E-04 | 4.55E-06 | 4.06E-06 |
| GOTERM_BP_DIRECT | GO:0007275~multicellular organism development | 11 | 7.80141844 | 9.12E-08 | RET, ALK, FLT1, FLT3, KIT, PIM1, KDR, MET, EGFR, FGFR1, IGF1R | 141 | 144 | 19453 | 10.53895784 | 2.36E-04 | 5.13E-06 | 4.57E-06 |
| GOTERM_BP_DIRECT | GO:1902895~positive regulation of pri-miRNA transcription from RNA polymerase II promoter | 8 | 5.673758865 | 1.01E-07 | BMP2, TERT, STAT3, PPARG, NR3C1, TNF, FGF2, EGFR | 141 | 53 | 19453 | 20.82483608 | 2.60E-04 | 5.54E-06 | 4.93E-06 |
| GOTERM_BP_DIRECT | GO:0038084~vascular endothelial growth factor signaling pathway | 6 | 4.255319149 | 1.04E-07 | FLT1, PIK3CA, FLT3, KDR, PGF, VEGFA | 141 | 17 | 19453 | 48.69336671 | 2.68E-04 | 5.59E-06 | 4.98E-06 |
| GOTERM_BP_DIRECT | GO:0007568~aging | 11 | 7.80141844 | 1.11E-07 | NQO1, ACE, RPS6KB1, ARG1, APEX1, MMP2, IGFBP2, HTR2A, TYMS, PTGS2, FGF2 | 141 | 147 | 19453 | 10.32387707 | 2.87E-04 | 5.85E-06 | 5.21E-06 |
| GOTERM_BP_DIRECT | GO:0032496~response to lipopolysaccharide | 11 | 7.80141844 | 1.26E-07 | SELP, NQO1, ADAM17, ACE, RPS6KB1, NOS2, NOS3, CASP3, SOD2, PTGS2, SELE | 141 | 149 | 19453 | 10.18530154 | 3.25E-04 | 6.51E-06 | 5.80E-06 |
| GOTERM_BP_DIRECT | GO:0090398~cellular senescence | 8 | 5.673758865 | 1.68E-07 | MAPK10, MAP2K1, MAPK8, CDK2, ABL1, MIF, MAPK14, IGF1R | 141 | 57 | 19453 | 19.36344407 | 4.36E-04 | 8.54E-06 | 7.61E-06 |
| GOTERM_BP_DIRECT | GO:0000086~G2/M transition of mitotic cell cycle | 8 | 5.673758865 | 1.90E-07 | CCNA2, ABCB1, PLK1, CHEK1, CDK2, CDK1, CDC25A, AURKA | 141 | 58 | 19453 | 19.02959159 | 4.92E-04 | 9.47E-06 | 8.44E-06 |
| GOTERM_BP_DIRECT | GO:0006508~proteolysis | 17 | 12.05673759 | 2.02E-07 | ACE, MMP1, MMP2, MMP3, PLAT, F2, MMP8, MMP9, CTSS, MMP14, CASP7, ADAM17, MMP13, CTSL, PLAU, CASP3, CTSB | 141 | 458 | 19453 | 5.120954505 | 5.23E-04 | 9.87E-06 | 8.79E-06 |
| GOTERM_BP_DIRECT | GO:0009612~response to mechanical stimulus | 8 | 5.673758865 | 2.15E-07 | MMP14, MAPK8, RPS6KB1, STAT1, SRC, MMP2, IGFBP2, PPARG | 141 | 59 | 19453 | 18.70705614 | 5.55E-04 | 1.03E-05 | 9.16E-06 |
| GOTERM_BP_DIRECT | GO:0042327~positive regulation of phosphorylation | 7 | 4.964539007 | 2.85E-07 | FLT1, FLT3, KIT, KDR, MIF, EGFR, VEGFA | 141 | 38 | 19453 | 25.41452034 | 7.37E-04 | 1.34E-05 | 1.19E-05 |
| GOTERM_BP_DIRECT | GO:0030307~positive regulation of cell growth | 9 | 6.382978723 | 3.29E-07 | YAP1, MMP14, ADAM17, BCL2, AKT1, F2, EGFR, TGFBR1, IL2 | 141 | 92 | 19453 | 13.49653099 | 8.52E-04 | 1.52E-05 | 1.35E-05 |
| GOTERM_BP_DIRECT | GO:0001937~negative regulation of endothelial cell proliferation | 7 | 4.964539007 | 3.35E-07 | SPARC, STAT1, ALOX5, CXCR3, TNF, XDH, TGFBR1 | 141 | 39 | 19453 | 24.76286598 | 8.66E-04 | 1.52E-05 | 1.35E-05 |
| GOTERM_BP_DIRECT | GO:0071392~cellular response to estradiol stimulus | 7 | 4.964539007 | 3.92E-07 | CCNA2, MMP2, SSTR2, ESR1, ESR2, EGFR, IGF1R | 141 | 40 | 19453 | 24.14379433 | 0.001012518 | 1.72E-05 | 1.53E-05 |
| GOTERM_BP_DIRECT | GO:1900182~positive regulation of protein localization to nucleus | 7 | 4.964539007 | 3.92E-07 | YAP1, PARP1, SRC, PLK1, CDK1, AKT1, F2 | 141 | 40 | 19453 | 24.14379433 | 0.001012518 | 1.72E-05 | 1.53E-05 |
| GOTERM_BP_DIRECT | GO:0038083~peptidyl-tyrosine autophosphorylation | 6 | 4.255319149 | 4.29E-07 | ALK, SRC, ABL1, KDR, EGFR, IGF1R | 141 | 22 | 19453 | 37.62669246 | 0.001108803 | 1.85E-05 | 1.65E-05 |
| GOTERM_BP_DIRECT | GO:0034599~cellular response to oxidative stress | 9 | 6.382978723 | 4.96E-07 | NQO1, EDNRA, ABCC1, MAPK8, PARP1, GSR, ABL1, SOD2, HSPA1A | 141 | 97 | 19453 | 12.80083352 | 0.00128276 | 2.10E-05 | 1.87E-05 |
| GOTERM_BP_DIRECT | GO:0010863~positive regulation of phospholipase C activity | 5 | 3.546099291 | 5.22E-07 | FLT1, KIT, ESR1, FGF2, FGFR1 | 141 | 10 | 19453 | 68.9822695 | 0.001349093 | 2.18E-05 | 1.94E-05 |
| GOTERM_BP_DIRECT | GO:0010595~positive regulation of endothelial cell migration | 8 | 5.673758865 | 5.78E-07 | SPARC, ABL1, KDR, AKT1, FGF1, FGF2, PIK3CG, VEGFA | 141 | 68 | 19453 | 16.23112224 | 0.001494546 | 2.37E-05 | 2.12E-05 |
| GOTERM_BP_DIRECT | GO:0032869~cellular response to insulin stimulus | 9 | 6.382978723 | 9.81E-07 | RPS6KB1, PIK3CA, PARP1, PDPK1, STAT1, SRC, CDK4, AKT1, PPARG | 141 | 106 | 19453 | 11.71397029 | 0.002533756 | 3.96E-05 | 3.53E-05 |
| GOTERM_BP_DIRECT | GO:0048538~thymus development | 7 | 4.964539007 | 1.19E-06 | MAP2K1, BCL2, ABL1, MAPK1, BRAF, RAF1, TGFBR1 | 141 | 48 | 19453 | 20.11982861 | 0.003084499 | 4.75E-05 | 4.23E-05 |
| GOTERM_BP_DIRECT | GO:0035556~intracellular signal transduction | 16 | 11.34751773 | 1.25E-06 | GSK3B, SYK, DAPK1, PDPK1, SRC, BRAF, MAPK14, TGFBR1, MAPK10, HCK, MAPK8, KIT, CHEK1, AKT1, MAPK1, RAF1 | 141 | 462 | 19453 | 4.777992693 | 0.003219137 | 4.89E-05 | 4.35E-05 |
| GOTERM_BP_DIRECT | GO:0001938~positive regulation of endothelial cell proliferation | 8 | 5.673758865 | 1.48E-06 | BMP2, ARG1, KDR, AKT1, FGF2, TGFBR1, PGF, VEGFA | 141 | 78 | 19453 | 14.15020913 | 0.003831938 | 5.73E-05 | 5.11E-05 |
| GOTERM_BP_DIRECT | GO:2001243~negative regulation of intrinsic apoptotic signaling pathway | 6 | 4.255319149 | 1.55E-06 | HDAC1, SRC, BCL2, AKT1, MMP9, MCL1 | 141 | 28 | 19453 | 29.56382979 | 0.003991125 | 5.88E-05 | 5.24E-05 |
| GOTERM_BP_DIRECT | GO:0045471~response to ethanol | 9 | 6.382978723 | 1.60E-06 | NQO1, CCND1, RPS6KB1, CDK1, TYMS, PPARA, TNF, IL2, IGF1R | 141 | 113 | 19453 | 10.98832612 | 0.004118258 | 5.98E-05 | 5.33E-05 |
| GOTERM_BP_DIRECT | GO:0042981~regulation of apoptotic process | 12 | 8.510638298 | 1.64E-06 | ALK, HSP90AA1, FLT3, STAT1, DAPK1, APEX1, ABL1, AKT1, RAF1, ESR1, CTSB, MCL1 | 141 | 245 | 19453 | 6.757446809 | 0.00423919 | 6.07E-05 | 5.41E-05 |
| GOTERM_BP_DIRECT | GO:1900087~positive regulation of G1/S transition of mitotic cell cycle | 7 | 4.964539007 | 1.72E-06 | CCND3, ADAM17, CCND1, TERT, APEX1, AKT1, EGFR | 141 | 51 | 19453 | 18.93630928 | 0.004444273 | 6.27E-05 | 5.59E-05 |
| GOTERM_BP_DIRECT | GO:0007204~positive regulation of cytosolic calcium ion concentration | 10 | 7.092198582 | 1.85E-06 | EDNRA, CXCR3, CXCR2, ABL1, CXCR4, TRPV1, HTR2A, ESR1, IL2, PIK3CG | 141 | 155 | 19453 | 8.900938 | 0.004766302 | 6.64E-05 | 5.91E-05 |
| GOTERM_BP_DIRECT | GO:0009636~response to toxic substance | 8 | 5.673758865 | 1.92E-06 | NQO1, RPS6KB1, MDM2, BCL2, CDK1, CYP1B1, TYMS, SLC6A4 | 141 | 81 | 19453 | 13.62612731 | 0.004951077 | 6.80E-05 | 6.06E-05 |
| GOTERM_BP_DIRECT | GO:0034614~cellular response to reactive oxygen species | 7 | 4.964539007 | 2.17E-06 | MAPK8, MMP2, MMP3, MAPK1, AKT1, MMP9, EGFR | 141 | 53 | 19453 | 18.22173157 | 0.00559561 | 7.58E-05 | 6.76E-05 |
| GOTERM_BP_DIRECT | GO:0070371~ERK1 and ERK2 cascade | 7 | 4.964539007 | 2.43E-06 | MAP2K1, CDK1, ABL1, KDR, MAPK1, BRAF, FGF2 | 141 | 54 | 19453 | 17.88429209 | 0.00625595 | 8.37E-05 | 7.46E-05 |
| GOTERM_BP_DIRECT | GO:1904707~positive regulation of vascular smooth muscle cell proliferation | 7 | 4.964539007 | 2.71E-06 | TERT, SRC, MMP2, MDM2, TNF, FGF2, MMP9 | 141 | 55 | 19453 | 17.55912315 | 0.006978143 | 9.21E-05 | 8.21E-05 |
| GOTERM_BP_DIRECT | GO:0048146~positive regulation of fibroblast proliferation | 7 | 4.964539007 | 3.01E-06 | CCNA2, CDK6, CDK4, ABL1, MIF, ESR1, EGFR | 141 | 56 | 19453 | 17.24556738 | 0.007766469 | 1.01E-04 | 9.02E-05 |
| GOTERM_BP_DIRECT | GO:0043552~positive regulation of phosphatidylinositol 3-kinase activity | 6 | 4.255319149 | 3.10E-06 | FLT1, FLT3, SRC, KIT, FGF2, PTK2 | 141 | 32 | 19453 | 25.86835106 | 0.007974833 | 1.03E-04 | 9.15E-05 |
| GOTERM_BP_DIRECT | GO:1904645~response to beta-amyloid | 5 | 3.546099291 | 3.30E-06 | MMP13, CHRNA7, MMP2, MMP3, MMP9 | 141 | 15 | 19453 | 45.98817967 | 0.008496397 | 1.08E-04 | 9.62E-05 |
| GOTERM_BP_DIRECT | GO:0006935~chemotaxis | 9 | 6.382978723 | 3.41E-06 | MAP2K1, PLAU, CXCR3, CXCR2, MAPK1, CXCR4, MAPK14, FGF2, TYMP | 141 | 125 | 19453 | 9.933446809 | 0.008784448 | 1.10E-04 | 9.83E-05 |
| GOTERM_BP_DIRECT | GO:0000122~negative regulation of transcription from RNA polymerase II promoter | 23 | 16.31205674 | 3.52E-06 | YAP1, PARP1, STAT1, HDAC1, PLK1, STAT3, TRPV1, NR3C1, ESR1, TNF, ESR2, HDAC6, VEGFA, CCND3, BMP2, CDK6, CCND1, CCNE1, CDK2, MDM2, PPARG, PPARA, HSPA1A | 141 | 1016 | 19453 | 3.123212989 | 0.009067498 | 1.12E-04 | 1.00E-04 |
| GOTERM_BP_DIRECT | GO:0007584~response to nutrient | 7 | 4.964539007 | 5.51E-06 | NQO1, RPS6KB1, STAT1, IGFBP2, CYP1B1, PPARG, SLC6A4 | 141 | 62 | 19453 | 15.5766415 | 0.014147876 | 1.73E-04 | 1.54E-04 |
| GOTERM_BP_DIRECT | GO:0016477~cell migration | 12 | 8.510638298 | 5.54E-06 | FLT1, RPS6KB1, PIK3CA, PDPK1, MMP2, CDK1, KDR, MET, MMP9, PTK2, PIK3CG, FGFR1 | 141 | 278 | 19453 | 5.955303842 | 0.014231302 | 1.73E-04 | 1.54E-04 |
| GOTERM_BP_DIRECT | GO:0043627~response to estrogen | 7 | 4.964539007 | 6.05E-06 | MMP14, HSP90AA1, CCND1, MMP2, IGFBP2, PPARG, ESR1 | 141 | 63 | 19453 | 15.32939322 | 0.015534298 | 1.86E-04 | 1.66E-04 |
| GOTERM_BP_DIRECT | GO:0008285~negative regulation of cell proliferation | 15 | 10.63829787 | 6.36E-06 | MAP2K1, NOS3, IGFBP3, STAT3, SSTR2, PTGS2, SOD2, FGF2, BMP2, CDK6, CYP1B1, NOX4, RAF1, HSPA1A, TP73 | 141 | 462 | 19453 | 4.47936815 | 0.016306432 | 1.93E-04 | 1.72E-04 |
| GOTERM_BP_DIRECT | GO:2001240~negative regulation of extrinsic apoptotic signaling pathway in absence of ligand | 6 | 4.255319149 | 6.51E-06 | TERT, BCL2, AKT1, TNF, HSPA1A, MCL1 | 141 | 37 | 19453 | 22.37262795 | 0.016696795 | 1.96E-04 | 1.74E-04 |
| GOTERM_BP_DIRECT | GO:0071373~cellular response to luteinizing hormone stimulus | 4 | 2.836879433 | 7.18E-06 | CCNA2, EDNRA, CYP1B1, PLAT | 141 | 6 | 19453 | 91.97635934 | 0.018408981 | 2.14E-04 | 1.90E-04 |
| GOTERM_BP_DIRECT | GO:0042752~regulation of circadian rhythm | 7 | 4.964539007 | 7.95E-06 | TOP2A, MAPK10, GSK3B, MAPK8, CDK1, PPARG, PPARA | 141 | 66 | 19453 | 14.63260262 | 0.020358892 | 2.34E-04 | 2.08E-04 |
| GOTERM_BP_DIRECT | GO:2000811~negative regulation of anoikis | 5 | 3.546099291 | 9.16E-06 | PIK3CA, SRC, BCL2, PTK2, MCL1 | 141 | 19 | 19453 | 36.30645763 | 0.023414366 | 2.66E-04 | 2.37E-04 |
| GOTERM_BP_DIRECT | GO:0031100~animal organ regeneration | 6 | 4.255319149 | 9.66E-06 | CCNA2, ACE, FLT3, CDK1, PPARG, PGF | 141 | 40 | 19453 | 20.69468085 | 0.024671293 | 2.78E-04 | 2.47E-04 |
| GOTERM_BP_DIRECT | GO:0032755~positive regulation of interleukin-6 production | 8 | 5.673758865 | 1.09E-05 | SYK, NOS2, ADORA2B, STAT3, TLR9, PTPN11, MMP8, TNF | 141 | 105 | 19453 | 10.51158392 | 0.027756603 | 3.07E-04 | 2.74E-04 |
| GOTERM_BP_DIRECT | GO:0035094~response to nicotine | 6 | 4.255319149 | 1.09E-05 | CHRNA7, CASP3, MMP2, BCL2, MAPK1, IGF1R | 141 | 41 | 19453 | 20.18993254 | 0.027890129 | 3.07E-04 | 2.74E-04 |
| GOTERM_BP_DIRECT | GO:0008286~insulin receptor signaling pathway | 7 | 4.964539007 | 1.12E-05 | GSK3B, PIK3CA, PDPK1, MAPK1, AKT1, RAF1, IGF1R | 141 | 70 | 19453 | 13.7964539 | 0.028574925 | 3.12E-04 | 2.78E-04 |
| GOTERM_BP_DIRECT | GO:0031663~lipopolysaccharide-mediated signaling pathway | 6 | 4.255319149 | 1.23E-05 | HCK, NOS3, MAPK1, AKT1, MAPK14, TNF | 141 | 42 | 19453 | 19.70921986 | 0.031419872 | 3.36E-04 | 2.99E-04 |
| GOTERM_BP_DIRECT | GO:0001541~ovarian follicle development | 6 | 4.255319149 | 1.23E-05 | MMP14, MMP2, KIT, BCL2, KDR, VEGFA | 141 | 42 | 19453 | 19.70921986 | 0.031419872 | 3.36E-04 | 2.99E-04 |
| GOTERM_BP_DIRECT | GO:0038096~Fc-gamma receptor signaling pathway involved in phagocytosis | 5 | 3.546099291 | 1.40E-05 | HCK, SYK, SRC, ABL1, PTK2 | 141 | 21 | 19453 | 32.84869976 | 0.035531078 | 3.77E-04 | 3.36E-04 |
| GOTERM_BP_DIRECT | GO:0008584~male gonad development | 8 | 5.673758865 | 1.66E-05 | MMP14, ACE, KIT, BCL2, TLR9, CYP1B1, ESR1, TGFBR1 | 141 | 112 | 19453 | 9.854609929 | 0.042061105 | 4.43E-04 | 3.95E-04 |
| GOTERM_BP_DIRECT | GO:0030154~cell differentiation | 18 | 12.76595745 | 1.78E-05 | FLT1, SYK, FLT3, SRC, STAT3, FGF1, FGF2, EGFR, PGF, PTK2, TYMP, VEGFA, HCK, AKT1, PPARG, RAF1, PPARA, MCL1 | 141 | 723 | 19453 | 3.434801801 | 0.045100584 | 4.71E-04 | 4.20E-04 |
| GOTERM_BP_DIRECT | GO:0030512~negative regulation of transforming growth factor beta receptor signaling pathway | 8 | 5.673758865 | 1.86E-05 | ADAM17, BMP2, HSPA5, PDPK1, HDAC1, PPARG, PPARA, HSPA1A | 141 | 114 | 19453 | 9.681722036 | 0.047082506 | 4.87E-04 | 4.34E-04 |
| GOTERM_BP_DIRECT | GO:0006809~nitric oxide biosynthetic process | 5 | 3.546099291 | 2.05E-05 | NQO1, NOS2, NOS3, CYP1B1, AKT1 | 141 | 23 | 19453 | 29.99229109 | 0.05155458 | 5.24E-04 | 4.67E-04 |
| GOTERM_BP_DIRECT | GO:0060324~face development | 5 | 3.546099291 | 2.05E-05 | MAP2K1, EDNRA, MAPK1, BRAF, RAF1 | 141 | 23 | 19453 | 29.99229109 | 0.05155458 | 5.24E-04 | 4.67E-04 |
| GOTERM_BP_DIRECT | GO:0051726~regulation of cell cycle | 11 | 7.80141844 | 2.48E-05 | HSPA8, CDK6, CCNE1, CDK4, PLK1, STAT3, MDM2, ABL1, FGF2, TGFBR1, TP73 | 141 | 268 | 19453 | 5.662723616 | 0.062213589 | 6.30E-04 | 5.61E-04 |
| GOTERM_BP_DIRECT | GO:0034097~response to cytokine | 6 | 4.255319149 | 2.66E-05 | SELP, STAT1, BCL2, TYMS, SELE, MCL1 | 141 | 49 | 19453 | 16.89361702 | 0.066420107 | 6.67E-04 | 5.95E-04 |
| GOTERM_BP_DIRECT | GO:0046686~response to cadmium ion | 5 | 3.546099291 | 2.89E-05 | TERT, ARG1, KIT, CDK1, SOD2 | 141 | 25 | 19453 | 27.5929078 | 0.072048335 | 7.12E-04 | 6.35E-04 |
| GOTERM_BP_DIRECT | GO:0051000~positive regulation of nitric-oxide synthase activity | 5 | 3.546099291 | 2.89E-05 | DHFR, TERT, AKT1, ESR1, TNF | 141 | 25 | 19453 | 27.5929078 | 0.072048335 | 7.12E-04 | 6.35E-04 |
| GOTERM_BP_DIRECT | GO:0014823~response to activity | 6 | 4.255319149 | 2.93E-05 | PIK3CA, MMP2, CDK1, CXCR4, SOD2, TNF | 141 | 50 | 19453 | 16.55574468 | 0.073115292 | 7.16E-04 | 6.38E-04 |
| GOTERM_BP_DIRECT | GO:0008630~intrinsic apoptotic signaling pathway in response to DNA damage | 6 | 4.255319149 | 3.24E-05 | BCL2, ABL1, SOD2, TNF, TP73, MCL1 | 141 | 51 | 19453 | 16.23112224 | 0.080288181 | 7.76E-04 | 6.91E-04 |
| GOTERM_BP_DIRECT | GO:0007507~heart development | 10 | 7.092198582 | 3.24E-05 | MAP2K1, CASP7, BMP2, CASP3, MMP2, PTPN11, PPARG, SOD2, PPARA, TGFBR1 | 141 | 221 | 19453 | 6.242739322 | 0.080373158 | 7.76E-04 | 6.91E-04 |
| GOTERM_BP_DIRECT | GO:1905564~positive regulation of vascular endothelial cell proliferation | 5 | 3.546099291 | 4.60E-05 | ADAM17, PDPK1, STAT3, FGF2, FGFR1 | 141 | 28 | 19453 | 24.63652482 | 0.112209897 | 0.001091901 | 9.73E-04 |
| GOTERM_BP_DIRECT | GO:0031334~positive regulation of protein complex assembly | 6 | 4.255319149 | 4.68E-05 | GSK3B, SYK, MMP1, MMP3, TNF, VEGFA | 141 | 55 | 19453 | 15.05067698 | 0.114072323 | 0.001101065 | 9.81E-04 |
| GOTERM_BP_DIRECT | GO:0043154~negative regulation of cysteine-type endopeptidase activity involved in apoptotic process | 6 | 4.255319149 | 5.11E-05 | SRC, AKT1, RAF1, PTGS2, TNF, VEGFA | 141 | 56 | 19453 | 14.78191489 | 0.12386084 | 0.001191234 | 0.001061382 |
| GOTERM_BP_DIRECT | GO:0071456~cellular response to hypoxia | 8 | 5.673758865 | 5.28E-05 | CCNA2, TERT, SRC, MDM2, BCL2, PPARG, PTGS2, VEGFA | 141 | 134 | 19453 | 8.236688896 | 0.12762919 | 0.001214967 | 0.001082527 |
| GOTERM_BP_DIRECT | GO:0071549~cellular response to dexamethasone stimulus | 5 | 3.546099291 | 5.31E-05 | RPS6KB1, ARG1, PLAT, NR3C1, IGF1R | 141 | 29 | 19453 | 23.78698948 | 0.128286871 | 0.001214967 | 0.001082527 |
| GOTERM_BP_DIRECT | GO:0019722~calcium-mediated signaling | 7 | 4.964539007 | 5.35E-05 | SYK, PDPK1, CXCR3, CXCR2, CXCR4, SELE, TNF | 141 | 92 | 19453 | 10.49730188 | 0.129353979 | 0.001215053 | 0.001082605 |
| GOTERM_BP_DIRECT | GO:0031647~regulation of protein stability | 7 | 4.964539007 | 5.69E-05 | HSPA8, TERT, CASP3, BCL2, MAPK1, HDAC6, AURKA | 141 | 93 | 19453 | 10.38442767 | 0.136883021 | 0.001265158 | 0.001127248 |
| GOTERM_BP_DIRECT | GO:0050847~progesterone receptor signaling pathway | 4 | 2.836879433 | 5.77E-05 | YAP1, SRC, MAPK1, PGR | 141 | 11 | 19453 | 50.16892328 | 0.138683282 | 0.001265158 | 0.001127248 |
| GOTERM_BP_DIRECT | GO:0071492~cellular response to UV-A | 4 | 2.836879433 | 5.77E-05 | MMP1, MMP2, MMP3, MMP9 | 141 | 11 | 19453 | 50.16892328 | 0.138683282 | 0.001265158 | 0.001127248 |
| GOTERM_BP_DIRECT | GO:0060020~Bergmann glial cell differentiation | 4 | 2.836879433 | 5.77E-05 | MAP2K1, ABL1, MAPK1, PTPN11 | 141 | 11 | 19453 | 50.16892328 | 0.138683282 | 0.001265158 | 0.001127248 |
| GOTERM_BP_DIRECT | GO:0006974~cellular response to DNA damage stimulus | 11 | 7.80141844 | 6.08E-05 | TOP2A, YAP1, CCND1, PARP1, CASP3, CHEK1, BCL2, ABL1, MAPK1, TP73, MCL1 | 141 | 298 | 19453 | 5.092650769 | 0.145609074 | 0.001322367 | 0.00117822 |
| GOTERM_BP_DIRECT | GO:0050731~positive regulation of peptidyl-tyrosine phosphorylation | 7 | 4.964539007 | 6.80E-05 | SYK, SRC, ABL1, PTPN11, MIF, HTR2A, VEGFA | 141 | 96 | 19453 | 10.0599143 | 0.161300728 | 0.001462296 | 0.001302896 |
| GOTERM_BP_DIRECT | GO:0060045~positive regulation of cardiac muscle cell proliferation | 5 | 3.546099291 | 6.95E-05 | YAP1, CDK1, PIM1, MAPK14, FGF2 | 141 | 31 | 19453 | 22.252345 | 0.164620089 | 0.001462296 | 0.001302896 |
| GOTERM_BP_DIRECT | GO:0035987~endodermal cell differentiation | 5 | 3.546099291 | 6.95E-05 | MMP14, MAP2K1, MMP2, MMP8, MMP9 | 141 | 31 | 19453 | 22.252345 | 0.164620089 | 0.001462296 | 0.001302896 |
| GOTERM_BP_DIRECT | GO:0030878~thyroid gland development | 5 | 3.546099291 | 6.95E-05 | MAP2K1, EDNRA, MAPK1, BRAF, RAF1 | 141 | 31 | 19453 | 22.252345 | 0.164620089 | 0.001462296 | 0.001302896 |
| GOTERM_BP_DIRECT | GO:0030155~regulation of cell adhesion | 6 | 4.255319149 | 7.14E-05 | RET, PLAU, CXCR3, ABL1, CXCR4, PTK2 | 141 | 60 | 19453 | 13.7964539 | 0.168691947 | 0.001477986 | 0.001316876 |
| GOTERM_BP_DIRECT | GO:0051384~response to glucocorticoid | 6 | 4.255319149 | 7.14E-05 | CASP3, IGFBP2, BCL2, TYMS, PTGS2, TNF | 141 | 60 | 19453 | 13.7964539 | 0.168691947 | 0.001477986 | 0.001316876 |
| GOTERM_BP_DIRECT | GO:0042060~wound healing | 7 | 4.964539007 | 7.63E-05 | YAP1, CASP3, RAF1, FGF1, PPARA, FGF2, TGFBR1 | 141 | 98 | 19453 | 9.854609929 | 0.179134703 | 0.001566577 | 0.00139581 |
| GOTERM_BP_DIRECT | GO:0043525~positive regulation of neuron apoptotic process | 6 | 4.255319149 | 8.36E-05 | NQO1, CASP3, ABL1, HTR2A, NR3C1, TNF | 141 | 62 | 19453 | 13.351407 | 0.194585672 | 0.001703853 | 0.001518122 |
| GOTERM_BP_DIRECT | GO:0051603~proteolysis involved in cellular protein catabolic process | 5 | 3.546099291 | 8.94E-05 | HSPA5, CTSL, MDM2, CTSS, CTSB | 141 | 33 | 19453 | 20.90371803 | 0.206517984 | 0.001807141 | 0.001610151 |
| GOTERM_BP_DIRECT | GO:0007249~I-kappaB kinase/NF-kappaB signaling | 6 | 4.255319149 | 9.74E-05 | IKBKB, EDNRA, ABL1, TLR9, AKT1, TNF | 141 | 64 | 19453 | 12.93417553 | 0.222798311 | 0.001931094 | 0.001720592 |
| GOTERM_BP_DIRECT | GO:0033628~regulation of cell adhesion mediated by integrin | 4 | 2.836879433 | 9.90E-05 | PLAU, PTPN11, PTK2, PIK3CG | 141 | 13 | 19453 | 42.45062739 | 0.22590464 | 0.001931094 | 0.001720592 |
| GOTERM_BP_DIRECT | GO:0030518~intracellular steroid hormone receptor signaling pathway | 4 | 2.836879433 | 9.90E-05 | PGR, NR3C1, ESR1, ESR2 | 141 | 13 | 19453 | 42.45062739 | 0.22590464 | 0.001931094 | 0.001720592 |
| GOTERM_BP_DIRECT | GO:0046718~viral entry into host cell | 7 | 4.964539007 | 1.01E-04 | CTSL, CDK1, CXCR4, HTR2A, EGFR, CTSB, HSPA1A | 141 | 103 | 19453 | 9.376230806 | 0.229239117 | 0.001931094 | 0.001720592 |
| GOTERM_BP_DIRECT | GO:0045931~positive regulation of mitotic cell cycle | 5 | 3.546099291 | 1.01E-04 | RPS6KB1, MDM2, ABL1, PTPN11, AURKA | 141 | 34 | 19453 | 20.2889028 | 0.229496351 | 0.001931094 | 0.001720592 |
| GOTERM_BP_DIRECT | GO:0010033~response to organic substance | 5 | 3.546099291 | 1.01E-04 | CDK6, CDK4, ANXA5, CDK2, MMP9 | 141 | 34 | 19453 | 20.2889028 | 0.229496351 | 0.001931094 | 0.001720592 |
| GOTERM_BP_DIRECT | GO:0035924~cellular response to vascular endothelial growth factor stimulus | 5 | 3.546099291 | 1.01E-04 | FLT1, KDR, AKT1, MAPK14, VEGFA | 141 | 34 | 19453 | 20.2889028 | 0.229496351 | 0.001931094 | 0.001720592 |
| GOTERM_BP_DIRECT | GO:0051301~cell division | 12 | 8.510638298 | 1.05E-04 | CCNA2, CCND3, CDK6, CCND1, CCNE1, CDK4, CDK2, CDK1, NEK1, NR3C1, CDC25A, AURKA | 141 | 383 | 19453 | 4.322648742 | 0.237496037 | 0.0019816 | 0.001765593 |
| GOTERM_BP_DIRECT | GO:0032757~positive regulation of interleukin-8 production | 6 | 4.255319149 | 1.05E-04 | SYK, NOS2, STAT3, TLR9, TNF, HSPA1A | 141 | 65 | 19453 | 12.73518822 | 0.237759751 | 0.0019816 | 0.001765593 |
| GOTERM_BP_DIRECT | GO:0090050~positive regulation of cell migration involved in sprouting angiogenesis | 5 | 3.546099291 | 1.13E-04 | ABL1, KDR, PTGS2, FGF2, VEGFA | 141 | 35 | 19453 | 19.70921986 | 0.253765872 | 0.00212101 | 0.001889806 |
| GOTERM_BP_DIRECT | GO:0048011~neurotrophin TRK receptor signaling pathway | 4 | 2.836879433 | 1.25E-04 | SRC, CASP3, PTPN11, RAF1 | 141 | 14 | 19453 | 39.41843972 | 0.276882011 | 0.002306027 | 0.002054655 |
| GOTERM_BP_DIRECT | GO:0010389~regulation of G2/M transition of mitotic cell cycle | 4 | 2.836879433 | 1.25E-04 | CDK6, CDK4, CDK2, AURKA | 141 | 14 | 19453 | 39.41843972 | 0.276882011 | 0.002306027 | 0.002054655 |
| GOTERM_BP_DIRECT | GO:0043542~endothelial cell migration | 5 | 3.546099291 | 1.27E-04 | PIK3CA, NOS3, ABL1, CYP1B1, TGFBR1 | 141 | 36 | 19453 | 19.16174153 | 0.279259861 | 0.002306027 | 0.002054655 |
| GOTERM_BP_DIRECT | GO:0071276~cellular response to cadmium ion | 5 | 3.546099291 | 1.27E-04 | MAPK8, MAPK1, AKT1, MMP9, EGFR | 141 | 36 | 19453 | 19.16174153 | 0.279259861 | 0.002306027 | 0.002054655 |
| GOTERM_BP_DIRECT | GO:0007166~cell surface receptor signaling pathway | 11 | 7.80141844 | 1.38E-04 | CXCR3, CXCR2, BAG1, MAPK1, TRPV1, MIF, F2, MAPK14, TNF, MET, EGFR | 141 | 329 | 19453 | 4.612796137 | 0.299423483 | 0.002488302 | 0.002217061 |
| GOTERM_BP_DIRECT | GO:2001237~negative regulation of extrinsic apoptotic signaling pathway | 5 | 3.546099291 | 1.41E-04 | YAP1, RPS6KB1, SRC, GSTP1, TGFBR1 | 141 | 37 | 19453 | 18.64385662 | 0.305895223 | 0.002517976 | 0.0022435 |
| GOTERM_BP_DIRECT | GO:2000352~negative regulation of endothelial cell apoptotic process | 5 | 3.546099291 | 1.41E-04 | TERT, PDPK1, ABL1, KDR, BRAF | 141 | 37 | 19453 | 18.64385662 | 0.305895223 | 0.002517976 | 0.0022435 |
| GOTERM_BP_DIRECT | GO:0000165~MAPK cascade | 8 | 5.673758865 | 1.43E-04 | RET, MAP2K1, IGFBP3, BRAF, RAF1, TNF, EGFR, FGFR1 | 141 | 157 | 19453 | 7.030040204 | 0.308886993 | 0.002530312 | 0.002254491 |
| GOTERM_BP_DIRECT | GO:0070141~response to UV-A | 3 | 2.127659574 | 1.54E-04 | CCND1, AKT1, EGFR | 141 | 3 | 19453 | 137.964539 | 0.327846393 | 0.002687367 | 0.002394426 |
| GOTERM_BP_DIRECT | GO:0097067~cellular response to thyroid hormone stimulus | 4 | 2.836879433 | 1.56E-04 | CTSL, KIT, CTSS, CTSB | 141 | 15 | 19453 | 36.79054374 | 0.33175569 | 0.002687367 | 0.002394426 |
| GOTERM_BP_DIRECT | GO:1990090~cellular response to nerve growth factor stimulus | 5 | 3.546099291 | 1.57E-04 | HSPA5, PARP1, AKT1, BRAF, TRPV1 | 141 | 38 | 19453 | 18.15322882 | 0.333572706 | 0.002687367 | 0.002394426 |
| GOTERM_BP_DIRECT | GO:0031333~negative regulation of protein complex assembly | 5 | 3.546099291 | 1.57E-04 | GSK3B, HSPA5, SRC, RAF1, HDAC6 | 141 | 38 | 19453 | 18.15322882 | 0.333572706 | 0.002687367 | 0.002394426 |
| GOTERM_BP_DIRECT | GO:0014065~phosphatidylinositol 3-kinase signaling | 5 | 3.546099291 | 1.57E-04 | PIK3CA, AKT1, HTR2A, PIK3CG, IGF1R | 141 | 38 | 19453 | 18.15322882 | 0.333572706 | 0.002687367 | 0.002394426 |
| GOTERM_BP_DIRECT | GO:0007623~circadian rhythm | 6 | 4.255319149 | 1.60E-04 | GSK3B, NOS2, TOP1, TYMS, TNF, SLC6A4 | 141 | 71 | 19453 | 11.65897513 | 0.338627525 | 0.00271977 | 0.002423297 |
| GOTERM_BP_DIRECT | GO:0071300~cellular response to retinoic acid | 6 | 4.255319149 | 1.71E-04 | RET, YAP1, GSK3B, PPARG, TNF, SLC6A4 | 141 | 72 | 19453 | 11.49704492 | 0.357087115 | 0.002886983 | 0.002572282 |
| GOTERM_BP_DIRECT | GO:0051146~striated muscle cell differentiation | 4 | 2.836879433 | 1.91E-04 | CASP7, CASP3, AKT1, MAPK14 | 141 | 16 | 19453 | 34.49113475 | 0.389527776 | 0.003204386 | 0.002855087 |
| GOTERM_BP_DIRECT | GO:0032091~negative regulation of protein binding | 6 | 4.255319149 | 2.07E-04 | GSK3B, MAPK8, ACE, AKT1, PPARA, AURKA | 141 | 75 | 19453 | 11.03716312 | 0.414687925 | 0.003455191 | 0.003078553 |
| GOTERM_BP_DIRECT | GO:0051091~positive regulation of sequence-specific DNA binding transcription factor activity | 7 | 4.964539007 | 2.12E-04 | BMP2, KIT, AKT1, PPARG, ESR1, TNF, ESR2 | 141 | 118 | 19453 | 8.18433706 | 0.422768504 | 0.003522138 | 0.003138202 |
| GOTERM_BP_DIRECT | GO:0031295~T cell costimulation | 5 | 3.546099291 | 2.55E-04 | PIK3CA, PDPK1, SRC, AKT1, PTPN11 | 141 | 43 | 19453 | 16.04238826 | 0.483090818 | 0.004202573 | 0.003744465 |
| GOTERM_BP_DIRECT | GO:0042593~glucose homeostasis | 7 | 4.964539007 | 2.66E-04 | FABP5, ALOX5, STAT3, AKT1, PTPN11, PPARG, IGF1R | 141 | 123 | 19453 | 7.851640431 | 0.49751593 | 0.004355062 | 0.003880332 |
| GOTERM_BP_DIRECT | GO:0045454~cell redox homeostasis | 5 | 3.546099291 | 2.79E-04 | NQO1, NOS2, NOS3, APEX1, GSR | 141 | 44 | 19453 | 15.67778852 | 0.514150437 | 0.004539343 | 0.004044525 |
| GOTERM_BP_DIRECT | GO:0048511~rhythmic process | 6 | 4.255319149 | 2.97E-04 | TOP2A, MAPK10, GSK3B, MAPK8, CDK1, PPARG | 141 | 81 | 19453 | 10.21959548 | 0.536153606 | 0.004800549 | 0.004277257 |
| GOTERM_BP_DIRECT | GO:0042542~response to hydrogen peroxide | 5 | 3.546099291 | 3.05E-04 | STAT1, CASP3, MMP2, BCL2, SOD2 | 141 | 45 | 19453 | 15.32939322 | 0.545198541 | 0.004880988 | 0.004348929 |
| GOTERM_BP_DIRECT | GO:0060978~angiogenesis involved in coronary vascular morphogenesis | 3 | 2.127659574 | 3.06E-04 | ACE, FGF2, TGFBR1 | 141 | 4 | 19453 | 103.4734043 | 0.546536719 | 0.004880988 | 0.004348929 |
| GOTERM_BP_DIRECT | GO:0008283~cell proliferation | 8 | 5.673758865 | 3.09E-04 | YAP1, EDNRA, SRC, STAT3, ODC1, CDK1, AKT1, CDC25A | 141 | 178 | 19453 | 6.200653439 | 0.549903029 | 0.004896743 | 0.004362966 |
| GOTERM_BP_DIRECT | GO:0051403~stress-activated MAPK cascade | 4 | 2.836879433 | 3.25E-04 | IKBKB, MAPK8, MAPK1, MAPK14 | 141 | 19 | 19453 | 29.04516611 | 0.568558432 | 0.00509146 | 0.004536458 |
| GOTERM_BP_DIRECT | GO:1904646~cellular response to beta-amyloid | 5 | 3.546099291 | 3.32E-04 | GSK3B, ABCC1, PARP1, TNF, IGF1R | 141 | 46 | 19453 | 14.99614554 | 0.576056641 | 0.00509146 | 0.004536458 |
| GOTERM_BP_DIRECT | GO:0045747~positive regulation of Notch signaling pathway | 5 | 3.546099291 | 3.32E-04 | YAP1, SRC, NOS3, STAT3, KIT | 141 | 46 | 19453 | 14.99614554 | 0.576056641 | 0.00509146 | 0.004536458 |
| GOTERM_BP_DIRECT | GO:0008217~regulation of blood pressure | 6 | 4.255319149 | 3.33E-04 | EDNRA, ACE, NOS3, PPARG, SOD2, PTGS2 | 141 | 83 | 19453 | 9.973340169 | 0.577091706 | 0.00509146 | 0.004536458 |
| GOTERM_BP_DIRECT | GO:0030324~lung development | 6 | 4.255319149 | 3.33E-04 | MMP14, NOS3, ARG1, FGF1, FGF2, VEGFA | 141 | 83 | 19453 | 9.973340169 | 0.577091706 | 0.00509146 | 0.004536458 |
| GOTERM_BP_DIRECT | GO:0032436~positive regulation of proteasomal ubiquitin-dependent protein catabolic process | 6 | 4.255319149 | 3.33E-04 | GSK3B, PLK1, MDM2, AKT1, AURKA, HSPA1A | 141 | 83 | 19453 | 9.973340169 | 0.577091706 | 0.00509146 | 0.004536458 |
| GOTERM_BP_DIRECT | GO:0048870~cell motility | 5 | 3.546099291 | 3.61E-04 | MMP14, ADAM17, MAP2K1, PTK2, TGFBR1 | 141 | 47 | 19453 | 14.67707862 | 0.606547068 | 0.005422242 | 0.004831182 |
| GOTERM_BP_DIRECT | GO:0048015~phosphatidylinositol-mediated signaling | 5 | 3.546099291 | 3.61E-04 | RPS6KB1, PIK3CA, PIK3CG, FGFR1, IGF1R | 141 | 47 | 19453 | 14.67707862 | 0.606547068 | 0.005422242 | 0.004831182 |
| GOTERM_BP_DIRECT | GO:0050673~epithelial cell proliferation | 5 | 3.546099291 | 3.61E-04 | YAP1, KIT, KDR, FGF1, EGFR | 141 | 47 | 19453 | 14.67707862 | 0.606547068 | 0.005422242 | 0.004831182 |
| GOTERM_BP_DIRECT | GO:0071548~response to dexamethasone | 4 | 2.836879433 | 3.80E-04 | ACE, PIK3CA, CYP1B1, HDAC6 | 141 | 20 | 19453 | 27.5929078 | 0.6261115 | 0.00568561 | 0.005065842 |
| GOTERM_BP_DIRECT | GO:0071407~cellular response to organic cyclic compound | 5 | 3.546099291 | 3.91E-04 | BMP2, STAT1, CDK1, CYP1B1, TNF | 141 | 48 | 19453 | 14.37130615 | 0.636495949 | 0.005814753 | 0.005180906 |
| GOTERM_BP_DIRECT | GO:0030198~extracellular matrix organization | 8 | 5.673758865 | 4.57E-04 | MMP14, MMP13, MMP1, MMP2, MMP3, MMP8, TNF, MMP9 | 141 | 190 | 19453 | 5.809033221 | 0.693581579 | 0.006690731 | 0.005961397 |
| GOTERM_BP_DIRECT | GO:0048013~ephrin receptor signaling pathway | 5 | 3.546099291 | 4.58E-04 | SRC, MMP2, PTPN11, MMP9, PTK2 | 141 | 50 | 19453 | 13.7964539 | 0.694110249 | 0.006690731 | 0.005961397 |
| GOTERM_BP_DIRECT | GO:0050918~positive chemotaxis | 5 | 3.546099291 | 4.58E-04 | MIF, FGF2, MET, PGF, VEGFA | 141 | 50 | 19453 | 13.7964539 | 0.694110249 | 0.006690731 | 0.005961397 |
| GOTERM_BP_DIRECT | GO:0002042~cell migration involved in sprouting angiogenesis | 4 | 2.836879433 | 5.08E-04 | KDR, AKT1, FGF2, VEGFA | 141 | 22 | 19453 | 25.08446164 | 0.731565165 | 0.007386589 | 0.006581402 |
| GOTERM_BP_DIRECT | GO:0031648~protein destabilization | 5 | 3.546099291 | 5.32E-04 | BMP2, SRC, PLK1, MDM2, HDAC6 | 141 | 52 | 19453 | 13.26582106 | 0.747694014 | 0.007606333 | 0.006777193 |
| GOTERM_BP_DIRECT | GO:0034605~cellular response to heat | 5 | 3.546099291 | 5.32E-04 | HSP90AA1, TRPV1, FGF1, PTGS2, HSPA1A | 141 | 52 | 19453 | 13.26582106 | 0.747694014 | 0.007606333 | 0.006777193 |
| GOTERM_BP_DIRECT | GO:1904263~positive regulation of TORC1 signaling | 5 | 3.546099291 | 5.32E-04 | SYK, RPS6KB1, SRC, PIM1, AKT1 | 141 | 52 | 19453 | 13.26582106 | 0.747694014 | 0.007606333 | 0.006777193 |
| GOTERM_BP_DIRECT | GO:0014911~positive regulation of smooth muscle cell migration | 4 | 2.836879433 | 5.81E-04 | RPS6KB1, SRC, BCL2, CYP1B1 | 141 | 23 | 19453 | 23.99383287 | 0.777878918 | 0.0082191 | 0.007323164 |
| GOTERM_BP_DIRECT | GO:0045861~negative regulation of proteolysis | 4 | 2.836879433 | 5.81E-04 | AKT1, PLAT, F2, HDAC6 | 141 | 23 | 19453 | 23.99383287 | 0.777878918 | 0.0082191 | 0.007323164 |
| GOTERM_BP_DIRECT | GO:0000079~regulation of cyclin-dependent protein serine/threonine kinase activity | 5 | 3.546099291 | 6.15E-04 | CCNA2, CCND3, CCND1, CCNE1, CDC25A | 141 | 54 | 19453 | 12.77449435 | 0.796274824 | 0.00864399 | 0.007701739 |
| GOTERM_BP_DIRECT | GO:0035019~somatic stem cell population maintenance | 5 | 3.546099291 | 6.59E-04 | YAP1, STAT3, KIT, BRAF, RAF1 | 141 | 55 | 19453 | 12.54223082 | 0.818464146 | 0.009144079 | 0.008147314 |
| GOTERM_BP_DIRECT | GO:0051090~regulation of sequence-specific DNA binding transcription factor activity | 4 | 2.836879433 | 6.61E-04 | MAPK10, HCK, MAPK8, SYK | 141 | 24 | 19453 | 22.99408983 | 0.819226082 | 0.009144079 | 0.008147314 |
| GOTERM_BP_DIRECT | GO:0043303~mast cell degranulation | 4 | 2.836879433 | 6.61E-04 | SYK, ADORA2B, KIT, PIK3CG | 141 | 24 | 19453 | 22.99408983 | 0.819226082 | 0.009144079 | 0.008147314 |
| GOTERM_BP_DIRECT | GO:0045087~innate immune response | 14 | 9.929078014 | 6.73E-04 | NQO1, SYK, PARP1, DAPK1, SRC, ARG1, MMP3, MIF, PIK3CG, PTK2, IKBKB, HCK, TLR9, PPARG | 141 | 634 | 19453 | 3.046535562 | 0.824727429 | 0.009259718 | 0.008250348 |
| GOTERM_BP_DIRECT | GO:0043124~negative regulation of I-kappaB kinase/NF-kappaB signaling | 5 | 3.546099291 | 7.06E-04 | STAT1, HDAC1, GSTP1, ABL1, ESR1 | 141 | 56 | 19453 | 12.31826241 | 0.839172711 | 0.009665497 | 0.008611894 |
| GOTERM_BP_DIRECT | GO:0007569~cell aging | 4 | 2.836879433 | 7.47E-04 | BCL2, CDK1, NOX4, MIF | 141 | 25 | 19453 | 22.07432624 | 0.855379568 | 0.010120001 | 0.009016854 |
| GOTERM_BP_DIRECT | GO:0044772~mitotic cell cycle phase transition | 4 | 2.836879433 | 7.47E-04 | CCNA2, CCND3, CCND1, CCNE1 | 141 | 25 | 19453 | 22.07432624 | 0.855379568 | 0.010120001 | 0.009016854 |
| GOTERM_BP_DIRECT | GO:0031284~positive regulation of guanylate cyclase activity | 3 | 2.127659574 | 7.57E-04 | NOS2, ADORA2B, NOS3 | 141 | 6 | 19453 | 68.9822695 | 0.858988239 | 0.010198805 | 0.009087068 |
| GOTERM_BP_DIRECT | GO:0042026~protein refolding | 4 | 2.836879433 | 8.40E-04 | HSPA8, HSP90AA1, HSPA5, HSPA1A | 141 | 26 | 19453 | 21.22531369 | 0.88633407 | 0.011262062 | 0.010034423 |
| GOTERM_BP_DIRECT | GO:0000723~telomere maintenance | 5 | 3.546099291 | 9.17E-04 | TERT, PARP1, CCNE1, APEX1, POT1 | 141 | 60 | 19453 | 11.49704492 | 0.906815963 | 0.012227271 | 0.010894419 |
| GOTERM_BP_DIRECT | GO:1903672~positive regulation of sprouting angiogenesis | 4 | 2.836879433 | 0.00104757 | PDPK1, FGF1, FGF2, VEGFA | 141 | 28 | 19453 | 19.70921986 | 0.9335619 | 0.013642505 | 0.012155382 |
| GOTERM_BP_DIRECT | GO:2000773~negative regulation of cellular senescence | 4 | 2.836879433 | 0.00104757 | CDK6, TERT, ABL1, MIF | 141 | 28 | 19453 | 19.70921986 | 0.9335619 | 0.013642505 | 0.012155382 |
| GOTERM_BP_DIRECT | GO:0060391~positive regulation of SMAD protein import into nucleus | 4 | 2.836879433 | 0.00104757 | BMP2, PARP1, PPARG, TGFBR1 | 141 | 28 | 19453 | 19.70921986 | 0.9335619 | 0.013642505 | 0.012155382 |
| GOTERM_BP_DIRECT | GO:0071393~cellular response to progesterone stimulus | 3 | 2.127659574 | 0.001054697 | SRC, CYP1B1, IGF1R | 141 | 7 | 19453 | 59.12765957 | 0.934776856 | 0.013642505 | 0.012155382 |
| GOTERM_BP_DIRECT | GO:0002318~myeloid progenitor cell differentiation | 3 | 2.127659574 | 0.001054697 | FLT3, KIT, BRAF | 141 | 7 | 19453 | 59.12765957 | 0.934776856 | 0.013642505 | 0.012155382 |
| GOTERM_BP_DIRECT | GO:0006527~arginine catabolic process | 3 | 2.127659574 | 0.001054697 | NOS2, NOS3, ARG1 | 141 | 7 | 19453 | 59.12765957 | 0.934776856 | 0.013642505 | 0.012155382 |
| GOTERM_BP_DIRECT | GO:0019221~cytokine-mediated signaling pathway | 7 | 4.964539007 | 0.001064289 | HCK, FLT3, STAT1, STAT3, KIT, AKT1, PTPN11 | 141 | 160 | 19453 | 6.035948582 | 0.93637709 | 0.013698087 | 0.012204905 |
| GOTERM_BP_DIRECT | GO:0010507~negative regulation of autophagy | 5 | 3.546099291 | 0.001101583 | STAT3, BCL2, AKT1, MET, MCL1 | 141 | 63 | 19453 | 10.94956659 | 0.942234594 | 0.014100725 | 0.012563654 |
| GOTERM_BP_DIRECT | GO:0032760~positive regulation of tumor necrosis factor production | 6 | 4.255319149 | 0.001106474 | SYK, STAT3, TLR9, PTPN11, MIF, MMP8 | 141 | 108 | 19453 | 7.664696612 | 0.942961684 | 0.014100725 | 0.012563654 |
| GOTERM_BP_DIRECT | GO:0010971~positive regulation of G2/M transition of mitotic cell cycle | 4 | 2.836879433 | 0.00116232 | CCND1, CDK4, CDK1, CDC25A | 141 | 29 | 19453 | 19.02959159 | 0.950642787 | 0.014667915 | 0.013069016 |
| GOTERM_BP_DIRECT | GO:0048714~positive regulation of oligodendrocyte differentiation | 4 | 2.836879433 | 0.00116232 | HDAC1, CXCR4, PPARG, TP73 | 141 | 29 | 19453 | 19.02959159 | 0.950642787 | 0.014667915 | 0.013069016 |
| GOTERM_BP_DIRECT | GO:0043524~negative regulation of neuron apoptotic process | 7 | 4.964539007 | 0.00117416 | CCND1, TERT, PIK3CA, BCL2, KDR, BRAF, SOD2 | 141 | 163 | 19453 | 5.924857503 | 0.952133369 | 0.014745398 | 0.013138053 |
| GOTERM_BP_DIRECT | GO:0009615~response to virus | 6 | 4.255319149 | 0.001201071 | IKBKB, CDK6, SRC, ODC1, CXCR4, TNF | 141 | 110 | 19453 | 7.525338491 | 0.955356165 | 0.015010491 | 0.013374249 |
| GOTERM_BP_DIRECT | GO:0006006~glucose metabolic process | 5 | 3.546099291 | 0.00123827 | PIK3CA, FABP5, AKT1, MAPK14, TNF | 141 | 65 | 19453 | 10.61265685 | 0.95945687 | 0.015400981 | 0.013722172 |
| GOTERM_BP_DIRECT | GO:0007229~integrin-mediated signaling pathway | 6 | 4.255319149 | 0.001250553 | HCK, SYK, SRC, ABL1, PTPN11, PTK2 | 141 | 111 | 19453 | 7.457542649 | 0.960726489 | 0.015479332 | 0.013791983 |
| GOTERM_BP_DIRECT | GO:0007202~activation of phospholipase C activity | 4 | 2.836879433 | 0.001284701 | EDNRA, HTR2A, SELE, EGFR | 141 | 30 | 19453 | 18.39527187 | 0.964051152 | 0.015826293 | 0.014101123 |
| GOTERM_BP_DIRECT | GO:0007049~cell cycle | 10 | 7.092198582 | 0.001350903 | SRC, PLK1, MDM2, PIM1, MAPK1, NEK1, NR3C1, CDC25A, AURKA, TP73 | 141 | 366 | 19453 | 3.769522924 | 0.969716415 | 0.01656297 | 0.014757498 |
| GOTERM_BP_DIRECT | GO:2000272~negative regulation of receptor activity | 3 | 2.127659574 | 0.00139963 | PPARG, PPARA, TNF | 141 | 8 | 19453 | 51.73670213 | 0.973307654 | 0.016999259 | 0.015146228 |
| GOTERM_BP_DIRECT | GO:2000641~regulation of early endosome to late endosome transport | 3 | 2.127659574 | 0.00139963 | MAP2K1, SRC, MAPK1 | 141 | 8 | 19453 | 51.73670213 | 0.973307654 | 0.016999259 | 0.015146228 |
| GOTERM_BP_DIRECT | GO:0051281~positive regulation of release of sequestered calcium ion into cytosol | 4 | 2.836879433 | 0.001414898 | PDPK1, CXCR3, ABL1, F2 | 141 | 31 | 19453 | 17.801876 | 0.974342879 | 0.017104403 | 0.01523991 |
| GOTERM_BP_DIRECT | GO:0007611~learning or memory | 5 | 3.546099291 | 0.001464919 | SRC, CHRNA7, CASP3, MAPK1, EGFR | 141 | 68 | 19453 | 10.1444514 | 0.977461336 | 0.017626719 | 0.01570529 |
| GOTERM_BP_DIRECT | GO:0030168~platelet activation | 5 | 3.546099291 | 0.001546481 | SYK, PIK3CA, SRC, F2, MAPK14 | 141 | 69 | 19453 | 9.997430363 | 0.981754606 | 0.018430514 | 0.016421467 |
| GOTERM_BP_DIRECT | GO:0051602~response to electrical stimulus | 4 | 2.836879433 | 0.001553093 | NQO1, SRC, MMP2, SOD2 | 141 | 32 | 19453 | 17.24556738 | 0.982064537 | 0.018430514 | 0.016421467 |
| GOTERM_BP_DIRECT | GO:0045907~positive regulation of vasoconstriction | 4 | 2.836879433 | 0.001553093 | ACE, ABL1, HTR2A, PTGS2 | 141 | 32 | 19453 | 17.24556738 | 0.982064537 | 0.018430514 | 0.016421467 |
| GOTERM_BP_DIRECT | GO:0071560~cellular response to transforming growth factor beta stimulus | 5 | 3.546099291 | 0.001631152 | ARG1, ABL1, NR3C1, TGFBR1, IGF1R | 141 | 70 | 19453 | 9.854609929 | 0.985348841 | 0.01926845 | 0.017168062 |
| GOTERM_BP_DIRECT | GO:0030182~neuron differentiation | 7 | 4.964539007 | 0.001696935 | MAP2K1, CCND1, HSPA5, HDAC1, CASP3, ABL1, MET | 141 | 175 | 19453 | 5.51858156 | 0.987645075 | 0.019893692 | 0.017725149 |
| GOTERM_BP_DIRECT | GO:0048662~negative regulation of smooth muscle cell proliferation | 4 | 2.836879433 | 0.001699461 | BMP2, NOS3, IGFBP3, PPARG | 141 | 33 | 19453 | 16.72297443 | 0.987725679 | 0.019893692 | 0.017725149 |
| GOTERM_BP_DIRECT | GO:0001542~ovulation from ovarian follicle | 3 | 2.127659574 | 0.001791041 | NOS3, MMP2, PGR | 141 | 9 | 19453 | 45.98817967 | 0.990318876 | 0.020871275 | 0.018596169 |
| GOTERM_BP_DIRECT | GO:0050679~positive regulation of epithelial cell proliferation | 5 | 3.546099291 | 0.001810068 | YAP1, FGF1, FGF2, EGFR, VEGFA | 141 | 72 | 19453 | 9.580870764 | 0.990784681 | 0.020998408 | 0.018709444 |
| GOTERM_BP_DIRECT | GO:0002862~negative regulation of inflammatory response to antigenic stimulus | 4 | 2.836879433 | 0.001854173 | HCK, SYK, SRC, MAPK14 | 141 | 34 | 19453 | 16.23112224 | 0.991780105 | 0.021224537 | 0.018910923 |
| GOTERM_BP_DIRECT | GO:0051085~chaperone mediated protein folding requiring cofactor | 4 | 2.836879433 | 0.001854173 | HSPA8, HSPA5, BAG1, HSPA1A | 141 | 34 | 19453 | 16.23112224 | 0.991780105 | 0.021224537 | 0.018910923 |
| GOTERM_BP_DIRECT | GO:2000379~positive regulation of reactive oxygen species metabolic process | 4 | 2.836879433 | 0.001854173 | CYP1B1, F2, MAPK14, XDH | 141 | 34 | 19453 | 16.23112224 | 0.991780105 | 0.021224537 | 0.018910923 |
| GOTERM_BP_DIRECT | GO:0021766~hippocampus development | 5 | 3.546099291 | 0.002002154 | ALK, GSK3B, HDAC1, CASP3, IGF1R | 141 | 74 | 19453 | 9.321928311 | 0.99439875 | 0.022790392 | 0.020306089 |
| GOTERM_BP_DIRECT | GO:0045648~positive regulation of erythrocyte differentiation | 4 | 2.836879433 | 0.002017395 | STAT1, STAT3, MAPK14, HSPA1A | 141 | 35 | 19453 | 15.76737589 | 0.994615717 | 0.022790392 | 0.020306089 |
| GOTERM_BP_DIRECT | GO:0097192~extrinsic apoptotic signaling pathway in absence of ligand | 4 | 2.836879433 | 0.002017395 | GSK3B, BCL2, IL2, MCL1 | 141 | 35 | 19453 | 15.76737589 | 0.994615717 | 0.022790392 | 0.020306089 |
| GOTERM_BP_DIRECT | GO:0030163~protein catabolic process | 5 | 3.546099291 | 0.002103289 | NQO1, CASP7, CASP3, MMP2, AKT1 | 141 | 75 | 19453 | 9.197635934 | 0.995690522 | 0.023657427 | 0.021078612 |
| GOTERM_BP_DIRECT | GO:0006979~response to oxidative stress | 6 | 4.255319149 | 0.002112516 | NQO1, MMP14, MAPK8, ABL1, AKT1, PTGS2 | 141 | 125 | 19453 | 6.622297872 | 0.99579239 | 0.023658354 | 0.021079438 |
| GOTERM_BP_DIRECT | GO:0097421~liver regeneration | 4 | 2.836879433 | 0.002189287 | CCND1, TYMS, TNF, AURKA | 141 | 36 | 19453 | 15.32939322 | 0.99655177 | 0.024018714 | 0.021400517 |
| GOTERM_BP_DIRECT | GO:0060326~cell chemotaxis | 5 | 3.546099291 | 0.002207898 | ABCC1, CXCR3, KIT, CXCR2, CXCR4 | 141 | 76 | 19453 | 9.076614408 | 0.996714205 | 0.024018714 | 0.021400517 |
| GOTERM_BP_DIRECT | GO:0009611~response to wounding | 5 | 3.546099291 | 0.002207898 | EDNRA, RPS6KB1, CASP3, F2, AURKA | 141 | 76 | 19453 | 9.076614408 | 0.996714205 | 0.024018714 | 0.021400517 |
| GOTERM_BP_DIRECT | GO:0051272~positive regulation of cellular component movement | 3 | 2.127659574 | 0.002228253 | ADAM17, TGFBR1, VEGFA | 141 | 10 | 19453 | 41.3893617 | 0.996883122 | 0.024018714 | 0.021400517 |
| GOTERM_BP_DIRECT | GO:0010042~response to manganese ion | 3 | 2.127659574 | 0.002228253 | ARG1, SOD2, PTGS2 | 141 | 10 | 19453 | 41.3893617 | 0.996883122 | 0.024018714 | 0.021400517 |
| GOTERM_BP_DIRECT | GO:0014909~smooth muscle cell migration | 3 | 2.127659574 | 0.002228253 | PLAU, BCL2, PLAT | 141 | 10 | 19453 | 41.3893617 | 0.996883122 | 0.024018714 | 0.021400517 |
| GOTERM_BP_DIRECT | GO:0031401~positive regulation of protein modification process | 3 | 2.127659574 | 0.002228253 | FLT1, FLT3, KIT | 141 | 10 | 19453 | 41.3893617 | 0.996883122 | 0.024018714 | 0.021400517 |
| GOTERM_BP_DIRECT | GO:0032872~regulation of stress-activated MAPK cascade | 3 | 2.127659574 | 0.002228253 | MAP2K1, GSTP1, MAPK1 | 141 | 10 | 19453 | 41.3893617 | 0.996883122 | 0.024018714 | 0.021400517 |
| GOTERM_BP_DIRECT | GO:0033197~response to vitamin E | 3 | 2.127659574 | 0.002228253 | CCND1, ARG1, IGF1R | 141 | 10 | 19453 | 41.3893617 | 0.996883122 | 0.024018714 | 0.021400517 |
| GOTERM_BP_DIRECT | GO:0030010~establishment of cell polarity | 4 | 2.836879433 | 0.002370007 | GSK3B, HSP90AA1, PTK2, IGF1R | 141 | 37 | 19453 | 14.9150853 | 0.997841807 | 0.025231305 | 0.022480927 |
| GOTERM_BP_DIRECT | GO:0034612~response to tumor necrosis factor | 4 | 2.836879433 | 0.002370007 | RPS6KB1, CASP3, PTGS2, SELE | 141 | 37 | 19453 | 14.9150853 | 0.997841807 | 0.025231305 | 0.022480927 |
| GOTERM_BP_DIRECT | GO:0046326~positive regulation of glucose import | 4 | 2.836879433 | 0.002370007 | TERT, AKT1, PTPN11, MAPK14 | 141 | 37 | 19453 | 14.9150853 | 0.997841807 | 0.025231305 | 0.022480927 |
| GOTERM_BP_DIRECT | GO:0071260~cellular response to mechanical stimulus | 5 | 3.546099291 | 0.00242778 | MAPK8, CHEK1, PTGS2, FGF2, IGF1R | 141 | 78 | 19453 | 8.843880706 | 0.998142088 | 0.025740434 | 0.022934557 |
| GOTERM_BP_DIRECT | GO:0048678~response to axon injury | 4 | 2.836879433 | 0.002559705 | ARG1, CDK1, SOD2, FGF2 | 141 | 38 | 19453 | 14.52258305 | 0.998680426 | 0.027028396 | 0.024082123 |
| GOTERM_BP_DIRECT | GO:1900015~regulation of cytokine production involved in inflammatory response | 3 | 2.127659574 | 0.002710597 | NOS2, ALOX5, MAPK14 | 141 | 11 | 19453 | 37.62669246 | 0.999107813 | 0.028275461 | 0.02519325 |
| GOTERM_BP_DIRECT | GO:0051974~negative regulation of telomerase activity | 3 | 2.127659574 | 0.002710597 | SRC, POT1, PPARG | 141 | 11 | 19453 | 37.62669246 | 0.999107813 | 0.028275461 | 0.02519325 |
| GOTERM_BP_DIRECT | GO:1903799~negative regulation of production of miRNAs involved in gene silencing by miRNA | 3 | 2.127659574 | 0.002710597 | TERT, ESR1, TNF | 141 | 11 | 19453 | 37.62669246 | 0.999107813 | 0.028275461 | 0.02519325 |
| GOTERM_BP_DIRECT | GO:0051402~neuron apoptotic process | 5 | 3.546099291 | 0.002911859 | CASP7, HSPA5, CASP3, BCL2, ABL1 | 141 | 82 | 19453 | 8.412471891 | 0.999470707 | 0.030252934 | 0.026955165 |
| GOTERM_BP_DIRECT | GO:0008625~extrinsic apoptotic signaling pathway via death domain receptors | 4 | 2.836879433 | 0.002966622 | DAPK1, BCL2, RAF1, TNF | 141 | 40 | 19453 | 13.7964539 | 0.999540815 | 0.030454964 | 0.027135173 |
| GOTERM_BP_DIRECT | GO:0001974~blood vessel remodeling | 4 | 2.836879433 | 0.002966622 | EDNRA, ACE, NOS3, MDM2 | 141 | 40 | 19453 | 13.7964539 | 0.999540815 | 0.030454964 | 0.027135173 |
| GOTERM_BP_DIRECT | GO:0033077~T cell differentiation in thymus | 4 | 2.836879433 | 0.002966622 | ADAM17, CDK6, BCL2, BRAF | 141 | 40 | 19453 | 13.7964539 | 0.999540815 | 0.030454964 | 0.027135173 |
| GOTERM_BP_DIRECT | GO:0065008~regulation of biological quality | 3 | 2.127659574 | 0.003237409 | MDM2, TNF, PTK2 | 141 | 12 | 19453 | 34.49113475 | 0.999772592 | 0.032973136 | 0.029378848 |
| GOTERM_BP_DIRECT | GO:2001028~positive regulation of endothelial cell chemotaxis | 3 | 2.127659574 | 0.003237409 | FGF2, MET, VEGFA | 141 | 12 | 19453 | 34.49113475 | 0.999772592 | 0.032973136 | 0.029378848 |
| GOTERM_BP_DIRECT | GO:0071356~cellular response to tumor necrosis factor | 6 | 4.255319149 | 0.003449107 | IKBKB, CYP1B1, MAPK1, AKT1, TRPV1, MAPK14 | 141 | 140 | 19453 | 5.912765957 | 0.999868731 | 0.034946171 | 0.031136808 |
| GOTERM_BP_DIRECT | GO:0016485~protein processing | 5 | 3.546099291 | 0.003458144 | MMP14, ADAM17, CASP7, CASP3, CTSS | 141 | 86 | 19453 | 8.021194128 | 0.999871775 | 0.034946171 | 0.031136808 |
| GOTERM_BP_DIRECT | GO:0042307~positive regulation of protein import into nucleus | 4 | 2.836879433 | 0.003647869 | HSP90AA1, CDK1, MAPK14, PTGS2 | 141 | 43 | 19453 | 12.83391061 | 0.999921647 | 0.03657766 | 0.032590455 |
| GOTERM_BP_DIRECT | GO:0009409~response to cold | 4 | 2.836879433 | 0.003647869 | HSP90AA1, CHRNA7, PPARG, SOD2 | 141 | 43 | 19453 | 12.83391061 | 0.999921647 | 0.03657766 | 0.032590455 |
| GOTERM_BP_DIRECT | GO:0002523~leukocyte migration involved in inflammatory response | 3 | 2.127659574 | 0.003808033 | ALOX5, SELE, TNF | 141 | 13 | 19453 | 31.83797054 | 0.999948307 | 0.037600694 | 0.033501972 |
| GOTERM_BP_DIRECT | GO:0033690~positive regulation of osteoblast proliferation | 3 | 2.127659574 | 0.003808033 | BMP2, ABL1, IGF1R | 141 | 13 | 19453 | 31.83797054 | 0.999948307 | 0.037600694 | 0.033501972 |
| GOTERM_BP_DIRECT | GO:0051918~negative regulation of fibrinolysis | 3 | 2.127659574 | 0.003808033 | PLAU, PLAT, F2 | 141 | 13 | 19453 | 31.83797054 | 0.999948307 | 0.037600694 | 0.033501972 |
| GOTERM_BP_DIRECT | GO:0014075~response to amine | 3 | 2.127659574 | 0.003808033 | NQO1, ARG1, CDK1 | 141 | 13 | 19453 | 31.83797054 | 0.999948307 | 0.037600694 | 0.033501972 |
| GOTERM_BP_DIRECT | GO:0032722~positive regulation of chemokine production | 4 | 2.836879433 | 0.00415079 | ADAM17, ADORA2B, TLR9, TNF | 141 | 45 | 19453 | 12.26351458 | 0.999978777 | 0.040829257 | 0.0363786 |
| GOTERM_BP_DIRECT | GO:0030890~positive regulation of B cell proliferation | 4 | 2.836879433 | 0.004417241 | BCL2, TLR9, MIF, IL2 | 141 | 46 | 19453 | 11.99691644 | 0.999989379 | 0.04284364 | 0.038173402 |
| GOTERM_BP_DIRECT | GO:0070102~interleukin-6-mediated signaling pathway | 3 | 2.127659574 | 0.004421821 | YAP1, SRC, STAT3 | 141 | 14 | 19453 | 29.56382979 | 0.999989505 | 0.04284364 | 0.038173402 |
| GOTERM_BP_DIRECT | GO:0071498~cellular response to fluid shear stress | 3 | 2.127659574 | 0.004421821 | SRC, MMP2, PTGS2 | 141 | 14 | 19453 | 29.56382979 | 0.999989505 | 0.04284364 | 0.038173402 |
| GOTERM_BP_DIRECT | GO:0019430~removal of superoxide radicals | 3 | 2.127659574 | 0.004421821 | NQO1, NOS3, SOD2 | 141 | 14 | 19453 | 29.56382979 | 0.999989505 | 0.04284364 | 0.038173402 |
| GOTERM_BP_DIRECT | GO:0050728~negative regulation of inflammatory response | 6 | 4.255319149 | 0.00449299 | ALOX5, CHRNA7, STAT3, PPARG, PPARA, IL2 | 141 | 149 | 19453 | 5.55561902 | 0.999991277 | 0.043370769 | 0.03864307 |
| GOTERM_BP_DIRECT | GO:0046427~positive regulation of JAK-STAT cascade | 4 | 2.836879433 | 0.004693837 | KIT, CYP1B1, F2, TNF | 141 | 47 | 19453 | 11.74166289 | 0.999994824 | 0.045141099 | 0.040220422 |
| GOTERM_BP_DIRECT | GO:0008360~regulation of cell shape | 6 | 4.255319149 | 0.004750849 | HCK, KIT, KDR, F2, PTK2, VEGFA | 141 | 151 | 19453 | 5.482034663 | 0.999995537 | 0.045520173 | 0.040558175 |
| GOTERM_BP_DIRECT | GO:0032880~regulation of protein localization | 5 | 3.546099291 | 0.00493348 | HSP90AA1, MAPK8, PARP1, CCNE1, BCL2 | 141 | 95 | 19453 | 7.261291527 | 0.999997224 | 0.047095616 | 0.041961884 |
| GOTERM_BP_DIRECT | GO:0038095~Fc-epsilon receptor signaling pathway | 4 | 2.836879433 | 0.004980686 | MAPK10, IKBKB, MAPK8, SYK | 141 | 48 | 19453 | 11.49704492 | 0.999997545 | 0.04719793 | 0.042053045 |
| GOTERM_BP_DIRECT | GO:0071364~cellular response to epidermal growth factor stimulus | 4 | 2.836879433 | 0.004980686 | PDPK1, AKT1, PTPN11, EGFR | 141 | 48 | 19453 | 11.49704492 | 0.999997545 | 0.04719793 | 0.042053045 |
| GOTERM_BP_DIRECT | GO:0050966~detection of mechanical stimulus involved in sensory perception of pain | 3 | 2.127659574 | 0.005078131 | CXCR4, HTR2A, TNF | 141 | 15 | 19453 | 27.5929078 | 0.999998094 | 0.047598282 | 0.042409757 |
| GOTERM_BP_DIRECT | GO:1903265~positive regulation of tumor necrosis factor-mediated signaling pathway | 3 | 2.127659574 | 0.005078131 | ADAM17, MMP8, HSPA1A | 141 | 15 | 19453 | 27.5929078 | 0.999998094 | 0.047598282 | 0.042409757 |
| GOTERM_BP_DIRECT | GO:0045598~regulation of fat cell differentiation | 3 | 2.127659574 | 0.005078131 | ALOX5, TNF, HDAC6 | 141 | 15 | 19453 | 27.5929078 | 0.999998094 | 0.047598282 | 0.042409757 |
| GOTERM_BP_DIRECT | GO:0016310~phosphorylation | 8 | 5.673758865 | 0.00517252 | ALK, PIK3CA, PDPK1, STAT3, AKT1, TOP1, MET, PIK3CG | 141 | 291 | 19453 | 3.79283956 | 0.999998509 | 0.048307973 | 0.043042087 |
| GOTERM_BP_DIRECT | GO:0051781~positive regulation of cell division | 4 | 2.836879433 | 0.005277894 | FGF1, FGF2, PGF, VEGFA | 141 | 49 | 19453 | 11.26241135 | 0.999998866 | 0.049114789 | 0.043760955 |
| GOTERM_BP_DIRECT | GO:0009408~response to heat | 4 | 2.836879433 | 0.005585561 | HSP90AA1, RPS6KB1, NOS3, AKT1 | 141 | 50 | 19453 | 11.03716312 | 0.999999491 | 0.051791565 | 0.046145944 |
| GOTERM_BP_DIRECT | GO:0048484~enteric nervous system development | 3 | 2.127659574 | 0.005776328 | RET, EDNRA, SLC6A4 | 141 | 16 | 19453 | 25.86835106 | 0.99999969 | 0.052617471 | 0.046881821 |
| GOTERM_BP_DIRECT | GO:2000145~regulation of cell motility | 3 | 2.127659574 | 0.005776328 | CDK6, ABL1, RAF1 | 141 | 16 | 19453 | 25.86835106 | 0.99999969 | 0.052617471 | 0.046881821 |
| GOTERM_BP_DIRECT | GO:0002687~positive regulation of leukocyte migration | 3 | 2.127659574 | 0.005776328 | SELP, SELE, VEGFA | 141 | 16 | 19453 | 25.86835106 | 0.99999969 | 0.052617471 | 0.046881821 |
| GOTERM_BP_DIRECT | GO:0010243~response to organonitrogen compound | 3 | 2.127659574 | 0.005776328 | CCND1, FLT3, TP73 | 141 | 16 | 19453 | 25.86835106 | 0.99999969 | 0.052617471 | 0.046881821 |
| GOTERM_BP_DIRECT | GO:0090336~positive regulation of brown fat cell differentiation | 3 | 2.127659574 | 0.005776328 | PIM1, MAPK14, PTGS2 | 141 | 16 | 19453 | 25.86835106 | 0.99999969 | 0.052617471 | 0.046881821 |
| GOTERM_BP_DIRECT | GO:0071346~cellular response to interferon-gamma | 5 | 3.546099291 | 0.005911776 | RPS6KB1, NOS2, STAT1, DAPK1, TNF | 141 | 100 | 19453 | 6.89822695 | 0.999999782 | 0.053662329 | 0.047812783 |
| GOTERM_BP_DIRECT | GO:0097191~extrinsic apoptotic signaling pathway | 4 | 2.836879433 | 0.006232659 | YAP1, GSK3B, PDPK1, TNF | 141 | 52 | 19453 | 10.61265685 | 0.999999905 | 0.056377232 | 0.050231744 |
| GOTERM_BP_DIRECT | GO:0044342~type B pancreatic cell proliferation | 3 | 2.127659574 | 0.006515784 | MAP2K1, IGFBP3, RAF1 | 141 | 17 | 19453 | 24.34668335 | 0.999999955 | 0.057055264 | 0.050835866 |
| GOTERM_BP_DIRECT | GO:0071732~cellular response to nitric oxide | 3 | 2.127659574 | 0.006515784 | CCNA2, CDK2, MMP3 | 141 | 17 | 19453 | 24.34668335 | 0.999999955 | 0.057055264 | 0.050835866 |
| GOTERM_BP_DIRECT | GO:0048708~astrocyte differentiation | 3 | 2.127659574 | 0.006515784 | BMP2, STAT3, NR3C1 | 141 | 17 | 19453 | 24.34668335 | 0.999999955 | 0.057055264 | 0.050835866 |
| GOTERM_BP_DIRECT | GO:0071383~cellular response to steroid hormone stimulus | 3 | 2.127659574 | 0.006515784 | HSPA8, NR3C1, HSPA1A | 141 | 17 | 19453 | 24.34668335 | 0.999999955 | 0.057055264 | 0.050835866 |
| GOTERM_BP_DIRECT | GO:0002407~dendritic cell chemotaxis | 3 | 2.127659574 | 0.006515784 | CXCR2, CXCR4, PIK3CG | 141 | 17 | 19453 | 24.34668335 | 0.999999955 | 0.057055264 | 0.050835866 |
| GOTERM_BP_DIRECT | GO:0010039~response to iron ion | 3 | 2.127659574 | 0.006515784 | CCND1, MDM2, BCL2 | 141 | 17 | 19453 | 24.34668335 | 0.999999955 | 0.057055264 | 0.050835866 |
| GOTERM_BP_DIRECT | GO:0042770~signal transduction in response to DNA damage | 3 | 2.127659574 | 0.006515784 | CHEK1, ABL1, MAPK14 | 141 | 17 | 19453 | 24.34668335 | 0.999999955 | 0.057055264 | 0.050835866 |
| GOTERM_BP_DIRECT | GO:0007179~transforming growth factor beta receptor signaling pathway | 5 | 3.546099291 | 0.006556659 | PARP1, SRC, STAT3, PTK2, TGFBR1 | 141 | 103 | 19453 | 6.697307719 | 0.999999959 | 0.057055264 | 0.050835866 |
| GOTERM_BP_DIRECT | GO:0050727~regulation of inflammatory response | 5 | 3.546099291 | 0.006556659 | HCK, ALOX5, PTGS2, SELE, ESR1 | 141 | 103 | 19453 | 6.697307719 | 0.999999959 | 0.057055264 | 0.050835866 |
| GOTERM_BP_DIRECT | GO:0043434~response to peptide hormone | 4 | 2.836879433 | 0.006572272 | STAT1, STAT3, BRAF, TRPV1 | 141 | 53 | 19453 | 10.41241804 | 0.999999961 | 0.057055264 | 0.050835866 |
| GOTERM_BP_DIRECT | GO:0031667~response to nutrient levels | 4 | 2.836879433 | 0.006572272 | ACE, RPS6KB1, SRC, TNF | 141 | 53 | 19453 | 10.41241804 | 0.999999961 | 0.057055264 | 0.050835866 |
| GOTERM_BP_DIRECT | GO:0001837~epithelial to mesenchymal transition | 4 | 2.836879433 | 0.006572272 | GSK3B, BMP2, TGFBR1, FGFR1 | 141 | 53 | 19453 | 10.41241804 | 0.999999961 | 0.057055264 | 0.050835866 |
| GOTERM_BP_DIRECT | GO:0051092~positive regulation of NF-kappaB transcription factor activity | 6 | 4.255319149 | 0.006691923 | ALK, IKBKB, STAT3, TLR9, TNF, HSPA1A | 141 | 164 | 19453 | 5.047483134 | 0.999999971 | 0.057899681 | 0.051588236 |
| GOTERM_BP_DIRECT | GO:0045786~negative regulation of cell cycle | 4 | 2.836879433 | 0.00728406 | BMP2, CDK6, CASP3, PTGS2 | 141 | 55 | 19453 | 10.03378466 | 0.999999994 | 0.062086961 | 0.055319074 |
| GOTERM_BP_DIRECT | GO:0008631~intrinsic apoptotic signaling pathway in response to oxidative stress | 3 | 2.127659574 | 0.007295878 | BCL2, CYP1B1, SOD2 | 141 | 18 | 19453 | 22.99408983 | 0.999999994 | 0.062086961 | 0.055319074 |
| GOTERM_BP_DIRECT | GO:0051770~positive regulation of nitric-oxide synthase biosynthetic process | 3 | 2.127659574 | 0.007295878 | STAT1, TLR9, KDR | 141 | 18 | 19453 | 22.99408983 | 0.999999994 | 0.062086961 | 0.055319074 |
| GOTERM_BP_DIRECT | GO:0060749~mammary gland alveolus development | 3 | 2.127659574 | 0.007295878 | CCND1, ESR1, VEGFA | 141 | 18 | 19453 | 22.99408983 | 0.999999994 | 0.062086961 | 0.055319074 |
| GOTERM_BP_DIRECT | GO:0060065~uterus development | 3 | 2.127659574 | 0.007295878 | SRC, ESR1, CYP19A1 | 141 | 18 | 19453 | 22.99408983 | 0.999999994 | 0.062086961 | 0.055319074 |
| GOTERM_BP_DIRECT | GO:1903078~positive regulation of protein localization to plasma membrane | 4 | 2.836879433 | 0.007656395 | PDPK1, AKT1, TNF, EGFR | 141 | 56 | 19453 | 9.854609929 | 0.999999998 | 0.06494129 | 0.057862262 |
| GOTERM_BP_DIRECT | GO:0045600~positive regulation of fat cell differentiation | 4 | 2.836879433 | 0.008039793 | BMP2, AKT1, PPARG, HTR2A | 141 | 57 | 19453 | 9.681722036 | 0.999999999 | 0.06794847 | 0.060541641 |
| GOTERM_BP_DIRECT | GO:0042730~fibrinolysis | 3 | 2.127659574 | 0.008115994 | PLAU, PLAT, F2 | 141 | 19 | 19453 | 21.78387458 | 0.999999999 | 0.06794847 | 0.060541641 |
| GOTERM_BP_DIRECT | GO:1902531~regulation of intracellular signal transduction | 3 | 2.127659574 | 0.008115994 | BRAF, RAF1, PTK2 | 141 | 19 | 19453 | 21.78387458 | 0.999999999 | 0.06794847 | 0.060541641 |
| GOTERM_BP_DIRECT | GO:0031396~regulation of protein ubiquitination | 3 | 2.127659574 | 0.008115994 | HSP90AA1, TGFBR1, HSPA1A | 141 | 19 | 19453 | 21.78387458 | 0.999999999 | 0.06794847 | 0.060541641 |
| GOTERM_BP_DIRECT | GO:0008543~fibroblast growth factor receptor signaling pathway | 4 | 2.836879433 | 0.008434326 | PTPN11, FGF1, FGF2, FGFR1 | 141 | 58 | 19453 | 9.514795794 | 1 | 0.070159493 | 0.062511647 |
| GOTERM_BP_DIRECT | GO:0045165~cell fate commitment | 4 | 2.836879433 | 0.008434326 | BMP2, CASP3, KDR, PPARG | 141 | 58 | 19453 | 9.514795794 | 1 | 0.070159493 | 0.062511647 |
| GOTERM_BP_DIRECT | GO:0071320~cellular response to cAMP | 4 | 2.836879433 | 0.008840064 | HSPA5, APEX1, CYP1B1, PIK3CG | 141 | 59 | 19453 | 9.353528068 | 1 | 0.072561515 | 0.064651833 |
| GOTERM_BP_DIRECT | GO:0048514~blood vessel morphogenesis | 3 | 2.127659574 | 0.008975526 | FLT1, SYK, CYP1B1 | 141 | 20 | 19453 | 20.69468085 | 1 | 0.072561515 | 0.064651833 |
| GOTERM_BP_DIRECT | GO:0071375~cellular response to peptide hormone stimulus | 3 | 2.127659574 | 0.008975526 | SRC, APEX1, MDM2 | 141 | 20 | 19453 | 20.69468085 | 1 | 0.072561515 | 0.064651833 |
| GOTERM_BP_DIRECT | GO:0071168~protein localization to chromatin | 3 | 2.127659574 | 0.008975526 | PARP1, PLK1, ESR1 | 141 | 20 | 19453 | 20.69468085 | 1 | 0.072561515 | 0.064651833 |
| GOTERM_BP_DIRECT | GO:0050965~detection of temperature stimulus involved in sensory perception of pain | 3 | 2.127659574 | 0.008975526 | CXCR4, TRPV1, HTR2A | 141 | 20 | 19453 | 20.69468085 | 1 | 0.072561515 | 0.064651833 |
| GOTERM_BP_DIRECT | GO:0042310~vasoconstriction | 3 | 2.127659574 | 0.008975526 | EDNRA, ACE, SLC6A4 | 141 | 20 | 19453 | 20.69468085 | 1 | 0.072561515 | 0.064651833 |
| GOTERM_BP_DIRECT | GO:0050901~leukocyte tethering or rolling | 3 | 2.127659574 | 0.008975526 | SELP, SELE, TNF | 141 | 20 | 19453 | 20.69468085 | 1 | 0.072561515 | 0.064651833 |
| GOTERM_BP_DIRECT | GO:0033189~response to vitamin A | 3 | 2.127659574 | 0.008975526 | ARG1, PPARG, TYMS | 141 | 20 | 19453 | 20.69468085 | 1 | 0.072561515 | 0.064651833 |
| GOTERM_BP_DIRECT | GO:0035994~response to muscle stretch | 3 | 2.127659574 | 0.008975526 | PIK3CA, RAF1, MAPK14 | 141 | 20 | 19453 | 20.69468085 | 1 | 0.072561515 | 0.064651833 |
| GOTERM_BP_DIRECT | GO:0007254~JNK cascade | 4 | 2.836879433 | 0.009257071 | MAPK10, MAPK8, ADORA2B, TNF | 141 | 60 | 19453 | 9.197635934 | 1 | 0.074604495 | 0.066472115 |
| GOTERM_BP_DIRECT | GO:0050729~positive regulation of inflammatory response | 5 | 3.546099291 | 0.00931608 | ABCC1, ACE, TLR9, TNF, IL2 | 141 | 114 | 19453 | 6.051076272 | 1 | 0.074846894 | 0.06668809 |
| GOTERM_BP_DIRECT | GO:0045599~negative regulation of fat cell differentiation | 4 | 2.836879433 | 0.00968541 | YAP1, BMP2, SOD2, TNF | 141 | 61 | 19453 | 9.046855017 | 1 | 0.07757324 | 0.069117247 |
| GOTERM_BP_DIRECT | GO:0060218~hematopoietic stem cell differentiation | 3 | 2.127659574 | 0.00987387 | ACE, CDK6, BCL2 | 141 | 21 | 19453 | 19.70921986 | 1 | 0.077877142 | 0.069388022 |
| GOTERM_BP_DIRECT | GO:0035265~organ growth | 3 | 2.127659574 | 0.00987387 | YAP1, BCL2, PTPN11 | 141 | 21 | 19453 | 19.70921986 | 1 | 0.077877142 | 0.069388022 |
| GOTERM_BP_DIRECT | GO:0044267~cellular protein metabolic process | 3 | 2.127659574 | 0.00987387 | MMP13, MMP1, MMP2 | 141 | 21 | 19453 | 19.70921986 | 1 | 0.077877142 | 0.069388022 |
| GOTERM_BP_DIRECT | GO:0003203~endocardial cushion morphogenesis | 3 | 2.127659574 | 0.00987387 | BMP2, NOS3, MDM2 | 141 | 21 | 19453 | 19.70921986 | 1 | 0.077877142 | 0.069388022 |
| GOTERM_BP_DIRECT | GO:0006801~superoxide metabolic process | 3 | 2.127659574 | 0.00987387 | NOS2, NOX4, SOD2 | 141 | 21 | 19453 | 19.70921986 | 1 | 0.077877142 | 0.069388022 |
| GOTERM_BP_DIRECT | GO:0006805~xenobiotic metabolic process | 5 | 3.546099291 | 0.010481337 | NQO1, ABCC1, ABCB1, GSTP1, CYP1B1 | 141 | 118 | 19453 | 5.845955043 | 1 | 0.082315722 | 0.073342768 |
| GOTERM_BP_DIRECT | GO:0045892~negative regulation of transcription, DNA-templated | 11 | 7.80141844 | 0.010500266 | HSPA8, BMP2, PARP1, HDAC1, SRC, APEX1, MDM2, PPARG, NR3C1, TNF, HDAC6 | 141 | 591 | 19453 | 2.5678679 | 1 | 0.082315722 | 0.073342768 |
| GOTERM_BP_DIRECT | GO:0001822~kidney development | 5 | 3.546099291 | 0.010786691 | ACE, ODC1, TGFBR1, TP73, VEGFA | 141 | 119 | 19453 | 5.79682937 | 1 | 0.083482363 | 0.074382236 |
| GOTERM_BP_DIRECT | GO:0007004~telomere maintenance via telomerase | 3 | 2.127659574 | 0.010810433 | HSP90AA1, TERT, POT1 | 141 | 22 | 19453 | 18.81334623 | 1 | 0.083482363 | 0.074382236 |
| GOTERM_BP_DIRECT | GO:1902004~positive regulation of beta-amyloid formation | 3 | 2.127659574 | 0.010810433 | CHRNA7, CASP3, TNF | 141 | 22 | 19453 | 18.81334623 | 1 | 0.083482363 | 0.074382236 |
| GOTERM_BP_DIRECT | GO:0097194~execution phase of apoptosis | 3 | 2.127659574 | 0.010810433 | CASP7, CASP3, AKT1 | 141 | 22 | 19453 | 18.81334623 | 1 | 0.083482363 | 0.074382236 |
| GOTERM_BP_DIRECT | GO:0071391~cellular response to estrogen stimulus | 3 | 2.127659574 | 0.010810433 | MDM2, ESR1, ESR2 | 141 | 22 | 19453 | 18.81334623 | 1 | 0.083482363 | 0.074382236 |
| GOTERM_BP_DIRECT | GO:0043254~regulation of protein complex assembly | 3 | 2.127659574 | 0.011784627 | HSPA8, HSP90AA1, PTPN11 | 141 | 23 | 19453 | 17.99537465 | 1 | 0.090734611 | 0.080843942 |
| GOTERM_BP_DIRECT | GO:0001836~release of cytochrome c from mitochondria | 3 | 2.127659574 | 0.012795868 | BCL2, SOD2, MCL1 | 141 | 24 | 19453 | 17.24556738 | 1 | 0.097648701 | 0.087004351 |
| GOTERM_BP_DIRECT | GO:0051247~positive regulation of protein metabolic process | 3 | 2.127659574 | 0.012795868 | MAPK8, CHRNA7, AKT1 | 141 | 24 | 19453 | 17.24556738 | 1 | 0.097648701 | 0.087004351 |
| GOTERM_BP_DIRECT | GO:0071310~cellular response to organic substance | 3 | 2.127659574 | 0.012795868 | DAPK1, STAT3, BCL2 | 141 | 24 | 19453 | 17.24556738 | 1 | 0.097648701 | 0.087004351 |
| GOTERM_BP_DIRECT | GO:0042531~positive regulation of tyrosine phosphorylation of STAT protein | 4 | 2.836879433 | 0.013005671 | FLT3, KIT, TNF, IL2 | 141 | 68 | 19453 | 8.115561118 | 1 | 0.098957854 | 0.088170798 |
| GOTERM_BP_DIRECT | GO:0010468~regulation of gene expression | 7 | 4.964539007 | 0.013547294 | CDK6, CDK4, CDK2, MDM2, BCL2, TGFBR1, TP73 | 141 | 270 | 19453 | 3.576858419 | 1 | 0.102776687 | 0.091573353 |
| GOTERM_BP_DIRECT | GO:0001649~osteoblast differentiation | 5 | 3.546099291 | 0.013795485 | BMP2, IGFBP3, AKT1, MAPK14, FGF2 | 141 | 128 | 19453 | 5.389239805 | 1 | 0.103208483 | 0.09195808 |
| GOTERM_BP_DIRECT | GO:0016525~negative regulation of angiogenesis | 5 | 3.546099291 | 0.013795485 | SPARC, STAT1, ALOX5, CXCR3, PPARG | 141 | 128 | 19453 | 5.389239805 | 1 | 0.103208483 | 0.09195808 |
| GOTERM_BP_DIRECT | GO:0009314~response to radiation | 3 | 2.127659574 | 0.013843581 | BCL2, TNF, CDC25A | 141 | 25 | 19453 | 16.55574468 | 1 | 0.103208483 | 0.09195808 |
| GOTERM_BP_DIRECT | GO:0071385~cellular response to glucocorticoid stimulus | 3 | 2.127659574 | 0.013843581 | FLT3, SSTR2, NR3C1 | 141 | 25 | 19453 | 16.55574468 | 1 | 0.103208483 | 0.09195808 |
| GOTERM_BP_DIRECT | GO:0071353~cellular response to interleukin-4 | 3 | 2.127659574 | 0.013843581 | HSPA5, CDK4, ARG1 | 141 | 25 | 19453 | 16.55574468 | 1 | 0.103208483 | 0.09195808 |
| GOTERM_BP_DIRECT | GO:0036120~cellular response to platelet-derived growth factor stimulus | 3 | 2.127659574 | 0.013843581 | CCNA2, HDAC1, SRC | 141 | 25 | 19453 | 16.55574468 | 1 | 0.103208483 | 0.09195808 |
| GOTERM_BP_DIRECT | GO:0001819~positive regulation of cytokine production | 4 | 2.836879433 | 0.014059173 | SRC, MIF, TNF, PIK3CG | 141 | 70 | 19453 | 7.883687943 | 1 | 0.104514596 | 0.093121818 |
| GOTERM_BP_DIRECT | GO:1903210~glomerular visceral epithelial cell apoptotic process | 2 | 1.418439716 | 0.01434224 | EDNRA, ABL1 | 141 | 2 | 19453 | 137.964539 | 1 | 0.105108708 | 0.093651169 |
| GOTERM_BP_DIRECT | GO:1901327~response to tacrolimus | 2 | 1.418439716 | 0.01434224 | CXCR4, IL2 | 141 | 2 | 19453 | 137.964539 | 1 | 0.105108708 | 0.093651169 |
| GOTERM_BP_DIRECT | GO:0010727~negative regulation of hydrogen peroxide metabolic process | 2 | 1.418439716 | 0.01434224 | MMP3, HDAC6 | 141 | 2 | 19453 | 137.964539 | 1 | 0.105108708 | 0.093651169 |
| GOTERM_BP_DIRECT | GO:1905784~regulation of anaphase-promoting complex-dependent catabolic process | 2 | 1.418439716 | 0.01434224 | PLK1, CDK2 | 141 | 2 | 19453 | 137.964539 | 1 | 0.105108708 | 0.093651169 |
| GOTERM_BP_DIRECT | GO:0032227~negative regulation of synaptic transmission, dopaminergic | 2 | 1.418439716 | 0.01434224 | PTGS2, SLC6A4 | 141 | 2 | 19453 | 137.964539 | 1 | 0.105108708 | 0.093651169 |
| GOTERM_BP_DIRECT | GO:0071466~cellular response to xenobiotic stimulus | 4 | 2.836879433 | 0.014603592 | NOS2, HSPA5, CXCR4, BRAF | 141 | 71 | 19453 | 7.772650085 | 1 | 0.106421107 | 0.094820507 |
| GOTERM_BP_DIRECT | GO:0060079~excitatory postsynaptic potential | 4 | 2.836879433 | 0.014603592 | GSK3B, CHRNA7, AKT1, TRPV1 | 141 | 71 | 19453 | 7.772650085 | 1 | 0.106421107 | 0.094820507 |
| GOTERM_BP_DIRECT | GO:0046697~decidualization | 3 | 2.127659574 | 0.014927197 | PARP1, PTGS2, CTSB | 141 | 26 | 19453 | 15.91898527 | 1 | 0.107867758 | 0.096109464 |
| GOTERM_BP_DIRECT | GO:0043393~regulation of protein binding | 3 | 2.127659574 | 0.014927197 | SRC, PLK1, TGFBR1 | 141 | 26 | 19453 | 15.91898527 | 1 | 0.107867758 | 0.096109464 |
| GOTERM_BP_DIRECT | GO:0051894~positive regulation of focal adhesion assembly | 3 | 2.127659574 | 0.014927197 | ABL1, KDR, VEGFA | 141 | 26 | 19453 | 15.91898527 | 1 | 0.107867758 | 0.096109464 |
| GOTERM_BP_DIRECT | GO:0009791~post-embryonic development | 4 | 2.836879433 | 0.015159832 | BCL2, ABL1, SOD2, TGFBR1 | 141 | 72 | 19453 | 7.664696612 | 1 | 0.10894024 | 0.097065038 |
| GOTERM_BP_DIRECT | GO:1901224~positive regulation of NIK/NF-kappaB signaling | 4 | 2.836879433 | 0.015159832 | TLR9, MMP8, TNF, EGFR | 141 | 72 | 19453 | 7.664696612 | 1 | 0.10894024 | 0.097065038 |
| GOTERM_BP_DIRECT | GO:0034620~cellular response to unfolded protein | 3 | 2.127659574 | 0.016046151 | HSPA8, HSPA5, HSPA1A | 141 | 27 | 19453 | 15.32939322 | 1 | 0.113579226 | 0.101198344 |
| GOTERM_BP_DIRECT | GO:0035902~response to immobilization stress | 3 | 2.127659574 | 0.016046151 | PPARG, SOD2, HDAC6 | 141 | 27 | 19453 | 15.32939322 | 1 | 0.113579226 | 0.101198344 |
| GOTERM_BP_DIRECT | GO:0003009~skeletal muscle contraction | 3 | 2.127659574 | 0.016046151 | HSP90AA1, RPS6KB1, TNF | 141 | 27 | 19453 | 15.32939322 | 1 | 0.113579226 | 0.101198344 |
| GOTERM_BP_DIRECT | GO:1902894~negative regulation of pri-miRNA transcription from RNA polymerase II promoter | 3 | 2.127659574 | 0.016046151 | PPARG, PPARA, ESR1 | 141 | 27 | 19453 | 15.32939322 | 1 | 0.113579226 | 0.101198344 |
| GOTERM_BP_DIRECT | GO:0040014~regulation of multicellular organism growth | 3 | 2.127659574 | 0.016046151 | PIK3CA, CDK4, STAT3 | 141 | 27 | 19453 | 15.32939322 | 1 | 0.113579226 | 0.101198344 |
| GOTERM_BP_DIRECT | GO:0001501~skeletal system development | 5 | 3.546099291 | 0.016068804 | MMP14, BMP2, MMP9, TGFBR1, FGFR1 | 141 | 134 | 19453 | 5.14793056 | 1 | 0.113579226 | 0.101198344 |
| GOTERM_BP_DIRECT | GO:0032092~positive regulation of protein binding | 4 | 2.836879433 | 0.016307883 | GSK3B, BMP2, ACE, TERT | 141 | 74 | 19453 | 7.457542649 | 1 | 0.114955022 | 0.102424169 |
| GOTERM_BP_DIRECT | GO:0060333~interferon-gamma-mediated signaling pathway | 3 | 2.127659574 | 0.017199889 | HCK, STAT1, RAF1 | 141 | 28 | 19453 | 14.78191489 | 1 | 0.119292524 | 0.106288855 |
| GOTERM_BP_DIRECT | GO:0043200~response to amino acid | 3 | 2.127659574 | 0.017199889 | ARG1, CASP3, BCL2 | 141 | 28 | 19453 | 14.78191489 | 1 | 0.119292524 | 0.106288855 |
| GOTERM_BP_DIRECT | GO:0031638~zymogen activation | 3 | 2.127659574 | 0.017199889 | MMP14, CTSL, F2 | 141 | 28 | 19453 | 14.78191489 | 1 | 0.119292524 | 0.106288855 |
| GOTERM_BP_DIRECT | GO:1902042~negative regulation of extrinsic apoptotic signaling pathway via death domain receptors | 3 | 2.127659574 | 0.017199889 | GSK3B, NOS3, RAF1 | 141 | 28 | 19453 | 14.78191489 | 1 | 0.119292524 | 0.106288855 |
| GOTERM_BP_DIRECT | GO:0010332~response to gamma radiation | 3 | 2.127659574 | 0.017199889 | PARP1, BCL2, SOD2 | 141 | 28 | 19453 | 14.78191489 | 1 | 0.119292524 | 0.106288855 |
| GOTERM_BP_DIRECT | GO:0002092~positive regulation of receptor internalization | 3 | 2.127659574 | 0.017199889 | SYK, SELE, VEGFA | 141 | 28 | 19453 | 14.78191489 | 1 | 0.119292524 | 0.106288855 |
| GOTERM_BP_DIRECT | GO:0098869~cellular oxidant detoxification | 4 | 2.836879433 | 0.017503515 | GSTP1, ALB, GSR, PTGS2 | 141 | 76 | 19453 | 7.261291527 | 1 | 0.121073781 | 0.107875943 |
| GOTERM_BP_DIRECT | GO:0071333~cellular response to glucose stimulus | 4 | 2.836879433 | 0.018119224 | ACE, PIK3CA, NOX4, IGF1R | 141 | 77 | 19453 | 7.166989039 | 1 | 0.124998484 | 0.111372828 |
| GOTERM_BP_DIRECT | GO:0010467~gene expression | 5 | 3.546099291 | 0.018574987 | EDNRA, NOX4, AKT1, NR3C1, IL2 | 141 | 140 | 19453 | 4.927304965 | 1 | 0.127801841 | 0.113870601 |
| GOTERM_BP_DIRECT | GO:0032729~positive regulation of interferon-gamma production | 4 | 2.836879433 | 0.019386502 | ABL1, TLR9, TNF, IL2 | 141 | 79 | 19453 | 6.985546279 | 1 | 0.13276399 | 0.118291843 |
| GOTERM_BP_DIRECT | GO:0050852~T cell receptor signaling pathway | 5 | 3.546099291 | 0.019450155 | IKBKB, PIK3CA, ABL1, MAPK1, BRAF | 141 | 142 | 19453 | 4.857906303 | 1 | 0.13276399 | 0.118291843 |
| GOTERM_BP_DIRECT | GO:0009887~animal organ morphogenesis | 5 | 3.546099291 | 0.019450155 | BMP2, SYK, BRAF, FGF1, FGF2 | 141 | 142 | 19453 | 4.857906303 | 1 | 0.13276399 | 0.118291843 |
| GOTERM_BP_DIRECT | GO:0071480~cellular response to gamma radiation | 3 | 2.127659574 | 0.01960951 | YAP1, HSPA5, MDM2 | 141 | 30 | 19453 | 13.7964539 | 1 | 0.132800533 | 0.118324402 |
| GOTERM_BP_DIRECT | GO:0001774~microglial cell activation | 3 | 2.127659574 | 0.01960951 | TLR9, TRPV1, TNF | 141 | 30 | 19453 | 13.7964539 | 1 | 0.132800533 | 0.118324402 |
| GOTERM_BP_DIRECT | GO:0001935~endothelial cell proliferation | 3 | 2.127659574 | 0.01960951 | MMP14, FGF2, TGFBR1 | 141 | 30 | 19453 | 13.7964539 | 1 | 0.132800533 | 0.118324402 |
| GOTERM_BP_DIRECT | GO:0002244~hematopoietic progenitor cell differentiation | 4 | 2.836879433 | 0.020038095 | TOP2A, FLT1, KIT, KDR | 141 | 80 | 19453 | 6.89822695 | 1 | 0.135348698 | 0.1205948 |
| GOTERM_BP_DIRECT | GO:0010575~positive regulation of vascular endothelial growth factor production | 3 | 2.127659574 | 0.020864311 | ADORA2B, CYP1B1, PTGS2 | 141 | 31 | 19453 | 13.351407 | 1 | 0.138988577 | 0.123837909 |
| GOTERM_BP_DIRECT | GO:0045776~negative regulation of blood pressure | 3 | 2.127659574 | 0.020864311 | NOS2, NOS3, PPARA | 141 | 31 | 19453 | 13.351407 | 1 | 0.138988577 | 0.123837909 |
| GOTERM_BP_DIRECT | GO:0032148~activation of protein kinase B activity | 3 | 2.127659574 | 0.020864311 | PDPK1, SRC, FGF1 | 141 | 31 | 19453 | 13.351407 | 1 | 0.138988577 | 0.123837909 |
| GOTERM_BP_DIRECT | GO:0070372~regulation of ERK1 and ERK2 cascade | 3 | 2.127659574 | 0.020864311 | SYK, GSTP1, EGFR | 141 | 31 | 19453 | 13.351407 | 1 | 0.138988577 | 0.123837909 |
| GOTERM_BP_DIRECT | GO:0048873~homeostasis of number of cells within a tissue | 3 | 2.127659574 | 0.020864311 | NOS3, BCL2, PTPN11 | 141 | 31 | 19453 | 13.351407 | 1 | 0.138988577 | 0.123837909 |
| GOTERM_BP_DIRECT | GO:0006919~activation of cysteine-type endopeptidase activity involved in apoptotic process | 4 | 2.836879433 | 0.021377232 | RET, PPARG, TNF, XDH | 141 | 82 | 19453 | 6.729977513 | 1 | 0.138988577 | 0.123837909 |
| GOTERM_BP_DIRECT | GO:0048002~antigen processing and presentation of peptide antigen | 2 | 1.418439716 | 0.021436584 | CTSL, CTSS | 141 | 3 | 19453 | 91.97635934 | 1 | 0.138988577 | 0.123837909 |
| GOTERM_BP_DIRECT | GO:0046038~GMP catabolic process | 2 | 1.418439716 | 0.021436584 | HPRT1, XDH | 141 | 3 | 19453 | 91.97635934 | 1 | 0.138988577 | 0.123837909 |
| GOTERM_BP_DIRECT | GO:2000544~regulation of endothelial cell chemotaxis to fibroblast growth factor | 2 | 1.418439716 | 0.021436584 | FGF1, FGF2 | 141 | 3 | 19453 | 91.97635934 | 1 | 0.138988577 | 0.123837909 |
| GOTERM_BP_DIRECT | GO:0021697~cerebellar cortex formation | 2 | 1.418439716 | 0.021436584 | MAP2K1, PTPN11 | 141 | 3 | 19453 | 91.97635934 | 1 | 0.138988577 | 0.123837909 |
| GOTERM_BP_DIRECT | GO:1904999~positive regulation of leukocyte adhesion to arterial endothelial cell | 2 | 1.418439716 | 0.021436584 | ALOX5, TNF | 141 | 3 | 19453 | 91.97635934 | 1 | 0.138988577 | 0.123837909 |
| GOTERM_BP_DIRECT | GO:0031281~positive regulation of cyclase activity | 2 | 1.418439716 | 0.021436584 | MAPK8, MAPK14 | 141 | 3 | 19453 | 91.97635934 | 1 | 0.138988577 | 0.123837909 |
| GOTERM_BP_DIRECT | GO:0014042~positive regulation of neuron maturation | 2 | 1.418439716 | 0.021436584 | RET, BCL2 | 141 | 3 | 19453 | 91.97635934 | 1 | 0.138988577 | 0.123837909 |
| GOTERM_BP_DIRECT | GO:1905039~carboxylic acid transmembrane transport | 2 | 1.418439716 | 0.021436584 | ABCC1, ABCB1 | 141 | 3 | 19453 | 91.97635934 | 1 | 0.138988577 | 0.123837909 |
| GOTERM_BP_DIRECT | GO:0060128~corticotropin hormone secreting cell differentiation | 2 | 1.418439716 | 0.021436584 | BMP2, FGF2 | 141 | 3 | 19453 | 91.97635934 | 1 | 0.138988577 | 0.123837909 |
| GOTERM_BP_DIRECT | GO:1902033~regulation of hematopoietic stem cell proliferation | 2 | 1.418439716 | 0.021436584 | ACE, PIM1 | 141 | 3 | 19453 | 91.97635934 | 1 | 0.138988577 | 0.123837909 |
| GOTERM_BP_DIRECT | GO:0001889~liver development | 4 | 2.836879433 | 0.022064786 | PIK3CA, ARG1, SOD2, MET | 141 | 83 | 19453 | 6.648893446 | 1 | 0.141149051 | 0.125762877 |
| GOTERM_BP_DIRECT | GO:1900745~positive regulation of p38MAPK cascade | 3 | 2.127659574 | 0.022151726 | BMP2, XDH, VEGFA | 141 | 32 | 19453 | 12.93417553 | 1 | 0.141149051 | 0.125762877 |
| GOTERM_BP_DIRECT | GO:0007159~leukocyte cell-cell adhesion | 3 | 2.127659574 | 0.022151726 | SELP, SYK, SELE | 141 | 32 | 19453 | 12.93417553 | 1 | 0.141149051 | 0.125762877 |
| GOTERM_BP_DIRECT | GO:0048008~platelet-derived growth factor receptor signaling pathway | 3 | 2.127659574 | 0.022151726 | SRC, PTPN11, PLAT | 141 | 32 | 19453 | 12.93417553 | 1 | 0.141149051 | 0.125762877 |
| GOTERM_BP_DIRECT | GO:0030225~macrophage differentiation | 3 | 2.127659574 | 0.022151726 | PARP1, MMP9, VEGFA | 141 | 32 | 19453 | 12.93417553 | 1 | 0.141149051 | 0.125762877 |
| GOTERM_BP_DIRECT | GO:0046677~response to antibiotic | 3 | 2.127659574 | 0.022151726 | HSP90AA1, CASP3, MDM2 | 141 | 32 | 19453 | 12.93417553 | 1 | 0.141149051 | 0.125762877 |
| GOTERM_BP_DIRECT | GO:0001569~branching involved in blood vessel morphogenesis | 3 | 2.127659574 | 0.022151726 | EDNRA, KDR, VEGFA | 141 | 32 | 19453 | 12.93417553 | 1 | 0.141149051 | 0.125762877 |
| GOTERM_BP_DIRECT | GO:0043388~positive regulation of DNA binding | 3 | 2.127659574 | 0.023471227 | PPARG, MMP8, MMP9 | 141 | 33 | 19453 | 12.54223082 | 1 | 0.148489215 | 0.132302914 |
| GOTERM_BP_DIRECT | GO:0001933~negative regulation of protein phosphorylation | 4 | 2.836879433 | 0.023475875 | CHRNA7, IGFBP3, XDH, IL2 | 141 | 85 | 19453 | 6.492448894 | 1 | 0.148489215 | 0.132302914 |
| GOTERM_BP_DIRECT | GO:0007005~mitochondrion organization | 4 | 2.836879433 | 0.023475875 | EDNRA, TERT, PARP1, NOS3 | 141 | 85 | 19453 | 6.492448894 | 1 | 0.148489215 | 0.132302914 |
| GOTERM_BP_DIRECT | GO:0007565~female pregnancy | 4 | 2.836879433 | 0.024199407 | ACE, IGFBP2, BCL2, PGF | 141 | 86 | 19453 | 6.416955303 | 1 | 0.152692359 | 0.136047888 |
| GOTERM_BP_DIRECT | GO:0071897~DNA biosynthetic process | 3 | 2.127659574 | 0.024822293 | TERT, SRC, TYMS | 141 | 34 | 19453 | 12.17334168 | 1 | 0.155484918 | 0.13853604 |
| GOTERM_BP_DIRECT | GO:0051973~positive regulation of telomerase activity | 3 | 2.127659574 | 0.024822293 | HSP90AA1, POT1, MAPK1 | 141 | 34 | 19453 | 12.17334168 | 1 | 0.155484918 | 0.13853604 |
| GOTERM_BP_DIRECT | GO:0033574~response to testosterone | 3 | 2.127659574 | 0.024822293 | NQO1, MTAP, RPS6KB1 | 141 | 34 | 19453 | 12.17334168 | 1 | 0.155484918 | 0.13853604 |
| GOTERM_BP_DIRECT | GO:0007613~memory | 4 | 2.836879433 | 0.026441899 | CHRNA7, HTR2A, PTGS2, SLC6A4 | 141 | 89 | 19453 | 6.200653439 | 1 | 0.165229936 | 0.147218787 |
| GOTERM_BP_DIRECT | GO:2001235~positive regulation of apoptotic signaling pathway | 3 | 2.127659574 | 0.027617062 | CTSL, CTSS, TGFBR1 | 141 | 36 | 19453 | 11.49704492 | 1 | 0.171743604 | 0.153022422 |
| GOTERM_BP_DIRECT | GO:0001975~response to amphetamine | 3 | 2.127659574 | 0.027617062 | EDNRA, HPRT1, HDAC6 | 141 | 36 | 19453 | 11.49704492 | 1 | 0.171743604 | 0.153022422 |
| GOTERM_BP_DIRECT | GO:0030183~B cell differentiation | 4 | 2.836879433 | 0.027996719 | ADAM17, SYK, FLT3, KIT | 141 | 91 | 19453 | 6.064375341 | 1 | 0.173360822 | 0.154463354 |
| GOTERM_BP_DIRECT | GO:0043242~negative regulation of protein complex disassembly | 2 | 1.418439716 | 0.028480228 | TNF, HDAC6 | 141 | 4 | 19453 | 68.9822695 | 1 | 0.173360822 | 0.154463354 |
| GOTERM_BP_DIRECT | GO:1900086~positive regulation of peptidyl-tyrosine autophosphorylation | 2 | 1.418439716 | 0.028480228 | ACE, VEGFA | 141 | 4 | 19453 | 68.9822695 | 1 | 0.173360822 | 0.154463354 |
| GOTERM_BP_DIRECT | GO:2000546~positive regulation of endothelial cell chemotaxis to fibroblast growth factor | 2 | 1.418439716 | 0.028480228 | FGF2, FGFR1 | 141 | 4 | 19453 | 68.9822695 | 1 | 0.173360822 | 0.154463354 |
| GOTERM_BP_DIRECT | GO:0002366~leukocyte activation involved in immune response | 2 | 1.418439716 | 0.028480228 | SYK, IL2 | 141 | 4 | 19453 | 68.9822695 | 1 | 0.173360822 | 0.154463354 |
| GOTERM_BP_DIRECT | GO:0090170~regulation of Golgi inheritance | 2 | 1.418439716 | 0.028480228 | MAP2K1, MAPK1 | 141 | 4 | 19453 | 68.9822695 | 1 | 0.173360822 | 0.154463354 |
| GOTERM_BP_DIRECT | GO:0043201~response to leucine | 2 | 1.418439716 | 0.028480228 | RPS6KB1, PIK3CA | 141 | 4 | 19453 | 68.9822695 | 1 | 0.173360822 | 0.154463354 |
| GOTERM_BP_DIRECT | GO:0038127~ERBB signaling pathway | 2 | 1.418439716 | 0.028480228 | MAPK1, PTPN11 | 141 | 4 | 19453 | 68.9822695 | 1 | 0.173360822 | 0.154463354 |
| GOTERM_BP_DIRECT | GO:0032765~positive regulation of mast cell cytokine production | 2 | 1.418439716 | 0.028480228 | SYK, KIT | 141 | 4 | 19453 | 68.9822695 | 1 | 0.173360822 | 0.154463354 |
| GOTERM_BP_DIRECT | GO:0042220~response to cocaine | 3 | 2.127659574 | 0.029059751 | HSP90AA1, HSPA5, MDM2 | 141 | 37 | 19453 | 11.18631397 | 1 | 0.17564854 | 0.156501695 |
| GOTERM_BP_DIRECT | GO:0048536~spleen development | 3 | 2.127659574 | 0.029059751 | ADAM17, BCL2, ABL1 | 141 | 37 | 19453 | 11.18631397 | 1 | 0.17564854 | 0.156501695 |
| GOTERM_BP_DIRECT | GO:0000077~DNA damage checkpoint | 3 | 2.127659574 | 0.029059751 | CHEK1, PTPN11, MAPK14 | 141 | 37 | 19453 | 11.18631397 | 1 | 0.17564854 | 0.156501695 |
| GOTERM_BP_DIRECT | GO:0007596~blood coagulation | 4 | 2.836879433 | 0.029599284 | PLAU, ANXA5, PLAT, F2 | 141 | 93 | 19453 | 5.933958667 | 1 | 0.178492652 | 0.15903578 |
| GOTERM_BP_DIRECT | GO:0001890~placenta development | 3 | 2.127659574 | 0.030531976 | PPARG, MAPK14, PTK2 | 141 | 38 | 19453 | 10.89193729 | 1 | 0.183262693 | 0.163285855 |
| GOTERM_BP_DIRECT | GO:0048469~cell maturation | 3 | 2.127659574 | 0.030531976 | KDR, PPARG, VEGFA | 141 | 38 | 19453 | 10.89193729 | 1 | 0.183262693 | 0.163285855 |
| GOTERM_BP_DIRECT | GO:0006955~immune response | 9 | 6.382978723 | 0.031365975 | CTSL, CXCR3, CXCR2, CXCR4, TNF, CTSS, IL2, PIK3CG, IGF1R | 141 | 510 | 19453 | 2.434668335 | 1 | 0.187832816 | 0.167357805 |
| GOTERM_BP_DIRECT | GO:0007190~activation of adenylate cyclase activity | 3 | 2.127659574 | 0.032033243 | EDNRA, ADORA2B, RAF1 | 141 | 39 | 19453 | 10.61265685 | 1 | 0.190068806 | 0.169350057 |
| GOTERM_BP_DIRECT | GO:0007095~mitotic G2 DNA damage checkpoint | 3 | 2.127659574 | 0.032033243 | PLK1, CHEK1, CDK1 | 141 | 39 | 19453 | 10.61265685 | 1 | 0.190068806 | 0.169350057 |
| GOTERM_BP_DIRECT | GO:2000648~positive regulation of stem cell proliferation | 3 | 2.127659574 | 0.032033243 | TERT, KDR, FGF2 | 141 | 39 | 19453 | 10.61265685 | 1 | 0.190068806 | 0.169350057 |
| GOTERM_BP_DIRECT | GO:0010634~positive regulation of epithelial cell migration | 3 | 2.127659574 | 0.032033243 | SRC, PTK2, HDAC6 | 141 | 39 | 19453 | 10.61265685 | 1 | 0.190068806 | 0.169350057 |
| GOTERM_BP_DIRECT | GO:0051604~protein maturation | 3 | 2.127659574 | 0.033563065 | IKBKB, CASP7, CASP3 | 141 | 40 | 19453 | 10.34734043 | 1 | 0.198236642 | 0.176627545 |
| GOTERM_BP_DIRECT | GO:0043537~negative regulation of blood vessel endothelial cell migration | 3 | 2.127659574 | 0.033563065 | PPARG, TNF, FGF2 | 141 | 40 | 19453 | 10.34734043 | 1 | 0.198236642 | 0.176627545 |
| GOTERM_BP_DIRECT | GO:0006338~chromatin remodeling | 7 | 4.964539007 | 0.034838868 | HDAC1, CHEK1, CDK2, CDK1, TOP1, ESR1, AURKA | 141 | 336 | 19453 | 2.874261229 | 1 | 0.201867344 | 0.179862477 |
| GOTERM_BP_DIRECT | GO:0051591~response to cAMP | 3 | 2.127659574 | 0.03512096 | STAT1, BRAF, PLAT | 141 | 41 | 19453 | 10.09496627 | 1 | 0.201867344 | 0.179862477 |
| GOTERM_BP_DIRECT | GO:0048286~lung alveolus development | 3 | 2.127659574 | 0.03512096 | ACE, KDR, PGR | 141 | 41 | 19453 | 10.09496627 | 1 | 0.201867344 | 0.179862477 |
| GOTERM_BP_DIRECT | GO:0071902~positive regulation of protein serine/threonine kinase activity | 3 | 2.127659574 | 0.03512096 | MAP2K1, SRC, PIM1 | 141 | 41 | 19453 | 10.09496627 | 1 | 0.201867344 | 0.179862477 |
| GOTERM_BP_DIRECT | GO:0038033~positive regulation of endothelial cell chemotaxis by VEGF-activated vascular endothelial growth factor receptor signaling pathway | 2 | 1.418439716 | 0.035473532 | KDR, VEGFA | 141 | 5 | 19453 | 55.1858156 | 1 | 0.201867344 | 0.179862477 |
| GOTERM_BP_DIRECT | GO:0031622~positive regulation of fever generation | 2 | 1.418439716 | 0.035473532 | PTGS2, TNF | 141 | 5 | 19453 | 55.1858156 | 1 | 0.201867344 | 0.179862477 |
| GOTERM_BP_DIRECT | GO:0032310~prostaglandin secretion | 2 | 1.418439716 | 0.035473532 | NOS2, PTGS2 | 141 | 5 | 19453 | 55.1858156 | 1 | 0.201867344 | 0.179862477 |
| GOTERM_BP_DIRECT | GO:0045923~positive regulation of fatty acid metabolic process | 2 | 1.418439716 | 0.035473532 | PPARG, PPARA | 141 | 5 | 19453 | 55.1858156 | 1 | 0.201867344 | 0.179862477 |
| GOTERM_BP_DIRECT | GO:1905278~positive regulation of epithelial tube formation | 2 | 1.418439716 | 0.035473532 | FGF2, VEGFA | 141 | 5 | 19453 | 55.1858156 | 1 | 0.201867344 | 0.179862477 |
| GOTERM_BP_DIRECT | GO:0001554~luteolysis | 2 | 1.418439716 | 0.035473532 | HSPA5, CASP3 | 141 | 5 | 19453 | 55.1858156 | 1 | 0.201867344 | 0.179862477 |
| GOTERM_BP_DIRECT | GO:0035900~response to isolation stress | 2 | 1.418439716 | 0.035473532 | SOD2, TNF | 141 | 5 | 19453 | 55.1858156 | 1 | 0.201867344 | 0.179862477 |
| GOTERM_BP_DIRECT | GO:0061523~cilium disassembly | 2 | 1.418439716 | 0.035473532 | HDAC6, AURKA | 141 | 5 | 19453 | 55.1858156 | 1 | 0.201867344 | 0.179862477 |
| GOTERM_BP_DIRECT | GO:0009750~response to fructose | 2 | 1.418439716 | 0.035473532 | PTGS2, TNF | 141 | 5 | 19453 | 55.1858156 | 1 | 0.201867344 | 0.179862477 |
| GOTERM_BP_DIRECT | GO:0043243~positive regulation of protein complex disassembly | 2 | 1.418439716 | 0.035473532 | TNF, IGF1R | 141 | 5 | 19453 | 55.1858156 | 1 | 0.201867344 | 0.179862477 |
| GOTERM_BP_DIRECT | GO:0035509~negative regulation of myosin-light-chain-phosphatase activity | 2 | 1.418439716 | 0.035473532 | IKBKB, TNF | 141 | 5 | 19453 | 55.1858156 | 1 | 0.201867344 | 0.179862477 |
| GOTERM_BP_DIRECT | GO:0072734~cellular response to staurosporine | 2 | 1.418439716 | 0.035473532 | CASP7, CASP3 | 141 | 5 | 19453 | 55.1858156 | 1 | 0.201867344 | 0.179862477 |
| GOTERM_BP_DIRECT | GO:0090090~negative regulation of canonical Wnt signaling pathway | 5 | 3.546099291 | 0.035504307 | GSK3B, BMP2, HDAC1, IGFBP2, MAPK14 | 141 | 171 | 19453 | 4.034050848 | 1 | 0.201867344 | 0.179862477 |
| GOTERM_BP_DIRECT | GO:0030855~epithelial cell differentiation | 4 | 2.836879433 | 0.036483946 | CDK1, PPARG, CTSB, VEGFA | 141 | 101 | 19453 | 5.463942139 | 1 | 0.206883628 | 0.184331953 |
| GOTERM_BP_DIRECT | GO:1901796~regulation of signal transduction by p53 class mediator | 3 | 2.127659574 | 0.03670645 | CHEK1, AKT1, AURKA | 141 | 42 | 19453 | 9.854609929 | 1 | 0.206883628 | 0.184331953 |
| GOTERM_BP_DIRECT | GO:0050790~regulation of catalytic activity | 3 | 2.127659574 | 0.03670645 | PARP1, SOD2, CTSB | 141 | 42 | 19453 | 9.854609929 | 1 | 0.206883628 | 0.184331953 |
| GOTERM_BP_DIRECT | GO:0045184~establishment of protein localization | 3 | 2.127659574 | 0.03670645 | PLK1, MDM2, ABL1 | 141 | 42 | 19453 | 9.854609929 | 1 | 0.206883628 | 0.184331953 |
| GOTERM_BP_DIRECT | GO:0007595~lactation | 3 | 2.127659574 | 0.038319063 | CCND1, XDH, VEGFA | 141 | 43 | 19453 | 9.625432954 | 1 | 0.213206202 | 0.189965325 |
| GOTERM_BP_DIRECT | GO:0032728~positive regulation of interferon-beta production | 3 | 2.127659574 | 0.038319063 | HSP90AA1, TLR9, PTPN11 | 141 | 43 | 19453 | 9.625432954 | 1 | 0.213206202 | 0.189965325 |
| GOTERM_BP_DIRECT | GO:0043507~positive regulation of JUN kinase activity | 3 | 2.127659574 | 0.038319063 | SYK, TLR9, TNF | 141 | 43 | 19453 | 9.625432954 | 1 | 0.213206202 | 0.189965325 |
| GOTERM_BP_DIRECT | GO:0032870~cellular response to hormone stimulus | 3 | 2.127659574 | 0.038319063 | STAT3, IGFBP2, PGF | 141 | 43 | 19453 | 9.625432954 | 1 | 0.213206202 | 0.189965325 |
| GOTERM_BP_DIRECT | GO:0032733~positive regulation of interleukin-10 production | 3 | 2.127659574 | 0.038319063 | SYK, STAT3, TLR9 | 141 | 43 | 19453 | 9.625432954 | 1 | 0.213206202 | 0.189965325 |
| GOTERM_BP_DIRECT | GO:0000902~cell morphogenesis | 4 | 2.836879433 | 0.038322723 | YAP1, NOX4, MAPK14, EGFR | 141 | 103 | 19453 | 5.357846175 | 1 | 0.213206202 | 0.189965325 |
| GOTERM_BP_DIRECT | GO:0001658~branching involved in ureteric bud morphogenesis | 3 | 2.127659574 | 0.039958334 | BMP2, BCL2, FGF2 | 141 | 44 | 19453 | 9.406673114 | 1 | 0.22135377 | 0.197224755 |
| GOTERM_BP_DIRECT | GO:0009725~response to hormone | 3 | 2.127659574 | 0.039958334 | NQO1, NOS2, NOS3 | 141 | 44 | 19453 | 9.406673114 | 1 | 0.22135377 | 0.197224755 |
| GOTERM_BP_DIRECT | GO:0032735~positive regulation of interleukin-12 production | 3 | 2.127659574 | 0.041623801 | SYK, TLR9, MAPK14 | 141 | 45 | 19453 | 9.197635934 | 1 | 0.224861471 | 0.200350093 |
| GOTERM_BP_DIRECT | GO:0009755~hormone-mediated signaling pathway | 3 | 2.127659574 | 0.041623801 | PTPN11, PPARG, PPARA | 141 | 45 | 19453 | 9.197635934 | 1 | 0.224861471 | 0.200350093 |
| GOTERM_BP_DIRECT | GO:0048863~stem cell differentiation | 3 | 2.127659574 | 0.041623801 | KIT, MAPK14, ESR1 | 141 | 45 | 19453 | 9.197635934 | 1 | 0.224861471 | 0.200350093 |
| GOTERM_BP_DIRECT | GO:0030316~osteoclast differentiation | 3 | 2.127659574 | 0.041623801 | BMP2, MAPK14, TNF | 141 | 45 | 19453 | 9.197635934 | 1 | 0.224861471 | 0.200350093 |
| GOTERM_BP_DIRECT | GO:0007566~embryo implantation | 3 | 2.127659574 | 0.041623801 | MMP2, PTGS2, MMP9 | 141 | 45 | 19453 | 9.197635934 | 1 | 0.224861471 | 0.200350093 |
| GOTERM_BP_DIRECT | GO:1990962~drug transport across blood-brain barrier | 2 | 1.418439716 | 0.042416853 | ABCC1, ABCB1 | 141 | 6 | 19453 | 45.98817967 | 1 | 0.224861471 | 0.200350093 |
| GOTERM_BP_DIRECT | GO:0036324~vascular endothelial growth factor receptor-2 signaling pathway | 2 | 1.418439716 | 0.042416853 | KDR, VEGFA | 141 | 6 | 19453 | 45.98817967 | 1 | 0.224861471 | 0.200350093 |
| GOTERM_BP_DIRECT | GO:0046651~lymphocyte proliferation | 2 | 1.418439716 | 0.042416853 | FLT3, HPRT1 | 141 | 6 | 19453 | 45.98817967 | 1 | 0.224861471 | 0.200350093 |
| GOTERM_BP_DIRECT | GO:1901984~negative regulation of protein acetylation | 2 | 1.418439716 | 0.042416853 | GSK3B, HDAC6 | 141 | 6 | 19453 | 45.98817967 | 1 | 0.224861471 | 0.200350093 |
| GOTERM_BP_DIRECT | GO:1903038~negative regulation of leukocyte cell-cell adhesion | 2 | 1.418439716 | 0.042416853 | AKT1, PPARA | 141 | 6 | 19453 | 45.98817967 | 1 | 0.224861471 | 0.200350093 |
| GOTERM_BP_DIRECT | GO:0051222~positive regulation of protein transport | 2 | 1.418439716 | 0.042416853 | SRC, TNF | 141 | 6 | 19453 | 45.98817967 | 1 | 0.224861471 | 0.200350093 |
| GOTERM_BP_DIRECT | GO:0010891~negative regulation of sequestering of triglyceride | 2 | 1.418439716 | 0.042416853 | PPARG, PPARA | 141 | 6 | 19453 | 45.98817967 | 1 | 0.224861471 | 0.200350093 |
| GOTERM_BP_DIRECT | GO:0002320~lymphoid progenitor cell differentiation | 2 | 1.418439716 | 0.042416853 | KIT, BCL2 | 141 | 6 | 19453 | 45.98817967 | 1 | 0.224861471 | 0.200350093 |
| GOTERM_BP_DIRECT | GO:1903347~negative regulation of bicellular tight junction assembly | 2 | 1.418439716 | 0.042416853 | IKBKB, TNF | 141 | 6 | 19453 | 45.98817967 | 1 | 0.224861471 | 0.200350093 |
| GOTERM_BP_DIRECT | GO:0010632~regulation of epithelial cell migration | 2 | 1.418439716 | 0.042416853 | SRC, PTK2 | 141 | 6 | 19453 | 45.98817967 | 1 | 0.224861471 | 0.200350093 |
| GOTERM_BP_DIRECT | GO:0071312~cellular response to alkaloid | 2 | 1.418439716 | 0.042416853 | MDM2, TRPV1 | 141 | 6 | 19453 | 45.98817967 | 1 | 0.224861471 | 0.200350093 |
| GOTERM_BP_DIRECT | GO:0060129~thyroid-stimulating hormone-secreting cell differentiation | 2 | 1.418439716 | 0.042416853 | BMP2, FGF2 | 141 | 6 | 19453 | 45.98817967 | 1 | 0.224861471 | 0.200350093 |
| GOTERM_BP_DIRECT | GO:0014910~regulation of smooth muscle cell migration | 2 | 1.418439716 | 0.042416853 | ACE, PLAU | 141 | 6 | 19453 | 45.98817967 | 1 | 0.224861471 | 0.200350093 |
| GOTERM_BP_DIRECT | GO:0060754~positive regulation of mast cell chemotaxis | 2 | 1.418439716 | 0.042416853 | PGF, VEGFA | 141 | 6 | 19453 | 45.98817967 | 1 | 0.224861471 | 0.200350093 |
| GOTERM_BP_DIRECT | GO:0051902~negative regulation of mitochondrial depolarization | 2 | 1.418439716 | 0.042416853 | SRC, BCL2 | 141 | 6 | 19453 | 45.98817967 | 1 | 0.224861471 | 0.200350093 |
| GOTERM_BP_DIRECT | GO:0051712~positive regulation of killing of cells of other organism | 2 | 1.418439716 | 0.042416853 | SYK, NOS2 | 141 | 6 | 19453 | 45.98817967 | 1 | 0.224861471 | 0.200350093 |
| GOTERM_BP_DIRECT | GO:0002223~stimulatory C-type lectin receptor signaling pathway | 3 | 2.127659574 | 0.043315009 | IKBKB, SYK, SRC | 141 | 46 | 19453 | 8.997687327 | 1 | 0.226375611 | 0.201699182 |
| GOTERM_BP_DIRECT | GO:0042177~negative regulation of protein catabolic process | 3 | 2.127659574 | 0.043315009 | NQO1, NOS2, EGFR | 141 | 46 | 19453 | 8.997687327 | 1 | 0.226375611 | 0.201699182 |
| GOTERM_BP_DIRECT | GO:0042311~vasodilation | 3 | 2.127659574 | 0.043315009 | ADORA2B, NOS3, TNF | 141 | 46 | 19453 | 8.997687327 | 1 | 0.226375611 | 0.201699182 |
| GOTERM_BP_DIRECT | GO:0072089~stem cell proliferation | 3 | 2.127659574 | 0.043315009 | ABCB1, KDR, FGF2 | 141 | 46 | 19453 | 8.997687327 | 1 | 0.226375611 | 0.201699182 |
| GOTERM_BP_DIRECT | GO:0009411~response to UV | 3 | 2.127659574 | 0.043315009 | CASP7, MAPK8, CASP3 | 141 | 46 | 19453 | 8.997687327 | 1 | 0.226375611 | 0.201699182 |
| GOTERM_BP_DIRECT | GO:0043407~negative regulation of MAP kinase activity | 3 | 2.127659574 | 0.043315009 | BMP2, GSTP1, PPARG | 141 | 46 | 19453 | 8.997687327 | 1 | 0.226375611 | 0.201699182 |
| GOTERM_BP_DIRECT | GO:0050796~regulation of insulin secretion | 3 | 2.127659574 | 0.043315009 | NOS2, ALOX5, TNF | 141 | 46 | 19453 | 8.997687327 | 1 | 0.226375611 | 0.201699182 |
| GOTERM_BP_DIRECT | GO:0097009~energy homeostasis | 3 | 2.127659574 | 0.046772845 | ALK, PIK3CA, STAT3 | 141 | 48 | 19453 | 8.622783688 | 1 | 0.243463482 | 0.216924363 |
| GOTERM_BP_DIRECT | GO:0021762~substantia nigra development | 3 | 2.127659574 | 0.046772845 | LDHA, HSPA5, FGF2 | 141 | 48 | 19453 | 8.622783688 | 1 | 0.243463482 | 0.216924363 |
| GOTERM_BP_DIRECT | GO:0006749~glutathione metabolic process | 3 | 2.127659574 | 0.048538588 | GSTP1, GSR, SOD2 | 141 | 49 | 19453 | 8.446808511 | 1 | 0.245792641 | 0.218999628 |
| GOTERM_BP_DIRECT | GO:0010862~positive regulation of pathway-restricted SMAD protein phosphorylation | 3 | 2.127659574 | 0.048538588 | BMP2, PPARG, TGFBR1 | 141 | 49 | 19453 | 8.446808511 | 1 | 0.245792641 | 0.218999628 |
| GOTERM_BP_DIRECT | GO:0061684~chaperone-mediated autophagy | 2 | 1.418439716 | 0.049310545 | HSPA8, HSP90AA1 | 141 | 7 | 19453 | 39.41843972 | 1 | 0.245792641 | 0.218999628 |
| GOTERM_BP_DIRECT | GO:0038001~paracrine signaling | 2 | 1.418439716 | 0.049310545 | PGR, FGF2 | 141 | 7 | 19453 | 39.41843972 | 1 | 0.245792641 | 0.218999628 |
| GOTERM_BP_DIRECT | GO:0070200~establishment of protein localization to telomere | 2 | 1.418439716 | 0.049310545 | TERT, POT1 | 141 | 7 | 19453 | 39.41843972 | 1 | 0.245792641 | 0.218999628 |
| GOTERM_BP_DIRECT | GO:0051173~positive regulation of nitrogen compound metabolic process | 2 | 1.418439716 | 0.049310545 | TNF, TGFBR1 | 141 | 7 | 19453 | 39.41843972 | 1 | 0.245792641 | 0.218999628 |
| GOTERM_BP_DIRECT | GO:1901300~positive regulation of hydrogen peroxide-mediated programmed cell death | 2 | 1.418439716 | 0.049310545 | ABL1, HDAC6 | 141 | 7 | 19453 | 39.41843972 | 1 | 0.245792641 | 0.218999628 |
| GOTERM_BP_DIRECT | GO:1903721~positive regulation of I-kappaB phosphorylation | 2 | 1.418439716 | 0.049310545 | AKT1, TNF | 141 | 7 | 19453 | 39.41843972 | 1 | 0.245792641 | 0.218999628 |
| GOTERM_BP_DIRECT | GO:0048864~stem cell development | 2 | 1.418439716 | 0.049310545 | BCL2, FGF2 | 141 | 7 | 19453 | 39.41843972 | 1 | 0.245792641 | 0.218999628 |
| GOTERM_BP_DIRECT | GO:1902462~positive regulation of mesenchymal stem cell proliferation | 2 | 1.418439716 | 0.049310545 | CCNE1, TGFBR1 | 141 | 7 | 19453 | 39.41843972 | 1 | 0.245792641 | 0.218999628 |
| GOTERM_BP_DIRECT | GO:1905144~response to acetylcholine | 2 | 1.418439716 | 0.049310545 | EDNRA, CHRNA7 | 141 | 7 | 19453 | 39.41843972 | 1 | 0.245792641 | 0.218999628 |
| GOTERM_BP_DIRECT | GO:0046321~positive regulation of fatty acid oxidation | 2 | 1.418439716 | 0.049310545 | PPARG, PPARA | 141 | 7 | 19453 | 39.41843972 | 1 | 0.245792641 | 0.218999628 |
| GOTERM_BP_DIRECT | GO:0003015~heart process | 2 | 1.418439716 | 0.049310545 | YAP1, NOX4 | 141 | 7 | 19453 | 39.41843972 | 1 | 0.245792641 | 0.218999628 |
| GOTERM_BP_DIRECT | GO:0060440~trachea formation | 2 | 1.418439716 | 0.049310545 | MAP2K1, MAPK1 | 141 | 7 | 19453 | 39.41843972 | 1 | 0.245792641 | 0.218999628 |
| GOTERM_BP_DIRECT | GO:0048584~positive regulation of response to stimulus | 2 | 1.418439716 | 0.049310545 | FLT3, KIT | 141 | 7 | 19453 | 39.41843972 | 1 | 0.245792641 | 0.218999628 |
| GOTERM_BP_DIRECT | GO:0051239~regulation of multicellular organismal process | 2 | 1.418439716 | 0.049310545 | PTK2, TGFBR1 | 141 | 7 | 19453 | 39.41843972 | 1 | 0.245792641 | 0.218999628 |
| GOTERM_BP_DIRECT | GO:0043457~regulation of cellular respiration | 2 | 1.418439716 | 0.049310545 | PIK3CA, NOS2 | 141 | 7 | 19453 | 39.41843972 | 1 | 0.245792641 | 0.218999628 |
| GOTERM_BP_DIRECT | GO:0022898~regulation of transmembrane transporter activity | 2 | 1.418439716 | 0.049310545 | BCL2, PIM1 | 141 | 7 | 19453 | 39.41843972 | 1 | 0.245792641 | 0.218999628 |
| GOTERM_BP_DIRECT | GO:0044321~response to leptin | 2 | 1.418439716 | 0.049310545 | CCND1, STAT3 | 141 | 7 | 19453 | 39.41843972 | 1 | 0.245792641 | 0.218999628 |
| GOTERM_BP_DIRECT | GO:0038113~interleukin-9-mediated signaling pathway | 2 | 1.418439716 | 0.049310545 | STAT1, STAT3 | 141 | 7 | 19453 | 39.41843972 | 1 | 0.245792641 | 0.218999628 |
| GOTERM_BP_DIRECT | GO:0006166~purine ribonucleoside salvage | 2 | 1.418439716 | 0.049310545 | MTAP, HPRT1 | 141 | 7 | 19453 | 39.41843972 | 1 | 0.245792641 | 0.218999628 |
| GOTERM_BP_DIRECT | GO:1903944~negative regulation of hepatocyte apoptotic process | 2 | 1.418439716 | 0.049310545 | PPARA, IGF1R | 141 | 7 | 19453 | 39.41843972 | 1 | 0.245792641 | 0.218999628 |
| GOTERM_BP_DIRECT | GO:0043280~positive regulation of cysteine-type endopeptidase activity involved in apoptotic process | 3 | 2.127659574 | 0.053977898 | SYK, DAPK1, TNF | 141 | 52 | 19453 | 7.959492635 | 1 | 0.268540043 | 0.239267413 |
| GOTERM_BP_DIRECT | GO:0051496~positive regulation of stress fiber assembly | 3 | 2.127659574 | 0.055836942 | ABL1, BRAF, TGFBR1 | 141 | 53 | 19453 | 7.809313529 | 1 | 0.269023864 | 0.239698495 |
| GOTERM_BP_DIRECT | GO:0061044~negative regulation of vascular wound healing | 2 | 1.418439716 | 0.056154962 | ALOX5, TNF | 141 | 8 | 19453 | 34.49113475 | 1 | 0.269023864 | 0.239698495 |
| GOTERM_BP_DIRECT | GO:0010518~positive regulation of phospholipase activity | 2 | 1.418439716 | 0.056154962 | PDPK1, FGFR1 | 141 | 8 | 19453 | 34.49113475 | 1 | 0.269023864 | 0.239698495 |
| GOTERM_BP_DIRECT | GO:0060336~negative regulation of interferon-gamma-mediated signaling pathway | 2 | 1.418439716 | 0.056154962 | ARG1, PPARG | 141 | 8 | 19453 | 34.49113475 | 1 | 0.269023864 | 0.239698495 |
| GOTERM_BP_DIRECT | GO:2000270~negative regulation of fibroblast apoptotic process | 2 | 1.418439716 | 0.056154962 | PIK3CA, PIK3CG | 141 | 8 | 19453 | 34.49113475 | 1 | 0.269023864 | 0.239698495 |
| GOTERM_BP_DIRECT | GO:0010757~negative regulation of plasminogen activation | 2 | 1.418439716 | 0.056154962 | PLAU, PLAT | 141 | 8 | 19453 | 34.49113475 | 1 | 0.269023864 | 0.239698495 |
| GOTERM_BP_DIRECT | GO:0040016~embryonic cleavage | 2 | 1.418439716 | 0.056154962 | TOP2A, TOP1 | 141 | 8 | 19453 | 34.49113475 | 1 | 0.269023864 | 0.239698495 |
| GOTERM_BP_DIRECT | GO:0048762~mesenchymal cell differentiation | 2 | 1.418439716 | 0.056154962 | BMP2, TGFBR1 | 141 | 8 | 19453 | 34.49113475 | 1 | 0.269023864 | 0.239698495 |
| GOTERM_BP_DIRECT | GO:0010742~macrophage derived foam cell differentiation | 2 | 1.418439716 | 0.056154962 | STAT1, PPARG | 141 | 8 | 19453 | 34.49113475 | 1 | 0.269023864 | 0.239698495 |
| GOTERM_BP_DIRECT | GO:0007172~signal complex assembly | 2 | 1.418439716 | 0.056154962 | SRC, PTK2 | 141 | 8 | 19453 | 34.49113475 | 1 | 0.269023864 | 0.239698495 |
| GOTERM_BP_DIRECT | GO:0002674~negative regulation of acute inflammatory response | 2 | 1.418439716 | 0.056154962 | GSTP1, PPARG | 141 | 8 | 19453 | 34.49113475 | 1 | 0.269023864 | 0.239698495 |
| GOTERM_BP_DIRECT | GO:0006975~DNA damage induced protein phosphorylation | 2 | 1.418439716 | 0.056154962 | CHEK1, ABL1 | 141 | 8 | 19453 | 34.49113475 | 1 | 0.269023864 | 0.239698495 |
| GOTERM_BP_DIRECT | GO:0050798~activated T cell proliferation | 2 | 1.418439716 | 0.056154962 | ABL1, IL2 | 141 | 8 | 19453 | 34.49113475 | 1 | 0.269023864 | 0.239698495 |
| GOTERM_BP_DIRECT | GO:0034405~response to fluid shear stress | 2 | 1.418439716 | 0.056154962 | NOS3, AKT1 | 141 | 8 | 19453 | 34.49113475 | 1 | 0.269023864 | 0.239698495 |
| GOTERM_BP_DIRECT | GO:0010760~negative regulation of macrophage chemotaxis | 2 | 1.418439716 | 0.056154962 | MIF, CYP19A1 | 141 | 8 | 19453 | 34.49113475 | 1 | 0.269023864 | 0.239698495 |
| GOTERM_BP_DIRECT | GO:1904045~cellular response to aldosterone | 2 | 1.418439716 | 0.056154962 | ACE, IGF1R | 141 | 8 | 19453 | 34.49113475 | 1 | 0.269023864 | 0.239698495 |
| GOTERM_BP_DIRECT | GO:0010544~negative regulation of platelet activation | 2 | 1.418439716 | 0.056154962 | NOS3, F2 | 141 | 8 | 19453 | 34.49113475 | 1 | 0.269023864 | 0.239698495 |
| GOTERM_BP_DIRECT | GO:0032741~positive regulation of interleukin-18 production | 2 | 1.418439716 | 0.056154962 | TLR9, TNF | 141 | 8 | 19453 | 34.49113475 | 1 | 0.269023864 | 0.239698495 |
| GOTERM_BP_DIRECT | GO:0038110~interleukin-2-mediated signaling pathway | 2 | 1.418439716 | 0.056154962 | STAT3, IL2 | 141 | 8 | 19453 | 34.49113475 | 1 | 0.269023864 | 0.239698495 |
| GOTERM_BP_DIRECT | GO:0043567~regulation of insulin-like growth factor receptor signaling pathway | 2 | 1.418439716 | 0.056154962 | IGFBP3, IGFBP2 | 141 | 8 | 19453 | 34.49113475 | 1 | 0.269023864 | 0.239698495 |
| GOTERM_BP_DIRECT | GO:0051209~release of sequestered calcium ion into cytosol | 3 | 2.127659574 | 0.057718259 | TRPV1, HTR2A, FGF2 | 141 | 54 | 19453 | 7.664696612 | 1 | 0.276002099 | 0.245916056 |
| GOTERM_BP_DIRECT | GO:0006260~DNA replication | 4 | 2.836879433 | 0.058068286 | CHEK1, CDK2, CDK1, TOP1 | 141 | 122 | 19453 | 4.523427508 | 1 | 0.277163571 | 0.24695092 |
| GOTERM_BP_DIRECT | GO:0030282~bone mineralization | 3 | 2.127659574 | 0.059621436 | BMP2, MMP13, PTGS2 | 141 | 55 | 19453 | 7.525338491 | 1 | 0.283530616 | 0.252623916 |
| GOTERM_BP_DIRECT | GO:0010718~positive regulation of epithelial to mesenchymal transition | 3 | 2.127659574 | 0.059621436 | BMP2, PTK2, TGFBR1 | 141 | 55 | 19453 | 7.525338491 | 1 | 0.283530616 | 0.252623916 |
| GOTERM_BP_DIRECT | GO:0043123~positive regulation of I-kappaB kinase/NF-kappaB signaling | 5 | 3.546099291 | 0.06092321 | IKBKB, PARP1, ABL1, TLR9, TNF | 141 | 205 | 19453 | 3.364988756 | 1 | 0.289189623 | 0.257666053 |
| GOTERM_BP_DIRECT | GO:2000300~regulation of synaptic vesicle exocytosis | 3 | 2.127659574 | 0.061546067 | GSK3B, ADORA2B, HTR2A | 141 | 56 | 19453 | 7.390957447 | 1 | 0.289259004 | 0.257727872 |
| GOTERM_BP_DIRECT | GO:0030308~negative regulation of cell growth | 4 | 2.836879433 | 0.062732688 | BCL2, PPARG, ESR2, HSPA1A | 141 | 126 | 19453 | 4.379826635 | 1 | 0.289259004 | 0.257727872 |
| GOTERM_BP_DIRECT | GO:0051901~positive regulation of mitochondrial depolarization | 2 | 1.418439716 | 0.062950452 | PARP1, KDR | 141 | 9 | 19453 | 30.65878645 | 1 | 0.289259004 | 0.257727872 |
| GOTERM_BP_DIRECT | GO:0043267~negative regulation of potassium ion transport | 2 | 1.418439716 | 0.062950452 | NOS3, HTR2A | 141 | 9 | 19453 | 30.65878645 | 1 | 0.289259004 | 0.257727872 |
| GOTERM_BP_DIRECT | GO:0010888~negative regulation of lipid storage | 2 | 1.418439716 | 0.062950452 | PPARG, TNF | 141 | 9 | 19453 | 30.65878645 | 1 | 0.289259004 | 0.257727872 |
| GOTERM_BP_DIRECT | GO:1990314~cellular response to insulin-like growth factor stimulus | 2 | 1.418439716 | 0.062950452 | CCNA2, IGF1R | 141 | 9 | 19453 | 30.65878645 | 1 | 0.289259004 | 0.257727872 |
| GOTERM_BP_DIRECT | GO:2001259~positive regulation of cation channel activity | 2 | 1.418439716 | 0.062950452 | EDNRA, CTSS | 141 | 9 | 19453 | 30.65878645 | 1 | 0.289259004 | 0.257727872 |
| GOTERM_BP_DIRECT | GO:0044320~cellular response to leptin stimulus | 2 | 1.418439716 | 0.062950452 | CCNA2, STAT3 | 141 | 9 | 19453 | 30.65878645 | 1 | 0.289259004 | 0.257727872 |
| GOTERM_BP_DIRECT | GO:1903140~regulation of establishment of endothelial barrier | 2 | 1.418439716 | 0.062950452 | IKBKB, TNF | 141 | 9 | 19453 | 30.65878645 | 1 | 0.289259004 | 0.257727872 |
| GOTERM_BP_DIRECT | GO:0008354~germ cell migration | 2 | 1.418439716 | 0.062950452 | KIT, TGFBR1 | 141 | 9 | 19453 | 30.65878645 | 1 | 0.289259004 | 0.257727872 |
| GOTERM_BP_DIRECT | GO:0006265~DNA topological change | 2 | 1.418439716 | 0.062950452 | TOP2A, TOP1 | 141 | 9 | 19453 | 30.65878645 | 1 | 0.289259004 | 0.257727872 |
| GOTERM_BP_DIRECT | GO:0060982~coronary artery morphogenesis | 2 | 1.418439716 | 0.062950452 | TGFBR1, VEGFA | 141 | 9 | 19453 | 30.65878645 | 1 | 0.289259004 | 0.257727872 |
| GOTERM_BP_DIRECT | GO:0061042~vascular wound healing | 2 | 1.418439716 | 0.062950452 | KDR, VEGFA | 141 | 9 | 19453 | 30.65878645 | 1 | 0.289259004 | 0.257727872 |
| GOTERM_BP_DIRECT | GO:0035095~behavioral response to nicotine | 2 | 1.418439716 | 0.062950452 | CHRNA7, PPARA | 141 | 9 | 19453 | 30.65878645 | 1 | 0.289259004 | 0.257727872 |
| GOTERM_BP_DIRECT | GO:0010907~positive regulation of glucose metabolic process | 2 | 1.418439716 | 0.062950452 | SRC, AKT1 | 141 | 9 | 19453 | 30.65878645 | 1 | 0.289259004 | 0.257727872 |
| GOTERM_BP_DIRECT | GO:0051128~regulation of cellular component organization | 2 | 1.418439716 | 0.062950452 | GSK3B, PTK2 | 141 | 9 | 19453 | 30.65878645 | 1 | 0.289259004 | 0.257727872 |
| GOTERM_BP_DIRECT | GO:0051122~hepoxilin biosynthetic process | 2 | 1.418439716 | 0.062950452 | ALOX5, GSTP1 | 141 | 9 | 19453 | 30.65878645 | 1 | 0.289259004 | 0.257727872 |
| GOTERM_BP_DIRECT | GO:0035726~common myeloid progenitor cell proliferation | 2 | 1.418439716 | 0.062950452 | FLT3, GSTP1 | 141 | 9 | 19453 | 30.65878645 | 1 | 0.289259004 | 0.257727872 |
| GOTERM_BP_DIRECT | GO:0006986~response to unfolded protein | 3 | 2.127659574 | 0.06349175 | HSPA8, HSP90AA1, HSPA1A | 141 | 57 | 19453 | 7.261291527 | 1 | 0.290199924 | 0.258566225 |
| GOTERM_BP_DIRECT | GO:0022900~electron transport chain | 3 | 2.127659574 | 0.06349175 | GSR, NOX4, CYP19A1 | 141 | 57 | 19453 | 7.261291527 | 1 | 0.290199924 | 0.258566225 |
| GOTERM_BP_DIRECT | GO:0016241~regulation of macroautophagy | 3 | 2.127659574 | 0.06349175 | MAPK8, CASP3, HDAC6 | 141 | 57 | 19453 | 7.261291527 | 1 | 0.290199924 | 0.258566225 |
| GOTERM_BP_DIRECT | GO:1901215~negative regulation of neuron death | 3 | 2.127659574 | 0.065458086 | GSK3B, AKT1, PPARA | 141 | 58 | 19453 | 7.136096845 | 1 | 0.298659735 | 0.266103861 |
| GOTERM_BP_DIRECT | GO:0034446~substrate adhesion-dependent cell spreading | 3 | 2.127659574 | 0.069451153 | SRC, ABL1, BRAF | 141 | 60 | 19453 | 6.89822695 | 1 | 0.309274576 | 0.275561615 |
| GOTERM_BP_DIRECT | GO:0051289~protein homotetramerization | 3 | 2.127659574 | 0.069451153 | TRPV1, HPRT1, SOD2 | 141 | 60 | 19453 | 6.89822695 | 1 | 0.309274576 | 0.275561615 |
| GOTERM_BP_DIRECT | GO:0033033~negative regulation of myeloid cell apoptotic process | 2 | 1.418439716 | 0.069697363 | BCL2, MIF | 141 | 10 | 19453 | 27.5929078 | 1 | 0.309274576 | 0.275561615 |
| GOTERM_BP_DIRECT | GO:0033598~mammary gland epithelial cell proliferation | 2 | 1.418439716 | 0.069697363 | CCND1, MAPK1 | 141 | 10 | 19453 | 27.5929078 | 1 | 0.309274576 | 0.275561615 |
| GOTERM_BP_DIRECT | GO:0070633~transepithelial transport | 2 | 1.418439716 | 0.069697363 | ABCC1, ABCB1 | 141 | 10 | 19453 | 27.5929078 | 1 | 0.309274576 | 0.275561615 |
| GOTERM_BP_DIRECT | GO:0010952~positive regulation of peptidase activity | 2 | 1.418439716 | 0.069697363 | CTSL, CTSS | 141 | 10 | 19453 | 27.5929078 | 1 | 0.309274576 | 0.275561615 |
| GOTERM_BP_DIRECT | GO:0033762~response to glucagon | 2 | 1.418439716 | 0.069697363 | CCNA2, RPS6KB1 | 141 | 10 | 19453 | 27.5929078 | 1 | 0.309274576 | 0.275561615 |
| GOTERM_BP_DIRECT | GO:0001945~lymph vessel development | 2 | 1.418439716 | 0.069697363 | SYK, KDR | 141 | 10 | 19453 | 27.5929078 | 1 | 0.309274576 | 0.275561615 |
| GOTERM_BP_DIRECT | GO:0051093~negative regulation of developmental process | 2 | 1.418439716 | 0.069697363 | GSK3B, KIT | 141 | 10 | 19453 | 27.5929078 | 1 | 0.309274576 | 0.275561615 |
| GOTERM_BP_DIRECT | GO:0033629~negative regulation of cell adhesion mediated by integrin | 2 | 1.418439716 | 0.069697363 | CYP1B1, PTPN11 | 141 | 10 | 19453 | 27.5929078 | 1 | 0.309274576 | 0.275561615 |
| GOTERM_BP_DIRECT | GO:0046825~regulation of protein export from nucleus | 2 | 1.418439716 | 0.069697363 | GSK3B, PTPN11 | 141 | 10 | 19453 | 27.5929078 | 1 | 0.309274576 | 0.275561615 |
| GOTERM_BP_DIRECT | GO:0035360~positive regulation of peroxisome proliferator activated receptor signaling pathway | 2 | 1.418439716 | 0.069697363 | BMP2, FABP5 | 141 | 10 | 19453 | 27.5929078 | 1 | 0.309274576 | 0.275561615 |
| GOTERM_BP_DIRECT | GO:0002070~epithelial cell maturation | 2 | 1.418439716 | 0.069697363 | KDR, PGR | 141 | 10 | 19453 | 27.5929078 | 1 | 0.309274576 | 0.275561615 |
| GOTERM_BP_DIRECT | GO:0050764~regulation of phagocytosis | 2 | 1.418439716 | 0.069697363 | HCK, SYK | 141 | 10 | 19453 | 27.5929078 | 1 | 0.309274576 | 0.275561615 |
| GOTERM_BP_DIRECT | GO:0060576~intestinal epithelial cell development | 2 | 1.418439716 | 0.069697363 | YAP1, SRC | 141 | 10 | 19453 | 27.5929078 | 1 | 0.309274576 | 0.275561615 |
| GOTERM_BP_DIRECT | GO:0044346~fibroblast apoptotic process | 2 | 1.418439716 | 0.069697363 | CASP7, CASP3 | 141 | 10 | 19453 | 27.5929078 | 1 | 0.309274576 | 0.275561615 |
| GOTERM_BP_DIRECT | GO:0090263~positive regulation of canonical Wnt signaling pathway | 4 | 2.836879433 | 0.071094559 | YAP1, SRC, FGF2, EGFR | 141 | 133 | 19453 | 4.149309444 | 1 | 0.314934289 | 0.280604382 |
| GOTERM_BP_DIRECT | GO:0034644~cellular response to UV | 3 | 2.127659574 | 0.071477111 | PARP1, PTGS2, CDC25A | 141 | 61 | 19453 | 6.785141263 | 1 | 0.315548268 | 0.281151433 |
| GOTERM_BP_DIRECT | GO:0071363~cellular response to growth factor stimulus | 3 | 2.127659574 | 0.071477111 | RPS6KB1, MDM2, TGFBR1 | 141 | 61 | 19453 | 6.785141263 | 1 | 0.315548268 | 0.281151433 |
| GOTERM_BP_DIRECT | GO:0001701~in utero embryonic development | 5 | 3.546099291 | 0.071855292 | EDNRA, BMP2, NOS3, TGFBR1, VEGFA | 141 | 217 | 19453 | 3.178906429 | 1 | 0.316677412 | 0.282157493 |
| GOTERM_BP_DIRECT | GO:0001570~vasculogenesis | 3 | 2.127659574 | 0.075585975 | YAP1, KDR, VEGFA | 141 | 63 | 19453 | 6.569739953 | 1 | 0.327886194 | 0.292144444 |
| GOTERM_BP_DIRECT | GO:0010764~negative regulation of fibroblast migration | 2 | 1.418439716 | 0.07639604 | BRAF, FGF2 | 141 | 11 | 19453 | 25.08446164 | 1 | 0.327886194 | 0.292144444 |
| GOTERM_BP_DIRECT | GO:0010459~negative regulation of heart rate | 2 | 1.418439716 | 0.07639604 | TRPV1, TNF | 141 | 11 | 19453 | 25.08446164 | 1 | 0.327886194 | 0.292144444 |
| GOTERM_BP_DIRECT | GO:0048771~tissue remodeling | 2 | 1.418439716 | 0.07639604 | MMP14, MMP2 | 141 | 11 | 19453 | 25.08446164 | 1 | 0.327886194 | 0.292144444 |
| GOTERM_BP_DIRECT | GO:0071803~positive regulation of podosome assembly | 2 | 1.418439716 | 0.07639604 | SRC, TNF | 141 | 11 | 19453 | 25.08446164 | 1 | 0.327886194 | 0.292144444 |
| GOTERM_BP_DIRECT | GO:0072577~endothelial cell apoptotic process | 2 | 1.418439716 | 0.07639604 | BRAF, TNF | 141 | 11 | 19453 | 25.08446164 | 1 | 0.327886194 | 0.292144444 |
| GOTERM_BP_DIRECT | GO:0002446~neutrophil mediated immunity | 2 | 1.418439716 | 0.07639604 | ADAM17, ACE | 141 | 11 | 19453 | 25.08446164 | 1 | 0.327886194 | 0.292144444 |
| GOTERM_BP_DIRECT | GO:0043306~positive regulation of mast cell degranulation | 2 | 1.418439716 | 0.07639604 | SYK, ADORA2B | 141 | 11 | 19453 | 25.08446164 | 1 | 0.327886194 | 0.292144444 |
| GOTERM_BP_DIRECT | GO:0009651~response to salt stress | 2 | 1.418439716 | 0.07639604 | HSP90AA1, TNF | 141 | 11 | 19453 | 25.08446164 | 1 | 0.327886194 | 0.292144444 |
| GOTERM_BP_DIRECT | GO:1902065~response to L-glutamate | 2 | 1.418439716 | 0.07639604 | TNF, IGF1R | 141 | 11 | 19453 | 25.08446164 | 1 | 0.327886194 | 0.292144444 |
| GOTERM_BP_DIRECT | GO:0031639~plasminogen activation | 2 | 1.418439716 | 0.07639604 | PLAU, PLAT | 141 | 11 | 19453 | 25.08446164 | 1 | 0.327886194 | 0.292144444 |
| GOTERM_BP_DIRECT | GO:0010887~negative regulation of cholesterol storage | 2 | 1.418439716 | 0.07639604 | PPARG, PPARA | 141 | 11 | 19453 | 25.08446164 | 1 | 0.327886194 | 0.292144444 |
| GOTERM_BP_DIRECT | GO:0001759~organ induction | 2 | 1.418439716 | 0.07639604 | FGF1, FGF2 | 141 | 11 | 19453 | 25.08446164 | 1 | 0.327886194 | 0.292144444 |
| GOTERM_BP_DIRECT | GO:0019370~leukotriene biosynthetic process | 2 | 1.418439716 | 0.07639604 | SYK, ALOX5 | 141 | 11 | 19453 | 25.08446164 | 1 | 0.327886194 | 0.292144444 |
| GOTERM_BP_DIRECT | GO:0043279~response to alkaloid | 2 | 1.418439716 | 0.07639604 | NQO1, IGF1R | 141 | 11 | 19453 | 25.08446164 | 1 | 0.327886194 | 0.292144444 |
| GOTERM_BP_DIRECT | GO:0050853~B cell receptor signaling pathway | 4 | 2.836879433 | 0.076426507 | SYK, BCL2, ABL1, MAPK1 | 141 | 137 | 19453 | 4.028161723 | 1 | 0.327886194 | 0.292144444 |
| GOTERM_BP_DIRECT | GO:0071230~cellular response to amino acid stimulus | 3 | 2.127659574 | 0.077668135 | MMP2, TNF, EGFR | 141 | 64 | 19453 | 6.467087766 | 1 | 0.332111514 | 0.295909177 |
| GOTERM_BP_DIRECT | GO:0006959~humoral immune response | 3 | 2.127659574 | 0.077668135 | ALOX5, BCL2, TNF | 141 | 64 | 19453 | 6.467087766 | 1 | 0.332111514 | 0.295909177 |
| GOTERM_BP_DIRECT | GO:0014070~response to organic cyclic compound | 3 | 2.127659574 | 0.08188608 | MMP14, CDK1, PPARA | 141 | 66 | 19453 | 6.271115409 | 1 | 0.343747415 | 0.306276688 |
| GOTERM_BP_DIRECT | GO:2000343~positive regulation of chemokine (C-X-C motif) ligand 2 production | 2 | 1.418439716 | 0.083046824 | MIF, TNF | 141 | 12 | 19453 | 22.99408983 | 1 | 0.343747415 | 0.306276688 |
| GOTERM_BP_DIRECT | GO:0050927~positive regulation of positive chemotaxis | 2 | 1.418439716 | 0.083046824 | KDR, VEGFA | 141 | 12 | 19453 | 22.99408983 | 1 | 0.343747415 | 0.306276688 |
| GOTERM_BP_DIRECT | GO:1905461~positive regulation of vascular associated smooth muscle cell apoptotic process | 2 | 1.418439716 | 0.083046824 | PPARG, SOD2 | 141 | 12 | 19453 | 22.99408983 | 1 | 0.343747415 | 0.306276688 |
| GOTERM_BP_DIRECT | GO:0016572~histone phosphorylation | 2 | 1.418439716 | 0.083046824 | CCNA2, CDK2 | 141 | 12 | 19453 | 22.99408983 | 1 | 0.343747415 | 0.306276688 |
| GOTERM_BP_DIRECT | GO:0043276~anoikis | 2 | 1.418439716 | 0.083046824 | PIK3CA, AKT1 | 141 | 12 | 19453 | 22.99408983 | 1 | 0.343747415 | 0.306276688 |
| GOTERM_BP_DIRECT | GO:2001020~regulation of response to DNA damage stimulus | 2 | 1.418439716 | 0.083046824 | ABL1, MCL1 | 141 | 12 | 19453 | 22.99408983 | 1 | 0.343747415 | 0.306276688 |
| GOTERM_BP_DIRECT | GO:0014824~artery smooth muscle contraction | 2 | 1.418439716 | 0.083046824 | EDNRA, HTR2A | 141 | 12 | 19453 | 22.99408983 | 1 | 0.343747415 | 0.306276688 |
| GOTERM_BP_DIRECT | GO:0002903~negative regulation of B cell apoptotic process | 2 | 1.418439716 | 0.083046824 | BCL2, IL2 | 141 | 12 | 19453 | 22.99408983 | 1 | 0.343747415 | 0.306276688 |
| GOTERM_BP_DIRECT | GO:1903800~positive regulation of production of miRNAs involved in gene silencing by miRNA | 2 | 1.418439716 | 0.083046824 | MAP2K1, EGFR | 141 | 12 | 19453 | 22.99408983 | 1 | 0.343747415 | 0.306276688 |
| GOTERM_BP_DIRECT | GO:0071806~protein transmembrane transport | 2 | 1.418439716 | 0.083046824 | EDNRA, MCL1 | 141 | 12 | 19453 | 22.99408983 | 1 | 0.343747415 | 0.306276688 |
| GOTERM_BP_DIRECT | GO:0010226~response to lithium ion | 2 | 1.418439716 | 0.083046824 | IGFBP2, PTGS2 | 141 | 12 | 19453 | 22.99408983 | 1 | 0.343747415 | 0.306276688 |
| GOTERM_BP_DIRECT | GO:0003181~atrioventricular valve morphogenesis | 2 | 1.418439716 | 0.083046824 | BMP2, MDM2 | 141 | 12 | 19453 | 22.99408983 | 1 | 0.343747415 | 0.306276688 |
| GOTERM_BP_DIRECT | GO:0097011~cellular response to granulocyte macrophage colony-stimulating factor stimulus | 2 | 1.418439716 | 0.083046824 | MAPK1, AKT1 | 141 | 12 | 19453 | 22.99408983 | 1 | 0.343747415 | 0.306276688 |
| GOTERM_BP_DIRECT | GO:0048668~collateral sprouting | 2 | 1.418439716 | 0.083046824 | ABL1, HDAC6 | 141 | 12 | 19453 | 22.99408983 | 1 | 0.343747415 | 0.306276688 |
| GOTERM_BP_DIRECT | GO:0006983~ER overload response | 2 | 1.418439716 | 0.083046824 | GSK3B, HSPA5 | 141 | 12 | 19453 | 22.99408983 | 1 | 0.343747415 | 0.306276688 |
| GOTERM_BP_DIRECT | GO:0051926~negative regulation of calcium ion transport | 2 | 1.418439716 | 0.083046824 | NOS3, PTGS2 | 141 | 12 | 19453 | 22.99408983 | 1 | 0.343747415 | 0.306276688 |
| GOTERM_BP_DIRECT | GO:2000273~positive regulation of receptor activity | 2 | 1.418439716 | 0.083046824 | HDAC1, HDAC6 | 141 | 12 | 19453 | 22.99408983 | 1 | 0.343747415 | 0.306276688 |
| GOTERM_BP_DIRECT | GO:2000347~positive regulation of hepatocyte proliferation | 2 | 1.418439716 | 0.083046824 | FGF1, TNF | 141 | 12 | 19453 | 22.99408983 | 1 | 0.343747415 | 0.306276688 |
| GOTERM_BP_DIRECT | GO:0071679~commissural neuron axon guidance | 2 | 1.418439716 | 0.083046824 | ADAM17, VEGFA | 141 | 12 | 19453 | 22.99408983 | 1 | 0.343747415 | 0.306276688 |
| GOTERM_BP_DIRECT | GO:0045668~negative regulation of osteoblast differentiation | 3 | 2.127659574 | 0.084021143 | CDK6, PPARG, TNF | 141 | 67 | 19453 | 6.177516672 | 1 | 0.346670969 | 0.308881556 |
| GOTERM_BP_DIRECT | GO:0030216~keratinocyte differentiation | 3 | 2.127659574 | 0.084021143 | YAP1, MAP2K1, CASP3 | 141 | 67 | 19453 | 6.177516672 | 1 | 0.346670969 | 0.308881556 |
| GOTERM_BP_DIRECT | GO:0006469~negative regulation of protein kinase activity | 3 | 2.127659574 | 0.086173127 | PDPK1, GSTP1, AKT1 | 141 | 68 | 19453 | 6.086670839 | 1 | 0.354983886 | 0.31628831 |
| GOTERM_BP_DIRECT | GO:0030097~hemopoiesis | 3 | 2.127659574 | 0.088341682 | FLT3, KIT, SOD2 | 141 | 69 | 19453 | 5.998458218 | 1 | 0.358461664 | 0.319386987 |
| GOTERM_BP_DIRECT | GO:0007267~cell-cell signaling | 5 | 3.546099291 | 0.088932475 | BMP2, PGR, ESR2, IL2, PGF | 141 | 234 | 19453 | 2.947960235 | 1 | 0.358461664 | 0.319386987 |
| GOTERM_BP_DIRECT | GO:0043117~positive regulation of vascular permeability | 2 | 1.418439716 | 0.089650057 | CXCR2, VEGFA | 141 | 13 | 19453 | 21.22531369 | 1 | 0.358461664 | 0.319386987 |
| GOTERM_BP_DIRECT | GO:0033148~positive regulation of intracellular estrogen receptor signaling pathway | 2 | 1.418439716 | 0.089650057 | YAP1, PARP1 | 141 | 13 | 19453 | 21.22531369 | 1 | 0.358461664 | 0.319386987 |
| GOTERM_BP_DIRECT | GO:0014912~negative regulation of smooth muscle cell migration | 2 | 1.418439716 | 0.089650057 | APEX1, IGFBP3 | 141 | 13 | 19453 | 21.22531369 | 1 | 0.358461664 | 0.319386987 |
| GOTERM_BP_DIRECT | GO:0048680~positive regulation of axon regeneration | 2 | 1.418439716 | 0.089650057 | BRAF, IGF1R | 141 | 13 | 19453 | 21.22531369 | 1 | 0.358461664 | 0.319386987 |
| GOTERM_BP_DIRECT | GO:1903238~positive regulation of leukocyte tethering or rolling | 2 | 1.418439716 | 0.089650057 | SELP, SELE | 141 | 13 | 19453 | 21.22531369 | 1 | 0.358461664 | 0.319386987 |
| GOTERM_BP_DIRECT | GO:0048598~embryonic morphogenesis | 2 | 1.418439716 | 0.089650057 | FLT1, FGF2 | 141 | 13 | 19453 | 21.22531369 | 1 | 0.358461664 | 0.319386987 |
| GOTERM_BP_DIRECT | GO:0010269~response to selenium ion | 2 | 1.418439716 | 0.089650057 | ARG1, SOD2 | 141 | 13 | 19453 | 21.22531369 | 1 | 0.358461664 | 0.319386987 |
| GOTERM_BP_DIRECT | GO:0045056~transcytosis | 2 | 1.418439716 | 0.089650057 | SRC, IGF1R | 141 | 13 | 19453 | 21.22531369 | 1 | 0.358461664 | 0.319386987 |
| GOTERM_BP_DIRECT | GO:0034138~toll-like receptor 3 signaling pathway | 2 | 1.418439716 | 0.089650057 | IKBKB, TNF | 141 | 13 | 19453 | 21.22531369 | 1 | 0.358461664 | 0.319386987 |
| GOTERM_BP_DIRECT | GO:0032026~response to magnesium ion | 2 | 1.418439716 | 0.089650057 | CCND1, MDM2 | 141 | 13 | 19453 | 21.22531369 | 1 | 0.358461664 | 0.319386987 |
| GOTERM_BP_DIRECT | GO:0033993~response to lipid | 2 | 1.418439716 | 0.089650057 | PPARG, PPARA | 141 | 13 | 19453 | 21.22531369 | 1 | 0.358461664 | 0.319386987 |
| GOTERM_BP_DIRECT | GO:0071248~cellular response to metal ion | 2 | 1.418439716 | 0.089650057 | NQO1, TLR9 | 141 | 13 | 19453 | 21.22531369 | 1 | 0.358461664 | 0.319386987 |
| GOTERM_BP_DIRECT | GO:0060396~growth hormone receptor signaling pathway | 2 | 1.418439716 | 0.089650057 | STAT3, PTK2 | 141 | 13 | 19453 | 21.22531369 | 1 | 0.358461664 | 0.319386987 |
| GOTERM_BP_DIRECT | GO:0071372~cellular response to follicle-stimulating hormone stimulus | 2 | 1.418439716 | 0.089650057 | EDNRA, PLAT | 141 | 13 | 19453 | 21.22531369 | 1 | 0.358461664 | 0.319386987 |
| GOTERM_BP_DIRECT | GO:0002064~epithelial cell development | 2 | 1.418439716 | 0.089650057 | CXCR4, ESR1 | 141 | 13 | 19453 | 21.22531369 | 1 | 0.358461664 | 0.319386987 |
| GOTERM_BP_DIRECT | GO:0045793~positive regulation of cell size | 2 | 1.418439716 | 0.089650057 | RET, HSP90AA1 | 141 | 13 | 19453 | 21.22531369 | 1 | 0.358461664 | 0.319386987 |
| GOTERM_BP_DIRECT | GO:0051450~myoblast proliferation | 2 | 1.418439716 | 0.089650057 | SRC, ABL1 | 141 | 13 | 19453 | 21.22531369 | 1 | 0.358461664 | 0.319386987 |
| GOTERM_BP_DIRECT | GO:0032922~circadian regulation of gene expression | 3 | 2.127659574 | 0.092727125 | HDAC1, TOP1, PPARA | 141 | 71 | 19453 | 5.829487564 | 1 | 0.369622606 | 0.329331313 |
| GOTERM_BP_DIRECT | GO:0032715~negative regulation of interleukin-6 production | 3 | 2.127659574 | 0.092727125 | CHRNA7, TLR9, TNF | 141 | 71 | 19453 | 5.829487564 | 1 | 0.369622606 | 0.329331313 |
| GOTERM_BP_DIRECT | GO:0010447~response to acidic pH | 2 | 1.418439716 | 0.096206075 | SRC, CTSS | 141 | 14 | 19453 | 19.70921986 | 1 | 0.37709866 | 0.335992428 |
| GOTERM_BP_DIRECT | GO:0045820~negative regulation of glycolytic process | 2 | 1.418439716 | 0.096206075 | STAT3, PPARA | 141 | 14 | 19453 | 19.70921986 | 1 | 0.37709866 | 0.335992428 |
| GOTERM_BP_DIRECT | GO:0031571~mitotic G1 DNA damage checkpoint | 2 | 1.418439716 | 0.096206075 | CCND1, CDK2 | 141 | 14 | 19453 | 19.70921986 | 1 | 0.37709866 | 0.335992428 |
| GOTERM_BP_DIRECT | GO:0010954~positive regulation of protein processing | 2 | 1.418439716 | 0.096206075 | MMP14, SRC | 141 | 14 | 19453 | 19.70921986 | 1 | 0.37709866 | 0.335992428 |
| GOTERM_BP_DIRECT | GO:0048546~digestive tract morphogenesis | 2 | 1.418439716 | 0.096206075 | BCL2, EGFR | 141 | 14 | 19453 | 19.70921986 | 1 | 0.37709866 | 0.335992428 |
| GOTERM_BP_DIRECT | GO:0003323~type B pancreatic cell development | 2 | 1.418439716 | 0.096206075 | CDK6, PDPK1 | 141 | 14 | 19453 | 19.70921986 | 1 | 0.37709866 | 0.335992428 |
| GOTERM_BP_DIRECT | GO:0010745~negative regulation of macrophage derived foam cell differentiation | 2 | 1.418439716 | 0.096206075 | PPARG, PPARA | 141 | 14 | 19453 | 19.70921986 | 1 | 0.37709866 | 0.335992428 |
| GOTERM_BP_DIRECT | GO:0060644~mammary gland epithelial cell differentiation | 2 | 1.418439716 | 0.096206075 | AKT1, FGF2 | 141 | 14 | 19453 | 19.70921986 | 1 | 0.37709866 | 0.335992428 |
| GOTERM_BP_DIRECT | GO:0060317~cardiac epithelial to mesenchymal transition | 2 | 1.418439716 | 0.096206075 | BMP2, TGFBR1 | 141 | 14 | 19453 | 19.70921986 | 1 | 0.37709866 | 0.335992428 |
| GOTERM_BP_DIRECT | GO:0061029~eyelid development in camera-type eye | 2 | 1.418439716 | 0.096206075 | HDAC1, EGFR | 141 | 14 | 19453 | 19.70921986 | 1 | 0.37709866 | 0.335992428 |
| GOTERM_BP_DIRECT | GO:0045580~regulation of T cell differentiation | 2 | 1.418439716 | 0.096206075 | ABL1, BRAF | 141 | 14 | 19453 | 19.70921986 | 1 | 0.37709866 | 0.335992428 |
| GOTERM_BP_DIRECT | GO:0006366~transcription from RNA polymerase II promoter | 5 | 3.546099291 | 0.096485841 | BMP2, PARP1, MAPK14, FGF2, IL2 | 141 | 241 | 19453 | 2.862334834 | 1 | 0.377623104 | 0.336459704 |
| GOTERM_BP_DIRECT | GO:0000278~mitotic cell cycle | 4 | 2.836879433 | 0.099948856 | EDNRA, PLK1, ABL1, AURKA | 141 | 154 | 19453 | 3.58349452 | 1 | 0.390585635 | 0.348009235 |

**Supplementary Table 4** The 152 KEGG pathways.

| **Category** | **Term** | **Count** | **%** | **PValue** | **Genes** | **List Total** | **Pop Hits** | **Pop Total** | **Fold Enrichment** | **Bonferroni** | **Benjamini** | **FDR** |
| --- | --- | --- | --- | --- | --- | --- | --- | --- | --- | --- | --- | --- |
| KEGG_PATHWAY | hsa05200:Pathways in cancer | 59 | 41.84397163 | 9.09E-36 | RET, ALK, GSK3B, FLT3, FGF1, FGF2, IGF1R, IKBKB, CCND3, CASP7, EDNRA, CCND1, CASP3, PIM1, AKT1, MAP2K1, HSP90AA1, DAPK1, MMP1, MMP2, F2, MMP9, TGFBR1, PGF, CCNA2, PIK3CA, CCNE1, KIT, PPARG, RAF1, MET, HDAC1, GSTP1, CXCR4, PTGS2, EGFR, MAPK8, TERT, ABL1, MAPK1, NQO1, NOS2, STAT1, STAT3, BRAF, ESR1, ESR2, IL2, PTK2, VEGFA, MAPK10, BMP2, CDK6, RPS6KB1, CDK4, CDK2, BCL2, MDM2, FGFR1 | 134 | 531 | 8644 | 7.167495854 | 2.21E-33 | 2.21E-33 | 9.63E-34 |
| KEGG_PATHWAY | hsa05215:Prostate cancer | 23 | 16.31205674 | 2.78E-20 | GSK3B, MAP2K1, HSP90AA1, PDPK1, GSTP1, MMP3, BRAF, PLAT, MMP9, EGFR, IGF1R, IKBKB, PIK3CA, CCND1, CCNE1, PLAU, CDK2, MDM2, BCL2, AKT1, MAPK1, RAF1, FGFR1 | 134 | 97 | 8644 | 15.29558394 | 6.75E-18 | 2.58E-18 | 1.13E-18 |
| KEGG_PATHWAY | hsa04151:PI3K-Akt signaling pathway | 37 | 26.24113475 | 3.19E-20 | RET, GSK3B, FLT1, FLT3, FGF1, FGF2, EGFR, PIK3CG, IGF1R, IKBKB, CCND3, CCND1, KDR, AKT1, MAPK1, MCL1, MAP2K1, HSP90AA1, SYK, NOS3, PDPK1, IL2, PGF, PTK2, VEGFA, CDK6, PIK3CA, RPS6KB1, CCNE1, CDK4, KIT, CDK2, BCL2, MDM2, RAF1, MET, FGFR1 | 134 | 359 | 8644 | 6.648401447 | 7.74E-18 | 2.58E-18 | 1.13E-18 |
| KEGG_PATHWAY | hsa05205:Proteoglycans in cancer | 29 | 20.56737589 | 2.41E-19 | SRC, FGF2, TNF, EGFR, IGF1R, CCND1, PLAU, CTSL, CASP3, KDR, AKT1, MAPK1, MAP2K1, PDPK1, MMP2, STAT3, PTPN11, BRAF, MAPK14, MMP9, ESR1, PTK2, VEGFA, PIK3CA, RPS6KB1, MDM2, RAF1, MET, FGFR1 | 134 | 205 | 8644 | 9.125445941 | 5.87E-17 | 1.47E-17 | 6.40E-18 |
| KEGG_PATHWAY | hsa01522:Endocrine resistance | 22 | 15.60283688 | 7.61E-19 | MAP2K1, SRC, MMP2, BRAF, MAPK14, ESR1, MMP9, EGFR, PTK2, ESR2, IGF1R, MAPK10, MAPK8, PIK3CA, CCND1, RPS6KB1, CDK4, MDM2, BCL2, AKT1, MAPK1, RAF1 | 134 | 98 | 8644 | 14.48126713 | 1.85E-16 | 3.70E-17 | 1.61E-17 |
| KEGG_PATHWAY | hsa05417:Lipid and atherosclerosis | 28 | 19.85815603 | 1.04E-17 | GSK3B, SRC, TNF, IKBKB, CASP7, MAPK8, CASP3, AKT1, MAPK1, HSPA8, HSP90AA1, HSPA5, MMP1, NOS3, PDPK1, MMP3, STAT3, MAPK14, SOD2, SELE, MMP9, PTK2, SELP, MAPK10, PIK3CA, BCL2, PPARG, HSPA1A | 134 | 215 | 8644 | 8.400971885 | 2.52E-15 | 4.21E-16 | 1.83E-16 |
| KEGG_PATHWAY | hsa04933:AGE-RAGE signaling pathway in diabetic complications | 20 | 14.18439716 | 4.26E-16 | NOS3, STAT1, MMP2, STAT3, MAPK14, SELE, TNF, TGFBR1, VEGFA, MAPK10, MAPK8, PIK3CA, CCND1, CDK4, CASP3, PIM1, BCL2, NOX4, AKT1, MAPK1 | 134 | 100 | 8644 | 12.90149254 | 1.08E-13 | 1.48E-14 | 6.45E-15 |
| KEGG_PATHWAY | hsa05219:Bladder cancer | 15 | 10.63829787 | 5.02E-16 | MAP2K1, DAPK1, MMP1, SRC, MMP2, BRAF, MMP9, EGFR, TYMP, VEGFA, CCND1, CDK4, MDM2, MAPK1, RAF1 | 134 | 41 | 8644 | 23.60029123 | 1.35E-13 | 1.52E-14 | 6.65E-15 |
| KEGG_PATHWAY | hsa05212:Pancreatic cancer | 18 | 12.76595745 | 9.09E-16 | MAP2K1, STAT1, STAT3, BRAF, EGFR, TGFBR1, VEGFA, MAPK10, IKBKB, MAPK8, CDK6, PIK3CA, CCND1, RPS6KB1, CDK4, AKT1, MAPK1, RAF1 | 134 | 76 | 8644 | 15.27808327 | 2.16E-13 | 2.46E-14 | 1.07E-14 |
| KEGG_PATHWAY | hsa05162:Measles | 21 | 14.89361702 | 1.72E-14 | HSPA8, GSK3B, STAT1, STAT3, IL2, MAPK10, IKBKB, CCND3, MAPK8, CDK6, PIK3CA, CCND1, CCNE1, CDK4, CASP3, CDK2, BCL2, TLR9, AKT1, HSPA1A, TP73 | 134 | 138 | 8644 | 9.816353018 | 4.18E-12 | 4.19E-13 | 1.83E-13 |
| KEGG_PATHWAY | hsa05418:Fluid shear stress and atherosclerosis | 21 | 14.89361702 | 1.99E-14 | NQO1, HSP90AA1, NOS3, SRC, GSTP1, MMP2, PLAT, MAPK14, SELE, TNF, MMP9, PTK2, VEGFA, MAPK10, IKBKB, MAPK8, PIK3CA, CTSL, KDR, BCL2, AKT1 | 134 | 139 | 8644 | 9.745731773 | 4.83E-12 | 4.39E-13 | 1.92E-13 |
| KEGG_PATHWAY | hsa01521:EGFR tyrosine kinase inhibitor resistance | 17 | 12.05673759 | 3.75E-14 | GSK3B, MAP2K1, SRC, STAT3, BRAF, FGF2, EGFR, IGF1R, VEGFA, PIK3CA, RPS6KB1, KDR, BCL2, AKT1, MAPK1, RAF1, MET | 134 | 79 | 8644 | 13.88135273 | 9.09E-12 | 7.58E-13 | 3.31E-13 |
| KEGG_PATHWAY | hsa04068:FoxO signaling pathway | 20 | 14.18439716 | 8.09E-14 | MAP2K1, PDPK1, PLK1, STAT3, BRAF, MAPK14, SOD2, EGFR, TGFBR1, IGF1R, MAPK10, IKBKB, MAPK8, PIK3CA, CCND1, CDK2, MDM2, AKT1, MAPK1, RAF1 | 134 | 131 | 8644 | 9.848467586 | 1.97E-11 | 1.51E-12 | 6.60E-13 |
| KEGG_PATHWAY | hsa05167:Kaposi sarcoma-associated herpesvirus infection | 23 | 16.31205674 | 1.38E-13 | GSK3B, MAP2K1, SYK, STAT1, SRC, STAT3, PTGS2, MAPK14, FGF2, PIK3CG, VEGFA, MAPK10, IKBKB, HCK, MAPK8, CDK6, PIK3CA, CCND1, CDK4, CASP3, AKT1, MAPK1, RAF1 | 134 | 194 | 8644 | 7.647791968 | 3.36E-11 | 2.40E-12 | 1.05E-12 |
| KEGG_PATHWAY | hsa05223:Non-small cell lung cancer | 16 | 11.34751773 | 1.58E-13 | ALK, RET, MAP2K1, PDPK1, STAT3, BRAF, FHIT, EGFR, CDK6, PIK3CA, CCND1, CDK4, AKT1, MAPK1, RAF1, MET | 134 | 72 | 8644 | 14.33499171 | 3.84E-11 | 2.40E-12 | 1.05E-12 |
| KEGG_PATHWAY | hsa05218:Melanoma | 16 | 11.34751773 | 1.58E-13 | MAP2K1, BRAF, FGF1, FGF2, EGFR, IGF1R, CDK6, PIK3CA, CCND1, CDK4, MDM2, AKT1, MAPK1, RAF1, MET, FGFR1 | 134 | 72 | 8644 | 14.33499171 | 3.84E-11 | 2.40E-12 | 1.05E-12 |
| KEGG_PATHWAY | hsa04914:Progesterone-mediated oocyte maturation | 18 | 12.76595745 | 1.71E-13 | MAP2K1, HSP90AA1, PLK1, BRAF, MAPK14, CDC25A, AURKA, IGF1R, MAPK10, CCNA2, MAPK8, PIK3CA, CDK2, CDK1, AKT1, MAPK1, PGR, RAF1 | 134 | 102 | 8644 | 11.38366989 | 4.16E-11 | 2.45E-12 | 1.07E-12 |
| KEGG_PATHWAY | hsa05161:Hepatitis B | 21 | 14.89361702 | 3.92E-13 | MAP2K1, STAT1, SRC, STAT3, BRAF, MAPK14, TNF, MMP9, TGFBR1, MAPK10, CCNA2, IKBKB, MAPK8, PIK3CA, CCNE1, CASP3, CDK2, BCL2, AKT1, MAPK1, RAF1 | 134 | 162 | 8644 | 8.362078496 | 9.53E-11 | 5.29E-12 | 2.31E-12 |
| KEGG_PATHWAY | hsa04010:MAPK signaling pathway | 27 | 19.14893617 | 4.41E-13 | RET, FLT1, FLT3, FGF1, FGF2, TNF, EGFR, IGF1R, IKBKB, MAPK8, CASP3, KDR, AKT1, MAPK1, HSPA8, MAP2K1, BRAF, MAPK14, TGFBR1, PGF, VEGFA, MAPK10, KIT, RAF1, MET, FGFR1, HSPA1A | 134 | 301 | 8644 | 5.786383696 | 1.07E-10 | 5.64E-12 | 2.46E-12 |
| KEGG_PATHWAY | hsa05224:Breast cancer | 20 | 14.18439716 | 6.89E-13 | GSK3B, MAP2K1, BRAF, FGF1, FGF2, ESR1, EGFR, ESR2, IGF1R, CDK6, PIK3CA, CCND1, RPS6KB1, CDK4, KIT, AKT1, MAPK1, PGR, RAF1, FGFR1 | 134 | 147 | 8644 | 8.776525536 | 1.67E-10 | 8.37E-12 | 3.65E-12 |
| Top 20 | | | | | | | | | | | | |
| KEGG_PATHWAY | hsa04917:Prolactin signaling pathway | 15 | 10.63829787 | 1.94E-12 | GSK3B, MAP2K1, STAT1, SRC, STAT3, MAPK14, ESR1, ESR2, MAPK10, MAPK8, PIK3CA, CCND1, AKT1, MAPK1, RAF1 | 134 | 70 | 8644 | 13.82302772 | 4.71E-10 | 2.24E-11 | 9.78E-12 |
| KEGG_PATHWAY | hsa05163:Human cytomegalovirus infection | 23 | 16.31205674 | 2.91E-12 | GSK3B, MAP2K1, SRC, STAT3, CXCR4, PTGS2, MAPK14, TNF, EGFR, PTK2, VEGFA, IKBKB, CDK6, PIK3CA, CCND1, RPS6KB1, CDK4, CASP3, CXCR2, MDM2, AKT1, MAPK1, RAF1 | 134 | 225 | 8644 | 6.594096186 | 7.08E-10 | 3.22E-11 | 1.40E-11 |
| KEGG_PATHWAY | hsa04510:Focal adhesion | 22 | 15.60283688 | 3.21E-12 | GSK3B, MAP2K1, FLT1, PDPK1, SRC, BRAF, EGFR, PGF, PTK2, IGF1R, VEGFA, MAPK10, CCND3, MAPK8, PIK3CA, CCND1, KDR, BCL2, AKT1, MAPK1, RAF1, MET | 134 | 203 | 8644 | 6.990956547 | 7.80E-10 | 3.39E-11 | 1.48E-11 |
| KEGG_PATHWAY | hsa05206:MicroRNAs in cancer | 26 | 18.43971631 | 6.15E-12 | ABCB1, HDAC1, PTGS2, EGFR, IKBKB, CCND1, PLAU, CASP3, ABL1, PIM1, CYP1B1, MAPK1, MCL1, ABCC1, MAP2K1, STAT3, MMP9, CDC25A, VEGFA, CDK6, PIK3CA, CCNE1, BCL2, MDM2, RAF1, MET | 134 | 310 | 8644 | 5.410303322 | 1.49E-09 | 6.20E-11 | 2.70E-11 |
| KEGG_PATHWAY | hsa05220:Chronic myeloid leukemia | 15 | 10.63829787 | 6.38E-12 | MAP2K1, HDAC1, BRAF, PTPN11, TGFBR1, IKBKB, CDK6, PIK3CA, CCND1, CDK4, MDM2, ABL1, AKT1, MAPK1, RAF1 | 134 | 76 | 8644 | 12.73173606 | 1.55E-09 | 6.20E-11 | 2.70E-11 |
| KEGG_PATHWAY | hsa05207:Chemical carcinogenesis - receptor activation | 22 | 15.60283688 | 7.47E-12 | MAP2K1, HSP90AA1, SRC, CHRNA7, STAT3, FGF2, ESR1, CDC25A, EGFR, ESR2, VEGFA, CCND3, PIK3CA, CCND1, RPS6KB1, BCL2, CYP1B1, AKT1, MAPK1, PGR, RAF1, PPARA | 134 | 212 | 8644 | 6.694170656 | 1.82E-09 | 6.98E-11 | 3.05E-11 |
| KEGG_PATHWAY | hsa04926:Relaxin signaling pathway | 18 | 12.76595745 | 8.93E-12 | MAP2K1, NOS2, NOS3, MMP1, SRC, MMP2, MAPK14, MMP9, EGFR, TGFBR1, VEGFA, MAPK10, MAPK8, MMP13, PIK3CA, AKT1, MAPK1, RAF1 | 134 | 129 | 8644 | 9.001041305 | 2.17E-09 | 7.87E-11 | 3.43E-11 |
| KEGG_PATHWAY | hsa05145:Toxoplasmosis | 17 | 12.05673759 | 9.38E-12 | HSPA8, NOS2, PDPK1, STAT1, STAT3, MAPK14, TNF, PIK3CG, MAPK10, IKBKB, MAPK8, CASP3, ALOX5, BCL2, AKT1, MAPK1, HSPA1A | 134 | 111 | 8644 | 9.879521312 | 2.28E-09 | 7.87E-11 | 3.43E-11 |
| KEGG_PATHWAY | hsa05226:Gastric cancer | 19 | 13.4751773 | 9.40E-12 | GSK3B, MAP2K1, ABCB1, BRAF, FGF1, FGF2, EGFR, TGFBR1, TERT, PIK3CA, CCND1, RPS6KB1, CCNE1, CDK2, BCL2, AKT1, MAPK1, RAF1, MET | 134 | 149 | 8644 | 8.225783833 | 2.28E-09 | 7.87E-11 | 3.43E-11 |
| KEGG_PATHWAY | hsa05221:Acute myeloid leukemia | 14 | 9.929078014 | 1.87E-11 | MAP2K1, FLT3, STAT3, BRAF, CCNA2, IKBKB, PIK3CA, CCND1, RPS6KB1, KIT, PIM1, AKT1, MAPK1, RAF1 | 134 | 67 | 8644 | 13.47917131 | 4.56E-09 | 1.52E-10 | 6.62E-11 |
| KEGG_PATHWAY | hsa05208:Chemical carcinogenesis - reactive oxygen species | 22 | 15.60283688 | 1.98E-11 | NQO1, MAP2K1, PDPK1, SRC, BRAF, PTPN11, MAPK14, SOD2, EGFR, PTK2, VEGFA, MAPK10, IKBKB, MAPK8, PIK3CA, ABL1, CYP1B1, NOX4, AKT1, MAPK1, RAF1, MET | 134 | 223 | 8644 | 6.363964929 | 4.81E-09 | 1.55E-10 | 6.77E-11 |
| KEGG_PATHWAY | hsa04218:Cellular senescence | 19 | 13.4751773 | 2.06E-11 | MAP2K1, IGFBP3, MAPK14, CDC25A, TGFBR1, CCNA2, CCND3, CDK6, PIK3CA, CCND1, CCNE1, CDK4, CHEK1, CDK2, MDM2, CDK1, AKT1, MAPK1, RAF1 | 134 | 156 | 8644 | 7.856678148 | 5.01E-09 | 1.56E-10 | 6.83E-11 |
| KEGG_PATHWAY | hsa04210:Apoptosis | 18 | 12.76595745 | 2.13E-11 | MAP2K1, PARP1, PDPK1, TNF, CTSS, MAPK10, IKBKB, CASP7, MAPK8, PIK3CA, CTSL, CASP3, BCL2, AKT1, MAPK1, RAF1, CTSB, MCL1 | 134 | 136 | 8644 | 8.537752414 | 5.16E-09 | 1.56E-10 | 6.83E-11 |
| KEGG_PATHWAY | hsa05169:Epstein-Barr virus infection | 21 | 14.89361702 | 2.50E-11 | SYK, STAT1, HDAC1, STAT3, MAPK14, TNF, MAPK10, CCNA2, IKBKB, CCND3, MAPK8, CDK6, PIK3CA, CCND1, CCNE1, CDK4, CASP3, CDK2, MDM2, BCL2, AKT1 | 134 | 202 | 8644 | 6.706221368 | 6.07E-09 | 1.79E-10 | 7.79E-11 |
| KEGG_PATHWAY | hsa05210:Colorectal cancer | 15 | 10.63829787 | 3.70E-11 | GSK3B, MAP2K1, BRAF, EGFR, TGFBR1, MAPK10, MAPK8, PIK3CA, CCND1, RPS6KB1, CASP3, BCL2, AKT1, MAPK1, RAF1 | 134 | 86 | 8644 | 11.25130163 | 8.98E-09 | 2.57E-10 | 1.12E-10 |
| KEGG_PATHWAY | hsa04625:C-type lectin receptor signaling pathway | 16 | 11.34751773 | 4.31E-11 | SYK, STAT1, SRC, PTPN11, PTGS2, MAPK14, TNF, IL2, MAPK10, IKBKB, MAPK8, PIK3CA, MDM2, AKT1, MAPK1, RAF1 | 134 | 104 | 8644 | 9.924225029 | 1.05E-08 | 2.91E-10 | 1.27E-10 |
| KEGG_PATHWAY | hsa04014:Ras signaling pathway | 22 | 15.60283688 | 5.83E-11 | MAP2K1, FLT1, FLT3, PTPN11, FGF1, FGF2, EGFR, PGF, IGF1R, VEGFA, MAPK10, IKBKB, MAPK8, PIK3CA, KIT, KDR, ABL1, AKT1, MAPK1, RAF1, MET, FGFR1 | 134 | 236 | 8644 | 6.013407539 | 1.42E-08 | 3.83E-10 | 1.67E-10 |
| KEGG_PATHWAY | hsa05165:Human papillomavirus infection | 25 | 17.73049645 | 1.61E-10 | GSK3B, HDAC1, PTGS2, TNF, EGFR, IKBKB, CCND3, CCND1, TERT, CASP3, AKT1, MAPK1, MAP2K1, STAT1, PTK2, VEGFA, CCNA2, CDK6, PIK3CA, RPS6KB1, CCNE1, CDK4, CDK2, MDM2, RAF1 | 134 | 331 | 8644 | 4.872164855 | 3.91E-08 | 1.03E-09 | 4.49E-10 |
| KEGG_PATHWAY | hsa04668:TNF signaling pathway | 16 | 11.34751773 | 1.66E-10 | MAP2K1, MMP3, PTGS2, MAPK14, SELE, TNF, MMP9, MAPK10, IKBKB, MMP14, CASP7, MAPK8, PIK3CA, CASP3, AKT1, MAPK1 | 134 | 114 | 8644 | 9.053678974 | 4.02E-08 | 1.03E-09 | 4.50E-10 |
| KEGG_PATHWAY | hsa05160:Hepatitis C | 18 | 12.76595745 | 2.38E-10 | GSK3B, MAP2K1, STAT1, STAT3, BRAF, TNF, EGFR, IKBKB, CDK6, PIK3CA, CCND1, CDK4, CASP3, CDK2, AKT1, MAPK1, RAF1, PPARA | 134 | 158 | 8644 | 7.348951445 | 5.78E-08 | 1.44E-09 | 6.29E-10 |
| KEGG_PATHWAY | hsa04915:Estrogen signaling pathway | 17 | 12.05673759 | 2.43E-10 | HSPA8, MAP2K1, HSP90AA1, NOS3, SRC, MMP2, ESR1, MMP9, EGFR, ESR2, PIK3CA, BCL2, AKT1, MAPK1, PGR, RAF1, HSPA1A | 134 | 137 | 8644 | 8.004575662 | 5.91E-08 | 1.44E-09 | 6.29E-10 |
| KEGG_PATHWAY | hsa04722:Neurotrophin signaling pathway | 16 | 11.34751773 | 3.08E-10 | GSK3B, MAP2K1, PDPK1, BRAF, PTPN11, MAPK14, MAPK10, IKBKB, MAPK8, PIK3CA, BCL2, ABL1, AKT1, MAPK1, RAF1, TP73 | 134 | 119 | 8644 | 8.673272294 | 7.49E-08 | 1.78E-09 | 7.78E-10 |
| KEGG_PATHWAY | hsa04015:Rap1 signaling pathway | 20 | 14.18439716 | 3.93E-10 | MAP2K1, FLT1, SRC, BRAF, FGF1, MAPK14, FGF2, EGFR, PGF, IGF1R, VEGFA, PIK3CA, ADORA2B, KIT, KDR, AKT1, MAPK1, RAF1, MET, FGFR1 | 134 | 210 | 8644 | 6.143567875 | 9.56E-08 | 2.22E-09 | 9.70E-10 |
| KEGG_PATHWAY | hsa04012:ErbB signaling pathway | 14 | 9.929078014 | 4.32E-10 | GSK3B, MAP2K1, SRC, BRAF, EGFR, PTK2, MAPK10, MAPK8, PIK3CA, RPS6KB1, ABL1, AKT1, MAPK1, RAF1 | 134 | 85 | 8644 | 10.62475856 | 1.05E-07 | 2.38E-09 | 1.04E-09 |
| KEGG_PATHWAY | hsa05225:Hepatocellular carcinoma | 18 | 12.76595745 | 6.27E-10 | NQO1, GSK3B, MAP2K1, GSTP1, BRAF, EGFR, TGFBR1, IGF1R, CDK6, TERT, PIK3CA, CCND1, RPS6KB1, CDK4, AKT1, MAPK1, RAF1, MET | 134 | 168 | 8644 | 6.911513859 | 1.52E-07 | 3.39E-09 | 1.48E-09 |
| KEGG_PATHWAY | hsa05235:PD-L1 expression and PD-1 checkpoint pathway in cancer | 14 | 9.929078014 | 7.80E-10 | ALK, MAP2K1, STAT1, STAT3, PTPN11, MAPK14, EGFR, IKBKB, PIK3CA, RPS6KB1, TLR9, AKT1, MAPK1, RAF1 | 134 | 89 | 8644 | 10.14724132 | 1.90E-07 | 4.12E-09 | 1.80E-09 |
| KEGG_PATHWAY | hsa04066:HIF-1 signaling pathway | 15 | 10.63829787 | 9.69E-10 | MAP2K1, FLT1, PFKFB3, NOS2, NOS3, STAT3, EGFR, IGF1R, VEGFA, LDHA, PIK3CA, RPS6KB1, BCL2, AKT1, MAPK1 | 134 | 109 | 8644 | 8.877173764 | 2.35E-07 | 5.01E-09 | 2.18E-09 |
| KEGG_PATHWAY | hsa04115:p53 signaling pathway | 13 | 9.219858156 | 1.04E-09 | IGFBP3, CCND3, CDK6, CCND1, CCNE1, CDK4, CASP3, CHEK1, CDK2, MDM2, BCL2, CDK1, TP73 | 134 | 74 | 8644 | 11.33239209 | 2.53E-07 | 5.27E-09 | 2.30E-09 |
| KEGG_PATHWAY | hsa04370:VEGF signaling pathway | 12 | 8.510638298 | 1.13E-09 | MAP2K1, PIK3CA, SRC, NOS3, KDR, MAPK1, AKT1, RAF1, MAPK14, PTGS2, PTK2, VEGFA | 134 | 59 | 8644 | 13.1201619 | 2.74E-07 | 5.59E-09 | 2.44E-09 |
| KEGG_PATHWAY | hsa05222:Small cell lung cancer | 14 | 9.929078014 | 1.19E-09 | NOS2, PTGS2, FHIT, PTK2, IKBKB, CDK6, PIK3CA, CCND1, CCNE1, CDK4, CASP3, CDK2, BCL2, AKT1 | 134 | 92 | 8644 | 9.816353018 | 2.89E-07 | 5.79E-09 | 2.53E-09 |
| KEGG_PATHWAY | hsa04657:IL-17 signaling pathway | 14 | 9.929078014 | 1.57E-09 | GSK3B, HSP90AA1, MMP1, MMP3, PTGS2, MAPK14, TNF, MMP9, MAPK10, IKBKB, MAPK8, MMP13, CASP3, MAPK1 | 134 | 94 | 8644 | 9.607494443 | 3.80E-07 | 7.46E-09 | 3.25E-09 |
| KEGG_PATHWAY | hsa04660:T cell receptor signaling pathway | 15 | 10.63829787 | 3.91E-09 | GSK3B, MAP2K1, PDPK1, PTPN11, MAPK14, TNF, IL2, MAPK10, IKBKB, MAPK8, PIK3CA, CDK4, AKT1, MAPK1, RAF1 | 134 | 121 | 8644 | 7.996792895 | 9.51E-07 | 1.83E-08 | 7.97E-09 |
| KEGG_PATHWAY | hsa04664:Fc epsilon RI signaling pathway | 12 | 8.510638298 | 5.49E-09 | MAPK10, MAP2K1, MAPK8, SYK, PIK3CA, PDPK1, ALOX5, MAPK1, AKT1, RAF1, MAPK14, TNF | 134 | 68 | 8644 | 11.38366989 | 1.33E-06 | 2.52E-08 | 1.10E-08 |
| KEGG_PATHWAY | hsa05230:Central carbon metabolism in cancer | 12 | 8.510638298 | 7.55E-09 | RET, LDHA, MAP2K1, PIK3CA, FLT3, KIT, MAPK1, AKT1, RAF1, MET, EGFR, FGFR1 | 134 | 70 | 8644 | 11.05842217 | 1.83E-06 | 3.40E-08 | 1.48E-08 |
| KEGG_PATHWAY | hsa05203:Viral carcinogenesis | 18 | 12.76595745 | 1.24E-08 | SYK, HDAC1, SRC, STAT3, HDAC6, CCNA2, CCND3, CDK6, PIK3CA, CCND1, CCNE1, CDK4, CASP3, CHEK1, CDK2, MDM2, CDK1, MAPK1 | 134 | 204 | 8644 | 5.691834943 | 3.02E-06 | 5.50E-08 | 2.40E-08 |
| KEGG_PATHWAY | hsa05214:Glioma | 12 | 8.510638298 | 1.60E-08 | MAP2K1, CDK6, CCND1, PIK3CA, CDK4, MDM2, MAPK1, AKT1, BRAF, RAF1, EGFR, IGF1R | 134 | 75 | 8644 | 10.32119403 | 3.89E-06 | 6.95E-08 | 3.03E-08 |
| KEGG_PATHWAY | hsa04935:Growth hormone synthesis, secretion and action | 14 | 9.929078014 | 3.24E-08 | GSK3B, MAP2K1, STAT1, IGFBP3, STAT3, SSTR2, MAPK14, PTK2, MAPK10, MAPK8, PIK3CA, AKT1, MAPK1, RAF1 | 134 | 120 | 8644 | 7.525870647 | 7.88E-06 | 1.38E-07 | 6.03E-08 |
| KEGG_PATHWAY | hsa04062:Chemokine signaling pathway | 17 | 12.05673759 | 3.45E-08 | GSK3B, MAP2K1, STAT1, SRC, STAT3, CXCR4, BRAF, PIK3CG, PTK2, IKBKB, HCK, PIK3CA, CXCR3, CXCR2, AKT1, MAPK1, RAF1 | 134 | 192 | 8644 | 5.711598259 | 8.39E-06 | 1.45E-07 | 6.31E-08 |
| KEGG_PATHWAY | hsa05166:Human T-cell leukemia virus 1 infection | 18 | 12.76595745 | 4.39E-08 | MAP2K1, TNF, TGFBR1, IL2, MAPK10, CCNA2, IKBKB, CCND3, MAPK8, TERT, PIK3CA, CCND1, CCNE1, CDK4, CHEK1, CDK2, AKT1, MAPK1 | 134 | 222 | 8644 | 5.230334812 | 1.07E-05 | 1.80E-07 | 7.85E-08 |
| KEGG_PATHWAY | hsa05142:Chagas disease | 13 | 9.219858156 | 4.45E-08 | ACE, NOS2, MAPK14, TNF, TGFBR1, IL2, MAPK10, IKBKB, MAPK8, PIK3CA, TLR9, AKT1, MAPK1 | 134 | 102 | 8644 | 8.221539362 | 1.08E-05 | 1.80E-07 | 7.85E-08 |
| KEGG_PATHWAY | hsa05171:Coronavirus disease - COVID-19 | 18 | 12.76595745 | 8.40E-08 | ACE, SYK, STAT1, MMP1, STAT3, MMP3, F2, MAPK14, TNF, EGFR, IL2, MAPK10, SELP, IKBKB, ADAM17, MAPK8, PIK3CA, MAPK1 | 134 | 232 | 8644 | 5.004889346 | 2.04E-05 | 3.33E-07 | 1.45E-07 |
| KEGG_PATHWAY | hsa04931:Insulin resistance | 13 | 9.219858156 | 8.49E-08 | GSK3B, NOS3, PDPK1, STAT3, PTPN11, TNF, MAPK10, IKBKB, MAPK8, PIK3CA, RPS6KB1, AKT1, PPARA | 134 | 108 | 8644 | 7.764787175 | 2.06E-05 | 3.33E-07 | 1.45E-07 |
| KEGG_PATHWAY | hsa05120:Epithelial cell signaling in Helicobacter pylori infection | 11 | 7.80141844 | 9.59E-08 | MAPK10, IKBKB, ADAM17, MAPK8, SRC, CASP3, CXCR2, PTPN11, MAPK14, MET, EGFR | 134 | 70 | 8644 | 10.13688699 | 2.33E-05 | 3.70E-07 | 1.61E-07 |
| KEGG_PATHWAY | hsa04110:Cell cycle | 15 | 10.63829787 | 1.13E-07 | GSK3B, HDAC1, PLK1, CDC25A, CCNA2, CCND3, CDK6, CCND1, CCNE1, CDK4, CHEK1, CDK2, MDM2, CDK1, ABL1 | 134 | 157 | 8644 | 6.163133378 | 2.74E-05 | 4.29E-07 | 1.87E-07 |
| KEGG_PATHWAY | hsa05170:Human immunodeficiency virus 1 infection | 17 | 12.05673759 | 1.38E-07 | MAP2K1, CXCR4, MAPK14, TNF, PTK2, MAPK10, IKBKB, MAPK8, PIK3CA, RPS6KB1, CASP3, CHEK1, BCL2, CDK1, AKT1, MAPK1, RAF1 | 134 | 212 | 8644 | 5.172768234 | 3.36E-05 | 5.17E-07 | 2.26E-07 |
| KEGG_PATHWAY | hsa05213:Endometrial cancer | 10 | 7.092198582 | 2.07E-07 | GSK3B, MAP2K1, CCND1, PIK3CA, PDPK1, MAPK1, AKT1, BRAF, RAF1, EGFR | 134 | 58 | 8644 | 11.12197633 | 5.04E-05 | 7.63E-07 | 3.33E-07 |
| KEGG_PATHWAY | hsa04919:Thyroid hormone signaling pathway | 13 | 9.219858156 | 3.01E-07 | GSK3B, MAP2K1, PDPK1, STAT1, HDAC1, SRC, ESR1, PIK3CA, CCND1, MDM2, AKT1, MAPK1, RAF1 | 134 | 121 | 8644 | 6.930553842 | 7.30E-05 | 1.07E-06 | 4.69E-07 |
| KEGG_PATHWAY | hsa04071:Sphingolipid signaling pathway | 13 | 9.219858156 | 3.01E-07 | MAP2K1, ABCC1, NOS3, PDPK1, MAPK14, TNF, MAPK10, MAPK8, PIK3CA, BCL2, AKT1, MAPK1, RAF1 | 134 | 121 | 8644 | 6.930553842 | 7.30E-05 | 1.07E-06 | 4.69E-07 |
| KEGG_PATHWAY | hsa05152:Tuberculosis | 15 | 10.63829787 | 6.13E-07 | SYK, NOS2, STAT1, SRC, MAPK14, TNF, CTSS, MAPK10, MAPK8, CASP3, BCL2, TLR9, AKT1, MAPK1, RAF1 | 134 | 180 | 8644 | 5.375621891 | 1.49E-04 | 2.16E-06 | 9.42E-07 |
| KEGG_PATHWAY | hsa04380:Osteoclast differentiation | 13 | 9.219858156 | 9.89E-07 | MAP2K1, SYK, STAT1, MAPK14, TNF, TGFBR1, MAPK10, IKBKB, MAPK8, PIK3CA, AKT1, MAPK1, PPARG | 134 | 135 | 8644 | 6.21182974 | 2.40E-04 | 3.43E-06 | 1.50E-06 |
| KEGG_PATHWAY | hsa05135:Yersinia infection | 13 | 9.219858156 | 1.16E-06 | GSK3B, MAP2K1, SRC, MAPK14, TNF, IL2, PTK2, MAPK10, IKBKB, MAPK8, PIK3CA, AKT1, MAPK1 | 134 | 137 | 8644 | 6.121146094 | 2.81E-04 | 3.97E-06 | 1.73E-06 |
| KEGG_PATHWAY | hsa04140:Autophagy - animal | 14 | 9.929078014 | 1.37E-06 | MAP2K1, DAPK1, PDPK1, IGF1R, MAPK10, MAPK8, PIK3CA, RPS6KB1, CTSL, BCL2, AKT1, MAPK1, RAF1, CTSB | 134 | 165 | 8644 | 5.47336047 | 3.32E-04 | 4.62E-06 | 2.01E-06 |
| KEGG_PATHWAY | hsa04148:Efferocytosis | 13 | 9.219858156 | 4.57E-06 | MAP2K1, ARG1, ODC1, PTPN11, PTGS2, MAPK14, PTK2, CASP7, ADAM17, CASP3, ALOX5, MAPK1, PPARG | 134 | 156 | 8644 | 5.375621891 | 0.001109922 | 1.52E-05 | 6.64E-06 |
| KEGG_PATHWAY | hsa04620:Toll-like receptor signaling pathway | 11 | 7.80141844 | 5.71E-06 | MAPK10, IKBKB, MAP2K1, MAPK8, PIK3CA, STAT1, TLR9, MAPK1, AKT1, MAPK14, TNF | 134 | 108 | 8644 | 6.570204533 | 0.001386256 | 1.87E-05 | 8.18E-06 |
| KEGG_PATHWAY | hsa05132:Salmonella infection | 16 | 11.34751773 | 5.98E-06 | MAP2K1, HSP90AA1, MAPK14, TNF, PIK3CG, MAPK10, IKBKB, CASP7, MAPK8, PIK3CA, CASP3, BCL2, TLR9, AKT1, MAPK1, RAF1 | 134 | 249 | 8644 | 4.145057843 | 0.001452591 | 1.94E-05 | 8.45E-06 |
| KEGG_PATHWAY | hsa04020:Calcium signaling pathway | 16 | 11.34751773 | 7.26E-06 | RET, FLT1, NOS2, NOS3, CHRNA7, CXCR4, HTR2A, FGF1, FGF2, EGFR, VEGFA, EDNRA, ADORA2B, KDR, MET, FGFR1 | 134 | 253 | 8644 | 4.079523332 | 0.001762958 | 2.32E-05 | 1.01E-05 |
| KEGG_PATHWAY | hsa04910:Insulin signaling pathway | 12 | 8.510638298 | 7.70E-06 | MAPK10, IKBKB, GSK3B, MAP2K1, MAPK8, RPS6KB1, PIK3CA, PDPK1, MAPK1, AKT1, BRAF, RAF1 | 134 | 137 | 8644 | 5.650288702 | 0.001870465 | 2.43E-05 | 1.06E-05 |
| KEGG_PATHWAY | hsa05202:Transcriptional misregulation in cancer | 14 | 9.929078014 | 7.82E-06 | FLT1, FLT3, HDAC1, IGFBP3, MMP3, PLAT, MMP9, PTK2, IGF1R, CCNA2, PLAU, MDM2, PPARG, MET | 134 | 193 | 8644 | 4.679297811 | 0.001899009 | 2.44E-05 | 1.06E-05 |
| KEGG_PATHWAY | hsa04630:JAK-STAT signaling pathway | 13 | 9.219858156 | 8.68E-06 | STAT1, STAT3, PTPN11, EGFR, IL2, CCND3, PIK3CA, CCND1, PIM1, BCL2, AKT1, RAF1, MCL1 | 134 | 166 | 8644 | 5.051789247 | 0.002107662 | 2.67E-05 | 1.17E-05 |
| KEGG_PATHWAY | hsa05211:Renal cell carcinoma | 9 | 6.382978723 | 9.67E-06 | MAP2K1, PIK3CA, MAPK1, AKT1, BRAF, PTPN11, RAF1, MET, VEGFA | 134 | 69 | 8644 | 8.414016872 | 0.002345967 | 2.94E-05 | 1.28E-05 |
| KEGG_PATHWAY | hsa04912:GnRH signaling pathway | 10 | 7.092198582 | 1.19E-05 | MAPK10, MMP14, MAP2K1, MAPK8, SRC, MMP2, MAPK1, RAF1, MAPK14, EGFR | 134 | 93 | 8644 | 6.93628631 | 0.002884987 | 3.57E-05 | 1.56E-05 |
| KEGG_PATHWAY | hsa05415:Diabetic cardiomyopathy | 14 | 9.929078014 | 1.35E-05 | GSK3B, ACE, PARP1, NOS3, MMP2, GSR, MAPK14, MMP9, TGFBR1, MAPK10, MAPK8, PIK3CA, AKT1, PPARA | 134 | 203 | 8644 | 4.44879053 | 0.003278935 | 4.01E-05 | 1.75E-05 |
| KEGG_PATHWAY | hsa01524:Platinum drug resistance | 9 | 6.382978723 | 1.48E-05 | TOP2A, PIK3CA, PDPK1, CASP3, GSTP1, MDM2, BCL2, MAPK1, AKT1 | 134 | 73 | 8644 | 7.952974852 | 0.003579704 | 4.32E-05 | 1.88E-05 |
| KEGG_PATHWAY | hsa04072:Phospholipase D signaling pathway | 12 | 8.510638298 | 1.61E-05 | MAP2K1, SYK, PIK3CA, KIT, CXCR2, MAPK1, AKT1, PTPN11, F2, RAF1, EGFR, PIK3CG | 134 | 148 | 8644 | 5.230334812 | 0.003906568 | 4.66E-05 | 2.03E-05 |
| KEGG_PATHWAY | hsa05231:Choline metabolism in cancer | 10 | 7.092198582 | 1.82E-05 | MAPK10, MAP2K1, MAPK8, RPS6KB1, PIK3CA, PDPK1, MAPK1, AKT1, RAF1, EGFR | 134 | 98 | 8644 | 6.582394152 | 0.004420547 | 5.21E-05 | 2.27E-05 |
| KEGG_PATHWAY | hsa05131:Shigellosis | 15 | 10.63829787 | 2.48E-05 | GSK3B, SRC, MAPK14, TNF, EGFR, PTK2, MAPK10, IKBKB, MAPK8, PIK3CA, RPS6KB1, MDM2, BCL2, AKT1, MAPK1 | 134 | 247 | 8644 | 3.917457248 | 0.006001486 | 6.95E-05 | 3.03E-05 |
| KEGG_PATHWAY | hsa04932:Non-alcoholic fatty liver disease | 12 | 8.510638298 | 2.49E-05 | MAPK10, IKBKB, GSK3B, CASP7, MAPK8, PIK3CA, CASP3, AKT1, PPARG, MAPK14, PPARA, TNF | 134 | 155 | 8644 | 4.994126143 | 0.006027118 | 6.95E-05 | 3.03E-05 |
| KEGG_PATHWAY | hsa04150:mTOR signaling pathway | 12 | 8.510638298 | 2.64E-05 | IKBKB, GSK3B, MAP2K1, RPS6KB1, PIK3CA, PDPK1, MAPK1, AKT1, BRAF, RAF1, TNF, IGF1R | 134 | 156 | 8644 | 4.962112514 | 0.006399161 | 7.30E-05 | 3.18E-05 |
| KEGG_PATHWAY | hsa04213:Longevity regulating pathway - multiple species | 8 | 5.673758865 | 3.81E-05 | HSPA8, RPS6KB1, PIK3CA, HDAC1, AKT1, SOD2, HSPA1A, IGF1R | 134 | 61 | 8644 | 8.459995106 | 0.009210311 | 1.04E-04 | 4.54E-05 |
| KEGG_PATHWAY | hsa04659:Th17 cell differentiation | 10 | 7.092198582 | 3.98E-05 | MAPK10, IKBKB, HSP90AA1, MAPK8, STAT1, STAT3, MAPK1, MAPK14, TGFBR1, IL2 | 134 | 108 | 8644 | 5.972913212 | 0.009627115 | 1.07E-04 | 4.69E-05 |
| KEGG_PATHWAY | hsa04810:Regulation of actin cytoskeleton | 14 | 9.929078014 | 4.82E-05 | MAP2K1, SRC, CXCR4, BRAF, F2, FGF1, FGF2, EGFR, PTK2, PIK3CA, AKT1, MAPK1, RAF1, FGFR1 | 134 | 229 | 8644 | 3.943687675 | 0.011655149 | 1.29E-04 | 5.62E-05 |
| KEGG_PATHWAY | hsa04371:Apelin signaling pathway | 11 | 7.80141844 | 5.25E-05 | MAP2K1, CCND1, RPS6KB1, NOS2, NOS3, MAPK1, AKT1, PLAT, RAF1, TGFBR1, PIK3CG | 134 | 139 | 8644 | 5.104907119 | 0.012669509 | 1.39E-04 | 6.05E-05 |
| KEGG_PATHWAY | hsa05164:Influenza A | 12 | 8.510638298 | 6.16E-05 | IKBKB, CCND3, MAP2K1, CDK6, PIK3CA, STAT1, CDK4, CASP3, MAPK1, AKT1, RAF1, TNF | 134 | 171 | 8644 | 4.526839487 | 0.014858635 | 1.61E-04 | 7.02E-05 |
| KEGG_PATHWAY | hsa04936:Alcoholic liver disease | 11 | 7.80141844 | 6.29E-05 | MAPK10, IKBKB, GSK3B, MAPK8, CCND1, CASP3, NOX4, AKT1, MAPK14, PPARA, TNF | 134 | 142 | 8644 | 4.997056969 | 0.015174737 | 1.63E-04 | 7.10E-05 |
| KEGG_PATHWAY | hsa04550:Signaling pathways regulating pluripotency of stem cells | 11 | 7.80141844 | 6.68E-05 | GSK3B, MAP2K1, PIK3CA, STAT3, MAPK1, AKT1, RAF1, MAPK14, FGF2, FGFR1, IGF1R | 134 | 143 | 8644 | 4.962112514 | 0.016097486 | 1.71E-04 | 7.45E-05 |
| KEGG_PATHWAY | hsa05010:Alzheimer disease | 18 | 12.76595745 | 7.77E-05 | GSK3B, MAP2K1, NOS2, CHRNA7, BRAF, PTGS2, TNF, MAPK10, IKBKB, CASP7, ADAM17, MAPK8, PIK3CA, CASP3, NOX4, AKT1, MAPK1, RAF1 | 134 | 384 | 8644 | 3.023787313 | 0.018715598 | 1.97E-04 | 8.58E-05 |
| KEGG_PATHWAY | hsa04920:Adipocytokine signaling pathway | 8 | 5.673758865 | 8.50E-05 | MAPK10, IKBKB, MAPK8, STAT3, AKT1, PTPN11, PPARA, TNF | 134 | 69 | 8644 | 7.479126109 | 0.020450733 | 2.13E-04 | 9.29E-05 |
| KEGG_PATHWAY | hsa05133:Pertussis | 8 | 5.673758865 | 1.58E-04 | MAPK10, CASP7, MAPK8, NOS2, CASP3, MAPK1, MAPK14, TNF | 134 | 76 | 8644 | 6.79025923 | 0.037572982 | 3.91E-04 | 1.70E-04 |
| KEGG_PATHWAY | hsa04114:Oocyte meiosis | 10 | 7.092198582 | 1.79E-04 | MAP2K1, CCNE1, PLK1, CDK2, CDK1, MAPK1, PGR, MAPK14, AURKA, IGF1R | 134 | 131 | 8644 | 4.924233793 | 0.042489923 | 4.39E-04 | 1.91E-04 |
| KEGG_PATHWAY | hsa04612:Antigen processing and presentation | 8 | 5.673758865 | 1.86E-04 | HSPA8, HSP90AA1, HSPA5, CTSL, TNF, CTSS, CTSB, HSPA1A | 134 | 78 | 8644 | 6.616150019 | 0.044114053 | 4.51E-04 | 1.97E-04 |
| KEGG_PATHWAY | hsa04928:Parathyroid hormone synthesis, secretion and action | 9 | 6.382978723 | 2.17E-04 | MMP14, MAP2K1, MMP13, BCL2, MAPK1, BRAF, RAF1, EGFR, FGFR1 | 134 | 106 | 8644 | 5.477048719 | 0.051262474 | 5.21E-04 | 2.27E-04 |
| KEGG_PATHWAY | hsa05130:Pathogenic Escherichia coli infection | 12 | 8.510638298 | 2.28E-04 | MAPK10, IKBKB, CASP7, MAPK8, SRC, CASP3, ABL1, MAPK1, PTPN11, F2, MAPK14, TNF | 134 | 198 | 8644 | 3.909543193 | 0.053789251 | 5.42E-04 | 2.36E-04 |
| KEGG_PATHWAY | hsa05216:Thyroid cancer | 6 | 4.255319149 | 2.35E-04 | RET, MAP2K1, CCND1, MAPK1, BRAF, PPARG | 134 | 37 | 8644 | 10.46066962 | 0.055454067 | 5.54E-04 | 2.42E-04 |
| KEGG_PATHWAY | hsa04662:B cell receptor signaling pathway | 8 | 5.673758865 | 2.95E-04 | IKBKB, GSK3B, MAP2K1, SYK, PIK3CA, MAPK1, AKT1, RAF1 | 134 | 84 | 8644 | 6.143567875 | 0.06915802 | 6.89E-04 | 3.01E-04 |
| KEGG_PATHWAY | hsa04726:Serotonergic synapse | 9 | 6.382978723 | 3.78E-04 | MAP2K1, ALOX5, CASP3, MAPK1, BRAF, HTR2A, RAF1, PTGS2, SLC6A4 | 134 | 115 | 8644 | 5.048410123 | 0.087851447 | 8.76E-04 | 3.82E-04 |
| KEGG_PATHWAY | hsa04360:Axon guidance | 11 | 7.80141844 | 4.81E-04 | GSK3B, PIK3CA, PDPK1, SRC, ABL1, MAPK1, CXCR4, PTPN11, RAF1, MET, PTK2 | 134 | 182 | 8644 | 3.89880269 | 0.1104316 | 0.001103686 | 4.81E-04 |
| KEGG_PATHWAY | hsa04152:AMPK signaling pathway | 9 | 6.382978723 | 5.33E-04 | CCNA2, PFKFB3, CCND1, RPS6KB1, PIK3CA, PDPK1, AKT1, PPARG, IGF1R | 134 | 121 | 8644 | 4.798075737 | 0.121484016 | 0.001210156 | 5.33E-04 |
| KEGG_PATHWAY | hsa04934:Cushing syndrome | 10 | 7.092198582 | 6.23E-04 | GSK3B, MAP2K1, CDK6, CCND1, CCNE1, CDK4, CDK2, MAPK1, BRAF, EGFR | 134 | 155 | 8644 | 4.161771786 | 0.140430598 | 0.001398674 | 6.23E-04 |
| KEGG_PATHWAY | hsa04611:Platelet activation | 9 | 6.382978723 | 6.27E-04 | SYK, PIK3CA, SRC, NOS3, MAPK1, AKT1, F2, MAPK14, PIK3CG | 134 | 124 | 8644 | 4.68199326 | 0.141443967 | 0.001398674 | 6.27E-04 |
| KEGG_PATHWAY | hsa04930:Type II diabetes mellitus | 6 | 4.255319149 | 6.61E-04 | MAPK10, IKBKB, MAPK8, PIK3CA, MAPK1, TNF | 134 | 46 | 8644 | 8.414016872 | 0.148402799 | 0.001459896 | 6.61E-04 |
| KEGG_PATHWAY | hsa04613:Neutrophil extracellular trap formation | 11 | 7.80141844 | 7.03E-04 | SELP, MAP2K1, SYK, PIK3CA, HDAC1, SRC, MAPK1, AKT1, RAF1, MAPK14, HDAC6 | 134 | 191 | 8644 | 3.715089474 | 0.157002571 | 0.00153812 | 7.03E-04 |
| KEGG_PATHWAY | hsa04666:Fc gamma R-mediated phagocytosis | 8 | 5.673758865 | 7.09E-04 | HCK, MAP2K1, SYK, RPS6KB1, PIK3CA, MAPK1, AKT1, RAF1 | 134 | 97 | 8644 | 5.320203108 | 0.158303864 | 0.001538171 | 7.09E-04 |
| KEGG_PATHWAY | hsa04650:Natural killer cell mediated cytotoxicity | 9 | 6.382978723 | 7.35E-04 | MAP2K1, SYK, PIK3CA, CASP3, MAPK1, BRAF, PTPN11, RAF1, TNF | 134 | 127 | 8644 | 4.571394994 | 0.163624481 | 0.001580636 | 7.35E-04 |
| KEGG_PATHWAY | hsa01523:Antifolate resistance | 5 | 3.546099291 | 0.001076328 | DHFR, IKBKB, ABCC1, TYMS, TNF | 134 | 30 | 8644 | 10.75124378 | 0.230249196 | 0.002294277 | 0.001076328 |
| KEGG_PATHWAY | hsa04215:Apoptosis - multiple species | 5 | 3.546099291 | 0.001379164 | MAPK10, CASP7, MAPK8, CASP3, BCL2 | 134 | 32 | 8644 | 10.07929104 | 0.284925264 | 0.002914234 | 0.001379164 |
| KEGG_PATHWAY | hsa04621:NOD-like receptor signaling pathway | 10 | 7.092198582 | 0.002242114 | MAPK10, IKBKB, HSP90AA1, MAPK8, STAT1, BCL2, MAPK1, MAPK14, TNF, CTSB | 134 | 186 | 8644 | 3.468143155 | 0.420416453 | 0.004696843 | 0.002242114 |
| KEGG_PATHWAY | hsa04540:Gap junction | 7 | 4.964539007 | 0.002288926 | MAP2K1, SRC, CDK1, MAPK1, HTR2A, RAF1, EGFR | 134 | 88 | 8644 | 5.131275441 | 0.426986761 | 0.004753922 | 0.002288926 |
| KEGG_PATHWAY | hsa04024:cAMP signaling pathway | 11 | 7.80141844 | 0.002414866 | MAPK10, MAP2K1, EDNRA, MAPK8, PIK3CA, MAPK1, AKT1, BRAF, SSTR2, RAF1, PPARA | 134 | 225 | 8644 | 3.153698176 | 0.444297485 | 0.004972987 | 0.002414866 |
| KEGG_PATHWAY | hsa04921:Oxytocin signaling pathway | 9 | 6.382978723 | 0.002531707 | MAP2K1, CCND1, SRC, NOS3, MAPK1, RAF1, PTGS2, EGFR, PIK3CG | 134 | 154 | 8644 | 3.769916651 | 0.459891285 | 0.005158737 | 0.002531707 |
| KEGG_PATHWAY | hsa05022:Pathways of neurodegeneration - multiple diseases | 17 | 12.05673759 | 0.002547524 | GSK3B, MAP2K1, NOS2, HSPA5, CHRNA7, BRAF, PTGS2, MAPK14, TNF, MAPK10, CASP7, MAPK8, CASP3, BCL2, NOX4, MAPK1, RAF1 | 134 | 476 | 8644 | 2.303837953 | 0.46196854 | 0.005158737 | 0.002547524 |
| KEGG_PATHWAY | hsa04658:Th1 and Th2 cell differentiation | 7 | 4.964539007 | 0.002865196 | MAPK10, IKBKB, MAPK8, STAT1, MAPK1, MAPK14, IL2 | 134 | 92 | 8644 | 4.908176509 | 0.502043198 | 0.005754071 | 0.002865196 |
| KEGG_PATHWAY | hsa04929:GnRH secretion | 6 | 4.255319149 | 0.002948619 | MAP2K1, PIK3CA, MAPK1, AKT1, RAF1, ESR2 | 134 | 64 | 8644 | 6.047574627 | 0.51206486 | 0.005873068 | 0.002948619 |
| KEGG_PATHWAY | hsa04520:Adherens junction | 7 | 4.964539007 | 0.003024859 | SRC, MAPK1, MET, EGFR, TGFBR1, FGFR1, IGF1R | 134 | 93 | 8644 | 4.855400417 | 0.521047945 | 0.005975942 | 0.003024859 |
| KEGG_PATHWAY | hsa04750:Inflammatory mediator regulation of TRP channels | 7 | 4.964539007 | 0.003924976 | MAPK10, MAPK8, PIK3CA, SRC, TRPV1, HTR2A, MAPK14 | 134 | 98 | 8644 | 4.607675906 | 0.615436306 | 0.007691687 | 0.003924976 |
| KEGG_PATHWAY | hsa04064:NF-kappa B signaling pathway | 7 | 4.964539007 | 0.005251121 | IKBKB, SYK, PARP1, PLAU, BCL2, PTGS2, TNF | 134 | 104 | 8644 | 4.34184845 | 0.721791528 | 0.01020818 | 0.005251121 |
| KEGG_PATHWAY | hsa05140:Leishmaniasis | 6 | 4.255319149 | 0.006521547 | NOS2, STAT1, MAPK1, MAPK14, PTGS2, TNF | 134 | 77 | 8644 | 5.026555534 | 0.79605931 | 0.01257727 | 0.006521547 |
| KEGG_PATHWAY | hsa05144:Malaria | 5 | 3.546099291 | 0.007139345 | SELP, TLR9, SELE, TNF, MET | 134 | 50 | 8644 | 6.450746269 | 0.824669667 | 0.013660322 | 0.007139345 |
| KEGG_PATHWAY | hsa04913:Ovarian steroidogenesis | 5 | 3.546099291 | 0.007656302 | ALOX5, CYP1B1, PTGS2, CYP19A1, IGF1R | 134 | 51 | 8644 | 6.324261048 | 0.845512201 | 0.014535011 | 0.007656302 |
| KEGG_PATHWAY | hsa04725:Cholinergic synapse | 7 | 4.964539007 | 0.007819284 | MAP2K1, PIK3CA, CHRNA7, BCL2, MAPK1, AKT1, PIK3CG | 134 | 113 | 8644 | 3.996037512 | 0.851556913 | 0.014729349 | 0.007819284 |
| KEGG_PATHWAY | hsa04670:Leukocyte transendothelial migration | 7 | 4.964539007 | 0.008494791 | PIK3CA, MMP2, CXCR4, PTPN11, MAPK14, MMP9, PTK2 | 134 | 115 | 8644 | 3.926541207 | 0.874198714 | 0.015878724 | 0.008494791 |
| KEGG_PATHWAY | hsa05020:Prion disease | 11 | 7.80141844 | 0.009090669 | MAPK10, HSPA8, GSK3B, MAPK8, PIK3CA, HSPA5, CASP3, MAPK1, MAPK14, TNF, HSPA1A | 134 | 272 | 8644 | 2.608757682 | 0.891296871 | 0.016862845 | 0.009090669 |
| KEGG_PATHWAY | hsa04390:Hippo signaling pathway | 8 | 5.673758865 | 0.010535652 | YAP1, GSK3B, CCND3, BMP2, CCND1, FGF1, TGFBR1, TP73 | 134 | 157 | 8644 | 3.287004468 | 0.923750569 | 0.019386361 | 0.010535652 |
| KEGG_PATHWAY | hsa05134:Legionellosis | 5 | 3.546099291 | 0.010610642 | HSPA8, CASP7, CASP3, TNF, HSPA1A | 134 | 56 | 8644 | 5.759594883 | 0.925142032 | 0.019386361 | 0.010610642 |
| KEGG_PATHWAY | hsa04217:Necroptosis | 8 | 5.673758865 | 0.011245772 | MAPK10, HSP90AA1, MAPK8, PARP1, STAT1, STAT3, BCL2, TNF | 134 | 159 | 8644 | 3.2456585 | 0.935957253 | 0.020393452 | 0.011245772 |
| KEGG_PATHWAY | hsa04211:Longevity regulating pathway | 6 | 4.255319149 | 0.011844411 | RPS6KB1, PIK3CA, AKT1, PPARG, SOD2, IGF1R | 134 | 89 | 8644 | 4.348817709 | 0.944721595 | 0.02131994 | 0.011844411 |
| KEGG_PATHWAY | hsa04730:Long-term depression | 5 | 3.546099291 | 0.0134418 | MAP2K1, MAPK1, BRAF, RAF1, IGF1R | 134 | 60 | 8644 | 5.375621891 | 0.962690563 | 0.024017334 | 0.0134418 |
| KEGG_PATHWAY | hsa05323:Rheumatoid arthritis | 6 | 4.255319149 | 0.014129751 | FLT1, MMP1, CTSL, MMP3, TNF, VEGFA | 134 | 93 | 8644 | 4.161771786 | 0.968507883 | 0.02506226 | 0.014129751 |
| KEGG_PATHWAY | hsa04141:Protein processing in endoplasmic reticulum | 8 | 5.673758865 | 0.015785756 | MAPK10, HSPA8, HSP90AA1, MAPK8, HSPA5, BAG1, BCL2, HSPA1A | 134 | 170 | 8644 | 3.035645303 | 0.979069286 | 0.027796657 | 0.015785756 |
| KEGG_PATHWAY | hsa05146:Amoebiasis | 6 | 4.255319149 | 0.020314472 | PIK3CA, NOS2, ARG1, CASP3, TNF, PTK2 | 134 | 102 | 8644 | 3.794556629 | 0.99317557 | 0.035513788 | 0.020314472 |
| KEGG_PATHWAY | hsa04622:RIG-I-like receptor signaling pathway | 5 | 3.546099291 | 0.023554006 | MAPK10, IKBKB, MAPK8, MAPK14, TNF | 134 | 71 | 8644 | 4.542779062 | 0.996948458 | 0.040883025 | 0.023554006 |
| KEGG_PATHWAY | hsa04350:TGF-beta signaling pathway | 6 | 4.255319149 | 0.025293245 | BMP2, RPS6KB1, HDAC1, MAPK1, TNF, TGFBR1 | 134 | 108 | 8644 | 3.583747927 | 0.998021318 | 0.043590487 | 0.025293245 |
| KEGG_PATHWAY | hsa03320:PPAR signaling pathway | 5 | 3.546099291 | 0.028124702 | FABP5, PDPK1, MMP1, PPARG, PPARA | 134 | 75 | 8644 | 4.300497512 | 0.999024197 | 0.048128891 | 0.028124702 |
| KEGG_PATHWAY | hsa04144:Endocytosis | 9 | 6.382978723 | 0.038844632 | HSPA8, SRC, CXCR2, MDM2, CXCR4, EGFR, TGFBR1, HSPA1A, IGF1R | 134 | 250 | 8644 | 2.322268657 | 0.999934106 | 0.066008711 | 0.038844632 |
| KEGG_PATHWAY | hsa00330:Arginine and proline metabolism | 4 | 2.836879433 | 0.04131415 | NOS2, NOS3, ARG1, ODC1 | 134 | 50 | 8644 | 5.160597015 | 0.999964735 | 0.069717628 | 0.04131415 |
| KEGG_PATHWAY | hsa04022:cGMP-PKG signaling pathway | 7 | 4.964539007 | 0.043812771 | MAP2K1, EDNRA, NOS3, MAPK1, AKT1, RAF1, PIK3CG | 134 | 167 | 8644 | 2.703905622 | 0.999981296 | 0.073424162 | 0.043812771 |
| KEGG_PATHWAY | hsa00220:Arginine biosynthesis | 3 | 2.127659574 | 0.044407104 | NOS2, NOS3, ARG1 | 134 | 22 | 8644 | 8.796472185 | 0.999983919 | 0.073910455 | 0.044407104 |
| KEGG_PATHWAY | hsa04270:Vascular smooth muscle contraction | 6 | 4.255319149 | 0.055516668 | MAP2K1, EDNRA, ADORA2B, MAPK1, BRAF, RAF1 | 134 | 134 | 8644 | 2.888393852 | 0.999999062 | 0.091772451 | 0.055516668 |
| KEGG_PATHWAY | hsa04061:Viral protein interaction with cytokine and cytokine receptor | 5 | 3.546099291 | 0.067994011 | CXCR3, CXCR2, CXCR4, TNF, IL2 | 134 | 100 | 8644 | 3.225373134 | 0.999999963 | 0.111638815 | 0.067994011 |
| KEGG_PATHWAY | hsa05034:Alcoholism | 7 | 4.964539007 | 0.0697904 | MAP2K1, ADORA2B, HDAC1, MAPK1, BRAF, RAF1, HDAC6 | 134 | 188 | 8644 | 2.401873611 | 0.999999977 | 0.113386367 | 0.0697904 |
| KEGG_PATHWAY | hsa04916:Melanogenesis | 5 | 3.546099291 | 0.069991585 | GSK3B, MAP2K1, KIT, MAPK1, RAF1 | 134 | 101 | 8644 | 3.193438747 | 0.999999978 | 0.113386367 | 0.069991585 |
| KEGG_PATHWAY | hsa05321:Inflammatory bowel disease | 4 | 2.836879433 | 0.078186119 | STAT1, STAT3, TNF, IL2 | 134 | 65 | 8644 | 3.969690011 | 0.999999997 | 0.125822694 | 0.078186119 |
| KEGG_PATHWAY | hsa04720:Long-term potentiation | 4 | 2.836879433 | 0.083912943 | MAP2K1, MAPK1, BRAF, RAF1 | 134 | 67 | 8644 | 3.851191802 | 0.999999999 | 0.134150297 | 0.083912943 |

**Supplementary Table 5** The degree value sorting.

| **Name** | **Degree** | **Betweenness** | **Closeness** |
| --- | --- | --- | --- |
| STAT3 | 92 | 1678.6387 | 0.5613208 |
| HSP90AA1 | 92 | 1773.614 | 0.5586854 |
| AKT1 | 88 | 1594.6498 | 0.5833333 |
| EGFR | 84 | 1473.6672 | 0.569378 |
| TNF | 74 | 1961.0135 | 0.54587156 |
| SRC | 70 | 484.6299 | 0.53125 |
| CCND1 | 60 | 470.08112 | 0.506383 |
| ESR1 | 58 | 535.6254 | 0.5265487 |
| CASP3 | 54 | 670.1849 | 0.52422905 |
| MMP9 | 52 | 882.85565 | 0.508547 |
| MAPK1 | 46 | 304.46466 | 0.49173555 |
| PTPN11 | 42 | 205.03447 | 0.45419848 |
| FGF2 | 42 | 403.87607 | 0.4857143 |
| PARP1 | 38 | 429.8899 | 0.46303502 |
| ALB | 38 | 674.7407 | 0.48178136 |
| MAPK8 | 36 | 189.81097 | 0.48178136 |
| PTGS2 | 34 | 799.2906 | 0.48971194 |
| MAPK14 | 34 | 195.66049 | 0.46666667 |
| GSK3B | 34 | 91.34579 | 0.4490566 |
| CDK2 | 34 | 72.224625 | 0.4219858 |
| CDK4 | 32 | 112.376465 | 0.425 |
| CDK1 | 32 | 383.4337 | 0.44402984 |
| PTK2 | 30 | 77.360855 | 0.4473684 |
| HDAC1 | 30 | 227.53987 | 0.4559387 |
| MET | 28 | 84.966194 | 0.4524715 |
| IGF1R | 28 | 91.903656 | 0.43430656 |
| HSPA8 | 28 | 65.29045 | 0.44402984 |
| CXCR4 | 28 | 380.40073 | 0.46484375 |
| BRAF | 28 | 41.26488 | 0.4391144 |
| RAF1 | 26 | 67.56628 | 0.44074073 |
| PPARG | 26 | 201.35709 | 0.46666667 |
| PGR | 26 | 40.739803 | 0.44402984 |
| MAP2K1 | 26 | 53.05607 | 0.45945945 |
| KDR | 26 | 100.44833 | 0.4524715 |
| CCNA2 | 26 | 191.83638 | 0.41319445 |
| NR3C1 | 24 | 83.322975 | 0.4559387 |
| AURKA | 24 | 95.39312 | 0.38636363 |
| ANXA5 | 24 | 98.88491 | 0.45419848 |
| TOP2A | 22 | 54.73054 | 0.35843372 |
| MMP3 | 22 | 145.13295 | 0.43430656 |
| MCL1 | 22 | 18.3601 | 0.44402984 |
| HSPA5 | 22 | 50.96073 | 0.42348754 |
| CHEK1 | 22 | 189.49138 | 0.4117647 |
| CDC25A | 22 | 18.060799 | 0.3628049 |
| PIK3CG | 20 | 22.53595 | 0.4219858 |
| KIT | 20 | 22.174885 | 0.43272728 |
| ESR2 | 20 | 19.728027 | 0.4204947 |
| SYK | 18 | 39.073982 | 0.40753424 |
| PLK1 | 18 | 15.803889 | 0.39144737 |
| NOS3 | 18 | 336.61676 | 0.4375 |
| HDAC6 | 18 | 22.938797 | 0.42805755 |
| FLT1 | 18 | 34.643337 | 0.3979933 |
| FGF1 | 18 | 33.501575 | 0.39534885 |
| ABL1 | 18 | 73.42026 | 0.42805755 |
| RPS6KB1 | 16 | 6.315081 | 0.41034484 |
| PLAU | 16 | 39.60401 | 0.38636363 |
| MMP1 | 16 | 26.237312 | 0.4204947 |
| HCK | 16 | 7.3335476 | 0.4047619 |
| CCND3 | 16 | 11.079324 | 0.39666668 |
| YAP1 | 14 | 65.66172 | 0.4006734 |
| TYMS | 14 | 470 | 0.32425067 |
| TGFBR1 | 14 | 36.646385 | 0.3888889 |
| NOS2 | 14 | 46.23149 | 0.4456929 |
| IL2 | 14 | 24.656698 | 0.4219858 |
| IKBKB | 14 | 26.370245 | 0.43589744 |
| CDK6 | 14 | 21.978634 | 0.39932886 |
| BAG1 | 14 | 4.0757957 | 0.39144737 |
| ACE | 14 | 121.660355 | 0.39016393 |
| XDH | 12 | 732.52966 | 0.3552239 |
| TGFBR2 | 12 | 21.722208 | 0.4219858 |
| PPARA | 12 | 86.35543 | 0.43272728 |
| PDPK1 | 12 | 5.0785327 | 0.40338984 |
| NQO1 | 12 | 366.53577 | 0.40753424 |
| IGFBP3 | 12 | 13.01974 | 0.3789809 |
| FLT3 | 12 | 6.887968 | 0.3789809 |
| FGFR1 | 12 | 497.51163 | 0.40338984 |
| CYP19A1 | 12 | 92.34728 | 0.39403972 |
| ALK | 12 | 11.598277 | 0.4047619 |
| TERT | 10 | 237.27277 | 0.4047619 |
| SELP | 10 | 20.499308 | 0.371875 |
| PLAT | 10 | 8.383284 | 0.34593022 |
| HSPA1A | 10 | 0.35714287 | 0.37421384 |
| GSTP1 | 10 | 144.57645 | 0.38387096 |
| F2 | 10 | 259.68353 | 0.37421384 |
| CASP7 | 10 | 4.427046 | 0.3707165 |
| BMP2 | 10 | 45.098892 | 0.38387096 |
| TLR9 | 8 | 30.155632 | 0.3707165 |
| RET | 8 | 0 | 0.39534885 |
| CTSB | 8 | 1.6666666 | 0.34195402 |
| ARG1 | 8 | 76.25846 | 0.36956522 |
| TP73 | 6 | 1.5341991 | 0.32425067 |
| TOP1 | 6 | 0 | 0.33240223 |
| SPARC | 6 | 6.5121636 | 0.33426967 |
| SELE | 6 | 2.4333334 | 0.3628049 |
| IGFBP2 | 6 | 0 | 0.36728394 |
| GSR | 6 | 28.967533 | 0.3115183 |
| CYP1B1 | 6 | 5.6887183 | 0.31233597 |
| CTSS | 6 | 0.75 | 0.3409742 |
| ADAM17 | 6 | 2.0349207 | 0.36956522 |
| TTR | 4 | 0 | 0.32963988 |
| ODC1 | 4 | 3.1666667 | 0.29310346 |
| MMP13 | 4 | 6.9138722 | 0.35951662 |
| LDHA | 4 | 236 | 0.2895377 |
| HPRT1 | 4 | 236 | 0.26385808 |
| FABP5 | 4 | 0.65384614 | 0.33055556 |
| DAPK1 | 4 | 0 | 0.35843372 |
| APEX1 | 4 | 1.2083808 | 0.3753943 |
| TYMP | 2 | 0 | 0.24536082 |
| POT1 | 2 | 0 | 0.28883496 |
| PIM1 | 2 | 0 | 0.36060607 |
| PFKFB3 | 2 | 0 | 0.22495274 |
| NOX4 | 2 | 0 | 0.26269317 |
| MTAP | 2 | 0 | 0.20913884 |
| MIF | 2 | 0 | 0.3181818 |
| EDNRA | 2 | 0 | 0.27293578 |
| DHFR | 2 | 0 | 0.24536082 |
| ALOX5 | 2 | 0 | 0.32963988 |
| ABCB1 | 2 | 0 | 0.36060607 |
